# Supplementary material for: Identification of the Potential Biomarkers in Barrett’S Esophagus Derived Esophageal Adenocarcinoma
Source: Research Square preprint supplement (doi:10.21203/rs.3.rs-1127858/v1), 2021-12-03
Supplement: Supplementary file 3 [file 4e34d93331c9dd8750dc5982.xlsx]

## Sheet: eacmm
	MMsaddlebrown	MMdarkgreen	MMpurple	MMtan	MMlightgreen	MMlightyellow	MMblue	MMgrey60	MMmidnightblue	MMorangered4	MMgreenyellow	MMmagenta	MMpaleturquoise	MMyellowgreen	MMskyblue	MMviolet	MMsalmon	MMblack	MMdarkolivegreen	MMroyalblue	MMcyan	MMpink	MMdarkred	MMdarkturquoise	MMgrey
RFC2	-0.389438	0.234803	0.125045	0.26247	-0.124231	0.0368538	-0.125782	0.130684	0.206325	-0.0354393	0.0827919	0.0665159	-0.412164	-0.177174	0.0525916	0.13203	-0.100514	-0.452039	0.0145562	0.0888044	0.328014	0.122237	0.261517	0.126552	0.461117
HSPA6	-0.163722	0.00490557	-0.0288654	0.125343	-0.0649596	-0.0758943	0.163855	-0.0220699	0.00263862	-0.0379565	0.0459227	-0.0276161	-0.0535372	0.0621573	0.323356	0.705229	0.600784	0.0283095	-0.00801507	0.0100619	-0.0609618	-0.0220116	-0.00291819	0.0707871	0.234428
PAX8	-0.290406	0.196319	0.606912	0.077187	-0.146062	0.0767922	0.181586	0.0166594	0.210584	0.400592	-0.00377728	0.0313586	-0.15583	-0.0364558	-0.060967	-0.102352	-0.188384	-0.071825	-0.181888	-0.084838	0.223169	-0.120749	0.202841	-0.0335039	0.29706
GUCA1A	-0.0569144	0.074533	0.0393749	-0.040411	0.0224557	-0.0324962	-0.70839	-0.0310131	0.0100937	0.0689438	0.0224465	0.0190234	0.201157	0.238143	0.135282	0.175613	0.175728	0.205445	0.76261	0.0528234	0.430376	0.0993966	0.0671852	0.0600469	0.0203171
THRA	-0.402516	-0.201445	0.0978751	-0.0934822	0.390258	0.278557	0.174042	0.508189	0.290767	0.187566	0.0499774	0.170894	0.128405	-0.0745448	-0.0352683	0.0204606	0.0456695	0.151742	-0.103265	-0.139132	0.154435	-0.190461	0.0587995	0.040961	0.367966
PTPN21	-0.0110765	0.0693185	0.00244361	-0.0633574	-0.0669476	-0.0766886	-0.741563	-0.00877091	0.051985	0.0333116	-0.0762908	-0.0192341	0.180113	0.211772	0.104273	0.15527	0.153902	0.174799	0.793452	0.0359366	0.1177	0.0703217	0.098355	0.0470379	-0.0661461
CCL5	-0.390378	0.131295	0.0385185	0.430462	-0.081421	-0.0907356	-0.0843115	0.0121192	-0.0048229	0.102464	0.480791	0.562402	-0.181089	0.0349102	0.0271748	-0.173775	0.0621311	-0.11782	0.0131169	-0.111418	0.207246	-0.105195	-0.0373794	-0.131145	0.314506
CYP2E1	-0.170602	-0.0660893	-0.0888091	-0.0576329	-0.0078708	0.0679995	-0.211445	-0.0352503	-0.0937415	-0.0481156	-0.0206678	-0.0557533	-0.044081	0.145096	-0.0488306	-0.050618	-0.0353537	0.319798	0.154664	-0.057356	0.208238	-0.0506194	0.629976	-0.0253475	0.0821989
EPHB3	0.44313	-0.163678	-0.122418	-0.115844	-0.160851	-0.216574	-0.551358	-0.10322	-0.199745	-0.133987	-0.155276	-0.0562154	0.0165506	0.0999704	-0.0770779	-0.140353	-0.128823	-0.181796	0.280286	-0.0834106	-0.156751	-0.146135	-0.21099	-0.227582	-0.488578
ESRRA	0.0713141	0.106276	0.0769646	-0.00719609	-0.175996	-0.288524	-0.11199	0.0286564	0.126984	0.0943181	-0.106304	-0.00500502	0.422116	0.266463	0.327604	0.0710922	-0.00159522	0.0105272	0.177998	0.112782	-0.160408	-0.336597	-0.350777	0.23302	-0.147172
CYP2A6	-0.11571	0.587808	0.0509509	0.0196802	0.0429766	-0.00565452	-0.567531	-0.0425749	0.0169303	0.0354274	-0.0379058	-0.034292	0.183659	0.198829	0.0571689	0.172252	0.158968	0.237487	0.69102	0.0905941	0.0892452	0.0805357	0.0522048	0.0400452	0.0864988
SCARB1	-0.391959	0.0911609	-0.0737115	0.163138	-0.0366522	0.229183	0.626236	0.487848	0.300494	-0.0527873	0.229858	0.0594064	-0.0964521	-0.244498	0.00147937	-0.133217	0.0447767	-0.40704	-0.571499	-0.0175774	0.133492	0.161195	0.0742139	0.148455	0.520881
TTLL12	0.389659	-0.0191355	0.0251048	-0.153782	-0.121514	0.0114418	-0.233945	-0.0327204	-0.312981	-0.146321	-0.261089	-0.296923	0.217835	0.242132	-0.144229	-0.179338	-0.202162	-0.214383	0.133613	-0.122739	-0.421427	-0.0596758	-0.281895	-0.0617563	-0.547284
WFDC2	-0.307371	0.261187	0.281599	0.873018	0.240049	0.037891	0.179982	0.0157218	-0.0607489	-0.0830752	0.00386976	-0.0658465	-0.113545	-0.15685	-0.112049	-0.103687	-0.0247413	-0.0396794	-0.186613	-0.0789978	0.0178294	-0.0242945	-0.0227649	-0.00767841	0.333352
MAPK1	-0.10854	0.110245	-0.299497	-0.0127596	-0.114282	0.112318	-0.145086	0.259194	0.0937622	-0.0673775	0.0979634	0.0557283	-0.120497	-0.118216	-0.0997762	-0.0740553	-0.105412	0.113496	0.091852	-0.390887	0.00643413	-0.19437	0.104298	0.303583	0.110964
ADAM32	-0.161707	0.0422358	0.0141901	0.184437	0.0184133	-0.0464689	-0.225232	-0.00543223	-0.00153719	0.0202831	-0.134329	-0.0856611	0.0832567	0.122451	0.0664743	0.12342	0.0948888	0.223492	0.436552	0.0753099	0.0864444	0.688195	0.0769362	0.549507	0.209958
SPATA17	-0.0223707	0.0191788	-0.0651463	-0.0335094	-0.120691	-0.0358228	-0.298457	-0.0333927	-0.0844335	0.037574	-0.0962606	-0.0643752	0.0810302	0.0318668	0.0186929	0.108763	0.0935841	0.131045	0.411816	-0.0339591	0.40127	0.452744	0.0366374	0.0253052	0.0295375
PRR22	-0.0589985	0.0543777	0.0158097	-0.0230312	0.00114644	-0.0182367	-0.429924	-0.0161041	0.0396199	0.0774212	0.0389346	0.033898	0.120638	0.128718	0.596615	0.160253	0.153849	0.143606	0.505124	0.046214	0.0602892	0.0566969	0.0112099	0.0340959	0.015603
PXK	-0.0343765	0.0438353	-0.0135865	-0.137846	0.135113	0.0456354	-0.867806	-0.0911762	-0.130223	0.0786411	-0.105434	-0.0177564	0.211042	0.195506	0.104064	0.0400308	0.0612811	0.0519935	0.706759	-0.0259257	-0.00105017	-0.0560781	0.0942448	-0.0492537	-0.118129
VPS18	0.0420122	0.0804812	0.0317447	-0.0148772	-0.00326118	-0.0200101	-0.526219	-0.242313	-0.0226447	0.0147342	-0.025491	0.0256606	0.204609	0.160622	0.117389	0.200204	0.194208	0.203101	0.633743	0.0282914	0.398446	0.0204691	-0.250823	0.0421064	-0.0870454
MSANTD3	-0.489057	0.0667596	0.14373	0.136047	0.0818251	0.208865	0.170811	0.159278	0.272845	-0.215652	0.03307	-0.000693652	-0.366799	-0.115367	-0.0327272	0.135218	-0.197736	0.0985225	-0.156019	-0.0585961	0.379087	0.301473	0.214539	0.265058	0.544466
SLC46A1	-0.0973693	-0.0102443	-0.0099388	-0.0152729	-0.0549486	-0.049677	-0.0390587	-0.0433032	-0.046384	-0.046471	-0.0111441	-0.0380386	0.00294097	-0.0143866	-0.0134612	0.12294	0.00131266	0.0408488	0.0799522	0.98393	0.0199313	0.0308521	-0.0372462	0.0561018	0.0652548
TIMD4	-0.106494	0.0413073	0.0495622	0.027545	0.014774	-0.0199218	-0.313268	0.0154661	-0.00121976	0.0412965	0.0380202	0.857728	0.103961	0.104551	0.0736392	0.125267	0.0999014	0.155806	0.426119	0.0261381	0.0453295	0.0641568	-0.00730601	0.0277556	0.0876879
SLC39A5	0.543826	-0.14153	-0.209491	-0.259454	-0.23216	-0.0475835	0.209893	-0.110104	0.135643	-0.0958621	-0.240183	-0.215428	0.144223	-0.202695	0.146682	0.214852	-0.0139608	-0.0852656	-0.168743	0.145602	-0.224371	-0.19464	-0.196045	-0.218183	-0.402172
ATP6V1E2	-0.438566	0.156653	0.250403	-0.0675424	0.143497	0.169367	0.565313	0.274868	0.163108	0.0312309	-0.0222439	0.0780146	-0.156567	-0.25737	0.102786	0.173659	-0.143369	0.136785	-0.292762	0.055536	0.290827	0.358091	0.274625	0.447689	0.588771
AFG3L1P	-0.195659	-0.377495	0.059085	0.0958003	0.19808	0.350861	0.677683	0.174239	0.0519623	-0.0702226	0.185717	0.0926768	-0.157553	-0.317301	-0.186602	-0.288033	-0.0465506	-0.359563	-0.689268	-0.238	0.101298	0.0405616	-0.0310348	-0.0929882	0.208645
CILP2	-0.0599217	0.0170717	-0.00288984	0.108212	0.154794	0.0470669	-0.843906	-0.0540653	0.00687541	0.0611733	-0.0894858	0.032513	0.206945	0.366379	0.0664927	0.100932	0.10597	0.127383	0.805117	-0.014833	0.068215	0.00974774	0.0674018	0.0191253	-0.0679335
PIGX	-0.443957	-0.0255463	0.0607343	-0.107838	0.327548	0.0460069	0.272319	0.159217	0.15011	-0.134477	0.162007	-0.134603	-0.0431337	-0.278978	0.154338	-0.133199	0.0969676	-0.130608	-0.197498	0.232687	0.415374	0.329792	0.329492	0.275472	0.507857
TMEM196	0.0422057	0.0603173	0.0509932	-0.0873506	0.064495	-0.0332975	-0.879748	-0.0116784	0.0258205	0.0740086	-0.0425093	-0.00253495	0.213447	0.277638	0.167998	0.165431	0.185708	0.182525	0.911137	0.0487895	0.116691	0.0446196	0.0732719	0.0425051	-0.104174
SLC39A13	-0.453655	0.0861052	0.258464	0.449303	0.00433733	0.336976	0.448166	0.0975498	0.264791	-0.114591	0.171792	0.0104885	-0.215784	-0.291111	-0.191778	-0.142417	-0.0435949	-0.125764	-0.405188	0.456901	-0.0956679	-0.0533268	0.0697919	0.381654	0.479494
BEST4	-0.107413	-0.0509916	-0.0486101	0.372438	0.110106	0.433524	0.220381	-0.000445701	-0.0835414	-0.11181	-0.111778	-0.0342027	-0.11184	-0.13046	-0.117795	-0.0974881	-0.0949671	-0.0453626	-0.0896277	-0.0479194	-0.0923211	0.0714978	0.0938963	0.497648	0.12164
AK9	0.814237	-0.0216601	-0.29914	-0.391194	-0.381942	-0.232886	-0.0212076	-0.350165	-0.212575	-0.0219305	-0.231492	-0.186978	-0.0300305	0.10132	-0.141252	-0.115136	-0.163646	-0.172931	-0.115944	-0.104119	-0.07283	-0.177477	-0.207785	-0.201752	-0.738679
CORO6	-0.19964	0.0124821	-0.00368452	0.819843	-0.0581992	0.0513467	0.12467	-0.0114731	0.00449238	-0.0585831	0.00717135	-0.0560621	-0.047957	-0.0784033	-0.0300077	0.0073864	0.51911	-0.00455025	-0.081784	-0.0521677	-0.0349996	-0.0199996	-0.0260324	-0.0208228	0.233044
TMEM106A	-0.329005	-0.119025	0.104588	0.241298	0.446451	0.403308	-0.20458	-0.0308763	0.120603	0.0571104	-0.138818	0.159519	-0.151317	0.0719461	-0.0452502	-0.0452537	0.166027	0.173171	0.0431392	-0.102695	-0.181271	-0.287477	0.2299	-0.107458	0.228258
ALG10	0.0339185	0.065891	-0.167428	0.048208	-0.194711	-0.0571918	0.42145	-0.127338	-0.163027	-0.203364	0.164044	-0.0626238	-0.268562	-0.270074	0.286182	-0.135756	-0.232605	-0.215866	-0.382424	-0.0941301	0.198474	0.00463073	0.462671	0.271978	0.0631147
TTC39C	-0.166618	-0.0540102	0.0677752	0.381596	0.154848	-0.0494561	0.11091	0.000616739	-0.010515	-0.123715	0.0381934	0.000267838	-0.142406	-0.13964	-0.107621	-0.00981744	-0.273708	-0.0512028	-0.0523556	0.023746	0.0553221	0.0384701	0.311291	0.319846	0.207799
NEXN	0.371706	-0.336956	-0.21728	0.0940538	-0.0949069	-0.209881	0.29645	-0.125344	-0.22214	0.0744797	0.334532	0.0395648	-0.0871394	-0.0119624	-0.0520146	-0.164522	-0.196814	-0.047892	-0.294761	0.0650308	-0.156015	-0.141324	-0.220199	-0.169783	-0.32651
C15orf40	0.0242068	0.127422	-0.145045	-0.254636	-0.0942962	0.0826548	0.52167	0.0491132	0.152004	-0.18333	-0.00759823	0.105853	-0.277858	-0.363021	-0.131456	-0.0719168	-0.523208	-0.460811	-0.563542	-0.0260723	0.188238	0.0648589	0.167557	-0.0565198	0.0561318
RAX2	-0.12346	0.188518	0.0105927	0.265095	-0.026484	0.0362142	0.251579	0.424208	0.0294066	-0.0280024	-0.0061844	-0.0661888	0.160709	0.0192392	-0.0688798	0.00836133	0.332673	0.0364079	-0.0491276	-0.217392	-0.0228363	0.0033122	0.129824	-0.00997938	0.166059
MFAP3	0.626414	-0.24495	-0.0606103	-0.0425791	-0.393932	-0.193418	0.0801372	-0.337025	-0.364014	-0.225783	-0.30752	-0.19639	-0.0682343	0.118592	-0.187972	-0.191517	-0.249502	-0.357562	-0.23441	-0.0358887	-0.204895	-0.245118	0.049567	-0.0665674	-0.697924
EYA3	-0.0543443	0.0485776	0.00118441	0.0562129	0.0306588	0.0895921	-0.82187	-0.0703267	-0.0419185	0.0158139	-0.00566213	-0.0195011	0.164706	0.216771	0.140862	0.354467	0.146731	0.162775	0.820142	0.0195718	0.10386	0.0358403	0.0428659	0.0533797	-0.0246204
GIMAP1	-0.220668	0.187504	0.248039	0.018522	-0.0619256	-0.0637647	0.152966	-0.0154567	-0.0361767	-0.0505331	0.578934	0.798012	-0.122666	-0.109583	-0.0627262	0.15431	-0.0462644	-0.0391227	-0.0711306	-0.0407561	0.156023	-0.0161905	-0.0632868	-0.0216262	0.295472
KLK8	-0.0241802	-0.0129637	0.00133144	0.0269274	0.00985592	0.0105028	-0.626781	-0.0340716	0.00562832	0.0614875	-0.108692	0.0466225	0.0784061	0.182107	0.0739134	0.0373984	0.063137	0.0341685	0.530461	-0.0421926	0.0430234	-0.0120488	0.0321854	-0.0358896	-0.0525344
CCDC65	0.0195511	0.043645	0.0520752	-0.0394744	0.00442622	-0.0313175	-0.942669	-0.0486442	-0.00510801	0.0934482	-0.0474682	0.0731861	0.200148	0.307668	0.129172	0.147826	0.148456	0.159539	0.91853	0.0427463	0.114767	0.0274325	0.0564966	0.0472516	-0.113127
FAM122C	-0.164359	-0.0067316	-0.0262874	-0.0416484	0.843167	0.0268606	-0.310034	-0.0395242	-0.0441761	-0.0315295	0.0154638	-0.0203449	0.0106803	0.0120674	-0.0192139	0.00403322	0.0158954	0.070161	0.245522	-0.00433644	0.0835001	0.0351615	0.00869995	0.0362546	0.125672
CCDC11	0.0227815	0.0371002	0.00763548	-0.065304	-0.0348872	-0.0693093	-0.953964	-0.104495	-0.0440008	0.026557	-0.0831098	0.0515685	0.205286	0.250878	0.139793	0.132434	0.133321	0.164535	0.899428	0.0303328	0.145058	0.0104237	0.0178002	0.0406278	-0.143044
ARMCX4	0.107743	-0.0490394	-0.033737	0.448982	-0.0670787	-0.06168	-0.386051	-0.0803038	0.0329422	-0.0105732	-0.0586115	-0.0439435	0.0151407	0.0291329	-0.0355938	-0.0228252	-0.0210839	-0.0172741	0.283778	-0.0847099	0.00599781	-0.0456682	-0.00746721	-0.061416	-0.111468
RBBP6	-0.421594	0.307812	0.331975	0.116389	0.0840115	-0.178382	0.400319	0.0807866	0.130217	-0.01934	0.247293	0.0543292	-0.279089	-0.20168	0.0505399	0.0549296	0.318055	0.131164	-0.216497	-0.0646439	0.12782	0.446941	0.393537	0.240348	0.617854
CENPBD1	-0.487749	0.155997	0.244142	0.164784	0.133689	0.499283	0.402104	0.328856	0.199598	-0.163164	0.172732	-0.0572965	-0.287484	-0.387907	-0.292405	-0.241181	-0.0563664	-0.181234	-0.402153	0.0853666	0.190858	-0.153311	0.0559683	0.193529	0.471608
TRIOBP	-0.278278	0.178201	0.170442	0.0961599	-0.359242	-0.17743	-0.162461	-0.0804099	0.158675	0.157469	0.124463	0.101055	0.159075	0.244549	0.209225	0.197004	0.206467	0.209088	0.395112	0.1652	0.146608	0.258854	0.146994	0.2202	0.214642
CATSPER1	-0.00489519	0.167822	0.530566	0.0508019	-0.149373	-0.111028	-0.597299	-0.0468405	-0.0124199	0.0313028	-0.0654241	-0.0070087	0.273051	0.201993	0.217976	0.234757	0.284047	0.316507	0.814972	0.070838	0.120981	0.145788	0.00633408	0.0925102	-0.0140549
HOXD4	0.00851035	-0.02367	-0.0381997	-0.062498	-0.0589974	-0.0754403	-0.480902	-0.0884099	-0.0498712	-0.0342889	-0.0801063	-0.0391659	0.13793	0.0743143	0.00850124	0.0272208	0.0295088	0.0313845	0.355017	-0.061746	0.0231629	-0.0160089	-0.0274244	-0.0526571	-0.104651
GSC	-0.0787352	0.172332	0.0741553	-0.0542173	-0.0420639	-0.126735	-0.590546	-0.0501707	0.00395007	0.0544187	0.00499194	0.0365396	0.312378	0.228997	0.28995	0.434843	0.37372	0.43914	0.873667	0.109434	0.337362	0.199636	-0.00197298	0.119439	0.065977
SP7	-0.0727439	0.0876803	0.0824403	0.00321659	0.0530232	0.0113624	-0.52722	-0.0218596	-0.0197318	0.094931	0.0131467	-0.000860676	0.188865	0.250943	0.189652	0.221591	0.22818	0.765995	0.718542	0.0610555	0.0805585	0.0775547	0.0515596	0.065692	0.0473595
PDE7A	0.274648	-0.128224	-0.122968	0.117674	0.144447	0.46736	-0.0835953	0.0483282	-0.0528124	-0.0978625	-0.226435	0.0556977	0.0232314	0.0261488	-0.628465	-0.146939	-0.145207	-0.173763	-0.0686579	-0.278429	-0.260076	-0.134115	-0.148058	-0.24892	-0.284314
CNOT7	-0.105188	-0.0576777	-0.0089413	0.0353695	-0.0962788	-0.00508528	-0.357184	-0.231659	-0.195237	-0.0919582	0.377166	-0.00218941	-0.156581	-0.112187	-0.00777894	0.0509206	0.123102	-0.0955163	0.224677	-0.190737	-0.0756895	-0.0959707	0.101077	0.148729	0.0133734
CRYZL1	0.216011	0.294013	-0.21329	-0.197543	-0.108822	0.180586	-0.408148	-0.158323	-0.118092	0.0301273	-0.0651913	-0.10495	-0.0716036	-0.0375869	-0.406335	-0.19776	-0.0659785	-0.059321	0.180448	-0.125541	-0.0925133	-0.211881	-0.124052	-0.164292	-0.273449
PRSS33	-0.175557	-0.0419414	-0.0450053	-0.0560987	-0.0555093	-0.095855	-0.0240481	-0.037027	0.0484471	0.542003	0.0901198	0.0685134	-0.0666638	-0.0431613	-0.0139597	-0.0127248	-0.0504051	-0.0590923	0.0226799	-0.0605532	0.773356	0.0282082	-0.0245518	-0.011878	0.190385
C19orf26	-0.0257526	0.0469227	0.0187847	-0.0764111	0.0565426	-0.0250866	-0.601349	-0.0531627	-0.00539838	0.111895	-0.0231124	-0.000311227	0.188963	0.250892	0.142912	0.175227	0.146871	0.19255	0.677423	0.0700973	0.0786641	0.0527587	0.034636	0.0558714	-0.0755002
MCMDC2	-0.103427	0.0180584	-0.0220316	-0.0634533	-0.0684245	-0.101341	-0.141794	-0.00650945	0.0490384	-0.0321517	0.0554348	0.0188492	0.0180239	0.0210151	0.0411459	0.0447115	0.0379001	0.0447347	0.241574	0.0010606	0.971831	0.0902685	0.0306272	0.0582073	0.157954
TIRAP	0.0523926	0.384634	-0.0631246	-0.306718	-0.198107	-0.353964	0.0895454	-0.176253	-0.00794824	0.141509	0.151216	-0.121097	-0.100104	-0.140257	-0.000849856	-0.0514076	-0.0194366	0.0519048	0.0454958	0.307573	0.442136	-0.0218937	-0.0452559	0.382869	0.0367682
LEAP2	0.467719	-0.0567496	-0.258463	-0.349969	-0.150467	0.000715853	0.287467	-0.120623	-0.0855511	-0.169193	-0.343677	-0.129588	0.192038	-0.0416027	-0.203706	0.182482	-0.234656	-0.0166779	-0.198275	0.182593	-0.12229	-0.0388804	0.0846656	-0.213162	-0.420569
MSI2	-0.444501	0.258849	0.274098	0.352499	-0.0909074	-0.0981798	0.436061	0.00396974	0.0292157	-0.155959	0.21886	0.00492406	-0.237062	-0.266966	-0.0324122	-0.0049223	0.222543	0.155356	-0.278222	0.281209	0.400076	0.0932189	0.410079	0.407781	0.59832
SCIN	0.281084	0.126842	0.179131	-0.0185818	-0.376483	-0.213141	-0.243799	-0.118351	-0.0643634	-0.00555563	-0.186952	-0.349611	0.118951	0.10065	0.108579	-0.112918	0.00811666	0.033955	0.132424	-0.0763362	-0.308372	-0.651869	0.0216182	0.061825	-0.408959
CTCFL	-0.116697	0.020916	-0.00944254	-0.00276231	0.0148975	-0.0347943	-0.0103452	0.0168635	0.0125562	-0.0184362	-0.0155634	-0.0525753	0.0100379	0.0261376	0.0118099	0.032813	0.0153742	0.0494143	0.137454	0.0318067	0.0900821	0.97334	0.0239308	0.0444566	0.201488
C4orf33	0.5228	-0.242525	-0.0588799	-0.170968	-0.294488	-0.271926	-0.556765	-0.312119	-0.112628	0.00256046	-0.256864	-0.21523	-0.0421516	0.0293553	0.175129	-0.158593	-0.00276961	-0.35147	0.307792	-0.251566	0.0223789	-0.244081	-0.0950722	-0.290261	-0.622447
ZNF333	-0.0974777	-0.0526338	-0.0588386	-0.0909762	0.091284	0.684838	-0.295379	0.13882	-0.0839718	-0.0469062	-0.0999812	-0.0688844	-0.0229427	-0.0396434	-0.0294679	-0.0478003	-0.0505232	-0.00771073	0.210537	-0.0709639	-0.0455477	-0.0531346	-0.0636242	-0.0616941	-0.0047572
TVP23C	-0.0157934	0.139999	-0.0537668	-0.0702085	0.0500064	-0.137319	0.000627738	-0.0762162	0.153484	-0.0947303	-0.1235	-0.0506795	0.771475	0.547062	-0.0826459	-0.00358936	0.0234936	0.0367456	0.0632797	-0.022792	-0.108586	0.176261	-0.0541311	-0.0507046	-0.0812771
RDH10	0.00239442	0.0350437	0.0182967	0.14506	-0.140239	-0.0970371	0.125073	-0.0608725	-0.112846	0.0405134	-0.241781	-0.0754074	-0.0915587	0.153639	-0.259522	-0.18831	-0.36727	-0.174652	-0.275684	-0.159888	-0.187239	-0.260707	0.495227	0.302223	-0.086449
SRSF12	-0.0344044	0.0564968	0.0428949	-0.0804848	-0.0323836	-0.0810707	-0.85265	-0.0658182	-0.0131885	0.0587052	-0.0316472	0.138479	0.159648	0.227241	0.151544	0.164906	0.15143	0.284009	0.852038	0.0377687	0.165239	0.0322754	0.0411011	0.0403663	-0.0629714
FAM71A	-0.0696713	0.0099264	0.013888	-0.137683	0.065864	-0.275246	-0.764558	-0.0933348	-0.0883815	0.244105	-0.0186875	-0.014001	0.275112	0.492257	0.264947	0.298112	0.230552	0.280611	0.829278	0.165803	0.0627922	0.0654642	0.0890948	0.19993	-0.0752625
GAPT	0.0100812	-0.0437278	0.00357275	-0.0117956	-0.0259819	-0.032709	-0.0993264	0.0106189	-0.0224286	0.0153936	0.0936586	0.911948	-0.023422	0.00884141	0.0563293	-0.0132868	-0.0214428	-0.0230985	0.119613	-0.0290157	-0.0287951	-0.039233	-0.0405829	-0.044562	-0.00547881
ERICH5	-0.0762118	-0.114417	0.37642	0.0198645	-0.130306	-0.078211	-0.532591	-0.148189	-0.134578	-0.085672	-0.129846	-0.0428974	-0.0318232	0.111664	-0.0710843	0.155816	-0.0703174	-0.0919188	0.382627	0.364271	0.123649	-0.123592	0.227251	-0.0884042	-0.0851415
CCDC185	0.143083	-0.103653	-0.0759625	-0.270434	0.0601629	-0.12574	-0.778481	-0.0168033	-0.0358429	0.157342	-0.0680418	0.0287747	0.316841	0.357541	0.310524	0.212793	0.231787	0.304885	0.851839	0.054599	0.111305	0.0519812	0.00360125	0.128546	-0.179569
ENTHD1	0.015086	0.0531562	0.029538	-0.0796425	0.0200811	-0.0746538	-0.935939	-0.0568515	-0.0251032	0.0386423	-0.0382874	0.0356041	0.204927	0.277568	0.14623	0.15203	0.152011	0.176542	0.915656	0.0397687	0.128694	0.0373996	0.0563213	0.0521889	-0.109336
TSSK3	-0.0389225	0.171523	0.108123	-0.0292404	-0.0444138	-0.0792101	-0.689675	-0.00417981	0.0148652	0.0664684	-0.0189764	0.0181948	0.359368	0.307313	0.241119	0.339864	0.303741	0.277457	0.907856	0.0726194	0.15465	0.146696	0.0863995	0.0897262	-0.0171077
WFDC6	-0.010273	0.091138	0.0889461	-0.15211	0.0694639	-0.0306721	-0.592505	0.0328438	0.0640386	0.0628433	0.0291237	0.0226874	0.222072	0.313794	0.197733	0.196325	0.201414	0.237238	0.74161	0.0770859	0.111725	0.0953959	0.109204	0.0702503	-0.00928938
CLEC12A	-0.150163	0.0179465	-0.0210732	-0.0399964	-0.0682891	-0.103913	-0.200781	-0.041583	-0.0330886	0.00557432	0.276997	0.0369508	-0.00555797	0.0291676	0.0337746	0.0580822	0.0325278	0.0811867	0.277484	0.0389103	0.0381041	0.0204221	0.034826	0.859829	0.163401
BRF1	0.00417184	0.0539907	0.0269071	0.00713692	0.0205209	-0.0135556	-0.921479	-0.0384602	-0.00432417	0.0186687	-0.0422298	0.00521741	0.207838	0.313336	0.160382	0.155333	0.166328	0.171466	0.906521	0.0489171	0.117228	0.0312057	0.0578912	0.03011	-0.100883
C15orf27	-0.185253	-0.0137139	-0.0523072	0.100077	0.143508	-0.0326734	0.134476	0.0985263	0.0524246	-0.0568756	-0.0345442	-0.0290125	-0.0175046	0.0890045	-0.0330783	-0.0106282	-0.0332752	0.0291258	-0.0114817	0.00539401	0.068886	0.945435	0.00182975	0.129021	0.271428
CALML6	-0.032732	0.0218136	0.0371277	0.0168849	0.0545177	0.0487034	-0.580349	-0.0103889	0.00285292	0.0489125	-0.0505836	-0.0128361	0.594757	0.231934	0.0625247	0.0579179	0.0915252	0.0939451	0.551589	0.0165025	0.043188	0.00550107	0.0357091	0.0308006	-0.0701459
NLRP5	-0.0984726	0.147038	0.0413873	-0.0337879	-0.0309009	-0.0539408	-0.395575	-0.0230452	0.0166123	0.0416189	0.0342017	-0.0325847	0.202352	0.163593	0.212774	0.273378	0.908307	0.33799	0.622758	0.0784027	0.101516	0.148904	0.0202324	0.0688636	0.127806
ODF4	0.0545832	0.143832	0.075697	-0.0744608	-0.0535075	-0.0912677	-0.810542	-0.0491915	-0.00708161	0.0462834	-0.0579984	0.000443258	0.306339	0.276646	0.184465	0.299843	0.257943	0.331429	0.972536	0.101118	0.138927	0.13735	0.0306234	0.0969977	-0.0897617
CLEC4F	0.0912424	0.0961596	0.0402899	-0.138174	-0.110059	-0.140495	-0.817621	-0.0901865	-0.0483659	0.192251	-0.110872	0.0420721	0.313537	0.375244	0.184794	0.224964	0.217037	0.234033	0.906372	0.0685418	0.100922	0.0733081	-0.0480187	0.0482947	-0.206039
WFDC9	0.0215593	0.0554522	-0.0429768	-0.117967	-0.0436066	-0.162446	-0.393344	-0.0838639	-0.101897	0.0421607	-0.117272	-0.0200756	0.163061	0.230185	0.121046	0.183436	0.151986	0.208703	0.570134	0.646614	0.0757505	0.0953772	0.0230993	0.0805776	-0.108814
NEDD1	-0.00707978	-0.0762581	-0.100219	-0.114392	-0.0861956	-0.123487	-0.577583	0.0360711	-0.0922835	-0.0220538	-0.046532	-0.0949156	-0.0434826	0.0225597	-0.0252077	0.159364	0.159367	-0.0746837	0.402004	-0.104537	0.217517	-0.131268	0.253437	-0.111293	-0.0530225
TTLL10	0.0321344	0.12696	0.0505367	-0.120817	-0.0775182	-0.130932	-0.711092	-0.0763648	0.0274252	0.11712	-0.071945	-0.00300641	0.287524	0.197905	0.169283	0.304273	0.230243	0.319651	0.853707	0.0887524	0.139455	0.156664	0.0633399	0.0990433	-0.0788229
CALR3	-0.0280711	0.132834	0.0717398	-0.105545	-0.0249213	0.0193175	-0.828288	-0.0413197	-0.00679448	0.0443907	0.00380448	-0.0019213	0.29219	0.245027	0.178143	0.285156	0.270463	0.32734	0.953413	0.0880488	0.155818	0.131357	0.028263	0.0933266	-0.0341757
C10orf25	-0.320051	-0.0234076	-0.093499	-0.0827914	0.263254	0.0577582	0.331167	-0.0156568	-0.113573	0.174759	0.218864	-0.0641973	-0.116374	-0.12313	0.252679	0.189153	-0.0326021	0.304814	-0.0853657	0.180873	0.069493	0.449315	0.202287	0.619579	0.393488
ETV3	0.656198	-0.109652	-0.134726	-0.371342	-0.14359	-0.19881	-0.297723	-0.223976	-0.177607	-0.0587464	-0.197981	-0.267333	0.0363269	0.249106	-0.0606721	-0.0161242	-0.0538633	-0.0553705	0.147711	-0.0659851	-0.215174	-0.291629	-0.119893	-0.124736	-0.626503
KLHL10	0.0186221	0.0764728	0.0678067	0.0168677	0.0194879	0.00544629	-0.77616	0.000618516	0.0319921	0.0798032	-0.0348835	-0.00114044	0.21788	0.28699	0.164714	0.171958	0.174831	0.197046	0.847513	0.0584338	0.106498	0.0531645	0.0730899	0.051754	-0.0655005
TM2D3	0.00982141	0.0134407	-0.0565418	0.10594	-0.0682071	0.211513	0.773822	-0.0548406	-0.0662215	-0.117321	-0.0173058	0.114917	-0.254639	-0.244391	-0.210018	-0.171251	-0.0942078	-0.275638	-0.705884	-0.112619	0.0749815	0.188875	-0.0556159	-0.138239	0.0556023
ZNF485	-0.474378	-0.211768	-0.138464	-0.121625	0.257121	0.276801	-0.037514	0.297961	-0.0910498	-0.00560436	0.166594	0.187919	-0.0708648	-0.0651324	-0.0272196	0.045319	-0.260055	0.164078	0.104899	0.230673	0.373753	0.478501	0.300814	0.234155	0.437426
WDR17	-0.0110004	0.0394008	0.0495729	0.00433994	-0.000797067	-0.0281038	-0.88726	-0.0886	0.0219242	0.116516	-0.0215667	0.0760973	0.183554	0.267279	0.150875	0.126486	0.148197	0.152484	0.862607	0.028839	0.0958538	0.0170426	0.0434484	0.0383322	-0.092029
MFSD6L	0.176281	-0.132685	-0.134169	-0.152732	-0.151271	0.0277781	0.246845	0.217822	0.16329	-0.172164	-0.14857	-0.134319	-0.0904585	-0.167789	-0.141066	-0.11163	-0.154322	-0.10042	-0.223781	0.574824	-0.0133961	-0.0660745	-0.161776	-0.100224	-0.148281
ANKAR	-0.0070886	0.0525693	0.0413614	0.014729	0.0278632	0.0570532	-0.587363	0.00520765	0.0306581	0.0520533	-0.0106506	0.0113113	0.177831	0.276892	0.123614	0.120117	0.14626	0.142524	0.653725	0.0332631	0.0857916	0.0494711	0.0447128	0.0290171	-0.0324611
MEGF11	0.00408701	0.118779	0.0358693	-0.0329034	0.0196333	-0.152063	-0.817106	-0.111108	-0.0311292	0.0742179	-0.00794856	0.0292647	0.249965	0.267925	0.202567	0.264666	0.236048	0.470834	0.94288	0.105238	0.156495	0.124146	0.0630378	0.109614	-0.0503457
GPR182	0.0892467	0.0199014	0.0561787	-0.00406617	-0.066195	-0.365682	-0.647601	-0.104112	-0.0557183	0.0466395	-0.158066	0.00912028	0.141023	0.208734	0.0999769	0.0791554	0.0989701	0.0641161	0.554169	-0.00812519	0.0371243	-0.00581096	-0.195205	-0.0299411	-0.181926
ESX1	0.00534885	0.0432918	0.0530012	-0.0205178	-0.0168278	-0.0181645	-0.800614	0.00944308	0.0478492	0.093975	-0.0196676	-0.00536289	0.182294	0.315316	0.125204	0.132706	0.141237	0.131887	0.80888	0.0391975	0.101443	0.0283715	0.09655	0.0258068	-0.0781445
C8orf12	-0.00343702	0.121395	0.0784553	-0.142794	-0.117093	-0.179077	-0.702847	-0.0544162	-0.0458484	0.0919518	0.0197089	0.0353371	0.233752	0.265925	0.252725	0.294546	0.240395	0.331747	0.840194	0.0979375	0.165383	0.141841	0.0524986	0.0917445	-0.0487389
DNAJC5G	-0.00348894	0.123878	0.0389427	-0.127144	-0.0578064	-0.124813	-0.689826	-0.0303483	-0.0674453	0.131462	0.0329165	0.0278274	0.297784	0.267667	0.275478	0.364865	0.275603	0.471477	0.89832	0.0567249	0.161035	0.139351	0.0788272	0.0721486	-0.0330107
WDR88	-0.0545915	0.0498052	0.0149803	-0.0145605	0.0049304	-0.0880376	-0.685852	-0.0836315	-0.0440331	0.00361857	-0.0614985	-0.0490399	0.142102	0.176143	0.114473	0.159207	0.143106	0.212381	0.710457	0.0107343	0.107731	0.123921	0.0152655	0.0203315	-0.0444456
PRUNE2	0.310767	-0.170559	-0.173604	-0.212697	-0.189375	-0.172761	0.279823	0.0777383	0.230148	-0.107451	-0.148304	-0.109118	-0.135412	-0.152488	0.26961	-0.138278	-0.177863	-0.191782	-0.307219	-0.156673	-0.0767294	-0.115817	-0.187536	-0.185731	-0.272878
MBD3L2	-0.0642906	0.109391	0.0614467	-0.0214571	-0.0211863	-0.0735157	-0.76193	-0.0507651	0.00290728	0.0811258	0.00689802	0.0150057	0.302339	0.308175	0.223829	0.302248	0.286465	0.401622	0.894454	0.0338579	0.127717	0.144687	0.057672	0.0799362	0.00541259
ADAMTSL1	-0.00292239	0.141863	0.0698898	-0.0270797	-0.0453478	-0.0893043	-0.843345	-0.0606806	-0.0158802	0.0517326	-0.0499716	0.0136414	0.294772	0.277335	0.218912	0.299105	0.278563	0.338756	0.975526	0.0945938	0.162808	0.144088	0.0327298	0.0916039	-0.0490081
MBD3L1	0.016398	0.0471276	0.0434403	-0.023841	0.0374462	0.000549902	-0.813174	-0.0291278	0.033372	0.083151	-0.0281646	-0.00371636	0.161196	0.240782	0.109523	0.127483	0.141348	0.14232	0.778067	0.0365651	0.110595	0.0325659	0.0537686	0.0291167	-0.0824974
FAM46D	-0.0588939	0.142498	0.114411	-0.0570716	-0.0643477	-0.077212	-0.707039	-0.0811532	-0.0591468	0.0192578	0.24654	0.0668122	0.284428	0.264769	0.199763	0.289138	0.269934	0.363496	0.896651	0.0971686	0.165463	0.155979	0.0151548	0.107572	0.0101068
SERPINB11	0.0423219	-0.0912021	-0.0788707	-0.0584143	-0.0960626	-0.0991312	-0.0257173	-0.0952798	-0.115696	-0.0752797	-0.125773	-0.0361781	0.0359106	0.390397	-0.0890473	-0.0553963	-0.0783997	-0.0704687	-0.0603485	-0.0365964	-0.120704	-0.0710469	-0.0859405	-0.0925406	-0.244906
LINC00161	-0.00518225	0.0563014	0.0510424	-0.0355327	0.044858	-0.0125997	-0.90521	-0.0502709	-0.00324466	0.105748	-0.0398954	0.0128017	0.182311	0.265097	0.152226	0.145943	0.158654	0.198687	0.906796	0.0463674	0.123186	0.0373185	0.0581937	0.0465337	-0.0858574
DSCR10	0.0146106	0.0746453	0.00777611	-0.134573	-0.104064	-0.15434	-0.676629	-0.105837	-0.0636664	0.129347	-0.0911545	-0.00339932	0.246775	0.339204	0.109325	0.422675	0.182047	0.230975	0.803865	0.224541	0.095252	0.0880623	0.0907508	0.0398394	-0.115307
ABHD11	-0.000225222	-0.0178041	-0.0374435	-0.0576221	-0.0602691	-0.0541483	-0.433923	-0.0661557	-0.0425791	-0.0356566	-0.0861365	-0.0882205	0.0268613	0.0482666	0.00393633	0.0244814	0.0119299	0.000257357	0.301306	-0.0697984	0.00626779	-0.0333058	-0.0255964	-0.0518868	-0.0807688
ACAP2	0.0518741	-0.126767	-0.101244	-0.16396	-0.206741	0.0630651	0.361607	-0.0746909	0.0219632	-0.0783861	-0.0916689	-0.236821	0.00230117	-0.0467201	0.00594179	-0.204853	-0.217237	-0.049147	-0.387856	0.0133389	0.110547	-0.124698	0.263485	0.0957355	-0.0779745
GAMT	0.189648	0.19352	0.308217	-0.0238065	-0.305679	-0.242489	0.177396	-0.0833451	-0.0548759	0.0708836	-0.0794518	-0.0218855	0.336183	-0.0576388	-0.0407632	-0.0430103	-0.0338761	-0.0574694	-0.148465	-0.0853642	-0.0796619	-0.0543607	-0.064633	-0.0810095	-0.141666
PLCD3	0.0251307	0.0912567	-0.0183894	-0.0955937	-0.0194741	-0.0741999	0.0119345	-0.114536	-0.0580663	0.00354166	-0.0894954	-0.0973416	0.0399268	0.235058	0.300211	0.0365677	0.04309	0.477724	0.226354	0.0252824	-0.0995723	-0.00776939	-0.028357	0.168829	-0.125279
IRF6	0.0638493	0.154461	0.124276	0.386049	-0.456268	0.11996	-0.396106	0.0393747	0.0334016	-0.118663	-0.0940402	-0.227025	0.0104262	-0.164835	0.0673223	0.0175865	0.056111	-0.0522882	0.256596	-0.150892	-0.267441	-0.270253	0.00910591	-0.0589586	-0.100245
PTPRC	-0.0126227	0.0551101	0.0581916	-0.0334404	-0.00498248	-0.0354604	-0.837009	-0.0598611	-0.0163659	0.0277927	-0.0433847	0.0443316	0.162446	0.231445	0.121093	0.150275	0.138032	0.186491	0.826081	0.0455152	0.187702	0.0469603	0.0356573	0.0376348	-0.0733219
MAN1A2	0.519455	-0.179139	-0.196429	-0.143409	-0.13623	-0.207876	0.156429	-0.253086	-0.261536	-0.196445	-0.216007	-0.139979	-0.151421	0.05099	-0.309915	-0.276727	-0.255927	-0.266477	-0.32369	-0.157539	0.279688	-0.219515	0.136682	0.0237602	-0.417705
RAPH1	0.116339	-0.167021	-0.176409	-0.159068	0.369584	-0.006804	-0.592353	-0.204283	-0.197075	-0.0662173	-0.192299	-0.131521	0.0377401	0.298804	-0.120592	-0.119589	-0.121886	-0.0401956	0.286751	-0.165283	-0.112987	-0.16096	-0.135325	-0.17447	-0.3174
SMCR8	-0.0953317	0.0695456	0.0648785	-0.0031684	-0.0569476	-0.0343724	-0.0560564	-0.000320866	0.0336727	0.0188127	0.0165736	-0.0598775	0.0554427	0.0504136	0.0733743	0.115103	0.981994	0.122399	0.187847	0.011141	0.0207922	0.0333798	0.00454675	-0.00868657	0.147187
LACTB	-0.117147	-0.00685595	-0.130442	-0.0701872	-0.00801844	-0.214039	0.302977	-0.156057	-0.0746155	-0.106693	0.224556	-0.143297	-0.0924155	-0.111569	-0.0726626	0.115563	-0.0851655	0.354075	-0.131366	-0.0559313	0.422568	0.144601	0.52056	0.339617	0.221281
BNC1	-0.0040751	-0.082242	-0.0645337	-0.0626378	-0.0945564	-0.109482	-0.301756	-0.141913	-0.133964	-0.0849067	-0.138584	-0.00136704	0.0452369	0.497862	-0.07289	-0.0757761	-0.0499994	-0.0521677	0.099832	-0.0660915	-0.112181	-0.0849809	-0.0960586	-0.132374	-0.229044
MPP4	0.0167708	0.10563	0.0552317	-0.0610454	-0.0411204	-0.0813442	-0.847421	-0.0411838	0.00151346	0.0392851	-0.0558808	0.0311308	0.283951	0.278267	0.180784	0.279364	0.247025	0.289123	0.962222	0.084511	0.163413	0.137719	0.0426232	0.0942751	-0.0702998
LACE1	-0.10272	0.0243182	-0.00581292	-0.0776309	0.0469719	-0.0141647	-0.311254	0.0256831	-0.0600626	0.1481	-0.0215448	-0.0896253	0.0572564	0.136718	0.0622315	0.302636	0.0720988	0.529325	0.510263	0.0154111	0.0699596	0.461282	0.0519681	0.130853	0.0969245
IDI2	0.0143125	0.103039	0.0824529	0.0168202	0.0615025	0.024192	-0.779344	0.0204878	0.0240707	0.123259	-0.112332	-0.0127129	0.315108	0.330934	0.112615	0.245807	0.242827	0.271205	0.91011	0.0698506	0.114737	0.133795	0.079214	0.0745712	-0.0631425
CYP11B1	-0.00831056	0.129033	0.0861212	-0.00163447	-0.0294612	-0.060109	-0.749335	-0.0144435	0.04131	0.0609022	-0.0346547	0.000991782	0.289247	0.267758	0.216081	0.263828	0.268514	0.272122	0.902286	0.0819112	0.144713	0.138967	0.0623338	0.105614	-0.0203378
TAF8	-0.0617292	0.180184	0.185907	0.0359936	-0.0828346	-0.135851	-0.638777	-0.0551633	-0.0196481	0.0205826	0.0535805	0.0124322	0.282546	0.207976	0.25808	0.359915	0.264635	0.459042	0.889651	0.118733	0.197356	0.331952	0.0139479	0.14053	0.0636178
COBL	-0.243747	0.275658	0.00838698	-0.0484192	-0.0522206	-0.011707	-0.476356	0.0865462	0.351304	0.0785733	-0.0630807	-0.12778	-0.0115329	0.0459936	0.214948	0.0624134	0.441711	0.0108704	0.461283	-0.0457083	-0.00688046	-0.064445	0.0495282	0.266722	0.210091
SLAMF6	-0.116602	0.0916055	0.0263527	0.0143061	0.00580226	-0.000482488	0.0457141	0.0383827	-0.00126971	0.00973684	0.0883275	0.937506	-0.04005	-0.0191756	-0.0157031	-0.00842374	0.0375461	0.036066	0.0282318	-0.00387415	-0.022691	-0.0103283	-0.0272044	-0.0228562	0.137589
ZSCAN20	0.0478685	0.300276	0.267297	-0.0233276	-0.116247	-0.120326	-0.040162	-0.0757254	0.0225841	-0.0709851	-0.00331787	0.0187124	-0.0194164	-0.0486633	0.857393	0.0491667	0.0526969	0.054814	0.110325	-0.0254049	-0.0339477	-0.00923621	-0.0729896	-0.0398431	0.06736
GPBAR1	-0.16568	-0.0134222	-0.0252791	-0.0352298	0.808368	0.0287919	-0.253165	-0.0245643	-0.0631712	0.0444756	0.0206812	-0.0313025	0.0382833	0.0818614	0.00432233	0.0519537	0.0407965	0.146301	0.240517	0.00553156	-0.00164162	0.022045	0.00492686	0.0349699	0.111995
RHBDL2	0.546013	-0.128704	-0.0056193	-0.0979766	0.0312994	0.161708	-0.228647	-0.49719	-0.119513	-0.205134	-0.444575	-0.232029	0.0994097	0.0555061	-0.259228	-0.103728	-0.104225	-0.162676	0.0047746	-0.271888	-0.428346	-0.38631	-0.138213	-0.300402	-0.662374
FRAS1	-0.0448932	0.143631	0.0838853	0.0177223	-0.0273257	-0.0821142	-0.732352	-0.0684578	-0.0103188	0.0962494	0.0369147	0.0210695	0.270647	0.307114	0.248229	0.310189	0.279424	0.360477	0.883049	0.100523	0.147384	0.131033	0.0874516	0.113189	-0.0039549
BRSK1	-0.00350461	0.0209692	-0.00622805	-0.000603498	-0.0223053	-0.0530215	-0.635369	-0.0827634	0.0078665	0.0574879	-0.0572001	-0.0666764	0.0540738	0.15905	0.247082	0.114004	0.409325	0.121973	0.639834	0.010115	0.0135608	-0.0411069	-0.0160956	-0.0561475	-0.0646333
CRB2	-0.0843341	0.199039	0.102731	-0.0641452	-0.0603939	-0.104064	-0.628552	-0.0126164	0.0327267	0.120376	-0.0157422	0.0332242	0.354065	0.241133	0.262024	0.423135	0.372082	0.468902	0.913058	0.11307	0.183503	0.218856	0.0589935	0.13706	0.0577162
KCNE4	-0.0114193	-0.111545	-0.103311	0.0322754	0.143514	-0.0556132	-0.213635	0.177512	-0.109872	0.171567	-0.073004	-0.0230684	0.129296	0.591517	-0.0720231	-0.0580697	-0.0728031	-0.0380836	0.102777	-0.0579592	-0.112639	-0.0951787	-0.0654285	-0.0868449	-0.145367
CD300LG	-0.0289926	0.0335388	0.0303994	-0.0158942	0.0381412	-0.0118685	-0.5874	-0.0216169	0.0147927	0.144502	-0.0238485	0.00986797	0.158884	0.180761	0.132452	0.157977	0.130643	0.188342	0.643126	0.0519908	0.07072	0.041196	0.017541	0.048593	-0.0560747
SLC34A3	0.0325374	0.0103138	-0.00798897	-0.010595	0.0187631	0.0292793	-0.29755	-0.00130572	-0.0562507	0.0203058	-0.0991948	-0.0929755	0.337981	0.113159	-0.629952	0.00749848	0.0172087	0.0418506	0.260574	-0.0157098	0.0194834	-0.00733785	0.00149683	-0.00308567	-0.118844
CPA6	-0.242467	-0.017888	-0.00736651	-0.0437467	-0.0745418	-0.0519893	0.185604	0.0454356	0.648315	-0.0685422	-0.0183889	-0.0669876	-0.0954538	-0.10347	-0.0449624	-0.035159	-0.0618545	-0.0730194	-0.0961	-0.0340372	0.517101	0.0114627	0.193893	0.504644	0.329969
WBP2NL	-0.157152	0.0362598	0.883564	0.0613073	-0.0526104	-0.0366219	-0.113233	-0.0528218	-0.0187807	-0.0196495	-0.0949269	-0.0801482	-0.0255878	-0.0359251	0.00416988	0.0103189	0.135728	0.0585887	0.170482	-0.0260124	-0.0119438	-0.0165754	0.00160233	0.370881	0.146088
HIPK1	-0.00450206	0.166083	0.0704993	-0.0874636	-0.060868	-0.0863648	-0.803486	-0.0643191	-0.0274486	0.0165193	-0.00725113	0.00328421	0.272919	0.301925	0.208051	0.273089	0.276498	0.443022	0.946652	0.0910451	0.152249	0.212746	0.0359113	0.111721	-0.0271734
MTBP	-0.210908	0.10773	0.334657	0.106221	-0.0304917	-0.0337806	-0.60181	0.0299715	0.0984893	0.0171211	-0.00143417	-0.0314849	0.115234	0.138492	0.132755	0.18856	0.320816	0.204327	0.72922	0.0597793	0.561534	0.0856677	0.0718186	0.235268	0.206862
ACVR1C	0.130644	0.429162	-0.144464	0.165538	-0.221848	-0.211407	0.12947	0.160196	-0.141557	-0.0273851	-0.116713	0.0186332	-0.0279202	-0.135935	0.28901	-0.0229436	0.0779051	0.264074	0.0270225	-0.157637	0.146921	-0.150672	0.209432	0.162939	0.0365997
TMEM74	-0.0647167	0.0391224	0.0391808	-0.0180011	0.0128695	-0.103117	-0.791059	-0.0742977	-0.0306145	0.0663407	-0.00525739	0.15382	0.208709	0.22044	0.118338	0.142244	0.134395	0.150725	0.748582	0.0218578	0.0814784	0.0441352	0.181684	0.0242479	-0.0295331
TIGD4	-0.0139502	0.102107	0.0483221	-0.0383508	0.0114699	-0.0433538	-0.862207	-0.0411663	0.00362358	0.0628665	-0.0586821	0.00161327	0.218134	0.276199	0.156636	0.207198	0.186629	0.241524	0.935274	0.0827921	0.153056	0.315887	0.0768252	0.0800205	-0.0315039
ART5	0.0594038	0.0378906	-0.000256928	-0.148194	-0.0974479	-0.125429	-0.439384	-0.116427	-0.108314	0.00452796	-0.139897	0.0158678	0.23575	0.958453	0.13181	0.186588	0.143727	0.201085	0.489202	0.0629522	-0.00415867	0.0234742	-0.000359831	0.0119109	-0.221422
FAM71C	-0.0335704	0.143747	0.121066	-0.023707	-0.0714541	-0.109029	-0.759604	-0.0252897	-0.0181168	0.070295	-0.048619	0.00367865	0.270774	0.299536	0.207621	0.29743	0.280173	0.421062	0.901131	0.0980793	0.143918	0.109678	0.00812406	0.0917714	-0.0391398
C21orf67	0.0772163	0.00699059	0.78105	0.0351735	-0.116732	-0.0965178	-0.283782	-0.0889222	-0.0593326	-0.00697174	-0.112644	-0.0532263	0.0628924	0.0707143	0.00621682	0.0364	0.0397819	0.0419161	0.317958	-0.0435448	-0.049771	-0.0278393	-0.040047	-0.0496135	-0.139577
NLRP11	-0.0956509	0.117305	0.0761476	0.00298836	0.402547	0.0312579	-0.712997	-0.0390028	0.0259257	0.0897849	-0.0906618	-0.0240927	0.221936	0.220152	0.190901	0.233716	0.370281	0.295218	0.809282	0.0293075	0.119852	0.113429	0.044094	0.0921306	0.06594
ATP6V1C2	-0.198034	-0.106614	0.245137	-0.0365372	-0.0587928	-0.0378345	0.112497	-0.0745011	-0.0313808	0.46269	-0.0202207	0.263867	-0.00340829	-0.123864	0.350584	-0.125189	-0.124704	-0.216216	-0.189413	-0.140255	0.12624	0.103646	-0.135527	-0.127545	0.118358
CLDN19	-0.167965	0.280914	0.0305946	-0.0521733	0.678936	-0.00589804	-0.508705	-0.0423102	-0.0295289	-0.00400054	-0.0179607	-0.0470565	0.227526	0.164399	0.111763	0.196333	0.197125	0.283069	0.649091	0.0652235	0.116368	0.250563	0.0145974	0.0884568	0.150667
VTI1A	0.0553296	-0.192622	-0.177167	0.265262	0.451749	0.300708	0.0211548	0.137942	-0.149726	-0.0351407	-0.246268	-0.224817	0.0896763	0.18896	-0.238886	-0.280295	-0.229645	-0.0976418	-0.213335	-0.259959	-0.194164	-0.222922	-0.0191513	-0.227419	-0.140814
KIF6	-0.0128531	0.0904975	0.0709478	0.034907	-0.0520358	-0.0605419	-0.86158	-0.0620479	-0.0239806	0.0195476	0.00611963	0.0234763	0.24215	0.353697	0.143908	0.20867	0.228281	0.234907	0.927453	0.0691142	0.266141	0.0940328	0.03249	0.0719844	-0.0628841
IQCD	0.178453	-0.00537482	-0.0454418	-0.068575	-0.0914503	-0.24797	0.090503	0.119631	-0.0284859	-0.0471797	0.015509	-0.0576364	-0.0243711	-0.0171339	0.0126644	0.000454323	0.00808722	0.344284	0.0713716	-0.0106527	0.563041	0.282624	0.00435699	0.0217871	0.0464034
TAGAP	0.207639	-0.0433562	-0.0563615	-0.091702	-0.0619187	-0.108512	-0.606736	-0.116264	-0.112628	-0.0420605	0.0829239	-0.0590457	0.510812	0.282175	-0.0113721	0.0485712	0.14182	0.0242888	0.551142	-0.037609	-0.00689493	-0.0621441	0.136825	-0.0239193	-0.263425
STON2	0.176125	-0.00450007	-0.0501986	-0.0401089	-0.0408165	-0.0798656	0.0086228	-0.0449678	-0.035745	-0.0399376	-0.110815	-0.0833322	0.019435	0.135817	0.00228287	0.0267752	0.025773	0.0421324	0.113905	0.00884224	0.0273876	0.785014	-0.0216854	0.0115633	-0.015363
SERPINA12	0.0831321	0.112636	0.0585846	-0.171019	-0.032547	-0.0701525	-0.682311	-0.0942498	-0.0347726	-0.0275638	-0.114144	-0.0577768	0.273923	0.266521	0.158218	0.171043	0.198862	0.240048	0.786432	0.0995736	0.125885	0.030955	-0.027668	0.187588	-0.139931
LETM2	-0.0175238	-0.034893	-0.015016	0.530566	-0.0975514	-0.0166509	-0.0685486	-0.0712207	-0.0652031	-0.0757781	-0.0639873	-0.0793097	-0.0741564	-0.0622886	-0.0800058	-0.0768158	-0.0650478	-0.072626	-0.00316892	-0.0596485	-0.0534106	-0.0888527	-0.0284807	0.326463	0.0229571
BSND	0.00616905	0.150724	0.0821127	-0.0727482	-0.0117019	-0.0893744	-0.798412	-0.0541472	0.00939212	0.078321	-0.0604055	0.00731925	0.309347	0.303484	0.268944	0.312819	0.295882	0.346621	0.977883	0.113662	0.161979	0.169097	0.0335764	0.125771	-0.0531235
CLEC4C	-0.0432382	0.0240991	0.0209328	0.0129802	-0.0488421	0.0121516	-0.714847	0.31273	0.0176075	0.0780643	-0.0157296	-0.00110233	0.193356	0.253659	0.0884355	0.100344	0.118412	0.121789	0.72362	0.0062283	0.0829524	0.0234741	0.0455741	0.0019706	-0.0120631
NLRC4	-0.302667	-0.0466362	-0.0320758	0.841565	0.0488359	0.494628	0.124216	0.0540077	0.0719713	-0.110194	0.119868	0.0888281	-0.11415	-0.167747	-0.122395	-0.111493	-0.0842117	-0.066329	-0.162133	0.0598637	-0.0566117	-0.0521865	-0.0657391	-0.0205904	0.274876
PRSS36	-0.0368163	-0.00483963	0.422456	-0.0105698	-0.0898556	-0.114107	0.0158996	-0.0618694	-0.0652247	-0.0493599	-0.135485	-0.0882378	0.01062	0.0235212	-0.0456923	0.059242	-0.0108558	0.0166565	0.0810179	-0.0119094	-0.0239888	0.549087	-0.0534074	-0.0270178	0.0084293
ZDHHC15	-0.0467835	-0.00438605	0.00423047	-0.106902	0.184227	-0.0546838	-0.644411	-0.0617014	-0.0904503	0.0085774	-0.104073	0.265486	0.153465	0.211998	0.0277775	0.0834696	0.0627715	0.112939	0.600777	-0.00248146	0.0154447	0.0132433	-0.0103615	-0.0112233	-0.110531
RAI1	-0.221059	0.222321	0.013104	-0.0141824	-0.00330954	-0.0855173	0.324717	0.0182452	0.0408418	-0.0252449	0.0690309	-0.0383535	-0.013724	-0.028172	0.304963	0.569338	0.38918	0.422765	0.0671957	0.07685	0.293806	0.497283	0.0279057	0.219617	0.416151
CDK15	-0.0883638	0.00972767	0.00915263	-0.0311292	-0.0583789	-0.0905746	-0.10505	-0.0426908	-0.0516816	-0.0180147	-0.0317108	-0.0342759	0.0321649	0.0275268	0.0110366	0.0710913	0.0319226	0.0827298	0.162041	0.986063	0.0400668	0.0542724	-0.0268321	0.0694755	0.0440966
ZNF570	-0.158861	0.0182478	0.0553807	0.0205142	-0.0167751	-0.0311199	-0.326229	-0.0970318	-0.0861464	0.0336616	0.026305	0.0174591	0.12285	0.121099	0.0564197	0.138248	0.128113	0.164571	0.397688	0.915175	0.0456084	0.0918621	-0.0205746	0.0508459	0.0615186
AF131215.4	-0.0768766	-0.0957067	-0.103918	-0.0914774	0.628207	-0.0297634	-0.348545	-0.115367	-0.12354	-0.0201823	-0.0572002	-0.0399687	-0.0194519	0.236948	-0.0735721	-0.0601452	-0.0566578	-0.0130102	0.14945	-0.0660813	-0.0589651	-0.0640359	-0.0469238	-0.0500508	-0.0507581
NUDT9P1	-0.0758796	0.0828691	0.0895147	-0.0247122	0.00455273	0.0109722	-0.812794	0.00362537	0.034101	0.0926124	-0.0435035	0.370072	0.218905	0.238527	0.179442	0.206351	0.207234	0.229581	0.896658	0.0642614	0.123761	0.0788794	0.012233	0.0597138	-0.00136118
BTBD16	-0.106292	0.02616	0.949001	0.0937399	-0.0116922	0.0159221	0.0762792	-0.0345003	-0.012599	-0.025338	-0.0629057	-0.0510939	-0.0508869	-0.0705792	-0.0126226	-0.0339874	0.0126079	0.258489	-0.0111415	-0.0424546	-0.0638943	-0.0375138	-0.0179111	-0.0325467	0.113828
RTP3	-0.0750725	0.429339	0.0331507	-0.014591	-0.0680788	-0.103632	-0.534088	-0.101439	-0.0448117	-0.029575	-0.0567448	-0.0315684	0.104335	0.124665	0.0644527	0.0866573	0.0983711	0.125493	0.519278	0.478266	0.0827829	0.0912666	-0.0036931	0.0218261	0.0469849
TSPEAR	-0.101873	0.0585124	0.0195439	0.00815142	0.076264	-0.0196588	-0.741564	0.0210187	0.0182815	0.0872902	-0.0177867	0.0228449	0.124169	0.22472	0.18072	0.109675	0.133913	0.191447	0.763351	0.0337034	0.12795	0.422735	0.0630731	0.0215666	0.0737807
MIPOL1	-0.0496042	0.0402927	0.0245149	0.0768423	-0.0141671	-0.0397761	-0.870937	-0.0559982	-0.00619824	0.0416236	-0.0233529	0.00528334	0.149555	0.233051	0.120902	0.125709	0.132616	0.124163	0.853231	0.01545	0.418433	0.0320347	0.0840423	0.0393815	-0.0242391
C6orf141	0.42703	-0.245933	-0.279793	-0.272291	0.095216	0.28413	0.0403312	-0.122525	-0.244788	-0.0709179	-0.228362	-0.243949	0.148412	0.00952186	-0.260228	-0.120492	-0.14059	-0.125983	-0.100574	-0.182102	-0.335663	-0.314743	0.267931	0.054746	-0.477545
ALMS1P	-0.31535	0.0373601	-0.00838787	-0.00827653	0.452075	0.228927	0.137724	0.282413	0.01903	-0.0362497	0.00930603	-0.0853493	-0.039415	-0.0471864	0.275604	0.0258209	0.431844	0.726411	0.0448882	-0.000290266	-0.0150663	0.258576	0.0332597	0.0318337	0.402879
MYO3B	-0.0401078	0.0835332	0.0380459	-0.00279618	0.0140982	-0.0565	-0.697605	-0.0337632	0.0231552	0.0592478	-0.048551	-0.0238628	0.198054	0.207225	0.167033	0.197785	0.195214	0.324961	0.811313	0.067291	0.156672	0.459143	0.0464475	0.0787844	0.034761
ADAM21	-0.156868	0.171026	0.0970618	0.00880214	0.0940372	0.0336557	-0.702796	0.0202526	0.0190879	0.0649381	0.0698357	0.0494772	0.296744	0.287996	0.230823	0.309991	0.278956	0.375656	0.915276	0.121946	0.182462	0.168472	0.114921	0.134733	0.103167
TRIML2	-0.11531	0.121314	0.105527	-0.110932	-0.109695	-0.0159113	-0.535807	0.0291762	0.0500153	0.0750195	0.0353933	0.157987	0.195303	0.215629	0.212988	0.228365	0.207303	0.234318	0.668486	0.090181	0.144943	0.0893294	0.0596998	0.127909	0.0681145
ABCC13	0.411689	-0.112706	-0.122309	-0.164368	-0.0820716	-0.126387	-2.47856e-05	-0.160186	-0.142062	-0.0447834	-0.160355	-0.0981422	0.0209208	-0.0080089	-0.0435139	-0.0528407	-0.0785637	-0.0568843	0.0924495	-0.0650087	-0.0859453	-0.0770376	-0.108827	-0.126211	-0.489618
IL12RB1	-0.392437	-0.00627315	0.159138	0.314928	0.0721789	-0.0688511	0.318634	-0.0114871	0.12468	0.124874	0.386709	0.476365	-0.198123	-0.186483	0.420012	0.259179	-0.0121158	0.112211	-0.135524	-0.0512494	0.375626	0.00816146	-0.0357403	0.124496	0.488933
GTF2A1L	-0.0455617	0.0875269	0.0480747	0.0454883	-0.0435283	-0.0845746	-0.638678	-0.057109	-0.0304554	0.0699486	-0.0976328	0.181652	0.207958	0.176621	0.114306	0.205446	0.187712	0.264105	0.746548	0.0445701	0.18387	0.109684	0.00109698	0.109277	-0.00168041
TRPV3	-0.2309	0.147631	0.0473479	-0.0246261	-0.0230649	-0.231137	-0.46321	0.0459401	0.444072	0.166163	0.00632912	0.0361055	0.24024	0.268527	0.205847	0.344578	0.24146	0.350582	0.656751	0.0963924	0.133527	0.137583	0.123332	0.156894	0.201595
CNBD1	0.00759342	0.0338944	0.013156	-0.0141891	-0.0272661	-0.0225621	-0.635505	-0.053172	-0.0269587	0.132748	-0.0103116	-0.0156218	0.189007	0.187437	0.0664576	0.172507	0.150949	0.189827	0.713672	0.0599845	0.0760069	0.0521304	0.0388454	0.0968238	-0.100005
ABCC12	-0.0449727	0.117153	0.0817661	-0.0394546	-0.0756468	-0.0724002	-0.682653	-0.0492104	-0.0107504	0.00674625	0.0032001	0.0150489	0.226964	0.21324	0.163525	0.247954	0.232211	0.265263	0.777414	0.0776977	0.131085	0.0893683	-0.00270042	0.0889655	-0.0296211
MMP21	-0.0166702	0.0677242	0.00962023	-0.0615918	0.0311635	-0.0274156	-0.738112	0.035355	-0.0491342	0.0261516	-0.02868	0.00451152	0.164422	0.145787	0.106575	0.173539	0.133399	0.187939	0.757443	0.0494593	0.118854	0.0528627	0.0546409	0.0681019	-0.052541
TMEM190	0.081852	-0.0451731	-0.0503766	-0.0637261	0.0121104	-0.0490397	-0.050688	-0.0848872	-0.0869135	0.0260791	-0.0701604	-0.0530617	0.0645591	0.0588125	0.00165129	-0.00102748	-0.0124081	0.0303444	0.138722	-0.0302105	-0.0254779	-0.0144469	-0.0335412	-0.0455598	-0.191808
GAS2L2	-0.0323335	0.0674173	0.060082	0.0513974	0.0400488	0.0251429	-0.678195	0.01436	0.0368579	0.11721	0.0148097	0.0225899	0.221742	0.30441	0.175508	0.175357	0.173819	0.208374	0.765278	0.03948	0.0919873	0.0484046	0.0713774	0.0420905	-0.0174502
KCNG4	-0.0295453	0.0417664	0.0431822	0.0235249	0.078651	0.0190381	-0.678658	-0.00531595	0.0163699	0.144976	0.000742701	-0.00735353	0.172394	0.250188	0.157817	0.159563	0.157158	0.175708	0.738527	0.0483786	0.07714	0.0401647	0.0554349	0.0388641	-0.048287
PXT1	-0.101165	0.168312	0.0903053	-0.0121764	-0.00135279	-0.0417506	-0.676056	-0.0180797	0.00923099	0.0981639	-0.00336939	0.0343059	0.319928	0.275023	0.274521	0.402126	0.312011	0.444146	0.918541	0.0618263	0.181662	0.199823	0.00661932	0.127608	0.0562925
CACNG5	0.0281889	0.0672671	0.00607723	-0.0262448	0.0248902	0.0443094	-0.609997	0.0186544	-0.0490815	0.113683	-0.130393	-0.0320911	0.720639	0.328503	0.0728533	0.223767	0.185528	0.184162	0.716792	0.0511806	0.0585698	0.0544519	0.0710167	0.0306301	-0.118551
LINC00308	0.005812	0.0927808	0.0724573	-0.0713207	-0.0233814	-0.0434159	-0.889969	-0.0256254	0.00039781	0.115071	-0.0655635	0.00689089	0.235185	0.267661	0.157959	0.170083	0.198602	0.224917	0.935314	0.0702661	0.122752	0.0748758	0.0411904	0.0458196	-0.100949
WFDC11	-0.0173375	0.0511084	0.0601509	0.0609088	0.0748959	0.0504452	-0.661959	0.0302908	0.0479237	0.131046	0.0156059	-0.00170462	0.173557	0.282842	0.160287	0.133902	0.159208	0.145174	0.737555	0.0413299	0.0905418	0.0493651	0.0879972	0.0346206	-0.0216321
JAK1	0.372142	-0.0799429	-0.0274307	-0.114426	-0.23652	-0.196737	-0.662946	-0.280684	-0.276736	0.0220897	-0.185564	0.0311198	-0.184	0.141717	0.0260939	0.0321041	-0.230812	-0.269697	0.38439	-0.148521	0.0708724	-0.193676	-0.0665685	-0.0986454	-0.440267
CDC42SE2	0.800786	-0.273368	-0.249348	-0.206608	-0.339712	-0.291708	-0.113306	-0.343461	-0.313882	-0.225819	-0.307754	-0.102243	-0.0439738	0.0377534	-0.169919	-0.204214	-0.0796399	-0.274653	-0.109016	-0.0118076	-0.248236	-0.302071	-0.188408	-0.294065	-0.800395
ACACB	-0.229375	0.116409	0.00137757	-0.000830797	0.141003	0.0828832	-0.227696	0.0801746	-0.00835281	0.257363	-0.0074212	-0.182396	0.230085	0.225759	0.196734	0.347616	0.19533	0.351133	0.443791	0.326517	-0.0666489	0.108945	0.121558	0.130573	0.137409
RFWD2	0.397847	-0.165006	0.0151077	-0.0409945	-0.238953	-0.0239123	-0.137915	-0.110894	-0.113145	-0.136952	-0.342029	0.00187524	-0.158575	-0.0146411	-0.30799	-0.420497	-0.533761	-0.588438	-0.142618	-0.0278562	0.0118083	-0.20573	-0.157121	-0.00485563	-0.48961
STX6	-0.423623	0.188496	0.11955	0.360489	-0.139632	0.0311173	0.577584	0.0960475	0.12109	0.0413363	0.294973	-0.114652	-0.241567	-0.278343	-0.13172	-0.0686824	-0.00582672	-0.176705	-0.485767	-0.0322255	0.319934	0.228093	0.259336	0.123534	0.504748
ANLN	0.335902	-0.00585716	-0.379734	0.188655	-0.246166	-0.100316	0.0687522	-0.118498	-0.169292	-0.310522	-0.248038	-0.422302	-0.346331	-0.128746	-0.121855	0.00326331	-0.0846027	-0.411487	-0.219793	-0.0356309	0.0144614	-0.120324	0.062669	-0.0337787	-0.277462
SPRR4	0.0222879	-0.0781207	-0.0608509	-0.0629898	-0.0378572	-0.0514155	-0.473254	-0.0931049	-0.0820983	-0.0078129	-0.0687662	0.0496543	0.149037	0.320779	-0.0234745	-0.040148	-0.0305625	-0.0389562	0.249554	-0.0871144	-0.0554863	-0.205755	-0.0584861	-0.105887	-0.167917
HSH2D	0.222626	0.124925	-0.0902853	-0.127516	-0.0865711	0.0834043	0.0399303	0.448724	-0.0938822	0.0659696	-0.108433	-0.0534401	0.0481895	-0.0364792	-0.128075	-0.0949277	-0.0920116	-0.124954	-0.000985043	-0.0659819	-0.12062	-0.122642	-0.117645	-0.115021	-0.158943
TRNT1	0.324759	-0.222352	-0.0947072	-0.211182	-0.079311	-0.14598	-0.332802	-0.17084	-0.237626	0.0299738	-0.229637	-0.164662	-0.16891	0.0400309	-0.152414	-0.151015	-0.205052	-0.210635	0.0740509	-0.180338	-0.102773	-0.234131	0.236469	-0.209792	-0.436955
TMEM163	-0.186122	0.106343	0.0814146	-0.070666	0.0730919	0.0697863	0.240854	0.0704651	-0.222267	-0.154568	-0.123403	-0.0023872	-0.178015	0.201263	-0.155756	0.234602	-0.103467	0.114295	-0.10221	0.25011	0.00321742	0.356055	0.262708	0.151888	0.181766
ARHGAP5	0.0963968	-0.0981284	-0.0651615	-0.038935	-0.091441	-0.043894	-0.837729	-0.135145	-0.17719	-0.0492225	-0.109846	-0.0748018	0.0428449	0.208835	0.0213583	-0.0760916	-0.0351754	-0.063848	0.591209	-0.0980321	0.193253	-0.0976546	-0.0240031	-0.101263	-0.256207
HERPUD2	-0.17733	-0.0101428	0.0789901	0.0388888	0.076243	0.120573	-0.776479	-0.0280775	0.109199	0.211938	-0.0350356	0.125216	-0.0455924	0.0675126	0.0676153	-0.0938384	0.00838717	-0.0216541	0.542685	-0.086553	0.0740077	-0.21667	0.01776	-0.0389869	0.0421593
JMJD6	-0.00836782	0.178034	0.079734	-0.101188	-0.0883489	-0.132599	-0.712602	-0.0138322	-0.00985888	0.0568297	0.0250589	0.0276538	0.334909	0.272205	0.291655	0.377026	0.336574	0.416765	0.955454	0.119545	0.175153	0.191598	0.0123469	0.126712	-0.0203998
SRCAP	-0.170855	-0.0227011	0.00612103	0.00048635	0.00771419	0.0319122	-0.14762	0.700183	0.0263673	-0.0197829	0.062329	0.598863	0.0142533	0.0184968	-0.0258212	0.000397909	-0.00233082	-0.00828381	0.196296	-0.0305043	0.00347794	-0.00113531	-0.0076567	-0.0259493	0.192417
MAP3K6	-0.0263368	0.0288334	0.0493861	0.0624064	0.0637811	0.00544723	-0.562647	0.0181729	0.0188703	0.107829	0.0217443	0.00834239	0.150757	0.25488	0.0961775	0.09495	0.123428	0.131022	0.593244	0.0160436	0.0760113	0.0483189	0.0779378	0.0198116	-0.00475073
ARSG	-0.281773	0.0249358	0.220247	-0.019748	0.0553472	0.536129	0.108203	0.0343753	-0.0767583	-0.0196008	0.207317	0.0352427	-0.0894795	-0.0687339	-0.0860175	-0.0364368	-0.0403019	0.0865512	-0.0412087	-0.0260065	-0.178217	0.0262246	-0.0453923	0.684433	0.264364
ZNF101	-0.473385	0.0745916	0.136336	0.0418741	0.151537	0.178112	0.605587	0.142406	0.170139	-0.03228	0.314106	0.251326	-0.236202	-0.272215	-0.0565807	-0.0744247	-0.0166609	-0.144118	-0.461797	0.0701057	0.231428	0.335208	-0.0513091	0.136875	0.541402
PTPN11	0.00620055	0.157687	0.0914515	-0.0667688	-0.0476687	-0.090393	-0.76111	-0.0449039	-0.00622564	0.0488595	-0.0403244	0.0159803	0.333576	0.27672	0.273454	0.367668	0.315727	0.387634	0.966876	0.0976074	0.162574	0.155443	0.0213231	0.110161	-0.043318
KLHDC7B	-0.116334	-0.082143	-0.0795042	0.759795	-0.132718	-0.0456002	0.0410413	-0.0943494	-0.116698	-0.120589	0.326473	0.0374079	-0.0949058	0.189328	-0.138572	-0.133581	-0.106875	-0.100421	-0.160166	-0.0963537	0.014308	-0.0825849	-0.073045	-0.0734605	0.062829
ZNF626	-0.0150222	-0.0389524	0.0270492	-0.0514082	0.0128057	0.0262043	-0.625912	-0.0250656	-0.0620843	0.0524489	-0.0207845	0.00697182	0.0800627	0.23589	0.0203622	0.0369009	0.0668485	0.0873388	0.566227	0.0476357	0.046465	-0.0420442	-0.0165377	-0.0349697	-0.152944
PHC3	-0.428007	-0.0727106	0.150012	0.518714	-0.0356612	0.0486024	0.142865	0.0817434	-0.0126673	-0.187776	0.283971	0.0255942	-0.242942	-0.296589	0.100387	0.0649233	-0.155917	-0.0902788	-0.151544	0.281117	0.369892	-0.072774	0.490874	0.228957	0.478985
IL11RA	0.137842	0.0408807	0.00663583	-0.0232592	-0.0222974	-0.0345283	-0.597901	0.0144486	0.056811	0.062649	-0.133682	-0.0263274	0.212687	0.357893	0.110356	0.156586	0.164589	0.176598	0.695943	0.0484681	0.0676442	0.0370162	0.0572694	0.0219906	-0.154285
TNFRSF10A	0.140839	-0.114742	0.244248	0.112295	0.0409021	0.332761	0.483809	-0.047575	-0.198484	-0.0522765	-0.121695	-0.0259445	-0.211644	-0.327317	-0.253325	-0.0849103	-0.214163	-0.0983895	-0.50977	-0.171897	-0.189672	-0.209602	0.188636	0.103231	-0.00915063
HPS4	0.203132	-0.46956	-0.175359	-0.0951474	-0.062054	0.254979	0.487103	0.101227	0.138535	0.138996	-0.0372712	-0.129027	-0.0134632	-0.0179888	-0.0873812	-0.206787	-0.254511	-0.0649866	-0.459197	-0.10465	-0.167726	0.0795979	-0.0790957	-0.196244	-0.203649
UHMK1	-0.0231536	-0.0551222	-0.0462321	-0.0610476	-0.0390441	-0.0461425	-0.682263	-0.104162	-0.0666925	0.00292132	-0.0813831	-0.0702257	-0.00681538	0.0754107	0.00726499	0.0510914	-0.0147077	-0.0437252	0.446168	-0.0797086	-0.00436371	-0.102558	-0.0229841	-0.0837884	-0.124082
TXNDC2	0.117727	0.0113001	0.00507201	-0.00397814	0.0156073	-0.0126431	-0.68036	-0.0200046	-0.0132797	0.068031	-0.0182993	-0.00747016	0.189033	0.461463	0.109727	0.105702	0.123401	0.115795	0.68796	0.0324702	0.0543654	0.0145226	0.0473234	-0.00138301	-0.184015
NAV3	0.0144816	0.137718	0.0965091	-0.116842	0.00519045	-0.177769	-0.773874	-0.0319925	-0.0490442	0.0600955	0.00473257	0.0204955	0.278341	0.275941	0.154258	0.283362	0.261643	0.33986	0.935418	0.108072	0.169184	0.157186	-0.016449	0.114401	-0.0622289
C5orf22	0.00899336	-0.0295778	-0.0479133	-0.062849	-0.0457537	-0.0634574	-0.509802	-0.0912565	-0.0602874	-0.0186711	-0.10344	-0.0923874	-0.0120019	0.0408759	-0.00624851	-0.0196881	-0.0179261	-0.0430176	0.325725	-0.0782931	-0.00801635	-0.0753805	-0.0242951	-0.0717181	-0.123546
PCDHGB7	0.00344664	0.0307005	0.0287339	-0.0460315	-0.00631693	-0.0367465	-0.947795	-0.0545768	-0.00340586	0.0556853	-0.0607128	0.0809758	0.173903	0.247846	0.120164	0.127205	0.12521	0.134617	0.899233	0.0204635	0.122587	0.010812	0.0345982	0.0270033	-0.11507
ERC1	-0.0561167	0.0592214	-0.00250057	-0.044041	-0.0353293	-0.0219309	-0.783937	-0.0423582	-0.0516548	-0.0612199	-0.0415212	-0.031023	0.234519	0.221346	0.14451	0.186832	0.198399	0.179086	0.79429	-0.00653229	0.112537	0.0685781	0.0279409	0.0158217	-0.0628019
FLCN	-0.0239389	0.12264	-0.172927	-0.327479	0.0216804	-0.254563	-0.516776	-0.044839	0.0383386	0.0839056	0.117261	0.0343321	0.0233113	-0.00631795	0.149694	0.163666	0.187485	0.145342	0.462465	-0.126487	0.199207	0.0992519	0.212885	-0.0679862	0.0561622
JMJD1C-AS1	-0.265103	0.0009199	0.582145	0.0714146	-0.0751104	0.078237	0.316352	0.0127683	0.403359	-0.109	0.0103804	-0.0675372	-0.0497534	-0.0403257	0.318665	0.0634228	0.41802	-0.0215278	-0.226289	-0.0758802	-0.167664	-0.0419975	0.190806	-0.0742941	0.301431
LRRC7	0.0220874	0.141797	0.0784319	-0.0767832	-0.0645627	-0.0994799	-0.83941	-0.0467063	-0.00109677	0.0308187	-0.0567966	0.0917113	0.295221	0.278127	0.187365	0.28713	0.261356	0.313	0.978237	0.104107	0.161938	0.137033	0.0295212	0.100355	-0.0733651
SH2D3C	0.0293853	-0.0753607	-0.0887699	-0.106881	-0.101291	-0.231506	0.0138057	0.53711	-0.0557764	0.425654	-0.00998147	0.029364	-0.0089083	0.203141	-0.0882353	-0.18948	-0.0842849	-0.0711769	-0.0958167	-0.0695857	-0.199636	-0.0504383	-0.098117	-0.093045	-0.0559002
PPP1R3B	-0.00338662	0.147823	0.146406	-0.147065	-0.053102	-0.00854482	-0.75864	0.00303512	0.0472723	0.12252	0.0077427	0.0298639	0.279311	0.318507	0.214514	0.305503	0.270842	0.341729	0.946303	0.0850619	0.157321	0.166239	0.0357663	0.0917824	-0.0236347
SLC9A7	-0.112743	-0.0220928	0.244333	0.0103565	-0.0203871	-0.117224	-0.516155	-0.113893	-0.115541	-0.0610527	0.260199	0.0824445	0.0384897	0.361606	-0.0105443	0.0292959	0.0212901	0.0367585	0.459713	0.28156	0.132104	-0.0257718	-0.00112701	-0.00786485	-0.0221034
IGSF3	0.00342425	0.0890461	0.0682819	0.00985943	-0.0545086	-0.102016	-0.740542	-0.0313052	-0.00738196	0.0991312	-0.00565955	0.0447764	0.31203	0.261081	0.223646	0.253804	0.247962	0.2608	0.897183	0.0843346	0.153089	0.104908	0.0114589	0.0831195	-0.0653874
RFX6	0.393809	-0.175143	-0.189069	-0.217818	-0.117928	0.0271134	-0.310578	0.127128	-0.175982	-0.0923024	-0.219266	-0.165299	0.319793	0.0497236	-0.0976933	-0.112987	-0.131252	-0.136956	0.198002	-0.152459	-0.151168	-0.175815	-0.167248	-0.204891	-0.468014
DIRC1	-0.0157655	0.0724475	0.0738712	0.0186062	0.0751129	0.0239836	-0.917185	-0.0297881	-0.0118045	0.081699	-0.0606045	0.0159616	0.224436	0.290397	0.138785	0.175006	0.184212	0.209171	0.941253	0.0509674	0.121504	0.0579235	0.0815876	0.0646719	-0.065721
DNAJB7	-0.00345831	0.0256995	0.0202542	-0.00376767	0.0150929	0.0181203	-0.782894	-0.0211937	0.0154426	0.0616132	-0.0423145	-0.0244617	0.153673	0.236345	0.10679	0.105933	0.121252	0.10868	0.727238	-0.00037832	0.0769055	0.0101343	0.0415298	0.00031324	-0.0672636
UCN3	-0.111728	-0.159526	-0.214252	-0.0385041	-0.0499004	-0.113859	0.0763431	0.0107593	-0.0434712	-0.0280661	0.0502043	0.154109	0.0166966	0.289462	-0.00884564	0.598031	0.0189815	0.0293891	0.0309496	0.0443397	0.0286489	0.227892	0.542483	0.0514123	0.156255
DIP2A	-0.135621	0.0558082	-0.0492184	-0.00976916	0.0724266	0.0557559	-0.718702	0.0116483	-0.00381651	0.109278	0.0394616	0.0408009	0.145386	0.255293	0.10825	0.11585	0.130479	0.125439	0.694322	0.0763208	0.0873086	0.021317	0.0382894	0.0752091	0.0136134
USP28	-0.411398	-0.00585592	0.0406853	0.0712664	0.179401	0.010001	0.00675733	-0.104482	0.0967599	0.0387922	0.0925225	0.122332	-0.152336	0.00978372	0.04368	0.0767335	0.0641807	0.0848412	0.163463	0.0723949	0.730541	0.136559	0.125236	0.454693	0.403669
CASC5	0.00230251	0.10186	-0.154428	-0.137866	0.058653	-0.0800268	-0.419205	-0.0499549	-0.128296	-0.0966339	-0.113205	-0.17051	-0.106335	-0.0642737	-0.0985117	-0.0596253	-0.107613	-0.123457	0.228402	-0.169529	0.154861	-0.132065	0.17773	0.150446	-0.0520392
SENP8	0.242556	-0.0443221	-0.0437461	-0.0995093	-0.0495301	-0.0720987	-0.642186	-0.103682	-0.0657429	-0.0252525	-0.111237	-0.0917649	0.0602488	0.098967	0.0271998	0.0218832	0.0142471	0.019315	0.510464	-0.0651464	0.0268708	-0.0530261	-0.0162306	-0.0667071	-0.272445
GRHL1	0.0570258	-0.0872785	-0.0542669	-0.0231455	-0.0433795	-0.0363802	-0.530708	-0.0959085	-0.0773553	-0.0197964	-0.1039	-0.0489387	0.0469416	0.355247	-0.0152057	-0.0439208	-0.0138627	-0.048034	0.345664	-0.092823	-0.0479047	-0.0823844	-0.0415871	-0.109754	-0.198999
CNBD2	0.0958132	0.0495168	0.0378024	-0.0249748	-0.0252418	-0.268824	-0.472998	-0.0570272	0.00654481	0.113581	-0.191178	0.161859	0.371498	0.248444	0.12519	0.176653	0.145727	0.142281	0.618564	0.0727935	0.1219	0.0877238	0.014944	0.0469126	-0.156786
CASKIN1	-0.251083	0.169002	-0.0121057	-0.0376107	0.120216	-0.0482315	0.091231	-0.0362163	-0.0234352	0.0119158	-0.00854709	-0.15621	-0.0605622	-0.0266003	0.320454	0.0506677	0.0502492	0.503356	0.121721	0.0437907	0.0501869	0.6328	0.0552667	0.515187	0.343326
CACNA2D4	0.000814102	0.147824	0.0797488	-0.0361444	-0.0687552	-0.0850747	-0.782264	-0.0120609	-0.00767013	0.0636949	-0.0387258	0.0133075	0.31761	0.273934	0.281151	0.329184	0.30933	0.377541	0.970315	0.080922	0.179683	0.155544	0.010076	0.0917163	-0.0417077
ARL11	-0.156155	-0.0231003	0.156206	-0.0367782	-0.0383832	-0.0112012	-0.313418	0.0261735	0.822609	-0.0343478	-0.0918815	0.0780118	-0.00950819	0.00297419	0.00112527	-0.0249925	-0.0137848	-0.0421424	0.259839	-0.0804223	0.0084179	-0.0426504	-0.0404435	-0.0553847	0.122883
SLC2A13	0.255803	-0.0750919	-0.0860965	-0.13268	-0.100983	-0.117952	-0.618215	-0.181771	-0.142152	-0.0561115	-0.164049	-0.0893922	-0.018298	0.0859605	-0.0325289	-0.0424285	-0.0475879	-0.0147313	0.434427	-0.0867222	-0.0266422	-0.142372	0.231497	-0.0461696	-0.321206
NIPA1	0.384311	-0.190971	-0.17241	-0.199195	-0.263622	-0.189645	-0.0451228	-0.23158	-0.273829	-0.185079	-0.201652	-0.140318	-0.0793207	0.22254	-0.183182	-0.134656	-0.161972	-0.187056	-0.142665	0.242754	-0.167157	-0.212286	0.231198	-0.0861337	-0.482652
TUBA3FP	-0.171038	0.0151698	0.0417072	-0.131599	-0.0435288	0.00282022	-0.344746	0.00931262	0.588941	0.010738	-0.167383	-0.0677445	0.077436	0.0660377	-0.0750304	0.0736195	0.0408142	0.0560856	0.370612	0.458871	0.0285585	0.01631	-0.0106879	0.00759877	0.0688064
CARD16	-0.0292461	-0.150566	-0.314783	-0.121648	-0.148187	-0.359967	0.148448	-0.226797	-0.0437167	-0.0300289	0.334216	0.30468	-0.0696248	-0.0747542	0.310184	0.325311	0.0583799	0.0858943	0.0146468	0.1777	0.376857	0.00336987	0.000715511	0.241428	0.0907656
DUSP19	-0.0568699	0.264616	0.169426	-0.0208654	0.00826548	-0.114173	-0.640074	-0.088949	0.00678943	0.218508	-0.00853985	-0.0227148	0.063815	0.0908673	0.217486	0.0518694	0.074115	0.0841531	0.635698	-0.00406657	0.0808527	0.13227	0.0317739	-0.00669455	-0.0113975
CYB5D1	0.199812	-0.0178979	-0.476201	-0.0331441	-0.0519857	-0.0384301	0.385078	0.139551	-0.264883	-0.126172	-0.000680006	-0.152104	0.129778	-0.121704	-0.381389	-0.119177	-0.267481	-0.00127861	-0.349044	0.031277	0.0602106	0.186053	0.0914872	0.0443448	-0.118892
NMNAT2	-0.262469	-0.0217725	0.494938	0.550715	0.067138	0.0615859	0.256883	-0.0173597	0.0203506	-0.107682	-0.0335803	-0.0808305	-0.00531073	-0.18144	-0.118929	-0.101258	0.37452	-0.0760277	-0.246304	-0.0981793	-0.0896592	-0.0980971	0.440124	-0.0493852	0.2901
SLC4A1	-0.0168519	0.0916758	0.0177066	-0.0898417	0.0746364	-0.107572	-0.33442	-0.0660134	-0.0244564	0.0812439	-0.0416416	0.0294866	0.151316	0.175466	0.144555	0.234421	0.159823	0.255061	0.542172	0.0775479	0.0866496	0.114901	-0.00644478	0.0661329	-0.0259722
CREG2	-0.206108	0.61747	0.0312909	-0.0328451	-0.0633063	-0.0390184	0.10442	0.0161997	0.705381	0.211977	-0.0724663	-0.0555509	-0.0716123	-0.103794	-0.0529918	-0.0553599	-0.0399646	-0.0482076	-0.0816939	-0.0760149	-0.0249783	-0.0271764	0.0131126	-0.0396812	0.271553
RXFP1	-0.0373376	0.172884	0.104219	0.0676178	-0.0672509	-0.141391	-0.727433	-0.0369394	-0.00265918	0.0418865	-0.0323996	0.0100649	0.321347	0.275644	0.236452	0.358056	0.32043	0.403595	0.955603	0.121708	0.168819	0.184414	0.0505679	0.127293	-0.000709251
SPEF2	0.0208654	-0.0554074	-0.11931	-0.111375	0.384873	-0.207931	0.112018	-0.0531941	-0.0860794	-0.118251	-0.0390513	-0.106823	0.0551974	-0.0921312	-0.0796765	0.0442095	0.235911	0.020878	0.0194141	0.368459	0.159825	0.402588	-0.0772273	-0.0595059	0.0463416
DTD1	-0.141259	-0.0148259	-0.0547457	-0.0785096	-0.0412569	-0.0326678	0.154233	0.00584505	0.0190224	-0.0521739	0.0691728	0.202276	-0.0620197	-0.0552946	-0.0107334	-0.0161	0.274853	-0.0274106	-0.0235874	-0.0282075	0.803105	0.418544	-0.00936337	-0.0862586	0.250912
CASC4	-0.05868	-0.108944	-0.127508	0.306394	0.414277	0.374084	0.382717	-0.0795414	-0.156069	-0.153384	-0.154309	-0.148518	-0.0761948	-0.0537315	-0.234289	-0.199039	-0.148305	0.109552	-0.384018	-0.112423	-0.171374	-0.0884825	-0.127225	-0.0797609	-0.0669971
FGF1	0.0103739	0.0967213	0.0740195	0.00729018	0.0221161	-0.022671	-0.84648	-0.0291289	0.0103945	0.0783736	-0.0278734	-0.0110174	0.261358	0.300801	0.197819	0.240273	0.232403	0.271797	0.958698	0.0724402	0.13293	0.0909571	0.0573281	0.0634983	-0.0730026
ARPP21	0.00963106	0.0658332	0.0493493	-0.0362655	0.00469719	-0.0308266	-0.87508	-0.0503871	0.00294954	0.0439187	-0.0901597	-0.00925306	0.196796	0.267932	0.136858	0.163983	0.160029	0.177998	0.896477	0.0458337	0.118056	0.0691034	0.0275979	0.0415473	-0.0990125
RHOXF1	-0.116425	-0.0452562	-0.0353465	-0.063572	-0.0261377	0.0327827	-0.0220001	-0.0303634	-0.00595532	0.934936	0.0361808	0.0659138	-0.0459705	-0.0615346	-0.0121413	-0.040064	-0.0296405	-0.0282546	-0.0295549	-0.0718337	-0.0345584	-0.0224034	-0.0764555	-0.0372677	0.0668521
ADAMTS17	-0.110684	0.0728283	0.0298323	0.0777584	0.0583059	0.0459879	-0.578094	-0.0142835	-0.00961588	0.130475	0.0385713	-0.0214645	0.178099	0.303382	0.151763	0.159198	0.169327	0.149586	0.649863	-0.0232571	0.0829788	0.0553202	0.120702	0.159239	0.0373767
DHH	-0.128385	0.101899	-0.0134803	-0.146807	-0.0414782	-0.102298	-0.292757	-0.0159463	0.0370937	0.0192691	0.0491411	0.00536287	0.161204	0.146719	0.146734	0.42321	0.171669	0.178554	0.516448	0.0730434	0.835264	0.169173	0.0697665	0.10416	0.178379
ABRA	-0.0058164	0.121355	0.0943771	-0.0259124	-0.0104146	-0.14609	-0.85976	-0.0493761	-0.0441073	0.08594	-0.00676862	0.0127774	0.272985	0.315053	0.217681	0.303539	0.255992	0.29994	0.974084	0.0945462	0.151666	0.117825	0.0900798	0.0925667	-0.0555055
KLHDC1	0.509119	-0.401028	0.147856	-0.288008	-0.054586	-0.230397	-0.0865998	-0.344462	-0.306528	-0.0755739	-0.037078	0.185092	-0.0565076	-0.0911113	0.0529925	-0.149601	-0.167256	-0.110462	0.00384407	-0.156928	0.142323	-0.102589	-0.157872	-0.138481	-0.507121
RICTOR	-0.148457	0.0417308	-0.0264623	-0.0437967	-0.0769005	-0.121863	-0.0336903	-0.0433223	0.00949807	-0.101641	0.0516582	-0.00844276	-0.0224939	-0.0104622	0.741787	0.0772385	0.621339	0.0745363	0.13228	0.244152	0.139776	0.0192295	0.189459	0.00682383	0.192608
PCDHGA4	-0.295156	-0.148116	0.149838	0.477071	0.389415	0.264328	0.278457	0.180044	0.570086	-0.182769	-0.0058554	-0.076626	-0.160166	-0.207542	-0.100018	-0.296995	-0.069792	-0.133958	-0.332332	-0.14237	0.138598	-0.0518556	-0.0963977	-0.0645155	0.338882
NETO1	0.0433752	0.0939971	0.0407789	-0.0847096	-0.0308458	0.0191313	-0.863282	-0.0510607	-0.0288532	0.0437277	-0.0889459	0.0745919	0.278495	0.292721	0.159466	0.24622	0.222822	0.280296	0.953007	0.0804152	0.136315	0.102689	0.00444274	0.0626671	-0.118679
WWP2	0.00147567	-0.0211086	-0.0237782	-0.0567499	-0.084022	-0.0569213	-0.439074	-0.0743593	-0.0532597	-0.0288141	-0.0736823	-0.0551026	0.0199975	0.0366397	0.000407867	0.0100779	5.27984e-05	-0.0221819	0.287269	-0.0577364	-0.0137524	-0.0755015	-0.0416181	-0.0582711	-0.102142
ST7L	-0.447083	0.00770056	0.0122152	0.431745	0.175435	-0.00816145	-0.0373952	0.132782	-0.0201117	0.0377921	0.260549	0.0509062	-0.135589	-0.123648	0.368082	0.0467078	-0.00938815	0.274552	0.123843	-0.025495	0.390001	0.00861514	0.629001	0.282911	0.511054
C2orf15	-0.172922	0.178926	0.0128646	0.259645	0.0114752	0.00362338	-0.246884	0.15356	0.326529	-0.0444461	-0.0602622	0.54764	-0.0260155	0.00348437	0.0847162	-0.0475953	-0.0237527	-0.0188323	0.322297	-0.107263	0.015245	0.222761	0.0156063	0.0494174	0.180961
KCNH8	-0.214381	0.283212	0.418037	0.146442	0.360023	-0.00696894	0.362616	-0.0292789	0.362932	-0.149904	-0.0965955	0.212443	-0.175296	-0.235338	-0.000541632	-0.143462	-0.133793	-0.0955713	-0.272878	-0.12218	-0.094378	0.32105	0.0788003	-0.0757455	0.325824
MCF2L	-0.0761159	0.184106	0.117737	-0.0172397	0.0342984	-0.0316108	-0.732193	-0.0332836	-0.00340776	0.0946022	0.0136974	0.029585	0.314987	0.274766	0.261757	0.332693	0.318185	0.432217	0.948207	0.0652109	0.168339	0.14489	0.0208662	0.0922116	0.0211393
SLCO6A1	-0.197986	-0.0100435	-0.0045418	0.931718	-0.0515526	0.0250439	0.0195359	-0.013144	-0.0122031	-0.0677703	0.0320501	-0.0306561	-0.0524435	-0.0758653	-0.0457652	-0.0521632	-0.0124154	-0.0213816	-0.0114265	-0.056153	0.250736	-0.00281488	-0.00403826	0.00779943	0.20544
PP2D1	0.00758316	0.0909899	0.0785622	-0.072806	-0.0509398	-0.0822214	-0.886182	-0.0664029	0.00824203	0.0358042	-0.0636607	0.0142287	0.238258	0.310132	0.161142	0.208258	0.204733	0.253906	0.944126	0.0700174	0.180868	0.0722038	0.0792608	0.0657324	-0.0875837
KLC3	-0.0213099	0.0475013	-0.00282322	-0.0108555	-0.105518	-0.284381	-0.159051	-0.0610443	-0.0115524	0.111305	-0.018246	-0.0463175	0.0262271	0.176304	0.394149	0.244143	0.476307	0.545788	0.308428	0.409661	0.0179159	0.249351	0.110172	0.0763053	0.137126
CIB3	-0.0179805	0.0745779	-0.04875	-0.0342191	-0.0307405	-0.0669775	-0.282115	-0.0395684	-0.0485603	0.0182696	-0.00600321	-0.00834425	0.129824	0.146202	0.128976	0.934221	0.156178	0.164678	0.473525	0.0723456	0.0684415	0.0529661	0.0387221	0.0572393	0.0737954
CADM2	0.00410434	0.0265059	0.0358146	-0.0433593	0.00429219	-0.00015412	-0.710316	-0.0438596	-0.00627623	0.0727765	-0.024666	-0.00973112	0.121022	0.215159	0.0834133	0.0958404	0.100121	0.0899115	0.646083	0.0312475	0.0722985	0.00981075	0.0479264	0.0537901	-0.093084
C9orf66	-0.253623	-0.0324097	0.0461176	-0.030277	0.0551516	0.44235	0.205365	0.717914	0.00231776	-0.0947053	-0.0525892	-0.0961363	-0.0672074	-0.104668	-0.0862824	-0.0696605	-0.0768358	-0.0540224	-0.115754	-0.0408588	-0.0153268	0.560206	-0.0489632	-0.0208762	0.306693
HDAC9	0.0252661	0.0775377	0.0721124	-0.0421566	0.00674988	-0.131624	-0.723714	-0.0440941	0.0441003	0.0652248	0.021932	0.0120675	0.190857	0.218582	0.174926	0.191425	0.161384	0.184328	0.756637	0.0729421	0.131027	0.0722947	0.0937449	0.0571019	-0.0597446
SLC16A11	-0.113321	0.0479001	-0.0351385	-0.0275327	0.000769058	-0.0712936	0.031201	0.0222773	-0.00966825	-0.00349386	-0.00812039	-0.0510367	0.0175057	0.0358893	0.0758818	0.0439285	0.0236897	0.0571798	0.110034	0.0270816	0.0855815	0.969464	0.0339673	0.0482935	0.207253
TMEM67	-0.00763438	0.0642498	0.0447946	-0.0343991	-0.0114084	-0.048604	-0.885734	-0.0625548	-0.0175231	0.0487909	-0.0552817	-0.00729362	0.184908	0.235704	0.13687	0.161361	0.167302	0.189886	0.871874	0.0478581	0.125848	0.0444022	0.135628	0.0659191	-0.0815332
HS6ST2	-0.010608	0.0265632	0.0280333	0.00441712	0.0403839	-0.0255837	-0.82383	-0.0443916	0.00253295	0.0614328	-0.036071	-0.0158657	0.156117	0.265151	0.1109	0.101101	0.11762	0.118191	0.785842	0.0124456	0.0893217	0.0292551	0.0342449	0.0275176	-0.0908086
CAMKK1	-0.0383671	0.103018	0.0309571	-0.0955158	0.0320185	-0.113232	-0.748483	-0.0533298	-0.0121949	0.0289782	-0.0063096	0.0090856	0.338268	0.300155	0.248408	0.334731	0.28474	0.474179	0.898967	0.0346884	0.162912	0.142989	-0.014868	0.074109	-0.0356955
ZNF625	0.0342807	0.0718648	-0.0525882	-0.209721	-0.0146565	-0.261542	-0.705993	-0.0403882	0.0784615	0.0877374	-0.130452	0.00033242	0.198681	0.286588	0.160841	0.161607	0.161229	0.164687	0.700873	0.067012	0.0819832	0.203247	0.095874	0.0356029	-0.110536
ZNF563	-0.017336	-0.0698957	-0.0533218	-0.0960536	0.520194	0.164718	-0.725717	-0.0349468	-0.10195	0.0773629	-0.0605721	-0.0459257	0.0653317	0.19916	0.0155158	0.0340814	0.0617425	0.236893	0.642053	-0.019731	0.0388906	0.00185291	-0.00982437	-0.0195844	-0.0765587
LIN9	-0.0741844	0.185305	0.10782	-0.09734	0.0316223	-0.0569332	-0.746079	-0.0095692	0.0033861	0.0203145	-0.0284367	0.0120953	0.327613	0.209169	0.238896	0.343803	0.325642	0.406479	0.958854	0.13921	0.188303	0.200558	0.0475717	0.144034	0.031207
CLEC4D	-0.0278585	0.125696	0.111928	-0.0585236	-0.0296297	-0.0712409	-0.80836	0.124785	0.0164176	0.0337273	-0.0970882	-0.0204268	0.288869	0.316753	0.177343	0.281734	0.254759	0.332232	0.955138	0.0876846	0.150844	0.130423	0.129494	0.0894885	-0.0222322
SLC25A27	0.0121408	0.0850854	0.0598983	-0.0167332	0.0339682	-0.011895	-0.808845	-0.0105642	0.00836312	0.0895463	-0.0163109	-0.00286403	0.227433	0.294034	0.172001	0.197981	0.20909	0.225975	0.869667	0.0780649	0.129089	0.0894206	0.0585161	0.0663819	-0.0686634
GPRC6A	0.0399934	0.162721	0.0777892	-0.108617	0.000345226	-0.114705	-0.648782	-0.0514615	0.0320286	0.00043536	-0.159124	0.00321874	0.368858	0.331546	0.210946	0.399763	0.332978	0.50996	0.895019	0.114613	0.144832	0.174099	-0.0173759	0.109774	-0.0571034
RAET1E	0.00390409	-0.0857792	-0.065115	-0.0145828	-0.0556683	-0.0612509	-0.477488	-0.100271	-0.0868503	-0.03322	-0.110407	-0.0488693	0.0410684	0.41333	-0.0399675	-0.0476434	-0.0384993	-0.0630209	0.28016	-0.0889677	-0.0577151	-0.0798184	-0.043571	-0.11263	-0.188099
SLC44A5	0.0979006	-0.00250571	-0.00618861	-0.0133474	-0.0523897	-0.0474632	-0.747656	-0.0686592	-0.0291833	0.0203865	-0.0896121	-0.053166	0.126157	0.19144	0.0640981	0.073006	0.086421	0.0613332	0.669717	-0.0262757	0.0535759	-0.0203407	0.0150324	-0.0266134	-0.175187
ZNF417	-0.0635908	0.0202933	0.00626812	-0.0653618	0.16265	0.000929293	-0.904424	-0.0911501	-0.0204768	0.0371247	-0.0315164	0.147233	0.170259	0.214819	0.111329	0.120448	0.108206	0.154403	0.85608	0.0204179	0.117592	0.00130019	0.0185344	0.058881	-0.0609471
ZNF781	0.0432632	0.0444848	0.00110506	-0.0785591	0.00377282	-0.0691003	-0.926342	-0.060194	-0.042987	0.0761332	-0.02965	0.0941392	0.23463	0.307667	0.143898	0.141365	0.155394	0.168421	0.906389	0.0612978	0.12032	0.0182506	0.0547481	0.0200239	-0.137269
HELB	-0.322146	-0.119494	-0.0473143	-0.0110854	0.032525	0.50316	0.0820809	0.0715081	-0.0601892	-0.0751426	0.489965	0.269174	-0.123147	-0.137554	-0.084825	-0.11655	-0.0984157	0.10071	-0.0690459	-0.0212399	-0.00587732	0.201455	0.310602	0.315077	0.342796
SEC62	-0.49774	0.00451827	0.119191	0.312038	0.210986	0.135637	-0.313833	0.132527	0.18022	0.170307	0.0958055	0.0858696	-0.147187	-0.244869	0.127962	0.13867	0.0141438	-0.0659755	0.243719	0.207967	0.10164	0.154285	0.0466999	0.204958	0.469129
TRDN	0.0101643	0.0900816	0.0382819	-0.0948048	0.00380581	-0.0609682	-0.925763	-0.0597773	-0.0281736	0.0781989	-0.0637267	0.0130086	0.283789	0.301621	0.152767	0.218084	0.210304	0.25281	0.973935	0.0740166	0.140851	0.0900196	0.0331386	0.0717024	-0.104485
SOCS4	-0.038862	-0.139915	0.116184	-0.00905717	-0.0730118	0.330968	0.259752	-0.0482518	-0.160368	-0.16951	0.022487	-0.15372	-0.17301	-0.208532	-0.178691	-0.156864	-0.161668	-0.155055	-0.304231	-0.122525	-0.00868356	-0.127056	0.613643	-0.0748459	-0.00220314
C8orf31	-0.181167	0.775887	0.165871	-0.0145497	0.0182245	0.399699	0.0532292	-0.00160183	3.95147e-05	-0.0870196	-0.0699426	-0.0853409	-0.0749423	-0.0872927	-0.0446044	-0.0588243	-0.0229754	-0.0153538	0.00808002	-0.0559111	0.298387	0.00896568	-0.0540246	-0.020709	0.236158
ZNF547	-0.0550175	-0.105951	-0.187558	-0.0772089	0.454068	0.715275	-0.0489178	0.137022	-0.0305198	-0.15228	0.163198	-0.0198735	-0.045941	-0.0871202	-0.223069	-0.125985	-0.11896	-0.0135896	0.0330816	-0.0520233	-0.0378714	0.208038	-0.0579167	-0.0184599	0.0873517
SIM1	0.0120285	0.155856	0.0844701	-0.084313	-0.0599695	-0.108084	-0.778852	-0.0521183	-0.0190478	0.0270433	-0.064765	0.00817354	0.319628	0.260828	0.137001	0.339017	0.286362	0.360994	0.964908	0.102879	0.173324	0.161092	0.0445427	0.0989402	-0.0642671
PROM2	0.284566	0.035983	0.106268	0.151668	-0.0188282	-0.0600462	-0.33037	-0.546886	-0.535035	0.0744203	-0.219675	-0.244509	0.232154	0.230034	-0.265315	0.0141131	-0.400238	0.0318454	0.235107	0.0453516	-0.0817424	-0.0500642	-0.0432841	0.0798104	-0.43797
TLR4	-0.121951	-0.0543326	-0.0377462	-0.0553328	-0.028678	0.0805124	0.126896	-0.00924222	0.0123411	0.912564	0.0444615	0.315938	-0.0739635	-0.108093	-0.0460042	-0.0639339	-0.0730065	-0.0527686	-0.14846	-0.0794686	0.0214074	-0.0356482	-0.0941612	-0.0523042	0.102185
TSNARE1	-0.129975	0.00966212	0.0122983	-0.0100872	-0.0471334	-0.0264755	0.0412604	-0.00788584	-0.0214589	0.0133964	-0.0419628	-0.0783778	-0.0319411	-0.00579393	-0.00411961	0.0283311	-0.00739588	0.0197338	0.057073	0.197366	-0.0194957	0.00324298	0.0410498	0.96551	0.150271
CAPN13	-0.0550281	0.0513934	0.0331669	-0.0438561	0.024663	-0.0332504	-0.456185	-0.0446367	-0.00895356	0.0967856	-0.0354196	-0.0198672	0.11639	0.155063	0.135851	0.177411	0.126509	0.182666	0.595233	0.0694076	0.050944	0.040763	0.0384461	0.337541	-0.0130505
STMN1	-0.155118	0.0392041	0.00552288	0.0161471	0.165019	-0.0108476	-0.521037	0.00382741	0.0161536	0.0355687	0.393978	0.0853212	0.105577	0.193686	0.104235	0.0821092	0.185636	0.117414	0.569034	0.00289575	0.191615	0.0877596	0.0564102	0.0386109	0.136953
SIGLEC10	-0.0127048	0.108061	0.0806272	-0.0243255	-0.0114278	-0.0492673	-0.639167	-0.0287679	0.00513672	0.110663	-0.0064518	-0.00141773	0.229479	0.278723	0.178817	0.218297	0.238444	0.578063	0.796816	0.0735179	0.11265	0.0823745	0.0670605	0.0766558	-0.000855122
RFX4	-0.0147173	0.0448729	0.0103934	-0.0682138	-0.0528678	-0.0827271	-0.644446	-0.0739587	-0.0375302	0.09044	-0.0454932	0.0206107	0.171263	0.153519	0.101494	0.134664	0.121626	0.25407	0.629965	0.00670223	0.066022	0.0166929	-0.0165554	0.00333175	-0.0634967
WFIKKN1	-0.0234957	0.184467	0.0489692	-0.109314	-0.116997	-0.175327	-0.67694	-0.102164	-0.00823715	0.19604	-0.0184885	0.0638051	0.346463	0.405778	0.313875	0.351605	0.311236	0.413918	0.906486	0.180138	0.163964	0.20076	-0.0566156	0.107867	-0.04055
SENP1	-0.163419	-0.101544	-0.10713	-0.0761514	0.493804	0.301614	0.148815	-0.0121899	0.0385511	-0.126373	-0.079298	0.105549	-0.0899523	-0.0628974	-0.131221	0.0387045	0.493642	-0.0590707	-0.181498	-0.0927514	-0.141357	-0.0811788	-0.111601	-0.0906041	0.113891
KLF14	-0.0031234	0.132957	0.03647	-0.150403	-0.0381538	-0.146932	-0.718449	-0.0569759	-0.0845623	0.0330567	-0.0175574	0.0276694	0.363512	0.515258	0.257437	0.39302	0.29937	0.389105	0.923813	0.0929559	0.137589	0.177932	0.027408	0.0975113	-0.0785107
NXNL2	-0.0260594	0.000737526	-0.00524508	-0.0452191	-0.0282242	-0.0496894	-0.508934	-0.0718753	-0.0380575	0.0192403	-0.0223359	0.0373944	0.107898	0.10474	0.0615068	0.0591515	0.0510316	0.067449	0.438442	-0.00800749	0.0562466	-0.0176563	-0.0139708	0.0477474	-0.0467078
BRS3	-0.0752848	0.196075	0.123637	0.00687448	-0.0644962	-0.0444162	-0.692071	-0.0253188	0.0323692	0.0327804	0.0115169	0.0201128	0.334999	0.250974	0.274078	0.382341	0.346288	0.425814	0.947924	0.119091	0.176395	0.191573	0.0643814	0.140453	0.0483886
TMX3	-0.214184	0.038902	0.543451	0.0969719	0.11016	0.497442	-0.504218	0.0430428	0.00820434	-0.0682206	-0.126145	-0.0740865	0.0577743	0.0957825	0.0110167	0.0350184	0.0735568	0.0604661	0.527455	-0.0243977	0.237317	-0.000180088	0.0354811	0.0659017	0.131869
ZNF396	0.273066	-0.155569	-0.0973441	-0.239538	0.34313	-0.178128	-0.133056	-0.193194	-0.112672	-0.0837119	-0.19145	-0.120477	0.332538	-0.00374044	-0.125958	-0.0939909	-0.0953179	-0.0679309	0.128831	-0.116599	0.101971	-0.08566	-0.076672	-0.131393	-0.402232
SLC26A7	0.0120032	0.0503861	0.0533651	0.0222897	0.0488204	0.0044406	-0.785253	-0.0283308	0.0101368	0.120393	-0.0414553	0.0232297	0.176856	0.242043	0.136247	0.137517	0.14383	0.156711	0.787545	0.055302	0.128477	0.0429093	0.0697327	0.0384943	-0.0780949
SNX18	-0.0597705	0.16933	0.094979	-0.0103911	-0.0420122	-0.128044	-0.715864	-0.0342041	0.0489401	0.0715237	-0.014447	0.02139	0.358313	0.288123	0.252488	0.39625	0.329785	0.419854	0.955341	0.11292	0.169691	0.170658	0.0288831	0.121077	0.0133344
0	-0.10266	-0.166318	-0.157146	0.381272	0.468609	0.14539	0.105655	-0.11794	-0.179786	-0.122435	-0.135894	-0.107809	-0.0501883	0.388317	-0.196113	-0.15041	-0.155753	-0.11243	-0.234848	-0.121753	-0.179936	-0.117413	-0.126248	-0.114536	-0.114479
FBXO39	0.190486	0.0942431	0.0262668	-0.132568	-0.145243	-0.369794	-0.525102	-0.0772618	-0.0688187	-0.0150471	-0.052902	-0.00399063	0.24836	0.235905	-0.166482	0.212612	0.18891	0.231454	0.698674	0.11164	0.125619	0.115457	-0.000827023	0.278028	-0.202512
B3GNT6	-0.0905676	0.108309	-0.000880425	-0.0337621	-0.0801878	-0.141845	-0.481821	-0.103334	-0.00719311	0.0485504	0.0468353	0.065456	0.210629	0.21595	0.814563	0.372117	0.251022	0.280883	0.648017	0.05407	0.0791489	0.0806475	-0.0340249	0.083202	0.0439253
DENND1B	-0.115881	0.836861	0.0534485	-0.084436	-0.0151303	-0.0471009	-0.321573	-0.0267372	-0.0194309	-0.0368273	-0.0892983	-0.0364243	0.126139	0.15591	0.127338	0.149156	0.173948	0.204887	0.497625	0.0691203	0.145523	0.102656	0.0485371	0.0706991	0.132077
ZNF619	-0.192155	-0.020738	-0.0462631	-0.0138936	-0.062447	-0.0781055	0.1637	-0.00602086	-0.0459303	-0.0648721	0.00786483	-0.103994	-0.0707017	-0.0924272	-0.0749279	-0.0107804	0.0163882	-0.0441944	-0.109794	0.477968	0.0581206	0.421017	0.740395	0.0622739	0.248573
ICK	0.0291973	0.096749	0.0543294	-0.0527696	-0.0227006	-0.0739701	-0.910004	-0.0600934	-0.00185631	0.0558748	-0.0664025	0.0205456	0.251669	0.287469	0.161955	0.224882	0.212814	0.248624	0.973	0.0813319	0.157434	0.0919685	0.0427633	0.103194	-0.095177
FAM71D	-0.0268545	0.14441	0.084614	-0.071306	-0.0296621	-0.078325	-0.661924	-0.0435553	-0.0152993	0.0283998	-0.0527709	0.00796708	0.264385	0.218109	0.154388	0.374989	0.242872	0.330529	0.87194	0.112087	0.140827	0.119907	0.0711869	0.197148	-0.0134916
BCL2L14	-0.0304348	0.110197	0.0657537	-0.0108742	0.0341641	-0.0806263	-0.700383	-0.0361815	-0.0220653	0.115624	-0.000281379	0.00581811	0.250912	0.225477	0.213635	0.260302	0.237102	0.291709	0.862799	0.0851416	0.126806	0.127314	0.0140705	0.0854857	-0.0387566
HS6ST3	-0.00119774	0.154406	0.0737448	-0.0712571	-0.0407884	-0.0946471	-0.800397	-0.0229929	0.0059288	0.0917276	-0.0356803	0.0288052	0.311747	0.305805	0.211921	0.30927	0.298598	0.350537	0.960899	0.119403	0.173748	0.161539	0.0189799	0.107614	-0.0450137
SLC26A1	-0.00618828	0.137639	0.0703635	-0.0376845	-0.0108849	-0.0479419	-0.826971	-0.0380261	0.0102668	0.0688499	-0.0409064	0.00809307	0.296784	0.295033	0.198341	0.290365	0.35355	0.335528	0.979376	0.105175	0.136024	0.143972	0.04966	0.109294	-0.0403527
CLDN15	0.0421869	-0.116592	-0.161842	-0.155162	0.11587	0.468065	0.343197	0.519735	-0.0525968	-0.176693	-0.0963001	-0.102535	-0.151683	-0.234946	0.247966	-0.136668	0.126716	-0.141342	-0.342044	-0.128821	-0.159939	-0.102978	-0.164273	-0.141468	0.0363363
RAB42	-0.295828	-0.0659411	0.11065	0.304892	-0.0237897	0.20659	0.13659	-0.00875041	-0.110744	-0.110063	0.795154	0.447073	-0.157141	-0.162621	-0.130571	-0.121347	-0.102568	-0.0885967	-0.190257	0.0622403	-0.0403525	-0.0566556	-0.0884857	-0.0400229	0.278236
PTCHD1	-0.0608195	-0.0843377	-0.093508	-0.0779054	0.0780351	0.881734	0.195412	0.0631258	-0.0791246	-0.0188318	-0.112838	-0.0967037	-0.103333	-0.160002	-0.117745	-0.116601	-0.0321705	-0.0995359	-0.247852	-0.0955072	-0.135455	-0.0978018	-0.00275692	-0.0754234	0.00640042
M1AP	-0.0236097	0.079387	0.0590479	-0.0106971	0.0304945	-0.00367629	-0.829596	0.121022	-0.0303202	0.0997773	-0.0898716	-0.0217774	0.22161	0.292957	0.185943	0.208936	0.196158	0.248853	0.91159	0.08065	0.144568	0.0991177	0.0764717	0.131255	-0.0329897
ZSCAN4	-0.243379	0.0518743	0.545909	0.537539	-0.0279855	0.29561	-0.119283	-0.0146779	-0.0172108	-0.0831687	-0.0880823	-0.0938625	0.00175117	-0.00704905	-0.0330071	0.025009	0.0497638	0.0892759	0.272056	-0.0223038	-0.00649939	0.247603	-0.0164328	0.391046	0.241832
VWA5B1	-0.0983685	0.0425108	0.031613	-0.00241927	0.0487393	-0.0144392	-0.264848	-0.0277905	-0.0107822	0.0921956	0.129606	-0.0162858	0.0646572	0.105443	0.13012	0.421647	0.134969	0.640501	0.438289	0.145877	0.0310855	0.0311853	0.0402806	0.0601632	0.108174
LINC00311	0.0150184	0.0583787	0.0492129	0.00383168	0.0579023	-8.50231e-05	-0.656596	-0.0225301	0.00729291	0.0642182	-1.31987e-05	3.85046e-05	0.156645	0.206576	0.119238	0.125543	0.144514	0.152137	0.663463	0.0608237	0.100712	0.0613765	0.0539936	0.0399721	-0.0595496
HTR6	-0.0111548	0.152741	0.0780133	-0.0568797	-0.0247273	-0.0685593	-0.800898	-0.0381732	0.00124111	0.0640598	-0.0328272	0.00207968	0.313	0.294314	0.22132	0.324201	0.270717	0.363811	0.961789	0.0816597	0.160836	0.164776	0.0387916	0.110201	-0.0387299
MAGEB6	-0.0091356	0.0253948	0.0311894	0.0150519	0.0211361	-0.0246481	-0.887724	-0.0736398	-0.00550959	0.073686	-0.0203848	0.0798286	0.18008	0.227129	0.0981265	0.0983941	0.12745	0.140308	0.835005	0.0160287	0.130863	0.013866	0.0470101	0.00584273	-0.0938728
RUSC1-AS1	-0.261314	0.701418	0.0906438	-0.0179137	0.0500811	-0.0459587	0.111512	-0.0392413	0.2078	-0.0645893	0.199436	-0.0915991	-0.108516	-0.124929	-0.061488	-0.0491967	0.0945159	0.362927	-0.0555704	-0.0648032	-0.00374159	-0.0272192	0.283075	-0.00893393	0.363451
CACNG6	0.351754	0.0491796	0.0139449	-0.0457949	-0.0352585	-0.105435	-0.576252	-0.136996	-0.53026	0.0482988	-0.0901463	-0.0396072	0.224494	0.185403	0.0822131	0.0970963	0.150737	0.157197	0.520272	0.0989358	-0.501808	-0.0453058	0.0514283	-0.233802	-0.425442
LMNTD1	0.00849778	0.135365	0.0679595	-0.0585346	-0.0569818	-0.0977107	-0.646435	-0.0193491	0.012064	0.137111	-0.229908	-0.0209116	0.399429	0.359676	0.290914	0.316422	0.305938	0.399621	0.893056	0.060653	0.194196	0.143604	0.0575612	0.069303	-0.0860069
CIRBP-AS1	-0.307519	0.121933	-0.0167949	-0.0333449	0.413474	0.00326262	0.172516	0.0434783	0.367267	-0.062868	-0.082014	-0.146578	0.201122	-0.0549229	-0.0704715	-0.0264149	-0.0391991	0.0101993	-0.0483821	-0.0423868	-0.0141373	0.424331	0.259902	0.62721	0.382567
AXDND1	0.638697	-0.240132	-0.246261	-0.301868	-0.210589	-0.138991	-0.223432	-0.322221	-0.293481	-0.176219	-0.346051	-0.255354	0.305372	0.141362	-0.165602	-0.087801	0.0475237	0.0204318	0.144055	-0.197315	-0.249131	-0.269566	0.0330089	-0.275951	-0.748751
ASMTL-AS1	0.0602673	0.0650364	-0.112906	-0.152414	0.0176432	-0.377133	-0.446172	-0.0513684	0.0401924	0.159223	-0.0512995	0.0211825	0.163607	0.319582	0.401739	0.178324	0.17913	0.526921	0.602417	0.0939896	0.0772558	0.117417	0.0774053	0.0564391	-0.0731004
CD200R1	0.0234059	0.0498564	0.0497362	-0.129601	-0.0891249	-0.0922258	-0.782043	-0.0902158	-0.0387392	0.103197	-0.0707119	0.0167714	0.158052	0.214428	0.141742	0.16622	0.131357	0.171492	0.799308	0.0418678	0.125569	0.0260339	0.0181949	0.0537934	-0.129476
LINC00334	-0.0403511	0.0721709	0.033087	-0.067381	-0.0430124	-0.089574	-0.731745	-0.0273871	-0.0230557	0.0144637	-0.0353344	0.0925987	0.211106	0.192789	0.143012	0.189162	0.184584	0.234529	0.749336	0.0373554	0.132024	0.0950532	0.0284267	0.050523	-0.0243662
ATOH7	-0.0112812	0.116987	0.0551401	-0.101365	0.0239136	-0.101913	-0.828515	-0.0561725	-0.01833	0.0217753	-0.0377923	0.0181971	0.277106	0.253987	0.193353	0.279174	0.251473	0.32204	0.932063	0.0827106	0.157694	0.156395	0.0176284	0.0857243	-0.0426015
SEC16B	0.0165248	-0.00667353	-0.0159889	-0.0756437	-0.0807254	-0.0791066	-0.639858	-0.0975083	-0.0529652	-0.00525525	-0.107239	-0.0783639	0.071448	0.113887	0.0264733	0.0532264	0.0510705	0.0356226	0.50046	-0.0454579	0.0294453	-0.032098	-0.0151566	-0.042684	-0.130329
AMER1	0.0909059	0.0790084	-0.00611648	-0.0753974	-0.131394	-0.0996041	-0.753217	0.0196553	0.0552432	0.127892	0.00882103	0.0215763	0.252866	0.248124	0.221871	0.216098	0.225479	0.198554	0.86006	0.0802961	0.142532	0.0782586	0.0070645	0.0437099	-0.098032
NKX6-3	-0.125262	-0.0139364	-0.0275056	-0.0831945	0.00199526	-0.104554	-0.0525264	0.0304516	0.0178027	0.0384497	0.0673914	0.825377	0.0230163	0.0530784	0.06113	0.175674	0.0757391	0.220903	0.193388	0.00226511	0.388804	0.05316	0.00178388	0.0267736	0.174953
TBATA	0.0795535	0.021716	0.0226642	0.0226292	-0.0443649	-0.0720795	-0.666853	-0.0437005	0.0119187	0.124572	-0.0920456	-0.0309029	0.195025	0.317385	0.144484	0.118732	0.143636	0.119629	0.729315	0.0275084	0.0681609	0.0196105	0.0597527	-0.00395492	-0.176738
EXOC3L2	0.191949	0.0729589	0.0667683	-0.0117001	0.0841737	-0.077578	-0.470097	-0.00578719	0.0220821	0.105594	-0.187331	0.0832273	0.179816	0.331664	0.0340559	0.094512	0.202308	0.323269	0.428956	-0.0608749	-0.450813	-0.134321	-0.0229845	-0.410627	-0.256415
CABP4	-0.00452985	0.131232	0.0537229	0.0518221	0.0129074	-0.1416	-0.781413	-0.0994157	0.0539769	-0.0178671	-0.134284	-0.0231724	0.336942	0.377174	0.150949	0.333694	0.259283	0.380262	0.942071	0.080294	0.1525	0.167062	0.127919	0.113624	-0.0455366
TNFRSF13C	-0.0720318	-0.0293641	-0.0310324	-0.0524651	0.00747603	0.257497	-0.444401	0.0123904	-0.0517396	0.00902794	-0.0901269	-0.0774494	0.124861	0.257076	0.0375266	0.0405114	0.0499888	0.0598085	0.434456	-0.0184782	-0.00552615	-0.0259211	0.343509	-0.0203101	-0.059404
CAMK2N2	0.00877097	0.052198	-0.0642669	-0.0846841	-0.0271464	-0.117646	-0.798356	-0.0526217	-0.0761206	0.0428687	-0.0453911	0.0357385	0.438552	0.361314	0.203997	0.280606	0.227977	0.282906	0.905988	-0.0495386	0.13648	0.0895152	0.011443	0.0429581	-0.151004
ANKRD30BP2	-0.0513904	0.107103	0.0461905	0.17508	-0.0215505	-0.0785361	-0.855015	0.00658268	0.0106443	0.0507246	-0.0306667	0.0111314	0.254045	0.241093	0.148603	0.237699	0.220799	0.275912	0.944812	0.0322228	0.164186	0.114345	0.0484196	0.087316	-0.0127744
KCNG3	-0.265547	-0.0114848	-0.0575529	-0.0316746	0.0140504	-0.0915976	0.0691467	-0.0391005	-0.06356	-0.0758211	0.835778	0.1291	-0.085482	-0.101432	-0.0705112	-0.0128717	-0.024593	0.0171583	-0.00569261	0.353477	0.492608	0.0633202	0.12108	0.0638693	0.31241
LINC01312	0.0939189	0.00508081	-0.0529734	-0.142973	-0.115102	-0.141559	-0.906845	-0.107128	-0.0743537	0.0783301	-0.0632314	0.080031	0.235377	0.461931	0.116291	0.142712	0.115309	0.134416	0.844131	0.132477	0.0722436	0.014978	-0.0178001	-0.0199903	-0.226679
FOXP2	-0.0270863	0.112259	0.0569723	-0.00591169	0.0275152	-0.0524192	-0.788493	-0.0479753	0.00886843	0.0512987	-0.0532856	-0.00785592	0.269637	0.312716	0.204756	0.269264	0.254308	0.324473	0.927569	0.0854328	0.130461	0.101726	0.0597292	0.0850099	-0.0538399
B4GALNT2	0.103104	0.135755	0.0205565	-0.112203	-0.0994519	-0.169163	-0.553229	-0.0750688	-0.0224854	0.0040686	-0.0405824	-0.0130638	0.272685	0.185252	0.154747	0.302002	0.260112	0.332716	0.768747	0.105133	0.155438	0.391239	0.00996283	0.0977738	-0.0637839
FMR1NB	0.015733	0.207342	0.0516705	-0.0062473	-0.0116723	-0.0406384	-0.858661	-0.0294098	-0.000843015	0.0477714	-0.0587901	-0.00781641	0.20243	0.290362	0.15782	0.171144	0.173224	0.189629	0.884885	0.0674211	0.126784	0.0781249	0.0980929	0.0609904	-0.0671727
GCSAML	-0.0498274	0.0364392	0.231251	0.0279567	0.00276742	0.0444611	-0.85615	-0.0392654	-0.0210385	0.0554031	-0.0573818	0.145918	0.151723	0.2188	0.111932	0.110345	0.132595	0.165521	0.839993	0.00530405	0.0647906	-0.012488	0.0110704	6.16429e-05	-0.0652955
SIGLEC11	-0.0156007	0.00271289	0.00980322	-0.0198109	0.0621266	0.0149625	-0.65979	-0.0404813	-0.0166473	0.0980745	-0.0030872	-0.00304301	0.0778156	0.166299	0.105045	0.0593717	0.0708952	0.0696919	0.588626	0.0193535	0.0547212	-0.0200424	0.051755	0.00221763	-0.0801363
IL23R	-0.0184451	0.157214	0.0656612	-0.1206	-0.00266489	-0.145247	-0.765714	-0.0155526	0.0537473	0.0978795	-0.0760673	0.00225081	0.314499	0.25112	0.242184	0.319143	0.280955	0.350104	0.94553	0.115238	0.164699	0.166914	0.0742604	0.123717	-0.0189747
MAGEB18	-0.00658954	0.057811	0.0559203	-0.0199322	0.0237726	-0.0192964	-0.850789	-0.041473	0.00305782	0.062193	-0.0266229	0.00174314	0.173019	0.234196	0.146255	0.142494	0.155303	0.175067	0.834472	0.0522852	0.11813	0.0455417	0.0636475	0.0456577	-0.0777625
CD276	-0.0455693	0.97156	0.0444547	-0.0160839	-0.0518181	-0.0447858	-0.000727823	-0.0445201	0.0174178	-0.0490111	-0.0524326	-0.0603334	0.0153426	-0.0106663	0.0109764	0.0301877	0.0498515	0.0734845	0.103762	-0.0146713	0.0145484	0.0271434	-0.0405818	-0.00022762	0.152743
IFNL2	-0.0269909	-0.00505196	-0.00859751	-0.035771	0.0205742	-0.0136422	-0.399734	-0.0382489	-0.0301645	0.0332457	-0.0137274	0.102911	0.0327307	0.0840055	0.05547	0.0321408	0.0323261	0.0393285	0.344869	-0.00415843	0.0417093	-0.0220788	0.0076147	-0.00321547	-0.0469295
IFNL1	0.0183787	0.0465934	0.0153734	-0.0685943	-0.0359006	-0.088101	-0.439417	-0.0457554	-0.00633133	0.016993	-0.0779817	-0.0346559	0.896772	0.20986	0.0959428	0.131383	0.143432	0.160059	0.515528	0.00818236	-0.00124268	0.0206799	-0.00643817	-0.000719027	-0.121848
C4orf36	-0.00826452	0.0934629	0.0745529	-0.0716963	-0.0484363	-0.0766365	-0.861269	-0.0306884	-0.0182607	0.0393674	-0.0558817	0.250562	0.2476	0.253002	0.158138	0.235062	0.210624	0.259641	0.942245	0.0784718	0.136898	0.101222	0.0228711	0.0777539	-0.0649467
FIGNL1	-0.00538593	-0.115199	-0.331768	0.0668737	-0.0924829	-0.0265244	0.0990647	0.00612437	-0.0266943	-0.358426	-0.061228	-0.123527	-0.0530014	-0.0374035	-0.092052	-0.0862705	-0.0724318	-0.114283	-0.136585	-0.15583	0.403882	0.442051	0.106636	0.0188726	0.0612305
RIMS1	-0.0317875	0.0449987	0.0430723	-0.0384949	-0.0378909	-0.0751578	-0.873248	-0.0774054	-0.0213547	0.00474893	-0.0421347	0.0670452	0.141848	0.193527	0.145478	0.129497	0.125694	0.161865	0.80198	0.0147257	0.121796	0.0186415	0.038378	0.0186328	-0.0747148
PITPNM2	-0.031239	0.110827	0.0414909	-0.0896898	0.012027	-0.100899	-0.585019	-0.0296006	-0.0273173	0.0772415	0.0342565	0.0366664	0.229534	0.218233	0.21454	0.253364	0.219618	0.289082	0.73128	0.0805318	0.120606	0.106571	-0.0204158	0.0667525	-0.0161091
PCDH10	-0.0519928	0.153376	0.0742872	-0.0451242	-0.055873	-0.0956767	-0.725516	-0.0292714	-0.0247357	0.134217	0.0456609	0.03265	0.336646	0.286713	0.279195	0.364323	0.325748	0.429351	0.957259	0.12223	0.162877	0.186672	0.0374332	0.105254	0.00452543
TAB3	-0.0618802	-0.0874648	-0.0355199	-0.0686144	0.0711916	-0.0562916	-0.474457	-0.176249	-0.172335	-0.0962049	-0.186262	-0.0115265	0.194474	0.624485	0.0499799	-0.021127	-0.0507382	-0.0171781	0.417181	0.145674	0.082332	-0.0860537	0.205218	0.0695984	-0.230609
GRK7	-0.0280823	0.145719	0.102804	-0.025726	-0.0809585	-0.0688467	-0.759105	-0.0569253	0.0334589	0.00589914	-0.0241557	0.0178312	0.31298	0.288278	0.238157	0.340484	0.311871	0.383253	0.963146	0.0964126	0.158334	0.13623	0.0476922	0.110405	-0.0293847
MMEL1	-0.0944617	0.490765	-0.1574	-0.120972	0.110945	-0.0352348	-0.32729	-0.114413	-0.0177398	-0.0863323	-0.217058	-0.186834	0.0647124	0.0629032	0.0182272	0.0782654	0.137658	0.281636	0.374148	0.408266	0.132892	-0.017953	0.0636085	0.0416149	0.0408431
PDE8A	0.540821	-0.114668	-0.213735	-0.241683	-0.156391	-0.21049	-0.457874	-0.263743	-0.257865	-0.0966178	-0.247428	-0.178715	-0.0589356	0.142043	-0.119142	-0.113924	-0.154238	-0.163872	0.200648	-0.162706	-0.100556	-0.214513	0.0306057	-0.198372	-0.587987
NLRP6	-0.0370493	0.155512	0.100927	-0.0626975	-0.0238388	-0.0244889	-0.760722	0.0131081	-0.00241197	0.0529815	-0.0300532	0.00841653	0.304078	0.304183	0.250431	0.329082	0.303769	0.368348	0.943679	0.109728	0.167359	0.160193	0.0717356	0.113143	-0.00690266
AKNAD1	-0.0494839	0.0354373	-0.00210104	-0.0718483	-0.0334054	-0.0882774	-0.685706	-0.0295047	0.0149533	-0.00375014	-0.0729598	0.0155881	0.171448	0.179571	0.131345	0.119326	0.117814	0.155872	0.709908	0.0227876	0.124072	0.552494	-0.00083467	0.0282695	0.0153009
ZCCHC5	0.0715942	0.0251706	0.128056	-0.172758	-0.0797337	-0.159171	-0.469977	-0.126821	-0.0167647	-0.0468113	-0.190037	0.0153288	0.241256	0.830271	0.319879	0.183123	0.0784486	0.204751	0.509312	0.00741817	-0.0448142	-0.0207591	-0.132741	-0.0239166	-0.247758
ZIC5	-0.00782222	0.1214	0.0189447	-0.105842	0.080307	-0.109428	-0.484274	-0.0462466	-0.0795356	0.0263578	-0.0247362	-0.0179597	0.198518	0.196479	0.161173	0.238686	0.236635	0.862688	0.678742	0.0782058	0.101424	0.122761	0.0692382	0.110006	0.031364
ANGPT1	-0.00853396	0.0987809	0.0689524	-0.0285351	-0.00780877	-0.0730455	-0.895036	-0.0529929	-0.00240261	0.0415142	-0.0265394	0.0884346	0.238556	0.287165	0.266333	0.224805	0.216179	0.245182	0.960911	0.0796966	0.145722	0.112135	0.0597805	0.0719317	-0.0572986
TEDDM1	0.133359	0.109791	0.0503816	-0.0627069	0.0115352	-0.0810388	-0.677329	-0.0480166	-0.020318	0.0491019	-0.032454	-0.00341196	0.242362	0.218004	0.182696	0.248518	0.229635	0.231314	0.801321	0.0752232	0.124281	0.108931	0.0179572	0.0614325	-0.105201
LOC149373	-0.110629	0.0487083	-0.014462	-0.181162	-0.027863	-0.077935	0.013851	0.00105759	0.0438681	-0.0105975	0.0255939	-0.363035	0.0245477	0.0229068	0.045716	0.732877	0.0700418	0.0842415	0.117565	0.0480142	0.0485572	0.0137025	0.592779	0.0730271	0.17455
GABRG1	-0.0401852	0.169741	0.0987534	-0.0957467	-0.0593417	-0.0350135	-0.735896	-0.0504075	-0.00570508	0.0355361	-0.056694	0.00575801	0.307292	0.236867	0.241755	0.333498	0.311809	0.378496	0.948484	0.11728	0.28336	0.172245	0.0666775	0.12275	0.00325492
PANX2	-0.0889573	0.149135	0.138451	0.0799916	-0.0494377	-0.09071	-0.672598	-0.0351751	-0.0195089	0.177567	-0.0787654	-0.00254085	0.245859	0.244588	0.189518	0.336315	0.264828	0.370771	0.875975	0.103414	0.140724	0.170155	0.22692	0.12015	0.0471892
ZNF114	-0.183944	-0.0241403	-0.00222783	0.967197	-0.0353893	0.0525947	0.0808368	-0.00535209	-0.0306178	-0.0626103	0.017049	0.112752	-0.0704229	-0.0979137	-0.0735121	-0.080894	-0.0465928	0.0245073	-0.101567	-0.0685118	-0.0323667	-0.0420962	-0.0163553	-0.0131594	0.182788
CCDC27	0.0447004	0.0893073	0.0383349	-0.0986195	-0.0835613	0.00684498	-0.846458	-0.0189728	0.0171959	0.0350797	-0.0345247	0.0045245	0.32174	0.333516	0.207429	0.247714	0.219831	0.280624	0.94601	0.0804746	0.127375	0.0681381	0.0640711	0.0747358	-0.114658
C15orf26	-5.35817e-06	0.0670867	0.077871	-0.0351068	0.0337531	-0.0301556	-0.903701	-0.000881463	0.0147961	0.0906395	-0.0392066	0.0320999	0.216081	0.289861	0.205011	0.169759	0.178016	0.191349	0.922057	0.0618322	0.126998	0.0491462	0.0556812	0.0581638	-0.079393
NEUROD2	0.000819036	0.618766	0.0145435	-0.00637524	-0.0251343	-0.170941	-0.378817	-0.0776814	-0.00679065	0.0391727	-0.0495972	-0.0270192	0.0950556	0.455918	0.0604517	0.0641778	0.0672002	0.0876803	0.39852	0.019798	0.00354021	0.00687861	0.00944529	-0.00584006	-0.033762
C5orf17	-0.0205391	-0.0220534	-0.0526078	-0.0371921	0.0165632	-0.0555636	0.0777653	-0.033687	-0.0255366	-0.0001866	-0.0627834	-0.0780576	0.0181858	0.025841	-0.00800231	0.00470338	-0.0192539	0.0336138	0.0773994	-0.00128311	0.0304338	0.672034	-0.00982451	-0.00550757	0.0239125
LINC00208	-0.0459302	0.00710245	0.0172952	-0.0191125	-0.0555927	-0.049738	-0.255908	-0.0520014	-0.0102948	-0.027822	-0.00650123	0.00847284	0.0160431	0.0262965	0.254605	0.0291708	0.0187249	-0.00223985	0.182984	-0.0189581	0.00745397	-0.106028	0.0402268	-0.020475	-0.0263377
DNAH6	-0.157868	0.0434013	0.000799517	-0.0361867	-0.13501	-0.0952936	-0.247816	-0.0117057	-0.028101	-0.0653289	0.85587	0.166794	0.0349561	0.0761439	-0.0108051	0.0773838	0.0781426	0.112577	0.318397	0.042647	0.1066	0.0602402	0.0327529	0.159549	0.169633
LRRC15	-0.036392	0.0735086	-0.0219668	-0.0365254	0.0299116	-0.0293777	-0.587844	-0.0230978	-0.0103237	0.040928	-0.0118529	0.0103208	0.170977	0.216827	0.156929	0.18111	0.170763	0.194657	0.638706	0.0500866	0.0609159	0.0713845	-0.0604851	0.0551914	-0.0407711
TTC40	-0.0924485	0.185315	0.104378	-0.0526169	-0.0201421	-0.100738	-0.606823	-0.0229935	0.00647028	0.10121	0.0135842	0.02293	0.343111	0.258842	0.263628	0.399605	0.353825	0.530824	0.899946	0.0903905	0.172432	0.248349	0.0282771	0.132861	0.0689766
B3GNT7	-0.118324	0.089979	0.025953	-0.0371624	0.00629307	-0.0979352	-0.430707	-0.0326896	0.0111027	0.0138199	0.0571222	0.0319912	0.197289	0.200587	0.162255	0.248844	0.190308	0.25336	0.637142	0.0387989	0.813106	0.173831	0.0609503	0.0825649	0.133963
ZNF645	0.0891937	-0.000322339	-0.0101618	-0.077164	-0.0130541	-0.0374102	-0.436949	-0.0295703	-0.032114	0.0280657	-0.0710036	-0.0590413	0.259442	0.185194	0.108334	0.115502	0.0959138	0.121963	0.561002	0.0370889	0.0507488	0.0371753	0.00592931	-0.0105543	-0.223202
ZMYM6	-0.0065553	0.00545474	0.014402	-0.0315541	-0.0230261	-0.021692	-0.905944	-0.0680674	-0.0183673	0.0406436	-0.0598932	0.023483	0.128804	0.210796	0.0944096	0.0822594	0.093834	0.074216	0.783744	-0.0179196	0.131839	-0.0155903	0.0335625	-0.0135002	-0.106455
SGCZ	-0.0597638	0.141793	0.0794523	-0.0254969	-0.00133048	-0.0256825	-0.800368	-0.0125204	0.0185724	0.103153	0.0317045	0.0209757	0.299773	0.265088	0.184984	0.299907	0.279716	0.348107	0.972565	0.0983121	0.173221	0.148182	0.0558202	0.110579	0.00583584
LOC100507431	-0.00616413	0.0598035	0.0466191	0.0822215	0.0357685	-0.00193102	-0.842861	-0.0452641	-0.012705	0.0937729	-0.0479081	-0.00328082	0.213789	0.271826	0.14764	0.155935	0.163422	0.184428	0.909006	0.0592601	0.111188	0.0452712	0.0584013	0.0469417	-0.0962047
WNT9B	-0.171386	0.118364	0.0894751	0.0145056	-0.0558527	-0.0393471	-0.508834	0.0211499	0.0685699	0.0795581	0.00910277	0.0254925	0.225619	0.159915	0.232848	0.24783	0.223883	0.254398	0.722024	0.0689583	0.724861	0.165645	0.104391	0.110854	0.173134
CNPY3	-0.129487	-0.0296006	0.0988519	0.0834724	-0.192694	0.00584559	-0.132085	0.0186036	-0.00134189	-0.0498906	-0.0326945	0.264327	-0.124792	-0.0644715	-0.0431902	-0.0577912	-0.158229	-0.298985	0.0339266	0.285992	0.181323	-0.093272	-0.0676772	0.469237	0.108927
SCAMP1	0.323091	-0.127432	-0.0522071	-0.0545477	-0.252057	-0.158969	-0.786793	-0.228585	-0.269771	0.0444354	-0.133918	-0.0691938	-0.0679387	0.164973	0.00601486	0.0520924	-0.00236782	-0.07475	0.53084	-0.020938	-0.00343415	-0.305092	-0.0196692	-0.00755677	-0.417315
LINC00471	0.00221696	0.0897188	0.0710766	-0.00165221	0.0285906	-0.0161689	-0.775252	-0.0485767	0.00788633	0.0552626	-0.0298038	0.0170075	0.20321	0.252891	0.167073	0.181692	0.197132	0.274721	0.833684	0.061189	0.127818	0.088014	0.0691199	0.0606421	-0.049626
HAS3	-0.0127259	-0.0383414	-0.0933581	-0.0486065	-0.0284611	0.162071	-0.608555	-0.0596355	-0.0735997	-0.0129199	-0.0848577	-0.098347	0.0156273	0.0722607	-0.0457117	-0.0129114	-0.00369616	0.0391697	0.423098	-0.100349	-0.00194307	0.0230163	-0.0312866	-0.0663119	-0.0881096
FGF4	-0.0419263	0.184367	0.106255	-0.0572219	-0.0267761	-0.0955192	-0.653534	-0.0235827	0.00432118	0.0551311	-0.0204801	0.0221427	0.408757	0.287427	0.270847	0.397556	0.323974	0.462608	0.918963	0.0812393	0.169126	0.190383	-0.00921306	0.127962	0.000676426
SLC30A8	-0.0487089	0.19729	0.104143	-0.0444417	-0.0629922	-0.140006	-0.692262	-0.0203693	0.0448539	0.0641346	-0.0179892	0.0283232	0.355703	0.286708	0.292752	0.392964	0.34483	0.423177	0.949788	0.139268	0.183136	0.207576	0.031543	0.140391	0.0206769
LOC142937	-0.355208	0.0630052	0.0570283	0.307238	0.577818	0.823272	0.293426	0.24066	0.0350523	-0.144028	-0.0751235	-0.0535997	-0.157706	-0.220914	-0.179641	-0.161829	-0.117069	0.0309786	-0.332907	-0.113374	-0.13099	-0.0651932	-0.0929844	-0.0366596	0.334763
LOC439933	-0.00514783	0.0685996	0.0682199	0.034344	-0.00336796	-0.00607589	-0.914678	-0.0189703	-0.0150253	0.0577934	-0.00393879	0.00528604	0.220223	0.274673	0.146513	0.181875	0.178658	0.188188	0.933302	0.0559632	0.131699	0.0558278	0.0531175	0.0612011	-0.0750754
C11orf65	-0.0734077	0.0102771	0.955401	0.0678649	-0.040447	-0.0138875	-0.0884055	-0.0563694	-0.0270175	-0.0347518	-0.0846637	-0.0440408	-0.0270513	-0.050511	-0.0277748	-0.0289077	-0.00148803	-0.0167743	0.092974	-0.0538076	-0.0127185	-0.0430925	-0.0383734	-0.0153079	0.0471114
FAM71E2	-0.0631957	0.206769	0.0954425	-0.0449576	-0.0492744	-0.0933562	-0.624592	-0.0420065	0.00430856	0.069885	-0.00275475	0.0177169	0.344694	0.25219	0.284556	0.415632	0.379323	0.459483	0.905041	0.107811	0.169386	0.191794	0.0108171	0.136588	0.0316575
OR5P2	-0.0936348	0.17615	0.0937338	-0.0325339	-0.0331091	-0.0789108	-0.611073	-0.0320245	-0.00884205	0.0686004	0.0366057	0.0450042	0.333773	0.240704	0.2743	0.404612	0.355249	0.433211	0.891888	0.0750973	0.196844	0.193708	0.0255392	0.112681	0.0502532
DYDC1	-0.00659352	0.053813	0.0538789	-0.014204	0.0368926	0.0164339	-0.832403	-0.0317367	0.00519214	0.0800393	-0.00747893	0.000294565	0.169721	0.252816	0.127616	0.137985	0.15073	0.155578	0.817739	0.0521492	0.11114	0.0433753	0.0611091	0.0395858	-0.0745628
IL27	-0.153828	0.218027	0.131409	-0.0120968	-0.0183357	-0.0830809	-0.582932	-0.00745045	0.0150754	0.0793864	0.0392377	0.0577084	0.338664	0.254739	0.29752	0.434094	0.364568	0.443976	0.879331	0.0915495	0.215065	0.224918	0.0373628	0.141771	0.111747
IQCF1	-0.076719	0.167329	0.089905	-0.0125411	-0.0352861	-0.159695	-0.682974	-0.0321109	-0.00656642	0.0897203	0.0112796	0.0388179	0.389702	0.305169	0.242502	0.391708	0.350413	0.433777	0.929328	0.0923996	0.173629	0.18927	0.0237362	0.119754	0.0153049
DEFB125	-0.0412332	0.175279	0.119375	-0.101625	0.00751301	-0.0422665	-0.693673	-0.00635536	0.0263534	0.00453484	-0.0623764	-0.00517072	0.311291	0.231858	0.263363	0.35308	0.327635	0.441726	0.934495	0.113624	0.159736	0.172427	0.0585788	0.12966	0.0116515
WFDC10B	-0.166136	0.103185	0.106595	-0.00713207	0.102441	0.197865	-0.346811	0.0501624	-0.140497	-0.0900333	-0.102911	0.174448	0.208122	0.0412768	0.0225296	0.368858	0.241001	0.658	0.602272	0.0949444	0.0586132	0.0992926	0.344249	0.124445	0.147797
PKHD1	0.0354166	0.0669493	0.0576761	-0.0739472	-0.0995942	-0.165356	-0.746061	-0.108069	-0.0550302	0.0930398	-0.0639413	0.030843	0.218278	0.248846	0.20898	0.222456	0.194601	0.244731	0.798328	0.0519938	0.127616	0.0515895	0.0353658	0.0346318	-0.113989
PKD1L1	-0.0606872	0.15225	0.0432379	-0.0259306	0.074842	-0.083743	-0.74506	-0.0661759	0.00323676	0.0925791	-0.0337342	0.0374186	0.354902	0.345176	0.257055	0.302196	0.301468	0.412686	0.958602	0.114368	0.174104	0.187379	0.0446022	0.132244	-0.00329373
GPR112	-0.0409643	0.159448	0.106349	-0.0194902	0.0232503	-0.0673207	-0.718981	-0.0445568	0.0192151	0.056905	-0.0225636	0.00368624	0.300947	0.261616	0.249048	0.329466	0.307065	0.43122	0.940517	0.0946806	0.164336	0.162911	0.0617626	0.1123	-0.00457864
TENM1	-0.0457605	0.571094	0.0802334	-0.0279592	-0.0273774	-0.0676471	-0.611299	-0.0633829	0.0269905	0.00839761	0.0319651	0.0148329	0.235045	0.206258	0.339841	0.268973	0.268268	0.334694	0.827723	0.0758161	0.136505	0.135032	0.0458784	0.0788029	0.0745798
REXO1L1P	-0.018306	0.148717	0.0844801	-0.0673134	-0.0591918	-0.102131	-0.727037	-0.0407757	0.00494056	0.0765764	-0.0181718	0.0270039	0.304471	0.27179	0.227921	0.314497	0.279238	0.344108	0.911913	0.106941	0.14908	0.14918	0.0408264	0.105304	-0.0269552
TAF1L	-0.124069	0.0464237	-0.0684555	0.009153	0.0244074	-0.0523427	-0.366524	-0.0777041	-0.0308954	0.260481	-0.0447203	-0.0186147	0.150177	0.24771	0.146693	0.147116	0.303073	0.162902	0.549979	0.352179	0.0764159	0.0909904	0.0939867	0.0891207	-0.0176998
CNTNAP5	-0.0421738	0.154596	-0.0361288	0.00187305	-0.0860591	-0.0156203	-0.692844	-0.000699916	0.0468406	0.00804144	-0.0545539	-0.0117058	0.37215	0.249931	0.210364	0.327705	0.317701	0.426899	0.919849	0.0978846	0.168452	0.200038	0.0838733	0.137767	-0.00414406
RECQL4	-0.490736	0.042636	0.0212792	0.314418	0.198148	0.274162	0.659185	0.312662	0.386589	-0.108432	0.28805	-0.145513	0.0125508	-0.380013	-0.121503	0.108509	0.153387	-0.00113291	-0.501003	0.134068	0.118456	0.134105	0.0170349	0.180581	0.615058
GPR113	0.000633633	0.0911345	0.0418794	-0.0482999	-0.024718	-0.0477534	-0.792983	-0.055456	-0.0297955	0.0693081	-0.01446	0.00624579	0.295453	0.264314	0.185009	0.269086	0.23952	0.253091	0.841313	0.0296851	0.118275	0.0778936	0.0155108	0.0330095	-0.0560986
TMC2	-0.0783552	-0.00861785	-0.0135414	-0.00499171	-0.0294188	-0.0355605	-0.355466	-0.0453611	0.0770449	-0.0054977	-0.011273	0.0355227	0.0502121	0.0689604	0.021282	0.0340744	0.036393	0.0578351	0.253693	-0.0369152	0.0318561	0.00878915	-0.0234066	-0.0269583	0.0192383
SMCR5	-0.0606596	0.0895191	0.0767107	0.0132166	0.0602425	0.0102415	-0.220403	-0.0264348	-0.00209036	0.0275458	-0.00559653	-0.0325642	0.106354	0.102208	0.134301	0.128825	0.17795	0.97614	0.410796	0.0515794	0.0479551	0.0725203	0.0342694	0.0708635	0.100802
BICD2	-0.0199361	0.107898	0.0642246	0.0422503	-0.0723751	-0.114869	-0.725974	-0.0617801	-0.0241944	-0.021217	-0.0675355	-0.0142902	0.236864	0.20227	0.145522	0.204421	0.217756	0.265982	0.779812	0.051535	0.111083	0.0552244	0.0406996	0.0317097	-0.0638521
ZIM3	0.0378187	0.120738	0.0506034	-0.118079	-0.0181742	0.00890453	-0.814486	0.00845329	-0.0233851	-0.0070368	-0.0638073	0.0659047	0.264528	0.230233	0.225094	0.2621	0.233191	0.325858	0.943242	0.103067	0.147308	0.0976485	0.0159288	0.10094	-0.078201
NOX5	-0.197538	0.0959861	0.0813287	-0.0307629	0.0240604	-0.00236949	-0.412404	-0.00283867	0.0401677	0.00917528	-0.0829315	0.0393022	0.233449	0.672836	0.147512	0.241641	0.185926	0.22905	0.583138	0.099924	0.0825703	0.0939434	0.0777172	0.0709978	0.0149709
DAOA-AS1	-0.062502	0.126658	0.0523328	-0.0227867	0.0259624	-0.0335676	-0.750313	-0.0439977	0.0192806	-0.000862898	-0.0263487	-0.00659214	0.256455	0.225878	0.198764	0.259979	0.238515	0.313704	0.907418	0.0905019	0.16632	0.354583	0.0216577	0.104415	0.0259056
GPR126	-0.038274	0.110461	0.0894715	-0.168078	-0.0726947	-0.142017	-0.659377	-0.00869554	-0.0227482	0.0526999	-0.0055591	-0.0420217	0.262885	0.288346	0.180567	0.282237	0.253322	0.330732	0.842217	0.0902073	0.135301	0.115003	0.113348	0.462954	0.00733633
KLHL4	-0.063834	0.140244	0.00421582	0.092154	-0.106558	0.0419811	-0.767332	-0.0485139	0.060577	0.0492348	0.0204433	0.0222837	0.294988	0.347782	0.0931148	0.258384	0.267381	0.282737	0.917962	0.115416	0.168056	0.139891	0.115295	0.108799	0.00136512
GPR156	-0.0274743	0.181307	0.124017	-0.0643342	0.0158314	-0.162252	-0.689971	-0.0656879	-0.0147038	0.0434129	-0.057472	-0.00197315	0.361023	0.315416	0.284577	0.377795	0.334961	0.41792	0.938383	0.109894	0.171298	0.186667	0.0148641	0.119771	-0.03166
SUOX	0.529343	-0.219079	-0.324482	-0.135616	0.0706876	0.0442322	-0.00632313	-0.123902	-0.193977	-0.13476	-0.270769	-0.0895923	-0.0213326	0.0532559	-0.177699	-0.147076	-0.21971	-0.404703	-0.199282	-0.0910252	-0.17447	-0.417385	-0.0671507	-0.202093	-0.570637
GPR115	-0.0132433	0.176046	0.0760089	-0.0174852	-0.104109	-0.147815	-0.667944	-0.0718024	0.0169229	0.0097965	-0.0380238	0.015757	0.33817	0.310733	0.259599	0.365972	0.31789	0.401834	0.915016	0.0993746	0.13775	0.179956	0.0469394	0.120461	-0.0273649
IL31RA	0.00959011	0.108887	0.10042	-0.0351597	0.00700821	-0.0525114	-0.745036	-0.0225252	0.0166046	0.0873202	-0.0296299	0.00668378	0.274379	0.340182	0.192739	0.247375	0.239735	0.273617	0.888622	0.0838626	0.144513	0.141831	0.105323	0.0762286	-0.042926
SYTL5	0.433194	-0.0682053	-0.0591827	-0.109747	-0.116266	-0.0976951	-0.207341	-0.139278	-0.103973	-0.0743315	-0.134277	-0.0856091	-0.0196478	0.0083729	-0.0607205	-0.0571394	-0.0560075	-0.0783833	0.0996407	-0.0673568	-0.0819777	-0.12235	-0.0878579	-0.0804677	-0.360872
SDCCAG8	-0.261133	0.273177	-0.186741	0.598014	0.0711508	-0.0933711	-0.416639	0.0350964	-0.0519478	-0.00538339	-0.0807518	0.0284827	-0.025447	0.143422	0.189212	0.0509323	0.142165	0.0842926	0.435737	0.0690941	0.0741734	0.0245719	0.0543303	0.214524	0.188489
GPR111	-0.0444488	0.179919	0.109807	-0.0282296	-0.0214193	-0.0885773	-0.722511	-0.0206842	0.00894226	0.0810753	-0.0110178	0.0151383	0.347608	0.300114	0.259558	0.375796	0.343112	0.415582	0.963344	0.113598	0.166386	0.187003	0.0385572	0.127397	0.0125764
SYN2	0.0982662	0.0476442	0.0104785	-0.0362006	-0.0269419	-0.0676849	-0.784015	-0.11621	-0.0498085	0.0585223	-0.123566	-0.00691856	0.296905	0.376689	0.100402	0.258119	0.21786	0.230545	0.907994	0.0482615	0.0881822	0.0828798	0.0325003	0.0514843	-0.202648
ASB10	-0.10458	0.045179	-0.00879353	0.0214354	-0.0232887	0.00133985	0.0180982	0.00237935	0.0543488	-0.00487992	0.0176432	-0.0603237	0.0271873	0.0177742	0.0618971	0.0623484	0.966687	0.0709939	0.0830587	-0.00512479	-0.00273862	0.00949637	-0.00972628	-0.0205552	0.153357
HTR3C	-0.0681765	0.185232	0.0979864	-0.0583853	-0.0167019	-0.0584058	-0.686923	-0.00488669	-0.0173587	0.050346	-0.0212777	0.0248337	0.348488	0.287263	0.261534	0.384284	0.337608	0.448128	0.937607	0.104491	0.190405	0.182372	0.0140776	0.140297	0.0235224
NFKBID	-0.0123504	0.0975743	0.0808589	0.0109203	0.0646217	0.0110267	-0.814937	-0.107156	0.0312949	0.0676885	-0.0079143	0.00148919	0.232477	0.288528	0.221551	0.223717	0.211227	0.285371	0.901848	0.0701688	0.13115	0.0978499	0.0406203	0.0698298	-0.0520955
CD300LF	-0.268553	-0.0572112	-0.062986	0.224565	-0.106809	-0.0976458	0.251525	0.0843574	-0.0559576	-0.00717134	0.58508	0.274836	-0.139531	-0.0225024	0.370289	-0.0657357	-0.0841642	-0.0560241	-0.238774	0.555534	0.00537692	-0.0245445	-0.0901573	-0.0124511	0.267874
GJA10	-0.0282444	0.167599	0.0904721	-0.0812462	-0.0179262	-0.0757255	-0.727568	-0.0374017	-0.0129279	0.0778955	-0.0366771	0.00616557	0.356614	0.297072	0.219738	0.381585	0.337831	0.428425	0.963325	0.118538	0.164364	0.193219	0.0855305	0.120544	-0.00725315
WNT9A	0.0092972	0.101071	0.0387994	0.00611721	-0.0448535	0.0101231	-0.849137	-0.0862219	-0.0426267	-0.0275691	-0.0996981	-0.0002794	0.271097	0.320314	0.175313	0.260594	0.234768	0.29779	0.945973	0.0561612	0.133482	0.104745	-0.0340787	0.0876743	-0.101827
GAL3ST2	-0.361403	-0.0276788	-0.0475187	-0.067758	-0.00938548	0.261237	0.265065	0.668443	0.596281	0.257938	-0.0135449	-0.0400058	-0.0920652	-0.147591	0.0573433	-0.0681598	-0.083766	-0.0774464	-0.163126	-0.0777918	0.286966	0.301877	-0.0656407	-0.0280636	0.443965
PIP4K2B	-0.197183	0.546758	0.00799788	0.00330905	0.0158639	-0.0206407	-0.183721	-0.0623755	-0.0120263	0.00415282	-0.004281	-0.012047	-0.000786819	0.040328	-0.00246441	-0.0228552	0.0137305	0.0389407	0.159117	-0.046836	0.0123691	0.00492481	-0.0160864	-0.0273643	0.112371
ODF3	0.0366828	0.119844	0.045845	-0.302782	-0.096432	-0.0327102	-0.74411	-0.0200761	-0.049654	0.127159	-0.0806794	0.0177034	0.28285	0.22676	0.178282	0.27324	0.252997	0.266119	0.860145	0.0542976	0.107602	0.0755033	-0.0297636	0.104193	-0.124821
WFDC13	-0.00567393	0.124759	0.102334	-0.0867328	-0.00971137	-0.0465724	-0.855245	-0.0515057	0.0379882	0.0173739	-0.0892166	0.00202875	0.28301	0.330107	0.174484	0.25726	0.255111	0.32116	0.973121	0.0895398	0.14933	0.149382	0.0127608	0.087168	-0.0650785
LINC00521	-0.199013	0.156011	0.125222	0.177877	0.019766	-0.134757	-0.457361	0.0118684	0.045626	-0.0674064	0.0130292	-0.0145083	0.275842	0.118683	0.0799916	0.382554	0.231109	0.456231	0.712629	0.104495	0.138841	0.153443	0.123039	0.470805	0.186172
SLFN5	-0.360996	-0.0824327	-0.0841544	0.306411	0.0234266	-0.00353109	0.276775	0.490639	0.123042	0.328295	0.437613	0.526525	-0.188813	-0.228892	-0.188085	-0.158628	-0.176166	-0.148545	-0.306699	-0.127642	0.0450233	-0.0576945	0.0364943	-0.0701789	0.389687
SERPINB12	0.030005	0.148641	0.0844402	-0.071555	-0.0957493	-0.171937	-0.724834	-0.0458176	0.00176874	0.020824	-0.0736221	0.0502409	0.292442	0.35329	0.255911	0.260703	0.25599	0.289055	0.890467	0.10037	0.158698	0.104402	0.0175309	0.0987921	-0.0848648
GIPC3	-0.00606583	0.0380533	0.043381	0.0575927	0.0399354	0.0315439	-0.546228	0.02884	0.0405896	0.0929454	-0.00388335	-0.00788836	0.164184	0.332132	0.117741	0.114604	0.13699	0.120822	0.604559	0.0309446	0.0643207	0.0406256	0.0693339	0.0249217	-0.0281109
PGLYRP3	-0.0694355	0.12817	0.0680109	-0.115679	0.0430843	-0.0126975	-0.836954	0.00850538	0.0804852	0.11562	-0.0816793	0.0347173	0.290087	0.337589	0.1616	0.29865	0.25329	0.304797	0.965444	0.103724	0.158476	0.170674	0.091676	0.0923496	-0.00128345
PSKH2	0.0203309	0.170369	0.131249	-0.0653777	0.0642014	0.058452	-0.707389	-0.00305752	0.0502176	-0.120754	-0.181356	-0.00182932	0.327637	0.329519	0.0909195	0.312474	0.2295	0.371566	0.89392	0.115968	0.148603	0.157119	-0.0885973	0.128175	-0.0632981
OR6W1P	-0.0183868	0.118443	0.0859102	-0.0253362	-0.00421554	-0.077159	-0.314288	-0.0151024	0.0330326	-0.00768304	-0.0264634	-0.0251922	0.182015	0.191397	0.137843	0.209087	0.21645	0.943434	0.548982	0.0666185	0.0719928	0.106337	0.0243262	0.0795086	0.0532011
MOGAT1	-0.0884715	0.00996706	0.976822	0.0828245	-0.0338344	0.00620779	0.0592522	-0.0352135	-0.0167683	-0.0370503	-0.0731501	-0.043752	-0.018581	-0.0779516	-0.0406289	-0.047886	-0.0190636	-0.040427	-0.0452832	-0.054111	-0.0714966	-0.0541324	-0.0220439	-0.0512861	0.0705187
GPR78	-0.0608606	0.450469	0.0645659	-0.0105572	-0.085395	-0.0938728	-0.510593	-0.00884427	-0.0418566	0.0389505	0.1579	0.0250377	0.342339	0.222784	0.227907	0.256678	0.444706	0.429703	0.747441	-0.0623113	0.135324	0.149343	-0.0581745	0.0687902	0.0771843
H1FOO	0.00432388	0.128968	0.0996566	-0.0546791	0.0012604	-0.170348	-0.746276	-0.0396627	-0.238524	0.121342	-0.024728	0.0429555	0.291655	0.323568	0.256885	0.28938	0.270872	0.313764	0.925716	0.148559	0.15749	0.14562	0.0605621	0.211681	-0.0670729
TAAR9	-0.0602525	0.16252	0.0757455	-0.0539735	-0.0378595	-0.0862298	-0.668984	-0.0328955	-0.0133031	0.0515583	-0.0134471	0.00946694	0.299393	0.252606	0.235051	0.34639	0.312861	0.388608	0.866722	0.0866882	0.157083	0.163206	0.0137683	0.113823	0.0095829
GNRHR2	-0.106386	0.110004	0.0351267	-0.0661299	-0.00590961	0.0502983	-0.594811	-0.00553803	0.225052	6.87153e-06	-0.0547798	-0.0462812	0.209254	0.249052	0.161215	0.18933	0.643224	0.20983	0.720681	0.0228814	0.0737819	0.105612	-0.0397111	0.111686	0.0648513
MYOZ3	-0.0323262	0.165234	0.0426875	-0.0828389	-0.0677131	-0.0297026	-0.660029	-0.0250081	0.0323905	0.0852441	-0.0328998	0.022954	0.339382	0.287415	0.245454	0.403488	0.336339	0.436211	0.922894	0.120242	0.159637	0.187639	0.0391986	0.13515	0.00463958
BNIPL	0.00712435	-0.0201678	-0.0286326	-0.0519515	-0.0468249	-0.0850397	-0.607484	-0.0775599	-0.0445177	-0.0304175	-0.077557	-0.0423636	0.104269	0.196898	0.0417925	0.0530612	0.0673932	0.0449436	0.511988	-0.0295953	0.023425	-0.0103018	-0.0305624	-0.0558796	-0.14199
ASB11	0.00157392	0.108669	0.0677843	0.0113797	-0.095321	-0.00608972	-0.775083	-0.0404014	0.0263489	0.156506	-0.0594439	0.0053728	0.285302	0.299812	0.213667	0.284088	0.253782	0.268774	0.911158	0.0880607	0.133728	0.0964175	0.0935131	0.0912101	-0.0638526
OFCC1	0.00693365	0.0816579	0.0582718	-0.0709886	-0.0097542	-0.0233441	-0.829884	-0.0350483	0.00652899	0.0791601	-0.0364509	0.00747303	0.21471	0.289366	0.172718	0.190618	0.196072	0.224949	0.930327	0.0819992	0.129368	0.0767569	0.0629946	0.114295	-0.102069
SDR9C7	0.0465697	-0.0809226	-0.0617435	-0.0236161	-0.0678352	-0.0741255	-0.244038	-0.0790057	-0.0928342	-0.0340952	-0.109399	-0.0186433	0.0921822	0.718384	-0.0405394	-0.0155086	-0.0283843	-0.0298082	0.166332	-0.0303749	-0.088486	-0.0614617	-0.0512417	-0.0862212	-0.245245
OR5P3	-0.133794	0.125847	-0.0107964	0.46116	-0.00907219	-0.00369486	-0.554073	-0.00893178	0.00218488	0.0741316	0.0275185	0.00771976	0.242933	0.212441	0.194852	0.253685	0.258321	0.391225	0.747515	0.0202576	0.127934	0.123574	0.039427	0.0920365	0.101661
TRIM40	0.203951	0.10303	0.0450887	-0.107651	-0.0923004	-0.115276	-0.725195	-0.0917834	-0.0482732	0.00657116	-0.101511	-0.0249597	0.266488	0.221455	0.160264	0.296989	0.246719	0.292043	0.851128	0.0600136	0.0919883	0.0715042	0.0196826	0.067341	-0.181404
CSN1S2AP	-0.0304495	0.331666	0.0687559	-0.046025	-0.0510635	-0.170031	-0.730423	-0.0954589	0.00906012	0.00981977	-0.0628158	-0.010339	0.295018	0.254874	0.306177	0.255461	0.247562	0.2959	0.893716	0.138921	0.159078	0.384383	0.0245627	0.085504	0.0226433
WFDC12	0.0269635	-0.0715346	-0.0555383	-0.0288728	-0.0728537	-0.0718259	-0.164005	-0.0664736	-0.0460158	-0.0494883	-0.109301	-0.035621	0.0705181	0.398493	-0.0494322	-0.026148	-0.0362795	-0.0425944	0.104282	-0.0315227	-0.08836	-0.0533096	-0.0556655	-0.0773409	-0.210575
CRYGN	0.0136195	0.134679	0.086057	-0.168243	0.00241677	-0.0992456	-0.724168	-0.033729	0.00716409	0.0431178	-0.0425826	0.177062	0.310521	0.452876	0.208856	0.300821	0.281635	0.346254	0.915706	0.108105	0.134506	0.14375	0.0410578	0.0853498	-0.0659954
STARD6	-0.0846848	0.846841	0.0492111	0.00443835	-0.0744805	-0.0311283	-0.381099	-0.0488027	0.0187545	-0.029249	-0.095778	-0.0474226	0.144066	0.121206	0.12311	0.169097	0.159827	0.205286	0.540555	0.0897032	0.089742	0.116438	-0.00591712	0.0655602	0.124216
C11orf40	-0.0103847	0.170399	0.12195	-0.0522233	-0.041382	-0.0542146	-0.729339	-0.0389	0.00417629	0.0583927	-0.0432846	0.00876581	0.340868	0.278004	0.264442	0.373917	0.329157	0.404115	0.963029	0.109665	0.166801	0.192936	0.0329424	0.115336	-0.0168266
C18orf12	-0.0621687	0.0989334	0.104774	-0.0135459	0.0546674	-0.00166645	-0.738108	-0.0210598	0.0252211	0.168229	-0.149135	-0.00863131	0.257785	0.319268	0.181621	0.211434	0.192488	0.227309	0.838487	0.0954601	0.121048	0.0814352	0.118649	0.0775075	-0.046118
BCL2L11	0.00930657	0.0970952	0.056784	-0.0499457	0.00145339	-0.0453141	-0.678561	-0.0525749	-0.00415702	0.153214	-0.0570758	0.0107767	0.210299	0.313115	0.143867	0.185673	0.192474	0.355973	0.836943	0.0850927	0.108645	0.0874632	0.11126	0.0679926	-0.0711069
DEFB119	-0.0335588	0.110969	0.0907277	0.0143938	0.00890751	-0.0490309	-0.717616	0.0108735	0.0372477	0.0901545	0.00827851	0.107489	0.289282	0.290961	0.195071	0.241923	0.233644	0.268332	0.866326	0.0829305	0.139508	0.119446	0.0847335	0.0817359	0.00276919
TIGD1	-0.525415	0.20362	0.211771	0.281515	0.26821	0.283943	0.56003	0.33902	0.268481	-0.0738968	0.290858	0.135847	-0.24775	-0.336953	-0.0172566	-0.0697242	-0.0529663	0.240802	-0.455426	-0.212088	0.132864	0.269762	0.0732104	-0.171809	0.660962
ALKBH5	0.599009	-0.354894	-0.214603	-0.18701	-0.124715	0.0345371	-0.433252	-0.204332	-0.117214	-0.0968071	-0.359813	0.0120382	0.00741734	0.195888	-0.231635	-0.312052	-0.196262	-0.180462	0.0925243	-0.216946	-0.417888	-0.274324	-0.236441	-0.337896	-0.729121
CCDC69	-0.0311736	-0.115423	-0.0275578	-0.0840982	-0.0316915	-0.0837901	-0.225999	-0.0330876	0.120067	0.00742524	-0.0238372	0.737345	0.0224228	0.0621328	-0.0581858	-0.0915596	-0.0646684	-0.10291	0.122163	-0.117328	-0.0545067	-0.0846178	-0.0893052	0.0561906	-0.0311166
NFX1	-0.341815	0.305029	-0.220895	-0.092207	0.26193	0.0218452	-0.527092	0.159302	0.0263829	0.0713466	0.126552	0.0606159	0.0214761	0.0148749	0.00468329	0.14298	-0.0126881	-0.000321295	0.5033	0.260987	0.345409	0.246212	-0.00180788	0.0285709	0.317022
DSG2	0.645798	-0.20791	0.03984	-0.159536	-0.317001	-0.156918	-0.397195	-0.268277	-0.151408	-0.0880738	-0.347472	-0.257692	-0.154553	0.0380677	0.12217	-0.211893	-0.0945477	-0.337516	0.134521	-0.285009	-0.17496	-0.256266	-0.191321	-0.206922	-0.688479
C5orf24	0.762123	-0.043001	-0.0873553	-0.439256	-0.376158	-0.216554	-0.140534	-0.359682	-0.163395	-0.00522667	-0.432438	-0.00553971	-0.118661	-0.0241829	-0.0780655	-0.0189373	-0.265675	-0.247773	-0.0393042	-0.120482	-0.315433	-0.405909	-0.132183	-0.0513	-0.733463
KBTBD6	-0.00749124	-0.109214	-0.106642	0.11569	0.0470607	0.0590709	-0.119116	0.0487244	-0.0543193	0.187891	-0.268122	-0.0323327	-0.319494	-0.217033	-0.0698761	-0.0773222	-0.0781954	-0.353804	-0.0407597	-0.141374	0.0495081	0.32617	-0.150092	0.0882157	0.038949
CDK8	0.141507	-0.169003	-0.150801	-0.019431	-0.204844	-0.188045	-0.452188	0.211682	0.117058	0.0136161	-0.157016	0.0954614	-0.0809021	0.0758565	0.248171	-0.00222395	-0.0886006	-0.209031	0.269737	-0.221829	0.0182912	-0.0275336	-0.203502	-0.205931	-0.204579
PTK6	0.393655	0.0479117	-0.131336	-0.424561	-0.0753158	-0.0314122	-0.0571004	-0.179033	-0.00325493	-0.022744	-0.410623	-0.219881	0.288948	0.241418	-0.0462914	-0.070818	0.203691	0.0510921	0.047293	-0.0699917	-0.307821	-0.16384	-0.217388	-0.11574	-0.482477
NKD1	-0.0345789	0.0182563	0.016918	-0.0321008	-0.0371776	-0.0798175	-0.486926	-0.019621	-0.0122406	0.0201168	-0.14373	0.250114	0.255113	0.816615	0.137123	0.154445	0.15193	0.210718	0.589107	0.0656999	0.0353851	0.0746753	-0.0355164	-0.0112239	-0.125262
STK38	0.589564	-0.236718	-0.247294	-0.179423	-0.355367	-0.177276	-0.446293	-0.305626	-0.252543	-0.165319	-0.295361	-0.192473	-0.0939045	0.156246	-0.101956	-0.105035	-0.198313	-0.336986	0.124136	-0.0413316	-0.127643	-0.261597	-0.215981	-0.163942	-0.678187
THEM4	0.0203308	-0.200728	0.210612	0.130589	0.0476894	0.249594	0.101978	-0.0454204	-0.105109	-0.0617981	0.0100236	0.0755064	-0.376501	-0.303838	-0.347511	0.12031	-0.247302	-0.15467	-0.228742	-0.331318	0.147973	-0.224684	0.188366	0.165218	0.0985264
CLSPN	-0.00424852	0.120563	0.0695674	-0.0324799	-0.00480221	-0.0458679	-0.818361	-0.0336384	0.0167233	0.126482	0.000189059	0.00825466	0.293837	0.276755	0.214233	0.27929	0.261261	0.319761	0.953935	0.0809023	0.143076	0.132558	0.0426124	0.0865381	-0.0489222
RBAK	0.324791	-0.172238	-0.161732	-0.294683	-0.108973	0.1355	0.373045	0.0532698	0.198692	0.0326139	-0.231503	0.0937925	-0.282673	-0.367057	-0.00823157	-0.0496011	-0.174449	-0.362745	-0.455229	-0.132198	-0.154457	-0.321745	0.114868	-0.0196022	-0.178909
WDR62	-0.103652	0.0968404	-0.117632	-0.0451795	-0.0104792	-0.0585997	-0.438886	-0.0621401	-0.0451872	0.182846	-0.163251	-0.0628621	0.207285	0.460787	0.0890906	0.125741	0.284307	0.142511	0.60279	0.0582357	0.0964583	0.102519	0.2481	0.0733087	-0.0757826
SLC39A12	0.0235595	0.131175	0.0946603	-0.0590099	-0.0728724	-0.108754	-0.864536	-0.0623455	0.00581814	0.0223818	-0.0472196	0.0224675	0.280012	0.260945	0.237537	0.279153	0.247622	0.298854	0.980963	0.0948777	0.157991	0.121522	0.0437164	0.0947225	-0.0770739
RNF168	-0.0191629	0.00174848	0.0276232	-0.0176707	0.018368	-0.0608545	-0.767209	-0.0440471	0.007448	0.0871707	-0.0453498	0.00498368	0.229148	0.236569	0.233744	0.102895	0.120662	0.103209	0.69032	0.0237547	0.0819362	0.0241449	0.0993223	0.00387481	-0.0701111
SVEP1	0.0146699	0.1206	0.122106	-0.0633342	-0.00211091	-0.049943	-0.76292	-0.0926422	-0.0137404	-0.0442691	-0.0625919	0.0465911	0.254116	0.244604	0.188492	0.246015	0.236324	0.294724	0.914211	0.0913531	0.124761	0.10896	0.0240728	0.0811283	-0.0912163
LOC652276	0.0494969	0.482772	0.0322332	-0.108682	-0.0743478	-0.175427	-0.153127	-0.489808	-0.0279968	0.0218044	-0.0859875	-0.03444	0.396881	0.118983	0.327362	0.52932	0.152061	0.187859	0.357528	0.0607128	-0.0963917	0.0487633	0.0643573	0.257887	-0.0208545
GATA4	-0.0696735	-0.00981555	-0.0331956	-0.0669417	0.307415	-0.0221964	-0.452152	-0.0601955	-0.0503018	0.0431926	-0.025819	-0.0379063	0.0506316	0.0822881	0.0456091	0.0753751	0.0509703	0.0783697	0.380538	-0.0134073	0.0285805	-0.01339	0.0113077	0.00654412	-0.0141355
TC2N	0.637763	-0.141053	-0.179091	-0.277887	-0.22826	0.0628828	-0.0807777	-0.234952	-0.398375	-0.552877	-0.323825	-0.190453	-0.00115939	0.0958507	-0.171343	-0.124152	-0.0814825	-0.351656	-0.0494019	-0.0173934	-0.214467	-0.182896	-0.198823	-0.202182	-0.713652
C9orf72	-0.197407	0.0658062	-0.0804644	-0.0224517	-0.117058	0.138897	0.527392	0.063928	0.162472	-0.0155642	0.15421	0.0430341	-0.337461	-0.272783	-0.140926	0.293791	0.150104	0.0430617	-0.349713	0.234325	0.129875	-0.0561371	0.257312	0.490627	0.377097
KCTD18	0.0587829	0.00515376	0.00271588	-0.0937343	0.0801488	0.148833	-0.599684	-0.0280042	-0.019508	0.0479423	-0.042564	-0.0113459	0.114129	0.155469	0.00980519	0.0433734	0.0633191	0.0819931	0.50974	-0.00786538	0.0419621	0.00184198	-0.0366759	-0.0218478	-0.111121
KLF11	-0.101591	0.121365	0.0982168	0.041335	0.0577876	0.0123915	-0.602421	0.014091	0.0447394	-0.0256579	-0.193684	-0.0252356	0.291346	0.408284	0.0192442	0.23372	0.223562	0.289086	0.765826	0.109409	0.141578	0.430321	0.10366	0.101665	0.0354407
ANKLE1	-0.0189543	0.0325357	0.0518966	-0.0279595	0.0436714	0.0516866	-0.731984	-0.00943806	-0.000478011	0.0327293	-0.0155662	0.227661	0.113399	0.181878	0.13108	0.0822985	0.114264	0.102923	0.685318	0.013232	0.0820696	0.00501199	0.0197538	0.00885218	-0.0547608
PLXNA3	-0.0446906	0.0701051	0.0792223	0.0231911	0.0450329	0.00354166	-0.699332	0.00400047	0.0276311	0.134487	0.000949534	0.00638566	0.247702	0.292089	0.209398	0.246541	0.208874	0.285553	0.843623	0.0561079	0.10751	0.100036	0.0083763	0.062511	-0.0249809
PELO	-0.249552	-0.0439001	0.0365272	0.188904	0.0638784	0.196737	-0.241411	0.330623	0.535827	-0.0212291	-0.0552702	-0.067272	0.0273198	0.0418376	-0.0313727	0.0267942	0.0639586	0.541187	0.326463	-0.0224367	0.0154604	0.010293	0.0109394	-0.0646932	0.237918
LACC1	-0.150018	-0.0284203	0.0119396	-0.068871	-0.125135	-0.119412	-0.049322	0.00850492	0.829979	0.168045	-0.108967	-0.0849587	-0.0364199	-0.0391119	-0.0163799	-0.0154323	-0.0307188	-0.0515364	0.0459929	-0.0664088	0.165685	-0.0251533	-0.0367349	0.232865	0.175296
TAPT1-AS1	-0.0850428	-0.109599	0.408665	-0.0563496	0.63076	0.265383	0.320673	-0.0639793	-0.122132	0.00196926	-0.116439	0.122252	0.00451563	-0.0203015	-0.183506	-0.171558	-0.113698	0.097688	-0.305071	-0.1009	-0.206987	-0.104562	-0.118811	-0.115398	0.0132159
C3orf30	0.0103582	0.113444	0.0620257	-0.0950396	0.00497753	0.0205294	-0.860234	-0.0278122	-0.0244741	0.0492639	-0.0449288	0.0118259	0.277506	0.326901	0.198256	0.246648	0.249428	0.295164	0.970286	0.0978084	0.145987	0.106912	0.0806301	0.10154	-0.078099
RANBP3L	0.000635861	0.094907	0.0532496	-0.0874145	-0.0186684	-0.0332599	-0.89389	-0.060048	-0.0268551	0.0912019	-0.0380658	-0.00482958	0.2506	0.288129	0.155699	0.244197	0.212758	0.260449	0.952194	0.0799473	0.140887	0.112691	0.0536625	0.0719049	-0.0906779
SNX13	0.172118	-0.0726557	-0.065561	-0.100262	-0.0513345	-0.0626877	-0.617637	-0.110384	0.0641593	0.0447776	-0.120918	-0.103774	-0.0102603	0.0568992	-0.00414449	-0.0385702	-0.0302772	-0.0670891	0.411109	-0.0877748	-0.0128858	-0.106566	-0.0248228	-0.093993	-0.240442
KDM1B	-0.0116795	0.018169	0.0355792	0.0391536	0.0346671	0.0297158	-0.643128	0.00631993	0.0282939	0.0770228	-0.0181881	-0.0239572	0.124362	0.23655	0.103486	0.0741149	0.102307	0.0651178	0.622458	-0.00567121	0.0597111	0.00268592	0.0580878	-0.00309611	-0.0446285
ATP6V0D2	-0.0422652	0.0801852	0.0848848	0.0666958	0.015293	0.0411862	-0.648874	0.0402049	0.0606641	0.0944675	-0.00663048	0.0067422	0.212519	0.260788	0.184166	0.1801	0.19156	0.188846	0.754374	0.0509234	0.106335	0.0825885	0.0900038	0.060282	0.0119503
LHX4	0.15363	0.148062	0.11261	0.0283493	-0.149338	-0.185193	-0.570302	-0.0508206	-0.292242	-0.0170668	-0.30907	-0.00339341	0.360716	0.273509	0.280176	0.317587	0.334268	0.427367	0.762037	0.0971013	0.127707	0.13218	-0.0329255	0.0893342	-0.158649
CEP19	0.0294959	-0.0228317	-0.0452588	-0.0642232	-0.0239883	-0.0401584	-0.28022	-0.083372	-0.0400002	0.00642519	-0.0599247	-0.0301789	0.0565882	0.0941841	0.0353579	0.222086	0.0361437	0.0459663	0.325941	-0.00608324	0.0187513	-0.00394689	-0.0305745	-0.0298198	-0.142513
DNAH11	-0.0565907	0.169581	0.0738601	0.010051	0.100099	0.0191915	-0.550278	-0.00485759	0.0200938	0.104547	-0.0151367	-0.000923545	0.156585	0.232137	0.145663	0.193751	0.176593	0.216055	0.729553	0.0762872	0.100748	0.112222	0.0601499	0.115403	0.0188378
PROSER3	-0.364605	0.319922	-0.0271832	-0.0116021	0.0396681	-0.0176861	0.1137	0.33273	-0.0520935	-0.0337928	0.563786	0.0164238	-0.0851943	-0.122856	-0.080028	-0.0418616	0.0137903	0.527292	-0.00240632	-0.0228959	0.302619	0.040824	0.304142	0.0729306	0.466736
ADPRHL1	-0.0709877	0.0454339	0.0214565	-0.00160827	-0.0823938	-0.0397783	-0.409926	-0.011028	0.0144485	0.104852	0.0230096	-0.0247887	0.139964	0.169716	0.160739	0.674748	0.129147	0.144917	0.581432	0.0669056	0.100038	0.0640959	0.17972	0.0786292	0.0534052
SYNRG	-0.118908	-0.0295196	-0.0213192	-0.0640041	0.109694	0.73868	-0.474986	0.0884584	-0.00990997	-0.0796644	-0.100065	-0.0467295	0.069221	0.159902	0.0219697	0.0237733	0.0484897	0.0504013	0.431007	-0.0388467	-0.0151866	-0.0311944	0.0102559	-0.0217432	0.00381732
CDH24	-0.0649321	-0.0320528	-0.0323865	0.594426	-0.129013	-0.289582	-0.144734	-0.101148	-0.0767582	-0.0403531	-0.0391409	-0.00605865	0.0630641	0.531309	-0.0204045	-0.00229594	0.00503088	0.0264401	0.0962977	-0.0450995	-0.0420556	-0.0448813	-0.0262104	0.0770342	-0.0445003
SEPSECS	0.536944	-0.294976	-0.0520852	-0.186261	-0.355391	-0.385167	0.131759	-0.342376	-0.128068	0.121746	-0.0192741	-0.201446	-0.0901185	-0.175595	0.174086	-0.127608	-0.152187	-0.0262513	-0.172236	-0.162029	0.0439817	-0.335738	-0.215252	0.0260553	-0.508629
GRIK5	-0.0781382	0.195517	0.116142	-0.0340517	-0.0396978	-0.0641668	-0.624546	-0.018836	-0.00185719	0.0663423	0.00524584	0.0300498	0.367092	0.295257	0.286142	0.430762	0.363957	0.47606	0.915336	0.113415	0.170296	0.198056	0.0158445	0.130041	0.0449285
LRRN4	-0.161409	0.0524661	0.55969	0.051573	-0.0477658	-0.021332	0.00251156	-0.0208218	0.0058635	-0.00439773	0.0252106	-0.0342361	0.00574706	-0.00755895	0.0431078	0.798543	0.0747766	0.0744446	0.173264	0.00487849	0.0788739	0.00851432	0.0209878	0.0207658	0.213972
ZNF777	-0.750044	0.0445421	0.0241114	0.25937	0.302766	0.323175	0.493593	0.348629	0.151924	0.0940978	0.28974	0.215215	-0.178847	-0.269326	-0.0726937	0.0947547	0.14633	0.155747	-0.293774	0.0835215	0.245411	0.3407	0.191489	0.28016	0.785367
JPH2	0.00999346	0.101111	0.0342777	-0.0237946	0.0259935	-0.017445	-0.66702	-0.0353508	-0.0082266	0.0880802	0.02016	0.0250701	0.196533	0.229212	0.177072	0.167367	0.198237	0.226515	0.716472	0.0384224	0.118805	0.0858238	0.0311174	0.0550246	-0.0508815
PDE5A	0.0150789	-0.143065	-0.130418	-0.13031	-0.117661	-0.109808	-0.0952076	0.36637	-0.0489859	0.286137	-0.0681416	-0.133113	-0.0704432	-0.0911352	-0.123123	-0.0898319	-0.125484	-0.126833	-0.0230695	-0.12345	-0.0516908	-0.0988893	0.428447	-0.100916	-0.0373655
SH2D1B	-0.0220356	0.127805	0.0953579	-0.0886815	0.0623102	-0.0275644	-0.797838	0.00578108	0.154469	0.103219	-0.0985956	-0.00747659	0.314839	0.3083	0.157314	0.276401	0.251402	0.314014	0.939764	0.0689759	0.152638	0.111433	-0.0128453	0.103273	-0.0302559
SSTR3	-0.186512	0.00969097	-0.0316164	-0.0331557	-0.0750219	-0.104445	0.0543216	-0.0324387	-0.0181443	-0.0518269	0.813961	0.190312	-0.0456845	-0.0762405	0.546099	0.0241074	0.0241342	0.0651068	0.00799807	-0.0122684	0.0350684	0.0272737	-0.0392433	0.0123449	0.219318
ADAMTS19	-0.116411	-0.0308986	-0.0546388	-0.0607562	-0.0449525	0.00308868	-0.0147686	0.79891	0.000361733	-0.0633789	-0.0178175	-0.0598012	-0.0149819	-0.0448112	-0.0570313	-0.0325866	-0.0480408	-0.0504905	-0.00627126	-0.0480989	-0.0228991	-0.0213087	-0.0385404	-0.0440512	0.135338
DDX31	0.142612	0.0561707	-0.0537288	-0.230883	-0.214525	-0.164114	-0.364718	-0.0836407	-0.098187	0.00320492	-0.0525221	-0.00362401	0.210931	0.148838	0.142846	0.201832	0.142831	0.20501	0.516136	0.0153745	0.603252	0.103322	-0.00689494	0.0195694	-0.125757
UMODL1	-0.0854763	0.12578	0.0893836	0.00872538	0.0481372	0.000109382	-0.791876	-0.0636255	-0.00156388	-0.00779247	-0.00320677	-0.0081006	0.250377	0.30389	0.202763	0.254057	0.231932	0.263163	0.921661	0.0877637	0.22751	0.251956	0.0957109	0.10344	0.0295283
RASEF	-0.328505	0.126158	0.245849	0.400804	0.276404	0.350708	0.528075	0.273288	0.00475	-0.179235	0.114845	0.0429607	-0.230195	-0.183824	-0.131689	-0.0971045	-0.190904	0.181968	-0.436741	-0.192474	0.0649874	-0.154977	0.328268	0.088704	0.426107
PARD3B	0.0597563	0.041701	0.0438	-0.0106375	0.0177097	0.0321192	-0.706653	-0.0305656	-0.000766654	0.0672062	0.00208652	-0.00394388	0.161965	0.215837	0.147747	0.136494	0.175878	0.160403	0.735494	0.0331534	0.0721497	0.0202493	0.0355439	0.0210389	-0.0866261
DST	0.0249282	0.129933	0.0693067	-0.0884848	-0.0674278	-0.0830298	-0.856264	-0.046863	-0.00686602	0.0313174	-0.0738332	0.0116534	0.297032	0.271531	0.17847	0.287683	0.25366	0.302896	0.979631	0.098548	0.165798	0.136649	0.0404902	0.104423	-0.0820788
ZNF441	-0.0200563	0.00742127	0.0141896	-0.0374777	0.0410359	0.0039473	-0.806295	-0.0605062	-0.0320311	0.0605846	-0.0345089	0.0651836	0.09509	0.203688	0.0985186	0.0688058	0.0821286	0.0738218	0.712906	0.00268318	0.0692357	-0.0225912	0.0264953	-0.0071688	-0.097018
NEGR1	0.482228	-0.0711209	-0.110312	-0.164598	-0.135821	-0.173828	-0.377794	-0.139354	-0.109351	-0.0105744	-0.120515	-0.0559579	0.0418404	0.0303214	-0.0103812	0.13864	-0.0237454	-0.0235908	0.321281	-0.061201	-0.0272318	0.0221711	-0.105313	-0.100012	-0.351726
FCRL3	0.032165	0.158615	0.0934835	-0.151874	-0.15098	-0.207668	-0.702545	-0.0488182	-0.0425297	0.109665	0.00932595	0.0387	0.317355	0.287709	0.294048	0.399819	0.301145	0.444889	0.917471	0.156727	0.179039	0.172623	0.0543968	0.113235	-0.0499027
DCAF4L2	-0.0684018	0.147221	0.0947294	-0.0634435	0.0163976	-0.0821292	-0.766038	0.0462114	0.0273301	0.0975821	-0.00944088	0.00618004	0.305744	0.333635	0.228869	0.308363	0.28909	0.343775	0.957137	0.101708	0.158117	0.186908	0.059478	0.112484	0.0102585
STOX1	-0.100692	-0.00404702	-0.0379189	-0.0337683	-0.0240019	-0.0777095	-0.206747	-0.0277506	0.00665551	-0.0252281	0.0436516	0.00436099	0.0166228	0.0468005	0.0473501	0.0263384	0.0189578	0.0296625	0.301304	-0.00132715	0.911348	0.390774	0.0353962	0.0374471	0.171848
C20orf166-AS1	-0.0667747	0.0854021	0.080775	-0.0741646	-0.058307	-0.107771	-0.464436	-0.0475234	-0.00146792	0.127892	-0.0332046	-0.0240043	0.188825	0.252215	0.112083	0.171681	0.14264	0.691078	0.636559	0.0706777	0.100251	0.0983153	0.542436	0.0961822	0.0602618
ARL10	0.0647127	0.0091257	-0.0105519	-0.101298	-0.0815112	-0.0845871	-0.486404	-0.116216	-0.0596392	0.0290589	-0.0904071	-0.0656764	0.179457	0.206756	0.0554146	0.115771	0.0864472	0.138994	0.590728	0.0150299	0.0323453	0.0203407	0.00834476	-0.018254	-0.243498
RNFT2	-0.222544	0.15006	0.246238	-0.00335818	-0.0644032	-0.0359732	-0.263712	-0.0270172	0.0236501	0.0506729	0.0213668	-0.00618988	0.126752	0.0947276	0.39207	0.405251	0.221899	0.290553	0.528559	0.102642	0.0892005	0.123804	0.0898204	0.774085	0.263261
ANKFN1	0.533985	-0.0544422	-0.0630712	-0.0982007	-0.0836993	-0.0856027	-0.0223908	-0.117321	-0.0947163	-0.0698883	-0.114041	-0.0791335	-0.0196853	-0.0438963	-0.0455239	-0.0388231	-0.041296	-0.0438436	0.00610014	-0.0510928	-0.0730435	-0.0789141	-0.0784282	-0.055699	-0.34729
KRT78	0.101282	-0.115002	-0.0988886	-0.0593345	-0.094454	-0.0922024	-0.422833	-0.101941	-0.109628	-0.054147	-0.144352	-0.0616747	0.386632	0.454343	-0.0430033	-0.0576343	-0.052481	-0.0745839	0.249911	-0.101229	-0.115613	-0.100502	-0.064876	-0.137997	-0.300138
CCDC7	-0.0127138	0.0202678	0.0246245	-0.0330504	0.00772208	-0.0379045	-0.950627	-0.0838523	-0.0381323	0.0491828	-0.063309	0.141393	0.163316	0.234123	0.102742	0.110329	0.108839	0.12045	0.864079	0.0120453	0.105144	-0.00827279	0.0238409	0.0230121	-0.111046
ZNF41	-0.0342489	-0.0417344	-0.0385303	0.18782	-0.0543642	-0.0250063	-0.72285	-0.0930852	-0.039481	0.00817421	-0.0896746	-0.0285738	0.0443752	0.108048	7.70533e-05	-0.0104466	0.00339072	-0.0180006	0.514097	-0.0840994	0.0122571	-0.0738208	0.0028903	-0.070369	-0.0873249
ZNF512	0.627471	-0.0930384	-0.0889649	-0.196307	-0.228961	-0.125231	-0.316927	-0.292045	-0.113205	-0.0134774	-0.328196	-0.0207381	-0.16301	0.0821437	-0.177858	-0.249142	-0.27819	-0.231236	0.0647595	-0.189166	-0.264266	-0.189596	-0.0894576	-0.170795	-0.623926
AMMECR1	-0.0258814	0.0919189	0.0416688	-0.031235	-0.0275779	-0.0579851	-0.709174	-0.0281011	-0.00870859	0.020129	-0.0445491	-0.0360642	0.22982	0.19812	0.157301	0.231029	0.208408	0.239002	0.768853	0.0257223	0.0971494	0.0773397	-0.00410826	0.0399223	-0.0376799
FAM117B	-0.305379	0.286346	-0.137055	0.0505682	0.00378117	0.107061	0.763336	0.0152087	0.106512	0.0261216	0.216785	-0.00218939	-0.288901	-0.444232	-0.0552335	-0.055859	-0.0317062	0.00975938	-0.613843	0.116686	0.101106	0.224126	0.0638718	0.364053	0.477209
ZNF583	-0.196467	0.0217859	-0.028908	-0.0143518	-0.0572428	-0.0493148	-0.0917251	-0.0337213	-0.0503544	-0.0229948	0.84183	0.120623	-0.00330787	-0.00932358	0.00997421	0.295201	0.257671	0.0716273	0.165844	0.154235	0.0651768	0.03444	-0.0136395	0.0323567	0.238092
OXER1	0.510362	-0.0756016	-0.103136	-0.129455	-0.131947	-0.151156	-0.0318043	-0.150628	-0.136986	-0.097368	-0.144546	-0.105545	0.00461296	0.0168443	-0.0431098	-0.020556	-0.0491313	-0.0466199	0.0139824	-0.0595982	-0.101243	-0.0845838	-0.11528	-0.0848389	-0.417698
LUZP1	0.0219994	0.115943	0.0484082	0.0650268	-0.0575096	0.0834987	-0.820443	0.0301478	-0.0350782	-0.0272286	-0.060085	0.00588332	0.280934	0.271182	0.155094	0.238285	0.242437	0.290486	0.95083	0.0757405	0.139438	0.116617	0.00202158	0.0794637	-0.0708729
ZNF75D	-0.228549	-0.0460868	-0.109048	-0.139754	0.526615	-0.126187	0.106688	-0.0731254	0.00754265	0.00994892	0.0333659	-0.0637244	-0.15012	-0.172439	0.2221	-0.0737714	-0.106917	-0.0223657	-0.166279	-0.0781382	0.382117	-0.0307244	0.483949	0.0606792	0.256656
LINC00052	-0.0578839	0.148691	0.0724898	-0.0596828	-0.0582445	-0.092967	-0.682446	0.27059	0.00651777	0.0257524	-0.0361889	-0.000895473	0.30078	0.241635	0.245257	0.323483	0.27979	0.423616	0.909413	0.107397	0.153604	0.161254	0.0222908	0.107837	0.0387457
BRWD1	0.403803	-0.323885	-0.0819711	-0.148986	-0.0888233	-0.140488	0.243754	0.0375799	-0.161063	-0.0917953	-0.144543	-0.0483669	-0.305723	-0.285236	-0.359038	-0.184701	-0.280074	-0.192702	-0.291071	0.171146	0.204447	-0.0211188	-0.286955	0.0433851	-0.332348
CCDC89	-0.0190431	0.0604821	0.0643547	-0.0315115	0.0801483	-0.0243711	-0.859519	-0.0751649	-0.0786705	0.0729954	0.0185332	0.0179146	0.181864	0.247844	0.140533	0.138915	0.160359	0.179214	0.846053	0.0628307	0.118212	0.0552234	0.040651	0.039024	-0.0857699
ZNF572	-0.294624	-0.0821737	-0.0837835	-0.0845849	0.000143808	0.51985	0.286792	0.565245	0.348862	-0.147709	-0.00560451	0.116618	-0.150298	-0.195794	-0.132618	-0.122715	-0.133909	-0.105927	-0.250505	0.0598459	0.454087	-0.0233737	0.000973162	-0.0435298	0.340504
RMDN2	-0.0199036	-0.0331464	0.0369823	-0.119931	0.045537	-0.0125775	-0.49167	0.0226306	0.393116	0.0832393	-0.0423939	-0.0328611	0.127625	0.215662	0.125118	0.064529	0.0987936	0.0672541	0.577142	-0.0260845	0.0604161	0.0235215	0.0485133	-0.00463717	-0.0820419
ADAMTS18	-0.182516	0.131268	0.0566015	0.0866146	0.0702284	0.0489068	-0.339451	0.0310259	0.0571133	-0.0401246	-0.0629714	-0.0734295	0.231658	0.215002	0.0834671	0.214537	0.914314	0.32497	0.527394	0.0607599	0.0833903	0.0855412	0.0627767	0.0591213	0.176128
PCDHAC1	0.124529	0.0975732	0.0281292	-0.114502	-0.0208946	-0.066856	-0.627006	-0.0645181	-0.0267798	-0.00403552	-0.0431419	-0.000925039	0.277701	0.283391	0.203817	0.275386	0.26372	0.584805	0.834386	0.0679599	0.117237	0.108785	0.0192652	0.0683844	-0.134309
HIPK4	-0.00543528	-0.0378494	-0.00529367	0.098984	-0.0424237	-0.0474728	-0.455014	0.273407	-0.140102	-0.0434903	-0.160719	0.0294912	0.131348	0.10677	-0.0258004	0.057671	0.0408965	0.135208	0.401926	-0.0194671	0.0397151	-0.0290154	0.0143767	-0.0103431	-0.0547276
FAM124A	0.018743	0.174889	-0.0430828	-0.0683018	-0.0840774	-0.0663748	0.170139	-0.0480444	0.36367	0.0189967	0.0520849	-0.0762621	-0.0572547	-0.118288	0.00278927	0.35875	0.417059	0.391879	-0.0362759	-0.112972	-0.0743898	-0.0897858	-0.0896255	-0.0573459	0.125383
NKAIN3	0.0188534	0.0968727	0.0553484	-0.121335	-0.139022	-0.184327	-0.502362	-0.0327663	-0.0357483	0.0932162	-0.0465143	-0.00717449	0.230289	0.242912	0.175639	0.689678	0.219134	0.276002	0.721743	0.457412	0.113864	0.117753	0.0384554	0.0876849	-0.00852097
ITIH5	0.089351	-0.104085	-0.0606066	-0.136268	0.294142	-0.0941261	-0.37887	-0.121157	-0.0905813	0.233427	-0.00647029	0.396033	-0.0171565	-0.0256601	0.188935	0.082936	-0.051479	-0.0127495	0.254338	-0.12909	0.0059252	-0.0839129	-0.114379	-0.100891	-0.108672
FANCB	-0.245302	-0.020547	-0.086201	0.328494	-0.124138	-0.040288	0.0322795	-0.0541917	0.134322	-0.0894421	0.0372964	-0.0426568	-0.0711365	-0.0468613	-0.122004	-0.0245971	-0.0842967	-0.0484479	0.00137987	-0.0483881	0.736174	0.0911623	0.535813	0.0338945	0.277221
POMK	0.411344	0.0611213	-0.00150091	-0.16734	-0.184893	-0.261741	-0.587351	-0.116008	-0.119019	-0.0566115	-0.135965	-0.0315027	0.241946	0.22146	0.184345	0.200856	0.199371	0.193725	0.697606	0.0393992	0.0855276	0.0461193	-0.0732184	0.023374	-0.340826
ZNF709	-0.175211	0.284602	-0.0225579	-0.139628	-0.0587622	-0.0140466	-0.233316	0.221558	0.0296475	0.0119108	0.0972957	0.149176	-0.0077501	-0.0365355	0.798473	0.0743462	0.0687894	0.056305	0.310645	0.004012	0.311517	0.036036	-0.0766267	-0.000233397	0.216409
CCDC57	-0.173919	0.00756149	0.00515774	0.0614917	0.498915	0.013558	-0.517105	-0.000559909	0.00208682	0.400255	0.0116777	-0.0311497	0.103757	0.192389	0.0829135	0.0750514	0.316613	0.15627	0.550567	-0.00633995	0.035748	0.0209215	0.0424665	0.027266	0.107904
SMC1B	-0.0274768	0.0861202	0.0597686	-0.00262569	0.0402856	0.0588365	-0.79337	-0.0367034	-0.0247708	-0.152745	-0.0528534	-0.0262426	0.237207	0.259022	0.0145954	0.17389	0.165329	0.267677	0.81553	0.056676	0.116466	0.0513809	0.0502785	0.0565881	-0.0692069
BRWD3	-0.0560083	-0.0599066	-0.0116733	0.086906	-0.100078	0.026733	0.405481	0.375979	0.171277	0.174558	-0.00825838	0.285358	-0.0899292	-0.175811	0.0991681	-0.0217423	0.0818867	-0.00110537	-0.345507	-0.300547	0.0631032	-0.483345	0.0533027	0.196614	0.165074
ASB16	-0.0492797	0.0811182	0.0540222	0.026307	0.0087322	-0.0453083	-0.172423	-0.0447315	-0.0166597	0.0673531	-0.0102617	-0.0253857	0.0937762	0.112681	0.14404	0.114038	0.176497	0.968946	0.355723	0.0500867	0.0481674	0.0599071	0.0519847	0.0632537	0.0879959
MAGEE2	-0.0356549	0.158608	0.137093	-0.0818028	-0.0370639	-0.0954664	-0.640649	0.0150738	0.0102189	0.119193	-0.0554342	0.0393148	0.267897	0.230165	0.172313	0.278123	0.282612	0.474844	0.853327	0.129094	0.176995	0.330368	0.0317927	0.132961	0.0427314
ERVV-1	-0.0544766	0.107562	0.0982385	-0.00588641	0.106187	0.0131942	-0.550503	0.00969034	0.00752372	0.114704	-0.0135714	0.0591941	0.184257	0.163676	0.0320001	0.215029	0.262199	0.752417	0.724953	0.0820606	0.108596	0.100631	0.100236	0.111247	0.0788837
GAL3ST3	-0.044469	0.055043	0.0386122	-1.28086e-05	0.0169996	-0.0143522	-0.467227	-0.0136243	-0.0308994	0.0700677	-0.0410551	0.0202016	0.137246	0.164291	0.136091	0.131995	0.122845	0.136756	0.53627	0.0396521	0.059237	0.0914009	0.0307332	0.0327548	-0.00895587
FLJ30679	-0.0384134	0.0899167	0.045638	0.0136741	-0.034857	-0.0569916	-0.693224	-0.0621015	-0.0244401	0.0435013	-0.0699748	-0.0426445	0.197321	0.182781	0.119408	0.146306	0.193499	0.230686	0.737086	0.00862952	0.106921	0.0966313	0.0243974	0.0497861	-0.0377852
ALS2CR11	0.031723	0.126551	0.0837813	-0.115206	-0.103748	-0.146826	-0.864975	-0.0754818	0.024158	-0.00713851	-0.0908334	0.00439734	0.246069	0.222281	0.216358	0.241268	0.232044	0.259721	0.92926	0.0804381	0.178096	0.121646	0.07518	0.0657252	-0.0845345
UTS2R	-0.0393346	0.0569624	0.0120948	-0.0737604	-0.0160359	-0.102573	-0.820078	-0.0622257	-0.0697378	0.100306	-0.0420263	0.0246087	0.459426	0.370438	0.228448	0.300649	0.253903	0.334219	0.91995	-0.0293226	0.104344	0.110859	-0.00263521	0.0419029	-0.101727
USH1G	-0.0719092	-0.0508712	-0.0860482	0.172112	-0.07685	-0.0861859	-0.054302	-0.0997293	-0.0621169	-0.066034	-0.0744427	-0.111778	0.00805211	-0.00650046	-0.0919007	-0.0408807	-0.0536672	-0.0524938	-0.0123677	-0.0480163	0.0360894	-0.0290803	-0.0443783	-0.0414952	-0.0773518
SYN1	-0.0571817	0.033852	0.0393571	0.0362005	0.076969	0.014792	-0.559168	0.0124137	0.0428506	0.385298	0.0278105	0.00914925	0.128371	0.250921	0.151701	0.262374	0.143524	0.231597	0.649491	0.0306621	0.0595098	0.0290555	0.0565846	0.0249827	0.0258964
SLC23A3	-0.228592	-0.000457084	-0.0295824	-0.0465322	0.396148	0.425997	-0.260387	0.389013	0.207525	-0.0503222	-0.0993497	-0.0886192	0.573055	0.168031	-0.0227002	0.0228954	0.0547682	0.0500718	0.344839	-0.028831	-0.0200239	0.151127	0.0129447	-0.0264752	0.154792
CNOT6L	0.00621986	0.03704	0.0333328	-0.00313271	0.0332543	-0.00587891	-0.861868	-0.0480923	0.000904281	0.0623824	-0.0297902	0.090017	0.155244	0.255652	0.118588	0.0937176	0.119639	0.127233	0.809515	0.0174029	0.130616	0.0121636	0.0473695	0.00254873	-0.0976669
RHBDL3	-0.0731773	0.209101	0.0786521	-0.0419185	-0.0339187	-0.0875057	-0.577642	-0.0281964	-0.0132752	0.146502	0.0337461	0.0262081	0.329518	0.247466	0.251626	0.394163	0.36307	0.631366	0.880801	0.0928044	0.167297	0.194766	0.0251317	0.145591	0.0667736
ZNF718	-0.127504	-0.0915271	0.224951	-0.0956231	0.39094	-0.13965	0.0860635	-0.0958358	0.28828	-0.119818	-0.0606419	0.00494962	-0.218703	-0.19128	0.166212	-0.196133	-0.123928	-0.100265	-0.181961	0.00441696	0.409086	-0.0965878	-0.095439	-0.143269	0.137214
DIP2B	-0.270388	-0.00460017	-0.0189218	0.114082	0.503457	0.013636	-0.0742784	-0.0756152	-0.0767949	0.19126	0.324753	-0.0185807	-0.0111765	0.0146096	-0.0119915	0.0394358	0.212194	0.715424	0.156996	0.00743996	-0.0105076	0.0487821	0.132841	0.0699832	0.300308
SLC36A1	0.0403125	0.160183	0.0250599	-0.131096	-0.157457	-0.208538	-0.677973	-0.0322279	0.00878963	0.0686076	-0.0601737	0.0179266	0.375926	0.31192	0.276527	0.419277	0.271139	0.291386	0.905419	0.0914855	0.164385	0.166494	0.0457258	0.0946217	-0.0853341
SNRNP48	-0.433305	0.217634	-0.014487	0.148188	0.271774	-0.202887	0.277437	0.0972413	0.105278	-0.0864652	0.475434	-0.0668215	0.024521	-0.205465	0.167257	0.209922	0.360981	0.212297	-0.0849317	-0.0736606	0.0618278	-0.0314136	0.276575	0.247408	0.498231
ZNF560	0.0138209	0.141375	0.0759379	-0.0816259	-0.0723133	-0.183865	-0.799947	-0.0770902	-0.0168568	0.0233741	-0.0498238	0.00643623	0.291881	0.203128	0.189418	0.294167	0.245308	0.325172	0.927122	0.0840618	0.158832	0.136931	0.0166867	0.0981419	-0.0712392
RTTN	0.0235622	0.10061	0.0664477	-0.0322926	-0.0255793	-0.059035	-0.90161	-0.0466125	-0.000479008	0.0690816	-0.0596684	0.0464452	0.244764	0.290134	0.163192	0.215197	0.207644	0.245269	0.96753	0.084983	0.143819	0.0802702	0.0511047	0.0827855	-0.0908551
BTNL9	0.00588066	0.0408688	0.0133769	-0.0598859	0.0948851	-0.0321628	-0.669447	-0.0599058	0.00930587	0.0934858	-0.0545628	-0.0387806	0.12124	0.222077	0.0412551	0.0935243	0.123719	0.355481	0.653028	0.0415464	0.0910852	0.161153	0.0793303	0.0297945	-0.0415536
PUS10	0.0731647	-0.047177	-0.0957812	-0.156454	-0.200645	-0.246151	0.110258	-0.119448	-0.0789648	0.0489402	0.238331	-0.0600821	0.0174072	-0.0606777	-0.0557386	0.525375	-0.0669132	-0.0161397	0.0358098	-0.0127299	-0.0182981	-0.0676643	0.154641	0.493131	-0.0136008
PLCXD2	-0.0682145	0.0714535	0.0524326	0.0167511	0.0583506	0.0191993	-0.0357804	-0.0195269	-0.00112961	0.0353089	0.00489588	-0.035577	0.051027	0.0506909	0.102864	0.0853806	0.134477	0.972981	0.219851	0.0368597	0.0170176	0.0511254	0.0365966	0.0549748	0.124487
C21orf128	-0.0875098	0.168505	0.0672184	-0.0612619	-0.0329905	-0.114784	-0.477732	-0.0126289	0.00721349	0.0272717	-0.034346	-0.0122284	0.274618	0.230913	0.190897	0.318621	0.267751	0.367746	0.766988	0.11819	0.18167	0.664519	0.0831832	0.127979	0.118254
LMLN	-0.0335114	0.0324379	-0.0248016	-0.00913459	0.052668	-0.0122269	-0.857813	-0.0384604	-0.0311816	-0.0481987	-0.0269695	0.0165176	0.181916	0.233973	0.0690803	0.206265	0.146437	0.160293	0.82281	0.0110652	0.114459	0.0312655	0.0276624	0.0183554	-0.0675182
RAD9B	-0.191647	-0.0257809	-0.0518469	-0.0264537	0.895717	0.0181586	-0.115003	-0.0409549	-0.0591552	-0.0619441	-0.00120695	-0.0292254	-0.0297459	-0.0487127	0.0177584	-0.024079	-0.0106257	0.0390212	0.0440186	-0.0285722	-0.011044	0.0251615	-0.016314	0.0266057	0.15987
ZNF555	-0.096039	0.0227935	-0.0409815	-0.0581785	-0.303766	-0.0218612	-0.0786673	0.134646	0.0828264	0.171803	-0.00808398	0.0924739	-0.115017	-0.0335074	-0.0699564	0.189808	-0.294335	-0.0452489	0.0566468	0.288067	0.00563188	-0.300427	0.0342935	0.212664	0.0247854
NYAP1	0.0284334	0.0681925	0.0783295	0.0340195	-0.0465873	-0.215492	-0.726545	-0.0276882	0.048276	0.163586	-0.0337954	0.00683779	0.195703	0.298419	0.195425	0.167051	0.189009	0.310642	0.778765	0.096593	0.115429	0.067778	0.0896695	0.0493492	-0.0716869
SGK494	-0.422905	-0.0340514	0.0265702	0.341641	0.256649	0.443278	0.460937	0.267869	0.122826	0.166469	0.338078	-0.00105181	-0.204453	-0.274098	-0.170856	-0.127281	-0.0419218	0.361238	-0.329598	0.106572	-0.0460433	0.332149	0.00859608	-0.0110349	0.511867
MRGPRX3	-0.0462273	0.0734356	0.0355667	-0.017272	0.00413976	-0.0257918	-0.80515	-0.057847	-0.0242692	0.0588069	-0.0279069	0.00735363	0.244909	0.249632	0.155995	0.200201	0.195022	0.272695	0.826298	0.0256605	0.112889	0.0954842	0.0130621	0.041156	-0.035064
ABCA13	-0.0740206	0.14105	0.137809	-0.0275944	0.133244	0.0565748	-0.75144	-0.0836764	-0.0262709	-0.0900659	-0.0717025	-0.0177579	0.229373	0.145576	0.258337	0.245056	0.241874	0.494886	0.903124	0.10463	0.145439	0.107857	0.184548	0.116218	0.0309369
GPR128	0.546095	-0.229219	-0.251684	-0.29898	-0.181806	-0.0416374	0.372628	-0.0107053	0.0174237	-0.229132	-0.221142	-0.162933	0.0164067	-0.276676	0.119301	0.0319416	-0.220475	-0.0916155	-0.288138	0.0636542	0.0885412	-0.192683	0.0546178	-0.208322	-0.400817
CSF3R	-0.0410434	0.0722963	0.00313325	-0.0178265	0.00991402	-0.0354597	-0.0199309	-0.00742415	-0.0493082	0.0644159	0.0634716	-0.0101149	0.0645293	0.0689368	0.113143	0.917612	0.131803	0.40987	0.255198	0.0450564	0.0198778	0.031675	0.0252359	0.0426251	0.165162
C17orf77	-0.0880396	0.000201207	-0.00199385	-0.0571425	0.00120265	-0.0643392	-0.54667	-0.0461682	0.0124097	0.852376	0.0243151	0.0666645	0.097437	0.122709	0.0688773	0.0723961	0.072944	0.0836892	0.513595	-0.0147098	0.0580748	0.00172641	-0.0149718	-0.00216355	0.00469963
DUSP5P1	-0.23087	0.81092	0.0119219	-0.0130408	0.252678	-0.0269682	0.0930888	-0.0193107	0.0233194	-0.0412876	-0.0463711	-0.106143	-0.0313638	-0.039761	-0.00818295	0.0161699	0.0525239	0.192833	0.0771806	0.0170142	0.042368	0.526456	0.0146968	0.264592	0.367248
DGKH	-0.363811	0.00990162	0.357476	0.432154	-0.102968	-0.0564282	0.422426	0.0397165	0.448858	0.0256979	-0.0258412	0.111837	-0.177939	-0.313232	0.126131	-0.14012	-0.140713	-0.076785	-0.321141	-0.125231	0.266505	0.194596	0.297635	0.322738	0.482104
TMEM182	0.0791464	-0.0532302	-0.10909	-0.0624768	-0.0914657	-0.0587344	-0.0210112	-0.0726532	-0.0856071	-0.0527693	-0.0319259	-0.0895017	-0.0384792	-0.0369057	-0.0664349	-0.0154826	-0.0606011	-0.0290598	0.0588331	-0.0459333	0.0238295	0.752616	0.0987399	-0.0207499	-0.00654353
C16orf46	0.000569471	0.121697	0.0457228	-0.132448	0.0495204	-0.147677	-0.775729	-0.023639	-0.0225571	0.0681815	-0.0096742	0.0232362	0.307556	0.309383	0.226159	0.309006	0.260498	0.355077	0.931058	0.0841879	0.148693	0.179667	-0.0231505	0.0816181	-0.0684701
LSM14B	-0.148254	0.223243	0.0564897	0.0215406	0.0693	0.0239558	0.0540324	-0.0140074	0.0258854	0.214556	0.105954	-0.00156965	0.0192161	0.0204136	0.0873307	0.0618678	0.121417	0.931125	0.16325	0.0317794	0.0155301	0.0566958	0.026704	0.0561172	0.213826
CASP8	-0.11876	0.0449116	-0.00786503	-0.0369791	-0.0185603	-0.0671783	-0.0654626	-0.020665	0.0228313	-0.0128898	0.0681081	0.0105042	0.0230992	-0.0298256	0.0700941	0.0737859	0.0701719	0.180916	0.256127	0.0202497	0.927347	0.169759	0.0322124	0.0665255	0.194537
PLB1	0.00612844	0.102125	0.0530092	0.00143119	0.0165148	-0.0188959	-0.870091	-0.0156762	0.0166356	0.0123905	-0.0233818	0.0341368	0.246655	0.306836	0.189893	0.216252	0.224934	0.240136	0.951124	0.0866882	0.158796	0.0952289	0.0700531	0.0750652	-0.0570225
C20orf197	-0.0636365	0.131091	0.0577842	-0.0565831	-0.0847276	-0.123257	-0.790934	-0.0599726	-0.0159729	0.00562056	0.302024	0.16389	0.231827	0.222621	0.172292	0.25771	0.231363	0.298993	0.910073	0.0765202	0.176096	0.131964	0.0357121	0.0901648	0.0211872
SLC5A3	-0.295828	-0.0339442	-0.0654673	-0.059109	0.68157	0.103662	0.125357	0.11932	-0.0322427	0.320575	0.0710396	0.0142048	-0.0806372	-0.0908765	0.00153689	0.518461	-0.0154269	0.225414	-0.0456623	-0.0412015	-0.00276228	0.030337	0.108725	0.0221523	0.349426
KIF19	-0.00921801	0.0453762	0.0535004	0.0809246	0.0214868	0.0296216	-0.59553	0.0159871	0.0355149	0.0820959	-0.00488558	-0.000219849	0.16606	0.269518	0.14295	0.116721	0.144522	0.134424	0.651024	0.0326053	0.0806597	0.0380074	0.0617026	0.0289171	-0.025025
SLFNL1	-0.0127727	0.0252971	0.279174	-0.0547819	-0.0491089	-0.00629902	-0.621873	-0.0349098	-0.00966935	-0.036163	-0.126269	-0.0644261	0.0986264	0.141437	0.0136922	0.0611374	0.0645598	0.061917	0.540394	-0.0286426	0.0279795	0.0219104	-0.0248827	-0.0241868	-0.0667158
GPR82	-0.0447449	0.145079	0.087576	0.0398382	-0.0425736	-0.112241	-0.791066	-0.140248	0.0571841	0.154803	-0.0166115	0.012529	0.312923	0.265486	0.270356	0.335962	0.280261	0.342002	0.947161	0.0603164	0.173092	0.136292	0.0325341	0.0960417	-0.0221137
RIBC1	-0.0206286	0.183351	0.143435	-0.0333827	-0.0752563	-0.117599	-0.700041	-0.0599803	0.0291838	0.0368314	-0.0535281	0.00539603	0.349224	0.266501	0.250875	0.360067	0.347183	0.406169	0.932387	0.0896901	0.158138	0.188763	0.00155657	0.123279	-0.0197656
OXGR1	0.0189224	0.125324	0.0763846	0.0360592	0.0404724	-0.0367933	-0.76249	-0.0724403	0.0390138	-0.0313166	-0.103667	-0.00479358	0.316015	0.297014	0.25682	0.28961	0.283852	0.343596	0.934321	0.0822149	0.146071	0.130892	-0.0406606	0.0745792	-0.0665808
CDC14C	-0.0159098	0.0558486	0.0472701	-0.0108129	0.0121918	0.0116589	-0.877731	-0.0221254	0.0483424	0.0809236	0.00132367	0.0349928	0.18758	0.274391	0.145111	0.145143	0.15759	0.154713	0.888664	0.0412914	0.116318	0.0492043	0.0632758	0.048421	-0.0566601
SULT1C4	-0.192721	0.00588847	-0.0106765	-0.0437242	-0.0505847	-0.035904	0.142358	0.0575968	0.790852	-0.074487	-0.0100823	-0.0251282	-0.0728926	-0.0928582	-0.0339107	-0.0470215	-0.0537268	-0.0800555	-0.0867115	-0.0614841	0.586729	0.0585152	-0.0248398	-0.00999484	0.269291
TEAD1	-0.019617	-0.0115927	-0.00170867	-0.00740546	0.0334225	-0.0259092	-0.566889	-0.0803609	-0.0472086	0.0152443	-0.0388596	0.0297763	0.0702073	0.132386	0.043711	-0.0136806	-0.00769167	0.0502379	0.409002	-0.0310259	0.0481729	-0.00329691	0.00613302	-0.0783102	-0.0641534
POU5F2	-0.096328	0.149498	0.105637	-0.0826801	0.0851207	-0.135631	-0.361203	-0.0655731	-0.0724225	0.0899533	0.0170334	-0.00733031	0.224351	0.202117	0.149755	0.289337	0.253204	0.870093	0.641982	0.120482	0.108344	0.156298	0.113249	0.328097	0.115549
RXFP2	-0.0127612	0.172178	0.0879438	-0.0826005	-0.0778385	-0.126962	-0.742461	-0.0475498	-0.00617725	0.115386	-0.00944366	0.0240031	0.330875	0.269931	0.269907	0.355651	0.325017	0.394124	0.966267	0.122374	0.173729	0.192312	0.0522251	0.12416	-0.0212314
BEND7	0.0164894	0.173929	0.0910738	-0.147979	-0.0536424	-0.11309	-0.733954	-0.0444061	-0.0444328	0.0471345	-0.0449915	0.0136689	0.346036	0.306187	0.181481	0.353252	0.310533	0.399054	0.958734	0.132921	0.157983	0.182162	0.0755141	0.115393	-0.0644145
SLC18A2	-0.1018	0.90329	0.0449819	-0.0191575	-0.0243303	-0.0380509	-0.14663	-0.0414188	0.0207429	-0.00238768	-0.0768453	-0.0498761	0.0319482	0.0356955	0.0390664	0.0468694	0.0612134	0.0884623	0.238978	0.00254838	0.0244763	0.0652837	-0.0145955	0.00766175	0.150922
SSMEM1	-0.0890148	0.121257	0.0854147	0.0309255	0.0422484	-0.146292	-0.647491	-0.0171708	0.0514329	0.141017	0.0223928	0.000423241	0.222322	0.292581	0.227884	0.267341	0.238993	0.596294	0.867805	0.105199	0.204724	0.114627	0.105215	0.189043	0.059712
MAB21L3	0.0902665	-0.101706	-0.0785664	-0.0372695	-0.0558644	-0.061689	-0.527842	-0.10326	-0.0791642	-0.025539	-0.109277	-0.0631659	0.0364127	0.203038	-0.0204541	-0.0550528	-0.0296694	-0.059553	0.334285	-0.0988409	-0.048645	-0.0790591	-0.0446263	-0.121295	-0.224397
LOC285696	-0.117408	0.100296	0.0139009	0.0175037	0.340549	0.0525579	-0.77903	0.0116475	-0.0255114	0.0965086	-0.0439008	-0.00761762	0.271251	0.307853	0.199797	0.238292	0.231132	0.298775	0.885176	0.0668735	0.130714	0.139812	0.0950798	0.0948292	0.0434732
MIER3	0.0301623	0.145245	0.0115512	-0.0726531	-0.0877795	-0.316944	-0.642423	-0.0776267	0.04001	0.0565628	0.00650262	0.0189074	0.288929	0.239693	0.238898	0.3177	0.286151	0.37655	0.850398	0.0739179	0.161297	0.161976	0.0200743	0.090832	-0.0615166
SDE2	-0.174436	0.0936062	0.101108	-0.0697199	0.224919	0.212915	0.485571	0.0656517	0.0839268	-0.187566	-0.0719312	-0.0180987	-0.18413	-0.283758	-0.168999	0.076505	0.365564	-0.00683095	-0.320888	0.010105	0.177104	-0.0591663	0.117185	0.443296	0.311501
UROC1	-0.0999595	0.0868219	0.0403047	0.0754429	0.0101242	0.000385102	-0.766418	0.0291309	0.0163871	0.00284719	0.0112546	0.0948425	0.205961	0.164294	0.184945	0.304774	0.207675	0.23489	0.859008	0.0799094	0.14963	0.087951	0.0365749	0.147526	0.0668185
PCDH15	-0.0170602	0.112669	0.065132	-0.0664101	-0.0591208	-0.0864053	-0.820741	-0.0732312	-0.0158161	0.0151798	-0.0640395	0.0517489	0.252508	0.239843	0.170263	0.265865	0.228118	0.311361	0.909746	0.0701474	0.136848	0.133552	0.0258794	0.0872055	-0.0570389
TNRC6A	-0.0713523	0.172873	0.0752825	0.0232081	0.0242306	-0.0903307	-0.680335	-0.0269916	0.0247361	0.0360317	0.018441	0.0161173	0.329806	0.281561	0.223468	0.33131	0.323711	0.411446	0.910353	0.104248	0.17182	0.172401	0.0163505	0.118302	0.0211949
KCNA6	-0.069489	0.0909051	0.032734	-0.0316731	0.0146668	-0.0473643	-0.467072	0.149434	-0.0144521	0.0369335	-0.047893	-0.00569767	0.186276	0.183504	0.119689	0.1889	0.175087	0.256704	0.654563	0.0505226	0.0968346	0.087639	0.0194327	0.0460581	0.00910675
ARID2	0.294176	-0.231453	-0.280955	-0.0702482	0.369659	0.254598	0.206583	-0.178111	-0.25904	-0.206262	0.0612062	-0.147634	-0.160794	-0.13124	-0.327801	-0.283684	-0.254474	-0.199677	-0.385362	-0.249501	-0.195722	-0.158776	-0.219095	-0.254466	-0.361157
AMER3	-0.0367187	0.0692131	0.10208	-0.000153565	0.0145589	0.000376279	-0.532415	-0.0151742	-0.0116207	0.0624145	-0.0829237	-0.0295157	0.880915	0.228861	0.12499	0.159889	0.179982	0.197335	0.646639	0.0222291	0.0265938	0.0358853	0.0184483	0.0262715	-0.0800181
OTUD7A	-0.087084	0.163151	0.120272	-0.0151114	-0.0391798	-0.0413624	-0.684626	-0.00605346	0.00722598	0.0615939	-0.0123811	0.145704	0.316609	0.283322	0.244964	0.344447	0.310668	0.380645	0.906513	0.0868706	0.158112	0.15502	0.0182752	0.109033	0.0391652
ERVW-1	0.390053	-0.0489015	-0.0837552	-0.175653	-0.134571	-0.121557	0.0393968	-0.0924889	0.461875	-0.0886646	-0.162545	-0.111558	-0.0441471	-0.112741	-0.0536135	-0.0375266	-0.00718191	-0.063056	0.0241699	-0.0938441	0.0019966	-0.0705409	-0.107244	-0.0926633	-0.253537
LINC00889	-0.0964745	0.108222	0.0707027	0.0797088	-0.0044278	-0.0274363	-0.813146	-0.0698561	0.0564098	0.137511	0.00442101	0.0324789	0.261188	0.296295	0.242642	0.24534	0.240673	0.28871	0.923561	0.0924831	0.152001	0.136432	0.107517	0.181225	0.0307841
FBXL18	-0.152863	-0.0296944	-0.0202118	-0.0648265	-0.0146612	-0.0410706	-0.47443	-0.0340238	0.261417	0.0684303	0.0173354	0.0100583	0.00783722	0.0722259	0.100193	0.0117797	0.0143956	0.00299937	0.424254	-0.0366098	0.546949	-0.00462301	0.00959999	0.05374	0.0988665
C6orf195	-0.0213837	0.104015	0.0230276	0.035928	-0.0019045	-0.094055	-0.821513	0.00414723	0.0237477	0.0804311	-0.0133166	0.0096266	0.244936	0.336575	0.179279	0.216957	0.21461	0.243377	0.929628	0.0725874	0.1589	0.213302	0.0819696	0.076897	-0.0232723
PNPLA1	-0.0195024	0.0777471	0.0621777	-0.0325259	0.0510467	0.00304322	-0.719578	-0.0299155	0.0155502	0.0574548	-0.00432398	0.000470934	0.177504	0.249821	0.158486	0.185165	0.173851	0.253327	0.758008	0.0705176	0.126571	0.0705521	0.0447861	0.0509508	-0.0423141
DEPDC4	-0.145957	0.125577	0.0715075	-0.118425	0.00985558	-0.0456161	-0.622314	0.0324608	-0.00872467	0.0705344	0.0934115	0.0577943	0.217448	0.101788	0.252156	0.280123	0.223748	0.32347	0.834361	0.117833	0.478164	0.163357	0.0680468	0.124032	0.122074
COX6B2	-0.106148	0.0172796	0.0424319	0.645936	0.0291579	0.0600895	-0.461552	0.00723094	-0.0135479	0.059836	-0.0249086	-0.0246333	0.203548	0.172866	0.068064	0.037274	0.0830051	0.0635615	0.485843	-0.0221805	0.0355218	-0.00403873	0.0543127	0.00472308	0.0546614
FAM129C	-0.127702	0.158024	0.117121	0.00367431	0.0433891	-0.0133001	-0.662682	0.0195061	0.0240778	0.0138384	0.0239704	0.275998	0.336434	0.303209	0.200524	0.362311	0.405583	0.387975	0.895152	0.0676548	0.138949	0.176146	-0.0161753	0.113533	0.0836526
EPHA10	-0.0184719	0.153242	0.112406	-0.00558827	0.0143492	-0.0937033	-0.751565	-0.0498467	0.0028995	0.0464521	-0.0707139	-0.0131594	0.339592	0.322726	0.245562	0.351377	0.320365	0.435526	0.965416	0.112715	0.15767	0.156911	0.0256225	0.115966	-0.0297947
WDR64	-0.0547959	0.0879392	0.0641365	0.0227974	0.0766508	0.00122501	-0.354408	-0.0338222	0.00385381	0.0849091	-0.00835316	0.018547	0.150146	0.161123	0.13546	0.148161	0.196072	0.941495	0.546727	0.0509086	0.0580532	0.0678874	0.0337092	0.0616882	0.0739237
PRO2949	0.030309	0.0615391	0.0182232	-0.0202433	-0.0455117	-0.123239	-0.750804	-0.0946017	-0.0429826	0.0339078	-0.0871015	-0.0255746	0.194249	0.219158	0.122913	0.190309	0.154373	0.226592	0.806815	0.0509438	0.101457	0.0461168	0.0277241	0.0462289	-0.132844
BTBD9	-0.099175	0.0394833	0.00693657	-0.064637	-0.0540101	-0.14952	-0.369346	-0.0242716	-0.0730457	-0.028067	0.00187208	-0.0372321	0.0910612	0.0876463	0.0543864	0.165256	0.126497	0.167546	0.446019	0.0412858	0.123578	0.0503689	0.864564	0.0880269	0.0924368
HEATR9	-0.0540753	0.0887593	0.043715	-0.0517439	0.00654506	-0.000333862	-0.533868	-0.0244788	-0.0134082	0.00371177	-0.00489008	0.0100079	0.160348	0.200369	0.134904	0.165435	0.154248	0.213936	0.691964	0.076063	0.125071	0.0867909	0.0814844	0.278154	0.00755269
PARP15	-0.00646799	0.0666465	0.0450377	-0.0156327	-0.0640038	-0.0898345	-0.535463	-0.0665562	-0.0198319	0.00513234	-0.0351264	0.171252	0.123234	0.134779	0.0960406	0.121961	0.118393	0.155282	0.600102	0.0336866	0.0952314	0.0317697	-0.000128398	0.0211302	-0.0657892
ARHGAP42	-0.00166029	0.0554021	0.0460377	-0.00174606	0.0517948	-0.0118194	-0.910846	-0.0376058	0.00509256	0.0959618	-0.0337656	0.00780638	0.210276	0.300398	0.16045	0.17689	0.174976	0.187205	0.931498	0.0481947	0.114797	0.0492909	0.0709718	0.0486315	-0.0840319
LINC01101	-0.0916176	0.105807	0.0605315	-0.0191993	0.0257977	-0.0263895	-0.238507	-0.0376772	0.00976759	0.0390571	0.0213805	-0.00105676	0.101937	0.101517	0.443009	0.17154	0.205798	0.910449	0.446552	0.0650994	0.0577778	0.0863078	0.0286132	0.0805055	0.129945
MFSD2A	0.0772757	-0.117561	-0.122705	-0.0253811	0.325149	0.752028	0.153384	-0.000862797	-0.144341	-0.16584	-0.213663	-0.142101	0.0352472	-0.0469679	-0.164142	-0.139011	0.0980203	-0.0960083	-0.238926	-0.224629	-0.298716	-0.186784	-0.107131	-0.120178	-0.148827
ATM	-0.0572067	0.0509208	0.176324	0.053537	0.0804687	0.0378429	-0.713879	-0.0209589	-0.0205289	0.14264	-0.0159113	-0.0244566	0.172942	0.24142	0.123306	0.14178	0.171354	0.42168	0.789995	0.0364506	0.060542	0.0432895	0.0496719	0.0508303	-0.0114077
FAM26D	0.0222814	0.166064	0.088421	-0.0912558	-0.0561983	-0.121381	-0.696378	-0.0401324	0.0843222	0.0320385	-0.0571992	0.0194876	0.366419	0.255815	0.218268	0.345943	0.317848	0.393743	0.94525	0.120394	0.167351	0.205371	0.0395368	0.11932	-0.0416437
NPHP3	-0.167862	0.0518407	0.0434396	-0.00749521	0.0558819	0.0138285	-0.236994	0.0226737	0.357067	0.0400776	-0.0238875	0.10052	0.088966	0.0798157	0.107251	0.0977599	0.13283	0.767308	0.431859	0.0379049	0.0505976	0.281803	0.128678	0.0842839	0.210047
ATG9B	0.0245931	0.143647	0.0599638	-0.110876	-0.101647	-0.145461	-0.801339	0.00795862	-0.012406	0.095701	-0.0586396	0.0203227	0.315815	0.317177	0.251086	0.314077	0.297737	0.350672	0.976827	0.127036	0.172713	0.153047	0.0630994	0.153965	-0.0612848
CXorf58	-0.128481	0.0487425	0.00168956	-0.0168647	-0.07075	-0.0661595	-0.181277	-0.00390722	0.0124689	-0.0227124	0.0557964	0.0160501	0.0758359	0.0570501	0.0818549	0.113684	0.0916695	0.11319	0.340772	0.017407	0.942103	0.12626	0.0561899	0.0747633	0.175189
TFAP2B	0.0594271	0.138516	0.00390329	-0.210348	-0.0675581	-0.130072	-0.735777	-0.129378	-0.0173677	0.0377249	-0.165415	-0.0175519	0.326596	0.301798	0.144617	0.306276	0.273726	0.33019	0.89921	0.126636	0.151337	0.154809	0.0281418	0.114023	-0.152389
CCDC13	0.00126069	0.0289027	0.0325238	0.00317014	0.0571546	0.0158082	-0.568999	-0.0308378	-0.00160718	0.122433	-0.0179814	-0.00456586	0.135875	0.203249	0.150635	0.131735	0.142785	0.572493	0.657539	0.027349	0.0309625	-7.73902e-05	0.0415603	0.0194063	-0.030837
MRGPRX1	-0.0528096	0.0895521	0.564376	0.0167573	0.00140907	-0.0209222	-0.63499	-0.0355757	0.00718348	0.0442208	-0.0542191	-0.000878843	0.164123	0.183991	0.138316	0.153845	0.162951	0.214075	0.701961	0.0441301	0.0771019	0.0529897	0.0334977	0.0550694	-0.010517
HFE	0.267826	-0.0792387	-0.0669424	-0.122772	-0.169431	-0.12009	-0.563256	-0.175544	-0.122602	-0.0234762	-0.131406	-0.0245691	0.0730332	0.0841733	0.0225628	0.0163719	2.43432e-05	0.33525	0.524005	0.400959	0.00543675	-0.0959018	-0.0699833	0.0308925	-0.33047
RLN3	-0.0736808	0.155782	0.0656269	0.0378667	-0.00495206	-0.0568534	-0.715831	-0.00888594	0.0336323	0.0728574	-0.0405518	-0.00591765	0.306957	0.230596	0.224377	0.313934	0.294726	0.343528	0.926425	0.104658	0.178179	0.406467	0.0562663	0.114925	0.060753
CSMD1	-0.0214625	0.0467526	0.0470978	0.0466218	0.0283023	0.0210002	-0.647163	0.0148137	0.0334482	0.0893644	-0.00418147	-0.00821585	0.195109	0.271618	0.146909	0.121775	0.142787	0.127498	0.705142	0.0326089	0.0948018	0.152173	0.0731648	0.0370961	-0.0105341
MACF1	-0.23423	0.0425998	0.047488	0.575509	0.372387	0.129331	-0.0563575	-0.0170881	-0.0213847	-0.0634133	0.0169816	-0.0590834	-0.000472384	-0.00567149	0.0137879	-0.00154233	0.219539	0.598103	0.19473	-0.0139908	-0.000956249	0.0262373	0.0236571	0.0309427	0.256033
ADAMTS20	-0.0349394	0.138952	0.11654	-0.0824913	0.0561023	-0.0626245	-0.786068	-0.00610176	0.0120944	0.125769	-0.0476563	0.0144176	0.298731	0.31942	0.200705	0.289923	0.272759	0.329694	0.929354	0.1089	0.161693	0.150964	0.045663	0.104108	-0.0206658
SALL3	-0.0189751	0.0904204	0.0707612	0.0227576	0.0325306	-0.000413563	-0.661002	0.0181256	0.0435846	0.0881009	-0.00284356	-0.00104635	0.226549	0.276086	0.165302	0.207083	0.208109	0.216422	0.778476	0.0510087	0.116651	0.0873366	0.0654338	0.0648296	-0.00789845
AGBL4	-0.0204686	0.0900435	0.0489639	-0.0102096	0.0353903	-0.0655288	-0.873949	-0.0339292	0.00942376	0.0999407	-0.00174667	0.0364237	0.253686	0.287006	0.183613	0.204999	0.198832	0.243322	0.920213	0.073475	0.127853	0.0716792	0.0662892	0.0703231	-0.059807
FLJ13744	-0.130689	-0.0268425	-0.025564	-0.0212893	-0.0684	-0.0382486	0.103715	0.302108	-0.0294263	-0.0618899	0.0018152	-0.0474242	-0.0334025	-0.0652165	-0.0592093	-0.0120806	-0.0410849	-0.0206768	-0.0664774	0.919081	0.00207215	0.0203269	-0.0459674	0.0267099	0.122361
SLC17A8	0.00753681	0.0740374	0.0638945	-0.05764	0.0383385	-0.122059	-0.799669	-0.0780864	-0.00631896	0.0771024	-0.0490011	-0.00989813	0.229196	0.278678	0.166548	0.215762	0.186769	0.319815	0.896546	0.0995958	0.132294	0.0782253	0.06338	0.0785181	-0.11069
C11orf44	-0.0528627	0.151533	0.0938348	0.0588734	-0.0276899	-0.0694356	-0.72548	0.00603431	0.00631349	0.067015	-0.0259109	0.00920299	0.315642	0.358405	0.225488	0.356318	0.293748	0.470972	0.944669	0.094803	0.163528	0.178291	0.0494863	0.127891	0.0122756
SATB2-AS1	-0.0181601	0.120369	0.109048	0.0574243	-0.0516477	0.0463315	-0.797064	-0.0427725	0.012071	-0.033184	-0.0325559	0.00425414	0.290765	0.339121	0.213716	0.267831	0.251147	0.309247	0.943043	0.0735388	0.129233	0.0967066	-0.0222306	0.075371	-0.0624742
RBFOX1	-0.102705	0.0446109	-0.00640102	0.0258168	-0.0230568	0.0060985	0.0532913	0.0151372	0.0338478	-0.00941402	0.0203956	-0.0643592	0.00092404	0.000173486	0.0453419	0.0500318	0.957957	0.0580107	0.0416313	0.000418105	-0.00817656	0.00687263	-0.00868071	-0.0230042	0.158964
SLFN13	-0.0646505	-0.212523	0.225261	0.316255	0.210909	0.279142	0.0646508	0.327719	0.211318	-0.110388	-0.0328422	0.110946	-0.254068	-0.332024	-0.296531	-0.280666	-0.259337	-0.241687	-0.226096	-0.135852	-0.181171	-0.221784	-0.125531	0.191504	0.136459
C12orf40	0.0143373	0.119805	0.0232826	-0.0905589	0.00962142	-0.0560716	-0.862033	-0.0441032	-0.0535704	0.105548	-0.0340006	-0.00233738	0.278022	0.299868	0.199854	0.266298	0.254441	0.31425	0.979372	0.105827	0.142908	0.126276	0.053525	0.0915525	-0.087298
WDR65	0.0661558	-0.0367163	-0.0454734	-0.0774423	-0.0271493	-0.082042	-0.265623	-0.114597	-0.0999479	0.0282561	-0.117555	-0.0658069	0.127355	0.244987	0.0317635	0.0587845	0.0322422	0.125809	0.368439	0.00428961	-0.0397002	0.0346716	-0.0456542	0.0150316	-0.248364
C5orf64	0.0421836	0.147448	0.100558	-0.193881	0.0284118	-0.152417	-0.60321	-0.0225611	-0.0142217	-0.0449549	-0.148986	-0.00417844	0.357819	0.34858	0.1123	0.290896	0.279254	0.359908	0.834905	0.115887	0.129786	0.15091	0.134685	0.141649	-0.0796532
ADAMTS15	-0.0516051	0.192082	0.0136201	-0.184059	0.0100454	-0.0813816	-0.610676	0.00499861	0.0460305	0.0548709	0.041626	0.0311606	0.322374	0.297772	0.288214	0.41839	0.372185	0.552789	0.890424	0.0903582	0.142784	0.217602	0.0642874	0.155775	0.0529328
LY86-AS1	-0.0502966	0.121145	0.0535485	0.0293586	0.0362058	-0.0693365	-0.764833	-0.0129278	0.0379344	0.0180327	0.0191857	-0.00871808	0.275207	0.311416	0.209391	0.255871	0.441999	0.297149	0.920028	0.0888718	0.145978	0.147362	0.0860816	0.0947108	0.0200872
FLJ31713	-0.0319774	0.101675	0.0854888	0.0267513	0.019634	-0.011876	-0.754568	0.00976019	0.0468871	0.108076	0.00888408	0.0122995	0.257229	0.31204	0.190186	0.267342	0.233282	0.254687	0.888651	0.0853084	0.140207	0.126729	0.076057	0.0973626	-0.000433414
EDARADD	-0.0292248	0.0852978	0.0637698	-0.000112128	0.0634083	0.00601442	-0.684527	-0.0342276	-0.00866297	0.118798	-0.0111764	0.00561167	0.197033	0.235764	0.192645	0.211651	0.199761	0.257616	0.770339	0.0648409	0.117416	0.0862872	0.0535428	0.0564402	-0.0400518
CCDC171	0.0121461	0.0817779	0.0538085	-0.0542374	0.00790008	-0.0280238	-0.897898	-0.0470892	-0.00552877	0.0550459	-0.0685542	0.0143021	0.261183	0.27705	0.160907	0.199994	0.195008	0.223328	0.958443	0.0614916	0.130201	0.060166	0.0492015	0.09676	-0.0956838
CYP4Z2P	-0.047333	0.158657	0.117505	-0.0668233	-0.0696281	-0.187084	-0.761231	-0.031969	-0.0572956	0.122798	0.041859	0.0447038	0.274054	0.26604	0.270216	0.324873	0.265798	0.325762	0.951779	0.126404	0.178049	0.189387	0.0365225	0.120575	-0.0151998
C18orf15	-0.0973475	0.170887	0.117289	-0.0178688	-0.025884	-0.0214943	-0.637345	-0.0151399	-0.104149	0.0635271	0.0303375	0.0506196	0.343625	0.364302	0.285468	0.363142	0.338676	0.459586	0.897253	0.100563	0.149662	0.169767	0.106193	0.125971	0.0410158
MUC19	-0.0218648	0.138444	0.0979469	-0.0434643	-0.0769141	-0.131464	-0.762104	-0.0405068	-0.0145569	0.0913971	-0.0418884	0.0314544	0.329257	0.256904	0.243612	0.348081	0.288188	0.375554	0.96483	0.102478	0.177538	0.219595	0.040282	0.118132	-0.0218598
KLHDC7A	0.210634	0.0736023	-0.0273433	-0.149025	0.012948	-0.100312	-0.296232	-0.07043	-0.0447798	0.0502727	-0.0246344	-0.0564807	0.135876	0.146186	0.0609529	0.595235	0.177669	0.621668	0.508501	-0.0299852	0.0339652	0.0363906	0.0174596	0.0514059	-0.0703606
C11orf72	0.275665	-0.0605984	-0.0835454	-0.14305	0.343965	-0.0532385	0.0727052	-0.0551727	-0.0685774	-0.0910878	-0.198362	-0.117384	0.386761	-0.0442656	-0.0822141	-0.0479048	-0.0195684	0.00593131	-0.0487279	-0.069811	-0.0966251	-0.0248951	-0.10013	-0.0466195	-0.213824
AQP4-AS1	0.021609	0.139888	0.0801929	-0.0764184	-0.0715196	-0.105913	-0.842158	-0.0613571	-0.00895035	0.0181285	-0.0606092	0.00549985	0.310253	0.279308	0.196134	0.287769	0.280633	0.360588	0.985497	0.11298	0.166135	0.149633	0.0784354	0.104574	-0.0746352
CNTNAP4	-0.0247615	0.0537695	0.0243017	-0.0433365	0.0043365	0.00461394	-0.8032	-0.0416698	-0.015581	0.0275373	-0.0176759	0.0392984	0.170623	0.221677	0.136915	0.142188	0.142609	0.173595	0.802015	0.0318582	0.107948	0.0457436	0.0290357	0.024994	-0.0627909
FER1L6-AS1	-0.0618056	0.180739	0.0906731	-0.0978642	0.0611625	-0.0391548	-0.650161	-0.055677	-0.0369892	0.0565587	-0.0280869	0.00927511	0.353374	0.251791	0.234054	0.392876	0.3522	0.474366	0.917447	0.136455	0.1606	0.209945	0.00745386	0.146438	0.0199612
C1orf127	-0.0150434	0.0751009	0.0583484	0.0424995	0.0319876	-0.0209169	-0.621297	0.019105	0.0120647	0.107611	0.0034541	0.0185575	0.263819	0.319174	0.203876	0.228734	0.209566	0.225039	0.748161	0.0206217	0.114093	0.10313	0.0331154	0.00539108	-0.0216504
LOC100996634	-0.0604523	0.112273	0.0812166	0.0196509	-0.00739998	-0.155187	-0.781164	-0.0253945	0.0121575	0.106938	0.049093	0.0589879	0.226863	0.275206	0.212133	0.242178	0.224754	0.308914	0.887858	0.0630268	0.154781	0.101639	0.0680233	0.0778975	0.0106642
AGBL1	-0.0669729	0.0670825	0.0534478	0.0171912	0.0582311	0.0272417	-0.0452716	-0.0151331	0.00578496	0.0312642	0.00344938	-0.0372649	0.0448751	0.0482522	0.0966309	0.0792415	0.131647	0.9725	0.226798	0.0362944	0.0164777	0.048576	0.0367919	0.0534221	0.123356
FLJ34503	-0.0456133	0.158912	0.107237	-0.034388	-0.0531559	-0.0396165	-0.734049	0.00719856	0.0544869	0.0640191	-0.025677	0.020923	0.347245	0.317192	0.26284	0.366934	0.308523	0.370666	0.953558	0.100205	0.162267	0.184128	0.0352663	0.11981	0.00969086
LINC00304	0.0513422	0.0291353	0.325733	-0.0239147	-0.0682971	-0.088085	0.100695	-0.0612327	-0.0491126	-0.0803572	-0.105805	-0.0873768	0.0776646	-0.0411801	-0.0456375	-0.0316379	-0.0348918	-0.0160255	0.0168375	-0.0328021	0.0503966	0.656673	-0.0280791	-0.0344123	-0.00377794
CCDC79	-0.0308275	0.157956	0.0748489	-0.092071	-0.064692	-0.0496767	-0.714985	-0.0614173	-0.00584975	0.0897323	-0.0232853	0.02407	0.320315	0.303533	0.198215	0.39815	0.312836	0.45924	0.945136	0.105656	0.1552	0.216308	0.039809	0.115073	-0.0121436
MYO1H	-0.0535881	0.166664	0.0804232	-0.124902	-0.00659264	-0.177235	-0.733761	-0.0586999	0.0403805	0.0181374	0.00648865	0.00797507	0.292179	0.291501	0.249574	0.326704	0.309224	0.372064	0.9115	0.10774	0.164208	0.155904	0.0594889	0.113035	-0.000403297
ASB14	0.1928	0.0633385	0.0258702	-0.354275	-0.0101626	-0.0751338	-0.661484	-0.0615436	-0.0524665	0.0412561	-0.104869	-0.0354976	0.203079	0.207887	0.125096	0.188748	0.157499	0.179244	0.69669	0.0624381	0.087523	0.0674412	0.115038	0.0464663	-0.19991
RPTN	0.0101355	-0.0119988	-0.00218417	0.0360422	0.0130665	-0.00122912	-0.388664	-0.00366795	-0.000407566	0.0344923	-0.0463487	-0.0454261	0.108422	0.201342	0.0471443	0.0374823	0.0521487	0.0355358	0.426908	-0.00251806	0.0281344	0.291405	0.0287943	-0.0142286	-0.0486001
LINC00269	0.00896449	0.100099	0.0863691	-0.135296	0.0576528	-0.0992958	-0.703906	-0.0813509	-0.0355246	0.164787	-0.0811599	0.0171227	0.277412	0.318298	0.142594	0.258486	0.216409	0.250733	0.839466	0.103057	0.111245	0.0916687	-0.00811992	0.0850317	-0.10513
VSTM4	0.0178221	0.126738	0.0362309	-0.209489	-0.133022	-0.181184	-0.594032	-0.101832	-0.0156862	0.0875991	-0.00224437	0.0455727	0.401597	0.28197	0.260287	0.365803	0.301009	0.35466	0.853002	0.068624	0.170903	0.202374	0.0314978	0.0821545	-0.0925099
CCDC150	-0.0190923	0.114973	0.0766307	-0.0469199	0.0310793	-0.0169565	-0.741764	-0.0218986	0.011031	0.0833563	0.00879013	0.00482795	0.245509	0.25649	0.203989	0.252709	0.243062	0.286938	0.843063	0.0755485	0.132111	0.122263	0.0334766	0.0774428	-0.0309895
C2orf61	-0.0203593	0.133594	0.103185	0.00336003	0.0114752	-0.0624795	-0.762688	-0.00903225	0.0404104	0.0982803	-0.00278974	0.0165081	0.28895	0.319687	0.231237	0.29732	0.280842	0.327978	0.938223	0.0846029	0.15246	0.139495	0.0599956	0.0988406	-0.012075
FAM9B	-0.0474745	0.189954	0.0966485	-0.0713645	-0.017077	-0.116437	-0.696527	-0.0271692	-0.00736872	0.083481	0.000704538	0.0312941	0.347951	0.299688	0.234132	0.38589	0.341984	0.436197	0.950696	0.126277	0.172783	0.19627	0.0224227	0.134837	0.0115794
FLJ40288	-0.119665	0.138309	0.0727458	0.0727935	-0.0320613	-0.320188	-0.561778	-0.0615358	-0.14547	0.112917	0.065161	0.0124499	0.355389	0.340135	0.274203	0.301688	0.33542	0.550194	0.783251	0.0598215	0.18182	0.153771	0.100066	0.132724	0.0388358
CES5A	-0.113565	0.171468	0.0257162	-0.14525	0.0988138	0.0376794	-0.700259	-0.018486	-0.0427296	0.148997	0.0468054	0.0301601	0.287592	0.177922	0.168176	0.334577	0.33252	0.412156	0.898487	0.109357	0.165179	0.203547	0.0204067	0.125544	0.0634424
CHDC2	-0.220085	0.00419669	-0.0240762	-0.0376925	0.0557892	0.596917	0.00825535	0.0564694	-0.0551497	-0.076481	-0.045641	-0.105828	-0.0284165	-0.0683172	-0.0396518	0.0122673	0.00337339	0.0889185	0.0400323	-0.0183668	0.00273173	-0.0206309	0.713641	0.0371866	0.185758
HYDIN2	0.00668601	0.133388	0.0716159	-0.0879556	-0.0517896	-0.0288177	-0.830876	-0.0500499	-0.0199506	0.023247	-0.0654141	0.0127957	0.320027	0.328159	0.205736	0.310067	0.274244	0.357063	0.982184	0.10217	0.165999	0.157119	0.0755018	0.0947602	-0.0670246
DNAH17	-0.069539	0.243193	0.0503285	0.0329786	-0.0210113	-0.0172826	-0.511482	-0.0216258	0.0363822	0.049106	0.202159	-0.00602871	0.127393	0.196067	0.151425	0.13953	0.514381	0.223606	0.621412	0.0277425	0.0789	0.034137	0.0382505	0.0126558	0.0905766
SLC35G3	0.0159784	0.0876874	0.0471053	0.0215523	-0.0287064	-0.0559751	-0.890242	-0.0031986	0.00983123	0.0443294	-0.0709276	-0.00749077	0.252092	0.327759	0.147922	0.192822	0.202419	0.234539	0.951641	0.0729215	0.140952	0.0875941	0.086734	0.0616733	-0.0891239
FLJ32955	-0.0139564	0.0272621	-0.029445	-0.109568	0.00339322	-0.0504387	-0.765191	-0.0689727	-0.0239332	0.0468782	-0.0636392	0.127652	0.17739	0.254072	0.148662	0.149683	0.140664	0.148983	0.75407	0.0492599	0.0840957	0.0382462	0.016903	0.0989959	-0.11175
LOC100288966	-0.0537802	0.112728	0.0164948	-0.0317939	0.0245151	0.198055	-0.842788	-0.0287312	-0.013748	0.0854691	-0.0414223	-0.0323078	0.211869	0.242945	0.0964545	0.122528	0.146012	0.140742	0.82786	0.0229937	0.0940023	0.0250834	0.0709329	0.0202434	-0.0483925
KIRREL3-AS3	-0.179202	0.0260787	-0.00105043	-0.0478468	0.307466	-0.0585609	-0.402791	-0.0278988	-0.000643379	-0.031901	0.0791844	0.0765218	0.081289	0.0779251	0.061017	0.108108	0.0936851	0.149076	0.489034	0.0691512	0.808992	0.110187	0.0401559	0.0566972	0.190222
TMEM145	-0.17296	0.822436	0.0803106	0.000598446	-0.00790167	-0.0770591	-0.193331	-0.0291906	0.0543557	0.0188068	-0.0226105	-0.0274575	0.0952493	0.056611	0.082509	0.152722	0.129106	0.21787	0.417343	-0.00460044	0.446956	0.131726	-0.0122768	0.0613345	0.242819
C15orf32	0.0279477	0.117507	0.108637	-0.12458	-0.052171	-0.143017	-0.875097	-0.00834785	0.0404014	0.123601	-0.108528	0.0124016	0.273187	0.326452	0.180419	0.251016	0.239429	0.282677	0.9674	0.0870052	0.150575	0.103309	-0.0184807	0.062546	-0.101425
TSGA10IP	0.0137328	0.167815	0.00908799	-0.0644896	-0.133699	-0.159311	-0.217592	-0.039544	0.0261668	-0.0205126	0.0184048	0.0664506	0.107985	0.0531905	0.949978	0.168574	0.160615	0.158578	0.352802	0.0321329	0.0416853	0.0585485	-0.0429688	0.0161555	0.0202938
LINC00477	0.0192375	0.110895	0.0893212	-0.0421431	-0.0333407	-0.0588788	-0.825335	-0.026814	0.0120733	0.0580704	-0.0432418	0.0565328	0.277589	0.292365	0.177689	0.243665	0.241906	0.271671	0.943435	0.080486	0.144915	0.116011	0.0475546	0.0677697	-0.0664014
CCDC140	-0.0381058	0.081537	0.0420332	-0.00241782	0.10125	0.00346177	-0.702268	-0.0242017	0.00561628	0.0995173	-0.017027	-0.0104974	0.217242	0.289962	0.147634	0.230301	0.208705	0.322976	0.830432	0.121103	0.137093	0.0821193	0.0728163	0.0671019	-0.0157026
C17orf78	0.110358	-0.042256	-0.0505029	-0.0739031	-0.0540607	-0.0580479	0.00437472	-0.070996	-0.0434706	-0.0300865	-0.0789947	-0.0849262	0.018895	0.0296973	0.0140966	0.00397834	0.211298	-0.00626696	0.10271	-0.0107157	-0.020266	-0.00398478	-0.0409447	-0.0484367	-0.205641
TEKT5	0.0619886	0.085708	0.0316296	-0.0432336	-0.0895585	-0.0551167	-0.581055	-0.0407974	-0.0126125	0.025774	-0.102025	-0.00592303	0.833246	0.296009	0.137283	0.238891	0.181321	0.250495	0.730556	0.0226936	0.0639505	0.0430889	-0.0200421	0.0182171	-0.163471
KSR2	0.0632609	0.109544	0.0133906	-0.0102803	0.00802688	-0.193825	-0.825821	-0.133451	-0.0878687	-0.065586	-0.0500413	0.0219418	0.235282	0.294564	0.200155	0.227009	0.241664	0.264235	0.895885	0.0883622	0.150334	0.0962023	0.0822695	0.0727861	-0.12346
PAX1	-0.0326763	0.0404861	0.0103064	-0.103094	0.0423198	-0.0223593	-0.251621	-0.078063	0.0334325	0.0512247	-0.117782	-0.0534342	0.113228	0.290652	0.0861194	0.103438	0.0932362	0.126957	0.393712	0.0534016	0.0607822	0.823047	0.0564557	0.0446317	0.0748343
TDH	-0.00524408	0.00728583	-0.00174337	-0.0187086	0.0456451	0.0349133	-0.889526	0.0275804	0.0221394	0.0688028	-0.0137847	0.0426722	0.14698	0.293374	0.0947467	0.101932	0.12922	0.147602	0.834058	0.020761	0.130773	0.00965758	0.0486328	0.00878722	-0.0800155
LINC00615	-0.0210207	0.157299	0.0644017	-0.0380717	-0.0129663	-0.061312	-0.793839	-0.0486836	0.000289325	0.0382399	-0.0220573	0.0224682	0.31834	0.277353	0.189221	0.318017	0.288262	0.356872	0.978389	0.116821	0.195516	0.159571	0.0335227	0.117666	-0.0275235
SERPINA9	-0.093814	0.0430638	0.00736749	-0.0501809	-0.0292971	-0.0715775	-0.314766	-0.0188979	-0.00671236	0.0581135	0.0172792	-0.0310483	0.320944	0.104073	0.108615	0.116153	0.0994561	0.120513	0.416202	0.00318307	0.417186	0.116774	0.00681973	0.0262862	0.060056
FBXL21	-0.0408108	0.0214384	0.0413464	-0.0917649	0.0426218	0.00811367	-0.736644	-0.0332156	-0.0282883	0.0886783	-0.138303	-0.047283	0.207762	0.290207	0.0457859	0.118084	0.116272	0.131903	0.726236	0.0222645	0.0121036	0.0183247	0.0320716	0.115066	-0.136421
MRGPRX4	0.00528475	0.091114	0.0189458	-0.230156	-0.0448862	-0.1069	-0.831983	0.10909	-0.000167364	0.00615361	-0.114676	0.0036705	0.273289	0.306109	0.200177	0.260492	0.214226	0.293087	0.919782	0.0774587	0.133153	0.112737	0.184338	0.0874851	-0.0589312
A2ML1	0.0103563	-0.0913159	-0.0701301	-0.020994	-0.0515439	-0.0609099	-0.393807	-0.0915757	-0.0891431	-0.0287972	-0.104325	-0.027096	0.100658	0.500056	-0.0435223	-0.040397	-0.0348603	-0.0491423	0.239676	-0.0699652	-0.0744965	-0.0719889	-0.048666	-0.104861	-0.211204
CPO	-0.068116	0.174517	0.07595	-0.0372243	-0.0156271	-0.0395792	-0.723638	-0.0515307	0.0231769	0.0625924	-0.0111778	0.0197578	0.312701	0.22185	0.242296	0.342886	0.306571	0.388639	0.947347	0.12677	0.171046	0.179455	0.0512369	0.131457	0.0245742
GPR6	-0.0545666	0.0830633	0.018886	-0.0652312	0.125471	-0.160553	-0.649877	-0.029004	-0.0628047	-0.00857952	-0.0295994	0.0337403	0.419474	0.353866	0.215584	0.386643	0.288883	0.446973	0.859864	0.0666691	0.153754	0.12664	-0.0572646	0.0792627	-0.0522152
MDS2	-0.047126	0.0104513	-0.0156544	-0.0143558	-0.00452263	-0.0458966	-0.551926	-0.0431824	-0.0521357	-0.0130155	-0.0179763	0.0528449	0.101768	0.115588	0.0329782	0.0548504	0.0721984	0.160381	0.457796	-0.00318759	0.126244	0.0257591	0.0184375	-0.00626447	-0.0163419
RQCD1	-0.146235	0.216526	-0.042553	0.276431	-0.282203	-0.100169	0.397369	0.0133565	-0.0302351	-0.151658	0.0807509	-0.148124	-0.388568	-0.21874	0.00630688	0.233528	-0.163719	-0.195556	-0.322014	0.078563	0.410458	0.289291	0.200899	0.0785099	0.313288
GJD3	0.0182366	0.0457519	0.035143	-0.115808	0.0661576	-0.00183221	-0.686545	-0.0398685	-0.105693	0.123931	-0.00260649	0.00126171	0.22119	0.265716	0.185915	0.173024	0.186702	0.358863	0.740745	0.0469721	0.103907	0.0616575	0.0535986	0.0414164	-0.0943049
HOXC12	-0.141528	0.0759476	0.352444	-0.00450651	-0.07676	-0.136963	-0.0726057	-0.0497581	-0.0250308	-0.0222357	0.0041406	-0.0398136	0.0399682	0.151724	0.0475284	0.802391	0.06844	0.0650164	0.250422	0.0139822	0.315853	0.0196701	0.0120086	0.0171569	0.158539
VNN3	0.151356	0.0855416	0.0867275	-0.211707	0.0121626	-0.108881	-0.663455	-0.0136546	-0.0453362	-0.126172	-0.19075	-0.0337139	0.344662	0.350469	0.0248204	0.214763	0.202769	0.191645	0.774038	0.0976311	0.110633	0.0739315	0.110679	0.0639155	-0.183544
MYEOV2	-0.0286341	-0.0169423	-0.0168054	-0.0409074	-0.0330748	-0.0472003	-0.439456	-0.0749973	-0.0508302	-0.0181856	-0.0229973	0.0358567	0.0465429	0.0858286	0.00513834	0.00805766	0.0181547	0.0273879	0.302915	-0.0396688	0.0145317	-0.0303882	-0.0406874	-0.0475786	-0.064211
FERD3L	-0.0623071	0.159549	0.0947817	-0.04333	-0.0426689	-0.0967477	-0.678773	-0.0238843	-0.0236652	0.090514	-0.00189734	0.0201796	0.300692	0.261438	0.228421	0.332223	0.301449	0.349318	0.908102	0.10791	0.388872	0.205019	0.067557	0.127967	0.0494276
LINC00314	0.0400233	0.054993	0.0675733	-0.085302	-0.0513144	-0.0371348	-0.932148	-0.0793219	-0.00718695	0.0406578	-0.100176	0.0616731	0.210683	0.306238	0.121972	0.174036	0.201646	0.15881	0.931243	0.0418398	0.103941	0.0204841	0.0403052	0.0232032	-0.148255
NLRP14	-0.0707898	0.141984	0.0632496	-0.115262	0.042296	-0.0344545	-0.751445	-0.0134227	0.0730338	0.0968701	-0.00441174	0.0137787	0.305332	0.295984	0.186393	0.325767	0.281051	0.353887	0.919371	0.106853	0.139046	0.140767	0.0632425	0.111173	0.00426136
DGKB	0.00536052	0.12933	0.0616737	-0.131401	-0.00659646	-0.137639	-0.834954	-0.0157977	-0.0185246	0.082265	-0.0210734	0.0304009	0.259274	0.246163	0.204757	0.277697	0.250019	0.307266	0.966552	0.127368	0.172426	0.125664	0.0704052	0.128668	-0.0565969
NLRP13	-0.0847514	0.0506716	0.00321563	-0.0908123	-0.027339	-0.04407	-0.54984	0.143044	-0.0889585	0.0289655	-0.0511801	-0.0168228	0.203322	0.546406	0.0667865	0.175605	0.179077	0.182923	0.60107	0.0106961	0.0438536	0.0485921	0.0125453	-0.00415972	-0.0411825
NLRP8	-0.0937536	0.114669	0.0792556	0.0515407	-0.0440633	-0.211587	-0.661592	-0.00299225	0.00363631	0.142547	0.182622	0.293141	0.258749	0.314182	0.191007	0.276256	0.24482	0.284781	0.844707	0.0748787	0.13204	0.113876	0.0826903	0.0810101	0.046397
NLRP9	-0.0726505	0.181699	0.096074	0.00512042	-0.0284428	0.0108711	-0.527155	-0.0362647	0.0336472	0.0152753	0.000169335	-0.000164614	0.384246	0.226753	0.205009	0.32981	0.302216	0.409998	0.826623	0.1033	0.136553	0.162559	0.00656581	0.120507	0.0225814
TAF5	0.0629634	-0.138481	-0.575584	-0.0547798	-0.017231	0.0482253	0.579908	0.163841	0.0859841	-0.0315001	0.170568	0.0437097	-0.221525	-0.352443	0.00187818	-0.0847178	-0.32001	-0.0610216	-0.493645	0.0601657	0.196771	0.216927	-0.0376464	-0.0765913	0.0702986
TAS1R2	-0.0922843	0.196506	0.0907136	-0.0689383	0.0546032	-0.000857522	-0.632908	-0.00810209	0.0208516	-0.0135626	0.0188573	0.00725933	0.333333	0.291322	0.244598	0.396419	0.337763	0.576663	0.908973	0.0907202	0.156668	0.194371	0.0632075	0.132173	0.0705086
ITGB1	0.623974	-0.237822	0.0201667	0.0973823	-0.260658	-0.132374	-0.0142151	-0.321303	-0.271978	-0.015894	-0.26046	-0.0527276	-0.165514	-0.0199099	-0.240242	-0.192167	-0.299615	-0.420143	-0.316681	-0.25588	-0.300055	-0.550008	-0.0190353	-0.309167	-0.639897
PCSK6	-0.0913506	0.960328	0.0613902	0.00618663	-0.0443081	-0.0328498	-0.152669	-0.0480606	-0.00255329	-0.0424363	0.0380422	-0.0357063	0.0450975	0.0372597	0.0559271	0.0634246	0.0958945	0.136001	0.281033	0.010854	0.048693	0.0573001	-0.0192496	0.0269476	0.170007
ZNF341	-0.0414648	0.107584	0.0806433	-0.0850712	-0.0315277	-0.182176	-0.585304	-0.0171036	0.0455087	0.00618784	0.0504995	0.00688108	0.260115	0.323193	0.230474	0.73687	0.248417	0.320969	0.80049	0.083001	0.126985	0.119351	0.0100743	0.187274	0.0517822
JPH1	0.126896	-0.0023297	-0.0878621	-0.176903	-0.0640471	-0.169394	-0.209221	-0.138533	-0.0731455	-0.00364604	-0.0422885	-0.029668	0.0509439	0.240225	0.751596	0.335643	0.0610913	0.0883974	0.304969	0.000421862	-0.0123532	0.277442	-0.0473942	-0.0296115	-0.0784337
NLRP10	-0.0287427	0.127565	0.0490206	-0.0857585	0.0440886	-0.0380832	-0.804364	-0.0195461	0.0205581	0.0965932	-0.0168554	0.0126654	0.327958	0.31045	0.257943	0.269157	0.267916	0.343674	0.966586	0.0997191	0.121417	0.130247	0.0556797	0.090528	-0.0433616
RANGAP1	0.0619332	-0.0783919	-0.0537273	-0.0220612	-0.118064	-0.00867403	-0.60105	-0.0821373	-0.11979	0.004602	-0.150958	-0.0882859	0.062089	0.170124	-0.0271227	-0.0519999	-0.034662	-0.118496	0.366199	-0.0772036	-0.0908237	-0.167337	-0.0485057	-0.0656834	-0.210276
MBNL2	0.17281	0.0382867	0.758551	0.0116972	-0.0377208	-0.041505	-0.246052	-0.0949353	-0.0771261	-0.0380729	-0.131312	-0.0757016	0.0455959	-0.00222842	0.0499322	0.0605224	0.0774166	0.0939629	0.314274	-0.0317422	-0.0345443	-0.028614	-0.02674	-0.0211878	-0.108861
KRT73	-0.03546	0.128861	0.0552544	-0.0740421	-0.0571808	-0.0487667	-0.779063	-0.0686012	-0.0250235	0.0371254	-0.0609719	0.00181536	0.292545	0.271463	0.237566	0.355211	0.322629	0.319226	0.928581	0.115885	0.132558	0.126318	0.023003	0.0956141	-0.0439087
COX1	0.563358	-0.00674532	0.195613	0.0283987	-0.42639	-0.0102772	0.0336007	-0.159878	-0.07142	0.0442318	-0.111758	-0.0634093	0.00991126	-0.0414885	-0.0818882	-0.0618666	-0.0337748	-0.063509	-0.140041	-0.492465	-0.184665	-0.511621	-0.181772	-0.221161	-0.46339
KRT74	-0.0628225	0.0999933	0.785908	0.0392581	-0.0404266	-0.025628	-0.480191	-0.032732	-0.000210274	0.00940443	-0.0753496	-0.01993	0.16661	0.140303	0.121922	0.170039	0.173572	0.181386	0.602251	0.0227232	0.0526523	0.0476702	0.00952649	0.0284085	0.0288408
SLC29A2	0.000503888	0.114601	-0.175735	-0.0250811	-0.0271161	-0.0408725	-0.679994	0.00823265	0.00766747	0.0867655	0.0325598	0.043324	0.323627	0.354697	0.230206	0.290341	0.207375	0.331067	0.809232	0.075211	0.145856	0.101857	0.0333577	0.110693	-0.0241579
LMX1A	-0.0493257	0.173508	0.086409	-0.039242	-0.0516174	-0.10663	-0.70789	-0.0256137	0.00870988	0.0818894	-0.00270561	0.0186354	0.335814	0.286171	0.2449	0.392	0.327741	0.413748	0.943803	0.117081	0.161187	0.182879	0.0420242	0.129468	0.00863158
CCDC125	0.377625	-0.0319142	-0.181282	-0.189593	-0.105094	-0.280588	-0.449585	-0.124316	-0.280723	-0.00998544	-0.163302	-0.238868	0.0317118	0.0644148	-0.115715	-0.000575492	-0.293603	-0.191818	0.264146	-0.211294	-0.0475102	-0.297249	0.0616727	-0.0256367	-0.492374
GPR101	-0.0689106	0.128199	0.0939678	-0.0686635	-0.0347284	-0.0807719	-0.727744	-0.0205709	0.0197735	0.116027	0.0139343	0.041485	0.328564	0.283737	0.255616	0.302304	0.279246	0.317348	0.903187	0.0649305	0.162498	0.164932	-0.00199961	0.0807841	-0.00345306
ILDR1	0.0180852	0.142038	0.105897	-0.0052217	-0.144913	-0.188118	-0.745422	-0.0370128	0.0354191	0.141069	-0.0621806	0.0288423	0.271657	0.299232	0.421506	0.308538	0.284095	0.365573	0.931585	0.0829052	0.155314	0.121384	0.0778107	0.0745883	-0.0487774
VN1R2	-0.0418489	0.0980128	0.0113102	-0.04605	0.0293986	-0.0874238	-0.263405	-0.0283798	-0.0220446	-0.00836742	-0.0427323	-0.057407	0.159911	0.120779	0.10753	0.199526	0.180811	0.506897	0.507007	0.0720018	0.126264	0.794863	0.00747625	0.0883542	0.130579
VN1R5	-0.0373769	0.162692	0.0830976	-0.0427814	-0.00905749	-0.0699851	-0.567858	-0.0339849	0.0146469	0.0641032	-0.0339018	0.0204308	0.277268	0.243819	0.214811	0.307966	0.315531	0.371923	0.835265	0.106442	0.140729	0.173875	0.0274588	0.108253	0.0030979
ND2	0.274257	-0.00981849	0.0575692	-0.16737	-0.256992	-0.159374	-0.467663	-0.0883195	0.0287518	0.22196	-0.319905	0.0313836	0.133114	0.153329	0.224593	0.102399	0.0635915	0.0838689	0.305123	-0.116186	-0.0680993	-0.175156	-0.19359	-0.051393	-0.240113
TAAR8	-0.0606173	0.0243865	0.0309454	0.554217	-0.0442049	-0.100071	-0.606389	-0.057048	0.0117804	0.0334924	-0.109982	-0.0237874	0.193071	0.571778	0.0751805	0.105919	0.096979	0.130176	0.604748	-0.00785777	0.0263032	0.00141986	0.0356079	-0.00907765	-0.0604498
TAS2R39	-0.0378311	0.155384	0.0755612	-0.0435147	0.0132171	-0.037659	-0.73147	-0.0447279	-0.0180468	0.0843554	-0.0347044	0.0184363	0.362945	0.299362	0.244922	0.3452	0.312982	0.44487	0.957002	0.094995	0.170115	0.169972	0.0237516	0.111218	-0.0150462
TAS2R38	-0.146718	0.0525063	0.00187918	-0.0130985	-0.0628591	-0.0810811	-0.0965555	-0.0213671	-0.0240586	-0.0276399	-0.0271062	-0.0537423	0.0797771	0.084669	0.0658095	0.123691	0.0765302	0.145871	0.282255	0.672127	0.105683	0.75864	-0.00105796	0.113175	0.181162
TAS2R40	0.0083417	0.160086	0.076988	-0.142185	-0.142193	-0.187526	-0.735762	-0.0656651	-0.0105017	0.173863	0.0163797	0.0603869	0.344135	0.245261	0.22813	0.362696	0.29268	0.375114	0.910929	0.0992099	0.178577	0.144114	-0.0281808	0.0966951	-0.0478492
TAS2R41	-0.0417431	0.1532	0.0867946	-0.0330544	0.0114875	-0.074874	-0.744056	-0.0135261	0.0180727	0.115454	-0.0027752	0.00951789	0.31087	0.313421	0.24521	0.326419	0.311131	0.369971	0.949278	0.0903048	0.150661	0.153386	0.0684904	0.109145	0.00051211
TMEM171	0.564824	-0.116241	-0.122406	-0.156765	-0.0968257	-0.105756	-0.304215	-0.145056	-0.125912	-0.0530496	-0.139925	-0.0931195	-0.0027509	-0.0277232	-0.0361906	-0.0566243	-0.0690152	-0.0877524	0.182321	-0.0795871	-0.0671508	-0.113643	-0.100581	-0.123171	-0.48265
VN1R4	-0.107132	0.180126	0.0792665	0.0555011	0.0587114	0.0136165	-0.737764	-0.0283312	0.0493194	0.157193	-0.0674907	-0.00122505	0.341058	0.370195	0.178149	0.280563	0.304092	0.383048	0.93725	0.0966235	0.150034	0.176699	0.0904833	0.101783	0.0349194
TAS2R50	-0.00674502	0.165906	0.0718057	0.00624208	0.0296368	-0.111229	-0.617625	-0.0410029	-0.0254335	0.0611263	0.0113003	0.0278262	0.302773	0.254258	0.224219	0.330519	0.29565	0.396363	0.878813	0.104178	0.142283	0.153542	0.000171269	0.115413	-0.0194168
MACROD2	0.512143	-0.170745	-0.161302	-0.224896	-0.162434	0.279403	0.247817	0.234718	-0.189208	-0.223345	-0.182088	-0.156233	-0.145393	-0.247048	-0.199756	-0.166885	-0.0623829	-0.200925	-0.331941	0.043552	-0.056002	-0.150686	-0.213325	-0.170145	-0.321422
DDAH1	-0.00639574	0.00398071	-0.0251454	-0.012288	-0.0623026	-0.0376436	-0.482772	-0.0563744	-0.0410314	-0.0182698	-0.0788412	-0.0704845	0.0408102	0.0803831	0.0169145	0.0614748	0.0149287	-0.00542873	0.354601	-0.0465333	-0.00933857	-0.067315	-0.0281373	0.0177654	-0.0851823
PIANP	-0.00355546	0.0257933	-0.019815	-0.0384987	-0.101074	-0.0968203	0.0491122	-0.0458964	0.0468725	-0.0528891	-0.00136398	0.00847083	-0.0360499	-0.049491	0.842141	0.0410121	0.499795	0.0609546	0.014872	-0.0176037	-0.0439341	-0.0189865	-0.0386928	-0.0437272	0.0770954
ATP6	0.338061	-0.0474192	0.055789	-0.0140415	-0.448475	-0.0811972	-0.417008	-0.0707898	-0.0345048	0.0280668	-0.131958	0.037325	0.14195	0.156036	0.0793139	0.0294054	0.0425062	-0.00198369	0.19406	-0.153042	-0.129392	-0.407379	-0.178283	-0.113971	-0.316697
HIST1H1T	-0.0463054	0.142561	0.106448	-0.111154	-0.134391	-0.178787	-0.714829	0.0229167	0.0690045	0.127524	0.0381727	0.0570194	0.342442	0.337293	0.30434	0.382109	0.345891	0.399795	0.940527	0.106752	0.125674	0.186939	0.0218284	0.111742	0.0051533
COX2	0.57445	-0.145916	0.0110685	-0.136479	-0.376933	-0.0540595	-0.393188	-0.126878	-0.00726335	0.0851911	-0.290085	-0.0586662	0.147721	0.106795	0.087663	-0.0894228	0.0510039	-0.04161	0.17541	-0.305912	-0.253802	-0.587433	-0.342949	-0.269559	-0.617446
CYGB	-0.0157449	0.045313	0.0172751	-0.0154602	-0.0307901	-0.0654968	-0.588528	-0.079119	-0.0486	0.0736378	-0.0503444	-0.0191176	0.169206	0.221113	0.123624	0.150648	0.144834	0.162235	0.632332	0.294279	0.0708974	0.0708959	-0.0188825	0.0352785	-0.0984562
EFNA2	-0.110559	0.346664	0.0961416	-0.168971	0.288644	-0.129654	-0.669978	-0.059098	0.121862	0.0850969	-0.0589885	-0.0115398	0.305426	0.267613	0.219486	0.322087	0.282124	0.370486	0.875723	0.0774324	0.144266	0.178104	0.0468755	0.104102	0.0722162
IFNE	-0.17158	-0.00815221	0.759116	0.696747	-0.0575268	0.0232729	0.0583414	-0.0445085	-0.0591801	-0.106356	-0.0626712	-0.0549862	-0.0793646	-0.114754	-0.0775381	-0.085817	-0.0478018	-0.0586862	-0.0824852	-0.0863091	-0.0691996	-0.0643177	-0.0324204	-0.0491982	0.141687
ND6	0.160151	-0.0870857	-0.0350987	-0.0304056	0.448414	0.0767463	-0.235987	-0.211414	-0.130586	0.199785	-0.266555	-0.122376	-0.0417373	0.120741	-0.198188	-0.142613	-0.234423	-0.200899	0.108059	-0.369893	0.0652021	0.154492	-0.0469893	-0.304819	-0.249457
SREK1IP1	-0.657997	0.370885	0.0832318	0.20706	0.168716	0.109283	0.0983578	0.399971	0.147551	-0.022745	0.361335	0.0389216	-0.0111874	-0.0982447	0.277183	0.26042	0.341505	0.523216	0.163759	-0.0316648	0.168041	0.107691	0.186336	0.247473	0.709958
THRSP	0.0187846	0.0269043	-0.168873	-0.0450478	-0.0573398	-0.160019	-0.531739	-0.0681232	-0.0309465	0.0718331	-0.063934	-0.194865	0.197178	0.275114	0.321844	0.482409	0.347218	0.281218	0.669266	0.165349	-0.103101	0.0361158	0.127252	0.39119	-0.0263436
CXorf36	-0.0893531	0.157761	0.104098	0.0472921	0.0451312	-0.0608256	-0.734739	0.00919256	0.0121798	0.033885	-0.0161402	0.0230305	0.275024	0.269397	0.223042	0.302416	0.287674	0.355723	0.902387	0.0960694	0.151375	0.131674	0.0180122	0.103129	0.0378411
FBXL19-AS1	0.0481323	0.06575	-0.0726669	-0.0961272	-0.0729353	0.00771979	-0.747445	-0.0566984	-0.0942953	0.113042	0.00432622	-5.78126e-05	0.231567	0.326973	0.179229	0.202582	0.178719	0.214091	0.784756	0.0639724	0.108554	0.0591771	0.111084	0.0711622	-0.105333
POLE4	-0.501458	0.0721647	0.187845	0.313761	0.308233	0.24197	-0.111532	0.118418	-0.0223971	0.116695	-0.0474498	-0.0109106	-0.0337627	-0.205	0.0915631	-0.0123622	-0.302329	-0.0566743	0.0567973	0.0339336	-0.0398844	0.335832	0.114468	0.318729	0.449862
PDZK1IP1	0.224209	0.110788	0.263505	-0.0343041	-0.133229	-0.109924	-0.0161431	-0.312912	0.0559205	-0.0329418	-0.230227	-0.0971788	-0.0746413	0.100653	0.0843764	0.0785985	-0.0228033	-0.0655635	-0.103551	-0.020326	-0.0831094	-0.268904	-0.422703	-0.10312	-0.195007
BCRP3	0.0294515	0.0643598	0.0566779	0.0805703	-0.045078	-0.0859657	-0.691516	-0.00520919	0.0494805	0.00157141	0.00924035	0.00513447	0.204405	0.310274	0.16829	0.163493	0.167441	0.164247	0.760893	0.0508752	0.106614	0.0651368	0.0110352	0.0458	-0.0681134
TAL2	-0.102068	-0.0223163	0.00985287	-0.0163933	-0.00762236	-0.0228717	-0.194937	0.0160425	-0.0150601	0.0127038	0.0633981	0.903999	0.00233265	0.0317319	0.0103955	0.0228929	0.0297484	0.0197033	0.232003	-0.0272842	0.152325	0.0392319	-0.0191356	-0.0250619	0.091997
INSL3	0.00161484	-0.0610345	-0.046087	-0.0350037	-0.00160556	-0.0561264	-0.593433	-0.0788323	-0.0511675	0.0100824	-0.0794767	-0.0184201	0.060336	0.226724	-0.0188041	-0.0133878	-0.00816742	-0.0172219	0.367732	-0.0729849	0.00220372	-0.0569785	-0.0392737	-0.0868333	-0.130813
SYCP3	-0.13884	0.0459386	0.0440214	-0.0138684	0.0971778	0.0375452	-0.834476	-0.0513083	-0.00241568	0.112524	0.0111776	-0.0291096	0.141043	0.228499	0.161202	0.105966	0.152892	0.467576	0.863292	0.0280422	0.301892	0.222517	0.0865275	0.0588494	0.0770774
TMIE	-0.0638488	0.0883864	0.241695	-0.0191836	-0.0181226	-0.032121	-0.712414	-0.0477778	0.00186494	0.0834517	-0.0135581	-0.000443039	0.144502	0.255537	0.205966	0.402785	0.412459	0.424396	0.76555	0.0479213	0.0776047	0.0163488	0.0352616	0.0339622	0.0682923
MUCL1	-0.20468	-0.0808328	-0.0518579	0.0991185	0.00346485	0.588232	0.231587	0.0706092	0.420548	-0.150174	-0.128157	-0.10462	-0.117698	-0.124473	-0.149612	-0.119566	-0.123045	-0.124454	-0.277141	0.498681	-0.103692	-0.0642242	-0.118066	-0.0500165	0.154171
ATL2	0.496553	-0.0819533	-0.17807	-0.0293934	-0.432302	-0.429634	-0.0257414	-0.178253	-0.142734	-0.108411	-0.126324	-0.0584253	-0.144004	-0.03242	-0.0557718	-0.0211762	-0.0621083	-0.0798162	-0.0597819	-0.211123	0.0885594	-0.0873836	-0.0549519	0.0825702	-0.370311
LINC00189	-0.0725506	0.0742045	0.703552	0.041822	0.00296313	-0.00263751	-0.457306	-0.0583276	-0.0123741	0.0161628	-0.0843704	-0.0408412	0.0948474	0.10129	0.0942261	0.0960243	0.133757	0.46699	0.534125	0.01706	0.030948	0.0157153	0.0216526	0.0407295	0.0434644
KLHL35	-0.24569	-0.0147188	0.680101	0.333342	-0.0658205	0.108295	0.209378	-0.0140854	-0.0355144	0.106814	-0.062732	0.000289209	-0.128684	-0.146182	-0.0945988	-0.0818638	-0.0745813	-0.0535058	-0.162899	-0.0545496	-0.0956006	-0.0681395	0.0810297	0.604466	0.255851
ZNF354B	-0.0502047	-0.0999703	0.0876749	-0.0621177	0.150872	-0.087599	0.43234	-0.0439688	0.23515	0.0546612	0.264275	-0.0164174	-0.134864	-0.352441	0.0280413	0.169176	-0.171162	-0.0405009	-0.313949	0.139918	0.324371	-0.0640285	0.027988	0.0384948	0.236033
FOXC1	-0.447556	0.164563	0.245122	0.287275	0.24818	-0.0912684	0.540072	-0.011956	0.0871719	0.129118	0.370699	0.319806	-0.105903	-0.201513	0.0962566	0.116516	0.315235	0.09802	-0.301559	-0.0638768	0.0255775	0.341288	0.0864966	0.154085	0.577971
TRIM42	-0.000808294	0.126444	0.086833	-0.0249683	-0.0327418	-0.0580006	-0.76319	-0.0156769	0.0729845	0.0673219	-0.0303688	0.0116254	0.283892	0.291461	0.195763	0.274029	0.263417	0.307984	0.933577	0.0941814	0.153907	0.127796	0.050922	0.0871621	-0.0352065
FSIP1	-0.00967256	0.148126	0.0626286	-0.032999	-0.0206582	-0.105061	-0.795815	-0.0777679	0.000187578	-0.0244103	-0.0361867	0.0399464	0.321554	0.335453	0.178189	0.313864	0.287957	0.367205	0.96827	0.118306	0.169598	0.182156	-0.000578717	0.112767	-0.0549711
MGC15705	0.000497057	0.0912503	0.0560611	-0.0468884	0.00366461	0.00913155	-0.712208	-0.0105491	0.031297	0.106188	-0.000383781	0.0199571	0.224909	0.261569	0.149271	0.190287	0.195491	0.238434	0.771435	0.0739374	0.115827	0.0857741	0.0621147	0.0600658	-0.0458898
FAM98B	-0.0202118	0.0270599	0.0177061	-0.0439724	0.0320456	-0.00388551	-0.954671	-0.0515072	-0.00806287	0.0532569	-0.0354465	0.052912	0.183895	0.255397	0.121637	0.113394	0.12183	0.133045	0.882092	0.0190638	0.113129	0.00945779	0.0290727	0.0172761	-0.0969319
EFCAB13	-0.0885683	-0.0181122	0.0115829	-0.000492848	0.338008	0.00477465	-0.483727	-0.0312536	-0.0209619	0.058103	0.00210641	0.186857	0.0820407	0.174165	0.079328	0.0386676	0.0565961	0.102021	0.517841	-0.00716453	0.00523327	-0.00862588	0.0243989	0.133173	-0.0184352
FAM71B	-0.0105187	0.0975268	0.065844	0.0490228	-0.0215057	-0.04133	-0.654826	0.0308754	0.0274785	0.140434	-0.0181956	0.0126414	0.270354	0.325063	0.204861	0.22118	0.220242	0.212962	0.7914	0.0694142	0.118165	0.123485	0.0439136	0.07012	-0.021575
C10orf107	-0.0120747	0.0736103	0.0718103	0.0151654	0.0291317	-0.0504896	-0.850193	-0.0505906	0.00269212	0.0573201	-0.0220149	-0.00215712	0.210075	0.26659	0.169744	0.204762	0.184548	0.200986	0.907185	0.0583898	0.116426	0.0666997	0.0579869	0.0646816	-0.0680126
WEE2-AS1	-0.0612354	0.112366	0.0854639	0.0168732	0.0502631	0.0306836	-0.689886	-0.0275191	-0.00400296	0.0846018	-0.0186252	0.013496	0.280046	0.27349	0.203195	0.247665	0.229035	0.24768	0.819567	0.0815769	0.142476	0.111814	0.0749482	0.0365903	-0.0236063
TCTEX1D1	-0.188169	0.0366471	-0.0137988	-0.0827813	0.599046	-0.0243506	-0.486202	0.0964245	-0.0577509	-0.0169024	0.420762	0.0667766	0.0893996	0.125824	-0.00948069	0.0902703	0.0931861	0.160117	0.505765	0.0412072	0.0964733	0.0826928	0.0141011	0.076914	0.161621
TMCO5A	0.0226179	0.171437	0.0941039	-0.0802499	-0.0705517	-0.118778	-0.754051	-0.0423244	0.00444474	0.0317042	-0.0476809	0.017874	0.335963	0.269841	0.24707	0.352076	0.320496	0.387238	0.970031	0.123791	0.181485	0.177779	0.0235221	0.121842	-0.0423358
PPARGC1B	0.0404931	-0.238789	-0.0557698	-0.072182	-0.0178526	0.0517086	-0.110336	0.0784859	-0.0721848	-0.170728	-0.0896896	-0.115012	0.526193	0.0270932	-0.0269229	-0.0534983	0.00665537	0.266742	0.129188	-0.063435	-0.058659	-0.109094	0.349262	-0.0844977	-0.102882
XKR6	-0.183076	-0.0374848	-0.0541157	-0.0464989	0.951932	0.0433404	0.118445	-0.0124137	-0.0502116	-0.0495783	0.0250351	-0.0341162	-0.0600179	-0.0896004	-0.0982486	-0.0583435	-0.0463801	0.00404316	-0.17331	-0.0213936	-0.0362156	0.0175538	-0.013242	0.030042	0.182561
TSGA13	-0.0287593	0.0523723	0.0540504	0.0574017	0.0347081	-0.0060195	-0.66091	0.0166929	0.0450605	0.113756	0.00471155	0.0228054	0.186502	0.280152	0.16294	0.131752	0.150398	0.147332	0.733913	0.0383079	0.097164	0.10257	0.0980797	0.0487563	-0.00665794
C9orf163	-0.0053036	0.117163	0.0247182	-0.147884	0.0355412	-0.201348	-0.707456	-0.0271718	0.0167684	0.147412	0.024182	0.029104	0.378871	0.37385	0.24593	0.368389	0.343943	0.328578	0.918792	0.0479008	0.144604	0.123904	0.0590554	0.117814	-0.0520586
SYNE3	-0.0744473	0.0132458	-0.00151555	-0.0430984	-0.0728703	-0.0941489	-0.0790901	-0.054986	-0.0588704	-0.0617406	-0.0129978	-0.0315331	0.0412905	0.0349861	-0.00824865	0.0780765	0.0380077	0.0839424	0.147384	0.987715	0.0407357	0.0611542	-0.0288931	0.0621501	0.0347386
CCDC141	-0.176456	0.0250492	-0.0174826	0.0090709	-0.000581609	-0.0268089	-0.282848	-0.018935	-0.0215988	0.0204735	0.75748	0.182685	0.0368695	0.0681995	0.0384285	0.0361695	0.0483551	0.0842513	0.369738	0.0224492	0.151026	0.055905	0.0131458	0.0300154	0.157338
HDX	-0.00460918	0.0417202	0.00463037	-0.0228863	-0.0268461	-0.165358	-0.627769	-0.0471183	-0.0310653	-0.0433049	-0.11985	-0.020088	0.219595	0.193661	0.0308343	0.141746	0.131287	0.154253	0.668444	0.051106	0.0555731	0.0414512	-0.032659	0.016841	-0.156941
CDYL2	-0.105409	-0.0304022	0.0170491	0.033273	0.0571483	0.00683216	-0.442133	-0.0302871	-0.0135986	0.0698741	0.0436398	0.517935	0.0694609	0.393162	0.0438062	0.0338624	-0.0089259	0.025889	0.419327	-0.0127787	0.0176082	-0.031186	0.295883	-0.0112836	0.0229351
C18orf54	0.0217949	0.0321469	0.0388363	0.0285118	0.00307168	-0.0135782	-0.849064	-0.0235034	-0.00870787	0.0472272	-0.0262637	0.00592719	0.156493	0.260818	0.106659	0.114949	0.134988	0.107875	0.807726	0.0270863	0.104099	0.0208582	0.0899578	0.0165283	-0.0961105
SYT14	0.00750711	0.143752	0.0749935	-0.0486544	-0.0603599	-0.0703027	-0.840772	-0.0574084	-0.0465747	0.0678324	-0.106441	-0.00332929	0.31168	0.268715	0.212759	0.303481	0.280152	0.329594	0.979739	0.0995777	0.159075	0.15405	0.0426162	0.0942026	-0.0706966
CDC20B	-0.0309841	0.14832	0.0610428	-0.107176	-0.0258257	-0.0864615	-0.775409	-0.0465026	-0.0645199	0.00475827	0.0123171	-0.00187645	0.317058	0.309057	0.185114	0.339397	0.300218	0.380773	0.959942	0.111057	0.169697	0.162241	0.249628	0.112427	-0.0224
TECTB	0.0553637	-0.0518595	-0.0613505	-0.0742646	-0.0722394	-0.0847362	-0.0884856	-0.077999	-0.0970492	-0.0354072	-0.0808812	0.0263837	0.0921524	0.943819	-0.0255287	0.026014	-0.00898271	0.0232961	0.0425546	-0.00492162	-0.0889234	-0.0389856	-0.0618173	-0.0572859	-0.207619
VWA3A	-0.117957	0.0456482	-0.193905	-0.00773095	-0.020568	-0.297086	-0.0941717	-0.0426434	0.00295764	0.0443401	-0.0233302	-0.0507789	0.0614835	0.0913975	0.0795792	0.397481	0.19027	0.277834	0.308103	0.76532	0.0909564	0.313422	0.129558	0.0958324	0.145796
LINC00896	0.131	0.0722368	-0.0430249	-0.294181	-0.000533924	-0.312534	-0.602755	-0.134411	-0.179958	-0.0597562	-0.0870808	-0.0254184	0.191178	0.275799	0.0480426	0.3282	0.135125	0.164204	0.693815	0.0950816	0.103381	0.0919681	0.00480708	0.229425	-0.210701
HUS1B	-0.099186	0.0658624	0.00423004	-0.0967316	-0.0707797	-0.103596	-0.655789	-0.00370181	-0.0115011	0.0497629	-0.00852528	0.254947	0.114845	0.182266	0.0989939	0.0841791	0.0834564	0.0835452	0.641385	-0.00706804	0.493759	0.0480714	0.0366479	-0.000392608	0.0437653
NPB	-0.237957	-0.0398868	-0.0263013	-0.0234557	0.550439	0.412923	0.0334851	0.11244	0.650452	-0.0807672	-0.0646178	-0.0772821	-0.060743	-0.0760143	-0.0849048	-0.0745838	-0.0521919	-0.0557424	-0.066164	-0.0797303	-0.0455374	0.0783469	-0.0360936	-0.0159409	0.275505
CCDC34	-0.0217215	0.0497663	-9.87255e-05	-0.0204092	0.0571048	0.0437656	-0.760195	-0.0502606	-0.0581833	-0.0144231	-0.0491727	-0.0108434	0.166926	0.211496	0.124345	0.129438	0.131941	0.171306	0.77476	0.0201539	0.0882751	0.0404002	0.0343207	0.0131914	-0.0785797
LRCH3	0.0291906	0.0614029	-0.0049386	-0.0508106	-0.109137	0.0409554	-0.779907	0.00174467	0.0331966	-0.0243138	-0.0616798	-0.013521	0.216948	0.236935	0.159725	0.203995	0.185324	0.230404	0.85178	0.0649024	0.118222	0.0756325	0.0921788	0.0493983	-0.102763
INTS4	-0.305624	0.110037	0.114178	0.50064	-0.113792	-0.0520649	0.282795	-0.0363659	0.0903959	-0.113173	0.0139321	-0.118289	-0.154576	-0.173069	-0.0873676	-0.0844285	-0.0760415	0.221851	-0.189236	0.0122357	0.467467	-0.0236868	0.554844	0.328571	0.397654
ENAH	-0.547039	0.0700721	-0.0470371	0.294252	0.225611	0.20667	0.290134	0.231778	0.0935203	-0.176695	0.37676	-0.170886	-0.0633871	-0.206718	-0.119299	0.172818	0.28616	0.325302	-0.076325	0.210433	0.416899	0.318388	0.403337	0.182348	0.644601
STK35	-0.0338509	0.0596118	0.0251302	-0.0338743	0.0194793	-0.0374095	-0.672709	-0.04036	-0.0484909	0.0718964	-0.00921457	0.00300683	0.180351	0.207634	0.147077	0.178374	0.166358	0.204973	0.701165	0.0306941	0.0929777	0.0593572	-0.000574251	0.0369532	-0.0435055
LRRIQ3	-0.0037118	0.0212412	0.378361	-0.0222398	0.0433105	0.00778608	-0.211349	-0.0841888	-0.0429253	-0.00829557	-0.117044	0.0541276	0.0923343	0.0909204	0.0362906	0.0773523	0.0647146	0.180509	0.40525	-0.00376103	0.00200523	0.021974	0.0407964	-0.0262947	-0.0933005
KLC4	-0.00833064	0.160849	0.0345267	-0.0868135	-0.0623541	-0.0831144	-0.741691	-0.10178	-0.0781008	0.0378079	-0.0939291	0.0114188	0.338945	0.293166	0.258832	0.325806	0.289555	0.431637	0.916401	0.055425	0.134569	0.160371	-0.0221645	0.111892	-0.0742791
TIPRL	-0.0128685	0.219661	0.0250717	-0.0236056	0.0189501	-0.205123	-0.366827	0.0650042	0.275788	0.0227704	-0.360952	-0.181832	0.0867372	0.00765879	-0.167342	0.143566	-0.031425	-0.0788681	0.282383	-0.291088	0.00225359	-0.197566	0.114634	0.0637068	-0.0512893
VKORC1L1	0.242789	-0.0430111	0.0741946	-0.0980911	-0.113334	0.128483	-0.268919	-0.133897	-0.122761	-0.171603	-0.218734	-0.165249	-0.0881107	-0.0722204	-0.0965774	-0.101369	-0.0927208	-0.12362	0.103719	-0.134319	-0.119503	-0.152666	-0.0310269	-0.0138598	-0.260903
PRF1	0.209906	-0.0570479	-0.0897482	-0.138639	-0.113714	-0.14687	-0.446364	-0.146274	-0.0748923	-0.0339698	-0.068329	0.167465	0.0854637	0.630511	0.305914	0.317363	0.0356029	0.0309944	0.416286	-0.0185641	-0.00402411	-0.0526815	-0.0500996	-0.106567	-0.251613
FBXL14	-0.0589182	0.113733	0.0794989	0.00840362	-0.229794	-0.362782	-0.384446	-0.141242	-0.151684	0.715467	0.0838981	0.0908526	0.238764	0.159504	0.189336	0.242029	0.219822	0.286654	0.552978	0.0517993	0.105108	0.130534	0.00690258	0.093267	-0.00677138
PPIL6	-0.298371	0.399019	-0.00392162	0.0498593	0.04555	-0.118931	0.0621344	0.0344784	-0.010548	0.00072601	0.0475255	-0.0862578	-0.0449619	-0.0426816	0.0187206	0.160044	0.0490527	0.411944	0.175287	-0.089409	0.623675	0.428068	0.282158	0.181799	0.398066
SP1	0.740417	-0.181688	-0.179405	-0.241524	-0.238886	-0.204714	-0.220963	-0.238369	-0.210502	-0.139832	-0.232985	-0.13912	-0.056939	-0.0953415	-0.121808	-0.128011	-0.152142	-0.1857	0.0311849	-0.163585	-0.159156	-0.213466	-0.191224	-0.204057	-0.668646
C18orf25	0.0645764	0.00553807	-0.13738	-0.00780116	-0.0771926	-0.155359	-0.540509	-0.0381737	-0.0563659	0.00433615	-0.0924901	-0.11638	0.221431	0.649315	0.0352213	0.0772712	0.275045	0.0249306	0.466169	-0.0200206	0.0118684	-0.0658816	-0.0301508	-0.025978	-0.189699
METTL6	-0.165465	0.052	0.0134312	-0.0263178	0.080619	0.047744	-0.0328202	0.55511	0.00770357	0.00660608	0.0127326	-0.0111491	0.0423566	0.0336188	0.0500418	0.0640526	0.0847662	0.737691	0.234675	0.0256734	0.019763	0.0534371	0.0183011	0.0375048	0.216065
SGOL1	-0.465096	0.345893	-0.073952	-0.0516366	0.13172	0.000669698	0.417706	0.143581	0.252389	0.00703384	0.541675	-0.0297603	-0.183629	-0.219941	0.137204	0.141742	0.478456	-0.0255063	-0.23646	0.0652996	0.291028	0.300696	0.160636	0.195903	0.656572
B3GALNT2	-0.0595128	0.00230792	0.00418005	-0.0290662	0.302102	0.0119203	-0.789963	-0.0495346	-0.0216145	0.0715188	-0.025186	0.0172801	0.106066	0.217112	0.0709434	0.0803955	0.0907292	0.103051	0.717667	0.00395146	0.0988758	0.0085236	0.0502224	0.0282203	-0.0445029
CBR4	-0.12707	0.170055	0.431056	0.298545	0.198769	0.338678	0.0523609	0.00918046	0.139999	0.057311	-0.143188	-0.0815887	-0.118088	-0.112484	-0.23226	-0.324192	-0.00933718	-0.0600104	-0.132668	-0.347537	-0.158382	-0.0462813	-0.264688	-0.186795	0.0799196
PIK3C2A	0.0213142	-0.0464837	-0.0257611	-0.0414494	-0.0104705	-0.00104005	-0.850063	-0.0888868	-0.0522763	0.0445684	-0.0777104	-0.063095	0.0431151	0.158478	0.0522583	0.00260508	0.0221273	-0.0186899	0.639062	-0.065767	0.0138622	-0.0954364	-0.00352465	-0.070521	-0.165661
NLRX1	-0.213564	-0.137264	0.136087	0.175769	0.0854979	-0.0250931	-0.284408	0.11181	0.121208	-0.0160301	0.0973007	-0.099798	0.115191	0.233528	-0.168743	-0.151749	-0.0803274	-0.122759	0.112816	-0.156375	-0.116888	0.0135105	0.156952	-0.0532458	0.100246
ZNF569	-0.0949598	-0.00385603	0.0063427	-0.055968	0.00330046	-0.0499846	-0.741681	-0.0131242	-0.0595461	0.124885	0.0189257	0.452251	0.13154	0.22545	0.0702932	0.0683104	0.03986	0.0562836	0.664072	0.0219574	0.0166576	-0.0390825	-0.0232567	0.010979	-0.0579788
CCSAP	-0.225425	0.0354825	0.00729331	-0.0424833	-0.0273587	-0.00858757	-0.470893	-0.0152455	-0.0267178	0.0237283	-0.0274809	0.192122	0.0404636	0.115733	0.0700287	0.102409	0.0738939	0.145489	0.591652	0.0455307	0.274022	0.334936	0.285351	0.650856	0.218845
DUSP18	0.422089	-0.156212	-0.0440956	-0.207252	-0.19671	-0.189571	0.0887836	-0.0733879	-0.0144469	-0.145655	-0.209825	-0.174447	0.28811	-0.130851	-0.175535	-0.119854	-0.137968	-0.143612	-0.161242	-0.143617	-0.13468	-0.1627	0.349777	-0.0648648	-0.360361
ZNF697	0.0135307	-0.0503863	-0.13156	-0.113091	-0.106159	0.0546666	-0.175851	-0.0279415	-0.101361	0.259058	0.0129443	0.568284	0.0475893	0.517777	-0.0156914	0.0333054	0.0303881	0.0324559	0.217239	0.110809	-0.111197	0.0532985	0.0563411	0.191192	-0.0580204
ZNF791	-0.435195	0.211719	0.197382	0.103625	0.385943	0.320922	0.334801	0.188073	0.173805	0.149567	-0.00317111	0.337324	-0.122656	-0.211802	0.0753639	-0.0247422	0.255907	0.325188	-0.216114	-0.106094	-0.377104	0.133485	-0.0360333	0.169111	0.495225
CHRM3	-0.30886	0.257168	-0.0232707	-0.078	0.320702	-0.0175759	-0.419238	-0.0138471	0.249956	-0.00678659	0.0873951	0.196013	-0.0326339	0.0607758	0.0148857	0.203511	0.00690826	0.0257084	0.406329	-0.0288258	0.243383	0.338817	0.130047	-0.0369709	0.305385
HTRA4	-0.258765	-0.00828908	0.121228	-0.00387161	0.0107454	0.311159	0.124443	0.00430117	-0.0663761	0.0547243	0.785147	0.119594	-0.105491	-0.127419	-0.0706231	0.015534	-0.0148976	0.341872	-0.0621341	-0.0357043	-0.0146908	-0.0139661	-0.0370073	0.00591695	0.280801
LINC00525	-0.297487	-0.0286627	0.105927	0.235372	0.0955508	-0.0784143	0.303962	-0.023401	0.229025	0.369533	0.0697453	0.0132872	-0.160929	-0.196038	0.625235	-0.0702227	0.19467	-0.0622927	-0.297376	-0.0901717	-0.027514	-0.0504685	0.224887	-0.0473337	0.344908
PRPF38A	0.351815	-0.0040951	0.0106071	-0.12371	-0.280559	-0.119295	0.390687	-0.260716	-0.113065	-0.182342	-0.189583	-0.103298	-0.178812	-0.108907	0.0114933	0.137008	-0.139729	-0.0914131	-0.433916	-0.278489	-0.0764891	0.0803595	0.125908	0.00283215	-0.181038
FAM218A	-0.0604319	0.112418	0.0665079	-0.0779868	0.0985514	-0.0545276	-0.805515	-0.05466	0.00723189	0.13824	0.03705	0.0552728	0.242113	0.27291	0.226591	0.308369	0.239522	0.317748	0.955682	0.109185	0.145798	0.124759	0.107163	0.143336	0.00390943
RHEBL1	-0.474442	0.045662	-0.00932716	0.00662473	0.23143	-0.0429932	0.397242	0.281584	0.438662	0.104087	0.231002	-0.0247945	-0.152224	-0.177388	0.0200386	0.280462	-0.0307234	-0.0279083	-0.204314	-0.031667	0.448229	0.563847	0.286136	0.212594	0.660044
FAM195A	-0.104991	0.317713	-0.056899	-0.0718156	0.0478446	0.122627	0.416865	0.0833201	0.0848663	-0.0697837	0.0406729	-0.0896048	0.281159	-0.102549	0.289308	0.270321	0.017607	0.307848	-0.142368	0.1931	-0.327351	-0.0662789	-0.0397329	0.211254	0.144748
ZNF548	0.0737127	-0.147952	-0.159196	-0.0130817	0.0142401	-0.165376	0.0687896	-0.128012	-0.176454	-0.0217989	-0.0595696	-0.0309205	-0.0305503	0.113867	-0.0904689	0.161836	-0.069984	0.109072	0.0574837	0.784452	-0.0724629	0.288291	0.191358	0.0640548	-0.0738667
AMER2	-0.00548055	0.00734421	0.0176093	0.0281116	0.0658421	0.0383563	-0.881528	-0.0229578	0.0183892	0.101281	-0.0221153	-0.030081	0.153834	0.285265	0.101008	0.0717361	0.109264	0.0767681	0.790776	-0.00233932	0.0822332	-0.00451177	0.0661518	-0.0108052	-0.0889028
RNF152	0.0342442	0.0411409	0.0172801	-0.0790383	-0.0125045	-0.0645684	-0.788958	-0.0793835	-0.022555	0.00906867	-0.0388689	-0.0100908	0.14065	0.204063	0.118934	0.11663	0.127862	0.202868	0.759953	0.156542	0.194895	0.0277257	0.0189764	0.0362206	-0.111813
GPR97	0.0934773	0.114323	-0.0275273	-0.0981687	-0.127059	-0.307271	-0.774612	-0.0439062	-0.0256607	0.153444	0.0378564	0.0481285	0.288289	0.335648	0.179352	0.287802	0.262136	0.326135	0.920965	0.0879781	0.170146	0.14921	0.0109726	0.0781443	-0.120653
ZNF644	0.140457	-0.13347	-0.13078	-0.0639995	-0.0714987	0.0713212	-0.536241	-0.16862	-0.136656	-0.125131	-0.165827	-0.128514	-0.0793814	-0.0448859	-0.100774	-0.114266	-0.120498	-0.14522	0.212689	-0.16429	-0.0637307	-0.161269	-0.103239	-0.151553	-0.277529
TBC1D32	-0.0407079	-0.115593	-0.0319875	0.110701	0.0445923	0.7176	-0.0955362	-0.0133862	-0.0899922	-0.0811211	-0.162631	-0.109267	-0.075191	-0.0879523	0.0754534	-0.10979	-0.096064	-0.106926	-0.00266291	-0.217925	-0.0626667	-0.0923415	-0.124341	-0.105431	-0.0731743
B4GALNT3	0.0534777	-0.00647168	-0.00511923	-0.170089	-0.00170222	-0.0360717	-0.640648	-0.0560527	-0.0163856	0.0895071	-0.0564173	-0.0139266	0.230176	0.25539	0.0996585	0.0712467	0.0705539	0.0604886	0.572641	0.00806529	0.0108084	-0.0357038	0.00176141	-0.029094	-0.163078
LRRC43	-0.00662963	0.027637	0.0456395	0.0730401	0.0575503	0.0547996	-0.479191	0.0412301	0.050029	0.0955639	0.0203123	-0.00387353	0.131576	0.23335	0.11064	0.0808381	0.109059	0.0784063	0.528345	0.0148346	0.0617474	0.029086	0.0724663	0.0154602	-0.0077849
CEP89	-0.46797	0.147015	-0.0187454	0.437528	0.251536	0.244649	0.469791	0.0465457	-0.0634748	-0.0854023	0.508657	0.00810343	-0.17789	-0.242174	-0.139455	-0.0964651	0.163693	0.289495	-0.358589	0.283894	0.0300838	0.0856689	0.237681	0.0521353	0.533032
AK7	0.063428	0.26984	0.676781	-0.012839	-0.127185	-0.220873	-0.114711	-0.146862	-0.0622621	-0.0646673	-0.141115	-0.108091	-0.0388862	-0.0356216	-0.0311737	-0.0571499	-0.0387948	-0.0549186	0.141352	-0.088494	-0.0711892	-0.0844654	-0.0676934	-0.0800618	-0.135621
ZFC3H1	-0.234073	0.0344538	-0.00590363	-0.0182433	-0.0602039	-0.085336	0.087723	-0.0110795	-0.0292823	-0.0556179	0.0652612	-0.09847	-0.0472791	-0.0628762	0.12608	0.487556	0.563888	0.0741843	0.0463912	0.223024	0.0211818	-0.0052964	0.669578	0.096864	0.311683
IRAK2	-0.00610125	0.0897066	0.0629641	-0.0283692	0.0337951	-0.000673311	-0.699603	-0.0393079	-0.00170253	-0.0107163	-0.0925295	0.000168811	0.209556	0.238754	0.113897	0.182904	0.177684	0.24368	0.82627	0.0668106	0.107563	0.0793341	0.0458594	0.0805666	-0.072569
LINC00337	-0.126738	0.0724967	0.0165073	-0.0466316	-0.00999224	-0.0527851	-0.2663	0.00395287	0.0303659	0.0253836	-0.0014958	-0.00334159	0.0866658	0.131387	0.43719	0.153576	0.120316	0.170133	0.453014	0.0560915	0.126975	0.833699	0.0458575	0.0715468	0.195486
METTL21A	-0.358237	0.495967	0.085941	0.117309	-0.0962678	-0.0938997	0.0464373	-0.0770598	0.173301	0.0170337	0.112278	-0.107419	-0.200235	-0.138069	0.195556	0.376691	-0.00714583	0.237766	0.138969	-0.0133566	0.216912	0.206939	0.284038	0.633495	0.501609
OTOGL	-0.197025	0.02111	-0.00709885	0.675083	-0.0434914	-0.0636433	-0.204821	-0.0374457	-0.0240801	-0.0612383	0.0239798	-0.0182933	0.0209957	0.00284036	-1.06427e-05	0.026701	0.0398786	0.051914	0.271717	-0.0260029	0.652007	0.121037	0.0369712	0.0455238	0.218091
MGC16025	-0.0263373	0.0892659	0.0390368	-0.0710302	0.147423	0.041787	-0.852947	-0.0343401	-0.0196572	0.0724513	-0.0511856	0.00368277	0.247163	0.247575	0.162009	0.199545	0.195897	0.277438	0.903471	0.0668304	0.12619	0.0858702	0.0317692	0.0678175	-0.052504
FAM76B	-0.292681	-0.0486943	0.0550976	0.365363	-0.0981361	0.267773	0.0192731	0.0865987	-0.0653977	-0.161	-0.0344157	-0.119042	-0.215592	-0.204331	-0.13358	-0.115406	-0.158486	-0.112793	-0.0629625	-0.15098	0.418011	0.45143	0.229757	0.135212	0.332277
SPATA25	-0.0067909	0.0355716	0.0521895	0.0707241	0.0467654	0.0448992	-0.50677	0.0372963	0.0502854	0.0975269	0.0202381	-0.00123698	0.138335	0.239692	0.117874	0.0919073	0.112946	0.094191	0.562385	0.0146952	0.0797936	0.0336928	0.0692979	0.0224692	-0.00860025
NXNL1	-0.142805	0.0608067	0.0150342	0.0182086	0.0127191	0.00985131	0.0313826	-0.0120524	0.0191259	0.0651646	0.0170286	-0.0887822	0.025331	0.0272312	0.0898335	0.0790381	0.825872	0.624965	0.155355	0.0237207	-0.00256083	0.0107233	0.165525	0.0146593	0.20011
GLIS3-AS1	-0.0525036	0.116095	0.0550981	-0.0572887	-0.0576891	-0.0786748	-0.689075	-0.0548122	-0.0340511	0.0783052	-0.0226227	-0.0122397	0.227173	0.219655	0.186991	0.260187	0.235938	0.253371	0.783212	0.0396955	0.139737	0.116805	0.0130339	0.077479	-0.0254413
IQCG	-0.166534	0.0698853	0.0562325	0.0424114	0.0611228	-0.0596144	-0.399773	-0.0764357	-0.10807	0.628088	0.043948	0.00481445	0.0934423	0.0693776	0.0918848	0.133244	0.110174	0.374819	0.495136	0.0378716	0.0937238	0.070389	0.544849	0.0881089	0.158377
MCM9	0.193849	-0.091381	-0.0707399	-0.112879	-0.0421093	-0.0506029	-0.640286	-0.125656	-0.123004	-0.00426541	0.0351999	0.101949	0.0683064	0.0829457	-0.0808588	0.0356602	0.0560635	0.425456	0.592024	-0.0472921	0.0950851	-0.0346586	-0.0380959	-0.0291234	-0.210686
PRR14L	0.0443213	0.121678	0.0872537	-0.0587308	-8.20911e-05	-0.058619	-0.606377	-0.15215	-0.0125328	0.0578107	-0.214086	-0.0227784	0.309643	0.346658	0.0827777	0.265725	0.290079	0.536922	0.838792	0.0759305	0.115298	0.145421	0.0189002	0.065276	-0.135358
AJUBA	-0.451022	0.117519	0.0569712	0.503245	0.0763394	0.1356	0.464388	-0.177052	0.0561423	0.0470173	0.176687	0.0704015	-0.24642	-0.132271	0.0780649	-0.0385081	0.00473547	-0.0176253	-0.435436	0.0927646	0.0672618	0.287343	0.033837	0.138411	0.481452
KLHL32	-0.136274	-0.00109203	-0.0163021	-0.0454562	-0.000792011	0.0293345	-0.272429	0.876282	0.0211696	-0.0130175	0.0138567	-0.00980654	0.0534579	0.0638937	0.0135459	0.0272989	0.0171121	0.0211681	0.309161	-0.00271573	0.0367301	0.0150901	0.0118301	-0.000812638	0.147883
DCBLD1	-0.00750479	0.114565	-0.310082	0.0700408	0.00585865	-0.0573775	0.665388	0.0859589	0.0132969	-0.0146718	0.167758	-0.00439932	-0.047976	-0.185771	-0.136053	-0.00184189	-0.0889267	0.0846117	-0.55474	-0.068912	0.0675988	-0.362557	0.271408	0.18191	0.124045
SLAMF9	0.114755	0.0988627	0.0436534	-0.0785282	0.0122919	-0.184904	-0.648777	-0.107421	-0.0670427	0.164143	-0.0589781	0.0236662	0.279092	0.315322	0.0966496	0.268289	0.217836	0.238872	0.803509	0.0832924	0.123036	0.101431	0.00935086	0.0722338	-0.144057
GK5	0.284332	-0.116737	-0.142677	-0.109561	0.311357	0.347207	-0.412973	-0.136205	-0.164338	-0.143965	-0.214731	-0.146862	-0.0170545	-0.0679688	-0.113132	-0.0874624	0.0110529	-0.0737243	0.230607	-0.121007	-0.0669766	-0.115637	-0.158074	-0.102292	-0.273995
FLJ31715	-0.145005	-0.028925	0.0599045	-0.0825282	0.450071	0.419256	0.147398	0.0131092	0.0477174	-0.0789136	-0.111714	-0.115168	-0.0816373	-0.130816	-0.0932867	-0.0492899	-0.0584544	-0.00335036	-0.0663101	-0.0348904	-0.0967298	-0.0335313	-0.0433497	0.557793	0.148939
UBE2U	0.0114789	0.0829004	0.0578702	-0.0408147	-0.00230449	-0.0348737	-0.90387	-0.0439095	0.0102031	0.0559863	-0.0361326	0.018996	0.223133	0.275069	0.168828	0.193406	0.194142	0.210947	0.939412	0.0683136	0.132743	0.0698751	0.0523857	0.0587593	-0.0851291
WBSCR27	-0.0996328	-0.0178371	-0.0314153	-0.0356009	-0.0869707	-0.0824948	0.0207784	-0.0466489	0.046503	-0.0774023	-0.021391	-0.0493519	-0.0344056	-0.0486987	0.031178	0.218381	-0.0251247	-0.0152018	0.00289786	0.929981	-0.0145896	0.000879659	-0.0626928	0.0149077	0.0692933
LINC00638	-0.00673677	0.11575	0.0767763	-0.0892453	-0.0339684	0.0502914	-0.743831	-0.011209	0.269324	0.116612	-0.249763	-0.0169789	0.266532	0.234654	0.155559	0.237566	0.194003	0.17792	0.839178	-0.0110205	0.130889	0.119957	0.0879606	0.0734574	-0.0467824
ZC3HAV1L	-0.010181	0.110461	0.0544801	-0.0404935	-0.0262895	-0.0753196	-0.686847	-0.0575389	-0.0153126	0.0140725	-0.00280842	0.0196433	0.228075	0.215296	0.13567	0.214871	0.204546	0.261486	0.845036	0.103088	0.142896	0.150869	0.0956954	0.0831675	-0.0406286
RASGEF1B	-0.0817411	-0.0119813	-0.0800453	-0.00517582	0.023807	0.0036679	-0.536542	-0.0143605	-0.123478	-0.0545201	0.0197037	-0.0146376	0.0754948	0.0312341	-0.0997895	0.0504595	0.07242	0.0288582	0.403461	-0.123856	0.0948948	0.0367296	0.105212	0.0178667	0.00503944
C11orf45	-0.193788	-0.00737782	0.062231	0.0923658	-0.00652467	-0.278445	-0.150072	-0.0604923	-0.0288425	0.0232729	0.107132	-0.0214318	0.00802741	0.070994	0.174599	-0.151224	-0.236519	-0.175741	0.0246035	0.0491043	0.430108	-0.183838	0.0190564	-0.217168	0.0128515
C21orf58	-0.146345	0.129195	0.0507715	-0.0411381	0.00352126	-0.0238397	-0.565682	-0.0630958	-0.018304	0.085685	-0.00575842	-0.0331105	0.277259	0.148832	0.207027	0.353186	0.232582	0.40291	0.808288	0.0896593	0.137909	0.174666	0.0689833	0.525816	0.104386
KIAA1109	-0.0206164	0.0465404	-0.00472296	-0.0832555	-0.074033	-0.0962337	-0.774059	-0.0901609	-0.0341191	-0.00477739	-0.0565296	0.0365829	0.137698	0.183003	0.0966943	0.131092	0.117075	0.136302	0.768871	0.019449	0.419647	0.0682406	0.0226222	0.0463459	-0.0645469
STOML3	-0.0439959	-0.0224697	-0.0294974	0.366621	-0.0452085	-0.0626061	-0.105179	-0.0203768	0.72854	-0.111624	-0.0307511	-0.0435531	0.00497668	-0.0980315	-0.0681141	-0.00387222	-0.0190852	0.0211442	0.112865	-0.0870138	-0.0154403	-0.0258305	-0.10062	-0.0376942	0.0841011
LINC01105	-0.0763918	-0.0115137	0.000860093	-0.0235683	0.292162	0.0182035	-0.571185	-0.0449334	-0.0314154	0.0628686	-0.00490931	-0.026147	0.0442352	0.117188	0.0544408	0.0361441	0.0502039	0.0669879	0.484148	0.105065	0.0545991	-0.00803802	0.105981	0.0185463	-0.0137234
FBXL13	-0.0718224	-0.0427008	-0.0237829	0.283442	0.0224907	0.00123422	-0.591147	-0.0685786	-0.0597383	0.0575453	-0.0226298	-0.0108688	0.0444259	0.35903	0.0370576	0.00285843	0.013897	0.0207866	0.459333	-0.0225202	0.0100808	-0.0653565	0.100809	-0.0318765	-0.0679622
FAM227B	-0.0395375	0.0422797	0.0396261	0.237768	-0.00861155	0.00425458	-0.690907	-0.00796505	0.0100002	0.0437931	-0.02869	0.0662572	0.157923	0.2236	0.0966114	0.104802	0.131059	0.109771	0.708207	0.0101141	0.0916091	0.0253068	0.0588672	0.0180373	-0.0158984
DTD2	-0.447754	0.229794	-0.182325	0.0324822	0.136993	0.210035	-0.329605	0.158749	0.0640289	-0.308317	0.270652	-0.12679	0.0321758	-0.0546203	0.0448934	0.00170144	0.233865	0.13928	0.385074	0.0922021	0.439903	0.316454	0.25148	0.248123	0.457395
SOX3	-0.0314939	0.162337	0.0861148	-0.0257611	-0.0479406	-0.0857648	-0.494714	-0.0205858	-0.00241441	0.0581504	-0.0309609	-0.00716075	0.234106	0.189021	0.256089	0.299073	0.294334	0.815658	0.761527	0.1074	0.129619	0.15184	0.0465026	0.118976	0.0576942
SPATA32	0.274951	-0.0612443	-0.0415781	-0.227655	-0.0586354	-0.0822202	-0.730664	-0.124014	-0.0782122	0.0353145	-0.356784	-0.0966992	0.374817	0.468975	0.0595203	0.0356171	0.0386373	0.0374282	0.639058	-0.0417854	-0.061423	-0.101673	-0.0424577	-0.109698	-0.449105
C3orf49	0.170011	-0.00688368	0.0366827	-0.0484307	0.00941761	-0.0793035	-0.764931	-0.0774728	-0.0473056	0.0850285	-0.0949931	-0.0784832	0.151938	0.210388	0.0950576	0.0763463	0.0816154	0.100493	0.757521	0.157206	0.0536007	-0.0251993	0.00995909	0.1851	-0.185373
NKX2-3	0.149754	-0.154401	-0.147102	-0.139975	-0.109578	0.0152266	-0.0589409	-0.132325	-0.129809	0.556913	-0.121991	0.0340148	-0.0456334	0.425134	-0.128957	-0.131473	-0.152456	-0.138406	-0.12355	-0.136392	-0.157168	0.0659124	-0.1602	-0.156966	-0.237385
TMEM252	-0.00707406	0.0335866	0.0470647	0.0650449	0.0470027	0.0506996	-0.524155	0.030409	0.0418537	0.0934281	0.0137494	-0.00599173	0.143584	0.245864	0.11783	0.100859	0.120923	0.0927216	0.574167	0.018772	0.0670983	0.0322141	0.0718429	0.0186757	-0.0144983
KIAA1524	-0.374194	0.0174501	-0.0793421	0.00400201	-0.0356525	-0.000510323	0.209774	0.0339361	0.0637699	-0.143772	0.377247	-0.0654664	-0.120824	-0.164803	-0.0540032	0.221368	-0.0471795	0.0175367	-0.046301	0.0169082	0.414838	0.480711	0.584309	0.513119	0.504744
FAM222A-AS1	-0.0608146	0.114811	0.0830442	-0.00322298	-0.00778595	-0.0116483	-0.69623	-0.0171333	-0.00856232	-0.00190653	-0.00792415	0.0100682	0.227162	0.177206	0.141162	0.24099	0.231	0.274668	0.838091	0.0861888	0.144556	0.144683	-0.0155062	0.130183	-0.00227482
TLE6	-0.171548	0.0407009	0.00636443	0.03265	-0.00558007	-0.0265513	-0.159554	0.0516389	0.00738473	0.0356231	-0.0576102	-0.089185	0.049664	0.0946656	0.0605482	0.0778192	0.0575203	0.0898907	0.326476	0.045027	0.0824003	0.748497	0.0814424	0.581156	0.245655
TCEANC	-0.2166	0.0887318	-0.0856314	-0.0548715	-0.0193412	-0.130115	0.173905	-0.0538035	-0.0312387	-0.0195022	0.111957	-0.0404882	-0.0914032	-0.11147	-0.114751	-0.0627291	-0.0760309	-0.0894517	-0.0904695	0.570545	0.715332	0.261025	0.256945	0.0376137	0.253784
HECTD4	-0.0752	0.181264	0.0555783	-0.00190272	0.0300215	0.0297977	-0.724103	0.0242163	-0.0418495	-0.00216987	0.00745305	0.0370777	0.317594	0.333867	0.186371	0.354754	0.326114	0.409712	0.946848	0.103513	0.191119	0.208585	-0.026225	0.12756	0.0293389
RTP1	0.0406943	0.114573	0.0512242	-0.102137	-0.0857657	-0.0597897	-0.848807	-0.0741062	-0.0279778	-0.00598822	-0.097648	-0.00199497	0.263144	0.266396	0.188211	0.238614	0.23373	0.257672	0.927925	0.0818223	0.139211	0.0910136	0.052326	0.0713107	-0.119975
PRR35	-0.182956	0.0125687	-0.0299032	-0.0336516	-0.083525	-0.06103	-0.0105794	-0.051926	-0.0713112	-0.0409818	0.328916	-0.0103511	-0.0100481	-0.0183682	-0.0409781	0.0393579	0.0116473	0.196345	0.119529	0.160046	0.039636	-0.00541309	0.687691	0.0498918	0.160524
NXPE1	-0.0672525	0.0112329	0.0707439	-0.0265743	-0.0741219	-0.0868114	0.0569683	-0.00737765	0.0636775	-0.0423016	0.0358035	0.0635772	0.0587977	-0.0191741	0.951171	0.0209577	0.0234958	0.00821282	-0.0186667	-0.0219199	-0.0430577	-0.00780263	-0.0355935	-0.0386755	0.081155
CYP1B1-AS1	-0.0676638	0.176593	0.106055	-0.0427083	-0.0381125	-0.0909306	-0.727096	-0.048527	0.031203	0.123607	0.00755544	0.0327063	0.334648	0.309134	0.261208	0.364655	0.323956	0.406105	0.958701	0.112072	0.165395	0.183063	0.0388033	0.119905	0.0201108
APOBEC3D	0.00287584	-0.183192	-0.0979471	0.00119411	-0.123111	-0.130243	-0.74659	-0.00259316	-0.0731277	0.167128	0.0304536	0.0483209	0.181941	0.293081	-0.059143	0.150452	0.16241	0.161646	0.728409	0.0750107	0.140014	0.0619333	0.111054	0.0658845	-0.120014
LINC00315	0.0638704	0.1703	0.0515072	-0.0314669	-0.031875	-0.131823	-0.776718	-0.0974826	-0.0964165	-0.0479038	-0.0987683	0.0022058	0.445871	0.363624	0.246153	0.285198	0.342566	0.29406	0.917451	-0.0284989	0.0903577	0.0931838	-0.032869	0.050117	-0.162725
COL6A5	-0.0240922	-4.90932e-05	-0.00147731	-0.0422673	0.0309782	-0.0164722	-0.620784	-0.0624705	-0.0264054	0.0341983	-0.0165999	0.0215835	0.0847241	0.148738	0.0560595	0.0470434	0.0636037	0.0725743	0.491623	-0.00815256	0.0613109	0.00129912	0.012844	-0.0178065	-0.0584234
PGAM5	-0.0476463	0.130402	0.0315103	-0.105993	-0.0978433	0.0165805	-0.695093	-0.00734134	-0.0681661	0.168936	-0.0872308	0.0210956	0.379773	0.395593	0.218475	0.406381	0.300895	0.377397	0.910171	0.118458	0.0834465	0.132745	0.0191289	0.0999658	-0.060395
C4orf45	0.0224569	0.153756	0.0699745	-0.052434	-0.0450712	-0.123843	-0.806985	-0.0550165	-0.0078272	0.0557406	-0.03728	0.0268352	0.324676	0.326872	0.213194	0.311892	0.289951	0.346617	0.981735	0.125993	0.172655	0.163536	0.0512874	0.120874	-0.0618287
CCDC149	-0.017832	-0.00681379	0.00439494	-0.0244346	0.045301	0.000786517	-0.728947	-0.056277	-0.026582	0.086089	-0.0246686	-0.00999535	0.102759	0.181235	0.102726	0.0649414	0.0719968	0.0700633	0.632823	-0.00108322	0.0550022	-0.0322096	0.00173908	-0.00867005	-0.114814
BEND2	-0.0537306	0.076207	0.0555017	-0.0362362	0.0409961	0.00281854	-0.812381	0.11794	0.0184763	0.0454914	-0.0331931	-0.00361855	0.216152	0.271965	0.184915	0.157904	0.185839	0.456947	0.884248	0.0498471	0.124899	0.0701268	0.0513084	0.0712132	-0.00747793
C10orf67	-0.143892	0.484139	0.0119658	0.0330962	-0.0604462	-0.0757251	0.0409822	-0.0249363	0.098693	-0.0271468	0.0101495	-0.0649146	-0.0048523	-0.0113573	0.0210334	0.823967	0.0593008	0.0542075	0.139635	0.26441	0.00591	0.0181307	0.00552519	0.0274967	0.245108
SPERT	-0.335047	0.233734	0.119553	0.111668	-0.0315638	-0.0798619	-0.555685	0.0184339	0.0476674	0.180594	0.125877	0.110975	0.345609	0.341383	0.240253	0.37749	0.356929	0.343072	0.831615	0.179462	0.190944	0.240576	0.145938	0.194915	0.241001
CCDC26	0.00657807	0.11159	0.0623656	-0.0598381	-0.0300552	-0.0649512	-0.894635	-0.0542842	-0.00784542	0.0459454	-0.0607478	0.0594689	0.268866	0.269822	0.172046	0.244466	0.226548	0.269543	0.974515	0.0867981	0.146593	0.102782	0.0373521	0.0862274	-0.0826926
C21orf88	0.0122484	-0.060817	-0.0518977	-0.0453172	-0.100894	-0.07762	-0.0283756	-0.0821031	-0.084269	-0.0628261	-0.11182	-0.0538237	0.0226849	0.0338392	-0.0618185	-0.0342642	-0.0517844	-0.0505344	-0.0195961	-0.0310635	-0.0755849	-0.0446284	0.0288107	-0.0610047	-0.166475
SPIC	0.0186306	0.148269	0.0814778	-0.0830887	-0.0669377	-0.104125	-0.82761	-0.0518698	-0.00417198	0.0280748	-0.0654007	0.0149851	0.321712	0.274184	0.197408	0.298314	0.279096	0.33108	0.985	0.116924	0.168128	0.151169	0.028558	0.117725	-0.0722138
VPS13B	-0.00295322	0.0369464	0.0474849	-0.00434405	0.0484538	-0.012371	-0.703643	-0.0206442	0.0150858	0.107392	-0.0116359	-0.0100428	0.149486	0.213848	0.141705	0.125394	0.144429	0.151446	0.700446	0.0402578	0.087591	0.0328941	0.0626605	0.022014	-0.0715808
P2RY10	-0.0607749	-0.0600845	-0.00937554	-0.00606333	-0.0238592	-0.0358792	-0.00847844	0.00941592	-0.0438935	0.000288415	0.0287741	0.900112	-0.00726249	0.334387	-0.0464397	-0.0238923	-0.0456823	-0.0363715	0.00203723	-0.0255442	-0.0672413	-0.0444313	-0.0484384	-0.0529747	0.000805304
IGSF22	0.139751	-0.119335	-0.102448	-0.125137	-0.0982884	-0.103966	0.243175	-0.0503732	0.465936	-0.0981425	-0.112232	-0.110651	0.0849352	-0.158639	-0.0692053	-0.0719196	-0.0652284	0.382628	-0.18507	-0.0965839	0.203444	0.0883409	-0.0973855	-0.0703592	-0.0203733
ZBTB3	-0.51587	0.190495	0.213406	-0.0710466	0.0651858	0.14861	-0.177842	0.18289	0.178372	0.206321	0.347759	0.0349818	-0.0447639	-0.0883067	0.0229756	0.170904	0.319521	0.367653	0.280005	0.2138	0.0131891	-0.00974288	0.0539458	0.0788533	0.457102
TPH1	0.0324362	0.10509	0.0525829	-0.0900051	-0.0435617	-0.0445083	-0.855143	-0.0331379	-0.0293951	0.0408574	-0.0610857	-0.00476872	0.271839	0.290974	0.217115	0.267129	0.250519	0.283251	0.948126	0.0852404	0.134748	0.0982266	0.0525893	0.0665673	-0.103125
DCST1	-0.0986441	0.0818785	0.0286156	-0.0358	0.0461979	0.431824	-0.467635	0.0343934	-0.0226417	0.00848542	-0.0943043	-0.0562926	0.712488	0.219983	0.123781	0.225816	0.221832	0.27701	0.649404	0.0442109	0.0381446	0.0976202	-0.0154334	0.0602675	-0.00796387
TCP11L2	-0.0433801	-0.012234	-0.0106718	0.0182654	0.0278642	0.00087656	-0.568285	-0.0255369	-0.0139499	0.0536595	-0.00880336	0.00223878	0.0953628	0.208271	0.0545535	0.0352211	0.140499	0.0414019	0.484399	-0.0249834	0.0388269	-0.0104593	0.0283272	-0.0312354	-0.0388277
WDFY4	-0.0668881	0.196989	0.0181963	-0.02447	0.011748	-0.020072	-0.0288441	-0.0296921	-0.0258921	-0.0185127	-0.025413	-0.035331	0.016287	0.0046332	0.00664578	0.0442682	0.0309974	0.104664	0.19208	0.0302832	0.0416357	0.0286189	0.429979	0.0326273	0.0707238
GPR26	-0.0208701	0.0529539	0.0432487	0.00212547	0.0104828	-0.0167537	-0.876907	-0.0318565	0.00141156	0.0922389	-0.0297774	0.0272577	0.278224	0.284272	0.154969	0.145771	0.157498	0.162812	0.862335	0.038581	0.101265	0.0364058	0.0321064	0.0285047	-0.0732845
KIAA0825	-0.0066696	0.0232214	0.00896774	-0.0421382	0.014268	-0.0292071	-0.959566	-0.0841681	-0.0262369	0.0412411	-0.0655168	0.0254153	0.163304	0.233339	0.120905	0.11134	0.116917	0.133148	0.876967	0.0150748	0.114191	-0.000330127	0.0268776	0.0257962	-0.120287
SESN3	0.0756977	0.112437	0.0562479	-0.0601068	-0.0427723	-0.0963874	-0.75119	-0.145388	0.0256256	0.0988469	-0.0337047	0.0124232	0.313856	0.169321	0.122549	0.319423	0.230496	0.3674	0.903895	0.0198492	0.128723	0.0936455	-0.00674906	0.054955	-0.108798
CSNK1G2-AS1	-0.0162402	0.112016	0.00968828	-0.0809557	0.00703694	-0.137457	-0.692507	-0.0674989	-0.130974	0.0940316	-0.0161951	0.0240978	0.386749	0.263678	0.248797	0.352561	0.315644	0.424614	0.905583	0.0476695	0.175603	0.175371	-0.00884869	0.0797786	-0.0753779
NATD1	-0.162166	0.104034	0.00679841	-0.00770404	-0.0610446	0.0262911	-0.367269	0.0459976	0.0268661	0.157228	0.0482307	0.0505986	0.284897	0.233387	0.328278	0.326018	0.20977	0.211878	0.564314	0.117408	-0.0825417	0.063421	0.0289849	0.154709	0.0361857
KLHL34	0.0273811	0.0874428	0.0455129	-0.00813571	-0.0592186	-0.0866073	-0.875616	-0.0548813	0.0150895	0.0499379	-0.0217296	0.0584465	0.264043	0.300367	0.176907	0.196486	0.196268	0.213742	0.934425	0.174771	0.139864	0.107387	0.0331865	0.0583285	-0.0907253
ZSCAN10	-0.0797115	0.129502	0.0572928	0.0152503	0.0359185	-0.120399	-0.645905	-0.0207653	-0.0289652	0.0366122	0.0131351	0.00763794	0.33858	0.215929	0.25024	0.425007	0.343317	0.363029	0.897541	0.0486029	0.267107	0.223607	-0.0131149	0.113137	0.0503553
SAMD3	-0.0616246	0.0963223	0.0896949	0.0219947	0.0319254	-0.0894922	-0.834064	-0.0452336	-0.0308939	0.0630722	-0.0499543	0.0047497	0.268112	0.303515	0.135484	0.218701	0.231802	0.311895	0.898032	0.0649649	0.132023	0.097921	0.0734466	0.063473	-0.0203325
GOT1L1	0.0619801	0.0234688	-0.0269614	-0.0169719	-0.0181469	-0.0907672	-0.738096	-0.147373	-0.0569744	0.0720782	-0.16571	-0.0575807	0.330341	0.255667	0.128341	0.154389	0.128374	0.247796	0.835758	0.0250967	0.0919815	0.114877	0.05999	0.0554442	-0.20978
C10orf91	0.0133288	0.0535944	0.0510333	0.00202454	0.0617471	0.0186393	-0.82667	-0.0372636	0.0232541	0.114378	-0.0201152	-0.00549137	0.181017	0.26366	0.159054	0.140642	0.158566	0.170667	0.832809	0.0565728	0.105324	0.0437111	0.049385	0.0417963	-0.0848609
MGC16142	-0.0285387	-0.0111845	-0.0298647	-0.0914109	-0.0494198	-0.094908	-0.101047	-0.0534189	0.0221275	-0.03899	0.00138076	0.0311299	-0.0399343	-0.0221438	0.809115	0.0257925	0.0167956	0.0160139	0.0836756	-0.0270725	-0.015134	-0.0197145	-0.0364224	-0.0333401	0.0143888
ZNF99	0.0205729	0.0946259	0.0571679	-0.0718358	-0.036534	-0.0661948	-0.892742	-0.0323429	-0.00896335	0.0455236	-0.0633636	0.0203061	0.257931	0.293274	0.165292	0.234766	0.212453	0.252445	0.95605	0.0780062	0.140512	0.0820317	0.0583675	0.0688317	-0.0972004
CCDC108	0.0133291	0.106749	0.0633715	-0.00135251	-0.0529962	-0.050621	-0.848702	-0.0230893	-0.011169	0.0319907	-0.0663076	-0.00386666	0.27105	0.318041	0.171865	0.257734	0.234548	0.289732	0.962084	0.0823785	0.153945	0.108051	0.0711081	0.0770882	-0.0750907
SIGLECL1	-0.0260534	0.149372	0.0822061	-0.0195622	0.0205108	-0.10721	-0.792295	-0.0462636	-0.0132638	0.0911579	-0.0106225	0.0222423	0.326277	0.307075	0.186283	0.318653	0.300236	0.454167	0.9786	0.107621	0.160655	0.144314	0.01413	0.104959	-0.0255797
LDHAL6A	-0.0122006	0.0552873	0.00271297	-0.015776	0.0430135	-0.0341441	-0.0819344	-0.0211623	0.00651806	0.0155603	-0.0364713	0.00877092	0.058674	0.0652648	0.0619178	0.245051	0.0755598	0.116946	0.276289	0.0437961	0.0350155	0.0468283	0.0205275	0.0211404	0.00663035
MRGPRX2	-0.0310481	0.16915	0.121525	-0.0624393	0.00511688	-0.0187127	-0.730678	-0.0142703	-0.0102328	0.0841932	-0.0343547	0.0114846	0.354087	0.296061	0.236482	0.354799	0.325399	0.431171	0.948631	0.109379	0.161794	0.181575	9.24944e-05	0.115252	-0.00928952
NTN5	-0.0675659	0.0485208	-0.0296565	-0.00843057	-0.0402452	-0.0260132	-0.214365	-0.0389439	-0.0458568	-0.0556262	-0.0245728	-0.0426744	0.0821397	0.0943611	0.0944186	0.114086	0.0746556	0.0988155	0.343993	0.0395767	0.114873	0.839662	-0.0113489	0.0547443	0.117426
KLF17	-0.0723549	0.103679	0.0677554	-0.0109676	0.00509725	-0.00944003	-0.64972	-0.0269218	0.00298715	-0.0259331	0.00800542	0.00621172	0.235167	0.324219	0.220262	0.698178	0.228899	0.235825	0.830135	0.0911664	0.126744	0.0991357	0.0621962	0.0791913	0.045171
CCDC105	-0.0336574	-0.0122786	-0.0247606	-0.0593438	-0.0115515	-0.0270229	-0.538607	-0.0595134	-0.0385921	0.0101256	-0.0402731	0.00241138	0.0473344	0.101201	0.0554382	0.0229943	0.0253016	0.0118821	0.41292	-0.0293136	0.0183196	-0.061531	-0.00509973	-0.0348159	-0.0756301
CCDC122	-0.0745469	0.871303	0.1239	-0.0287218	-0.0645702	-0.0555306	0.0265642	-0.0728611	0.00342121	0.0998744	-0.0700494	-0.0810997	-0.0524532	-0.0621818	0.0165392	-0.0284512	-0.00795175	0.00349668	0.0137354	-0.0605705	-0.0200346	-0.0044642	-0.0610258	-0.0436863	0.131081
C11orf42	-0.0768222	0.170167	0.106095	-0.0333264	0.0284891	-0.0194964	-0.722377	-0.0107982	0.00277988	0.144749	-0.0585184	0.00529598	0.32209	0.349607	0.280626	0.317198	0.3156	0.383107	0.944176	0.0878048	0.150615	0.202178	0.0547535	0.105486	0.0156126
DKFZp434L192	0.0116982	0.0852045	0.0506054	-0.0846886	0.0365749	-0.0763659	-0.875629	-0.00282231	0.0582589	0.0458714	-0.0612553	0.028826	0.245155	0.330056	0.207472	0.214216	0.198882	0.223587	0.94129	0.0796602	0.134389	0.0904768	0.0440655	0.107522	-0.076843
ZNF486	-0.0650109	0.0625248	0.32822	-0.0559579	-0.00862358	-0.0912122	-0.774482	-0.11124	0.253891	-0.017757	0.0290269	0.0687629	0.203424	0.14205	0.0535054	0.0726248	0.267241	0.157371	0.808542	0.020859	0.243476	0.0398179	-0.0170219	0.0323628	-0.00136261
CXorf22	-0.013327	0.122143	0.0987287	0.0336448	-0.130775	-0.0912495	-0.703392	-0.0820128	0.0237504	0.00217963	0.0579444	0.0318061	0.307905	0.207863	0.185932	0.240901	0.227519	0.246852	0.802047	0.106303	0.157964	0.160867	0.0781613	0.104662	-0.0206302
FGD2	-0.447624	0.00569816	0.0531167	0.203703	0.0863883	0.0551037	0.0157172	0.11039	0.151537	0.0226744	0.304113	0.450631	-0.115667	-0.00146706	0.17066	0.0613228	-0.319153	0.26029	-0.0025618	-0.050181	0.298932	0.192851	0.0832941	0.034702	0.475762
EXD1	-0.142568	0.052608	-0.0229166	-0.0275268	0.335901	-0.0357698	-0.389459	-0.0319159	-0.0268755	0.0117014	-0.0526712	-0.049349	0.099791	0.115833	0.0417196	0.0995987	0.0886203	0.179792	0.514048	0.0398059	0.181098	0.768592	0.0268702	0.0622863	0.172232
FAM178A	-0.175495	-0.0948137	-0.104814	-0.0823919	0.70253	0.742752	0.218582	0.0404522	-0.0969943	-0.0945401	-0.0943947	-0.10429	-0.103879	-0.150772	-0.188303	-0.139749	-0.119866	-0.0701044	-0.288607	-0.0969649	-0.139578	-0.0532171	-0.125954	-0.0573934	0.0888417
NBPF4	-0.106517	-0.0475419	-0.069967	-0.0961192	-0.0696568	-0.0612646	0.0515991	0.776452	-0.0210354	-0.0676534	-0.00250249	-0.0555981	-0.00607048	0.0329967	-0.00548479	-0.0240455	-0.042723	-0.0426726	0.0509422	0.0322696	0.239024	0.0081662	0.144072	-0.02255	0.106311
ZNF663P	0.0104072	0.0678053	0.0680985	-0.0120902	0.0271074	-0.00625703	-0.74744	-0.0247114	0.0245716	0.0848161	-0.00524476	0.00498843	0.183776	0.262894	0.160237	0.15218	0.173436	0.186008	0.764805	0.0656504	0.112372	0.0656878	0.0570964	0.04602	-0.0611629
LINC00955	-0.0599337	0.034029	0.000585373	-0.0341015	-0.0825941	-0.105884	-0.112329	-0.0473301	0.0470843	-0.0338722	0.0354633	0.0606554	0.00322319	0.0105361	0.97331	0.0830829	0.0708936	0.105444	0.164993	0.000663798	0.000901061	0.0223679	-0.0248185	-0.00819066	0.0699478
MGC34800	-0.230197	0.178869	0.17106	0.0949152	-0.126753	-0.0218091	-0.647085	0.0581183	0.031383	0.184487	0.0797016	0.0688637	0.280337	0.258337	0.242273	0.282063	0.319883	0.384704	0.876697	0.136567	0.178529	0.193348	0.14466	0.153866	0.140413
C10orf126	-0.10869	0.0576897	0.0191597	0.00193928	0.0188638	-0.0506933	-0.561469	-0.00267447	0.0290877	0.0679755	-0.010682	0.00736084	0.133142	0.212539	0.122352	0.127902	0.12205	0.176494	0.698713	0.0591668	0.311095	0.657485	0.0720373	0.121852	0.133938
PIKFYVE	-0.168299	0.0147357	-0.00289734	-0.0375307	-0.0628698	-0.0647058	-0.0423565	-0.0241531	-0.0032148	0.00223299	0.0137405	-0.0595487	-0.0346785	0.00627366	0.0349377	0.0367686	0.126276	0.0306481	0.165071	0.0293529	0.503325	0.0432238	0.0595806	0.836339	0.222405
LINC00479	-0.127984	0.00760636	0.947759	0.0879398	-0.0311328	-0.00640578	0.0670793	-0.0445509	-0.00766558	0.224785	-0.0592192	-0.0262788	-0.0652037	-0.0950215	-0.0306682	-0.0528061	-0.0190902	0.0303771	-0.0500459	-0.0613242	-0.0715418	-0.0509938	-0.0379948	-0.0481231	0.108261
C9orf62	-0.156095	0.0968006	0.0792006	0.099757	0.0483426	0.0290566	-0.638388	0.0449701	0.0871677	0.151724	0.00460442	0.0335811	0.258248	0.333923	0.175113	0.212518	0.235728	0.21925	0.792951	0.0713336	0.108015	0.125815	0.136485	0.10979	0.0851674
C9orf84	0.0851842	0.12636	0.0895885	-0.121378	-0.128328	-0.155539	-0.789052	-0.0357373	0.0178446	-0.0218943	-0.10719	0.0010679	0.299967	0.306509	0.151446	0.285913	0.24947	0.304707	0.933672	0.0953609	0.151178	0.119397	0.0795677	0.0927042	-0.119955
SLC22A24	-0.000241624	0.00433415	0.00555089	-0.0489236	-0.0407419	-0.0837269	-0.382542	-0.0932247	-0.132855	-0.0272632	-0.170976	-0.0584495	0.167539	0.178383	-0.0177485	0.117055	0.0820586	0.124063	0.402745	-0.00223746	-0.000798608	0.0275289	-0.017217	-0.0141661	-0.184663
FMO9P	-0.148595	-0.014108	-0.044782	-0.0151653	-0.0945347	-0.0941572	0.0744817	-0.0418783	-0.0809034	-0.0814705	-0.00510269	-0.10003	-0.0789396	-0.0891555	-0.090605	-0.0351847	-0.0660931	-0.0455807	-0.106089	0.443525	0.0184449	-0.0417569	0.828571	0.0341529	0.129612
C7orf33	0.0106633	0.124188	0.052111	-0.0519854	-0.0346526	-0.0481241	-0.797304	-0.0278838	0.0107778	0.0492271	-0.0510084	0.0373605	0.276522	0.282807	0.183539	0.264207	0.246859	0.285263	0.944739	0.0936146	0.150373	0.139266	0.0471537	0.119771	-0.0551248
ELMOD2	0.079231	0.141888	0.13084	-0.104539	-0.423764	-0.283773	0.140501	-0.102418	0.0537959	-0.0974446	-0.0614072	-0.321607	-0.398947	-0.314376	0.0815262	0.0449235	0.0785911	-0.0474933	-0.0874122	0.00527449	0.214968	0.126937	0.435211	0.16281	0.0688713
ACER1	0.011004	0.0109586	-0.0384638	-0.0943413	-0.10455	0.00914101	-0.517082	-0.0894462	-0.0858497	-0.0677605	-0.158649	-0.0635447	0.164344	0.165213	0.0230919	0.109129	0.0874691	0.106422	0.503936	0.00342417	-0.0299552	0.0269485	-0.0597089	-0.0337663	-0.195139
TAAR1	-0.0836221	0.10537	0.0476927	-0.0782949	-0.0749684	-0.127677	-0.569649	-0.0437329	0.00582537	0.0154688	0.00970143	0.0197345	0.229674	0.178051	0.195632	0.243767	0.186383	0.257557	0.753254	0.0760197	0.696681	0.154596	0.0970613	0.105117	0.077809
OSTCP1	0.215663	0.0678283	0.0487139	0.0287637	-0.139917	-0.201328	-0.702361	-0.161566	-0.045962	-0.136564	-0.209694	-0.038613	0.228336	0.250656	0.135469	0.22399	0.179696	0.223316	0.799925	0.071433	0.084275	0.0787423	-0.0166168	0.0567111	-0.262991
LINC00305	-0.0167567	0.0911202	0.0705879	-0.0541675	0.011698	-0.0758755	-0.853358	-0.0898483	0.0389722	0.033943	-0.0696439	0.0122978	0.254238	0.260101	0.182204	0.236765	0.233682	0.268255	0.897349	0.0592468	0.144702	0.109288	0.0488289	0.0721983	-0.0563466
BFSP2-AS1	-0.0317542	0.0863859	0.0409627	-0.0580589	-0.0249059	-0.0757807	-0.742477	-0.0516528	-0.0226912	0.026534	-0.0329337	0.0225744	0.217812	0.211416	0.140013	0.228741	0.203999	0.270855	0.769255	0.049412	0.125843	0.115674	0.0128431	0.0501418	-0.0271579
STK32A	-0.0151904	0.110013	0.0429627	-0.0847069	0.034024	-0.0436302	-0.84009	-0.0694152	-0.00163799	0.0254202	-0.0267046	0.0185953	0.245309	0.261932	0.156976	0.236957	0.229716	0.256029	0.929119	0.0925243	0.146888	0.114394	0.0685159	0.199943	-0.0466741
LRRC28	0.248588	-0.0650887	-0.0770034	-0.117149	-0.11041	-0.0959505	-0.634306	-0.124487	-0.102535	-0.0332812	-0.147767	-0.073765	0.0163701	0.07629	-0.00494527	-0.0103545	-0.00501292	-0.0466841	0.447135	-0.0875436	-0.0235063	-0.079397	-0.0435506	-0.100941	-0.283301
NS3BP	-0.0909274	0.162766	0.0394055	-0.0200154	0.0528945	-0.0299802	-0.618108	0.00280039	0.0189386	0.120359	0.039988	0.0608855	0.312714	0.301686	0.250523	0.371545	0.3188	0.450655	0.884273	0.0800921	0.170183	0.168871	0.0667389	0.112639	0.0694688
GPHB5	-0.136202	0.104654	0.0916619	0.00254666	-0.00485178	-0.0361928	-0.303804	-0.0437439	0.0227883	0.0380152	0.0475875	-0.0113951	0.148036	0.173512	0.161832	0.925827	0.170282	0.217756	0.533886	0.0591789	0.0862558	0.0742528	0.0571878	0.079748	0.156384
DCD	-0.0252436	0.119124	0.0551643	-5.50617e-05	-0.00232469	-0.0867127	-0.748681	-0.0368141	-0.0119929	0.0449899	-0.0311474	-0.0191209	0.29784	0.269174	0.183911	0.281651	0.273908	0.311009	0.88383	0.0634031	0.137266	0.154352	0.0345941	0.0758482	-0.0267297
EXOSC6	-0.022861	0.238199	-0.00356481	-0.0574921	-0.0727941	-0.0482982	-0.637381	-0.0872779	-0.0394279	0.00973182	-0.104333	-0.0886879	0.0889667	0.128407	0.0538661	0.0725759	0.0819862	0.0947803	0.593671	-0.0292452	0.0410029	0.0181057	-0.0254789	-0.00723927	-0.0681864
IQSEC3	-0.0380785	0.0897557	0.0597305	-0.0136154	0.0750353	-0.0207505	-0.744121	-0.0295516	0.000854482	0.0774022	0.00696235	0.011085	0.208949	0.253571	0.168881	0.200883	0.183176	0.237864	0.788257	0.0635006	0.134126	0.0990233	0.0550164	0.0749222	-0.020578
ZDHHC19	-0.00402745	0.0469029	0.0630663	0.0658935	0.0672548	0.0552414	-0.628613	0.0367411	0.0544505	0.111804	-0.00746164	0.00149557	0.171837	0.281414	0.147126	0.116532	0.148387	0.121344	0.675205	0.0269187	0.0867897	0.0411751	0.0850677	0.0224677	-0.0216245
ALG14	0.413153	-0.064012	-0.148337	-0.287527	-0.269129	-0.209047	0.399827	-0.00558688	-0.0185565	-0.181132	-0.142431	-0.0770646	-0.119204	-0.215493	-0.123526	-0.121745	-0.615134	-0.181885	-0.402665	0.0640204	0.0909845	0.0892894	-0.0881859	0.0482631	-0.305612
PPP1R21	-0.0423765	-0.0437063	0.169564	0.0261487	6.09745e-05	0.128579	0.652102	-0.119539	-0.0308885	0.0648899	0.111906	0.15743	-0.126655	-0.311844	-0.217862	-0.306314	-0.401692	-0.130355	-0.575591	-0.205676	0.0646079	0.17004	0.00813	0.256001	0.0954748
TMEM237	-0.360219	0.00526875	-0.016732	0.355342	0.108432	0.0241664	0.500383	0.0899359	-0.0134805	-0.243821	0.161943	-0.304803	-0.399132	-0.313481	-0.0978573	-0.171801	-0.0263812	-0.198524	-0.532174	0.0453691	0.264643	0.285181	0.130977	0.236499	0.437901
ZNF564	-0.0253717	-0.00482919	0.0903293	-0.0543999	0.0769148	0.116753	0.594014	0.0732175	0.187402	0.095451	-0.185778	0.121283	-0.164461	-0.169849	-0.00452187	-0.205335	-0.0528485	-0.0215019	-0.496358	0.0640413	-0.383525	0.0552412	-0.10626	-0.0622726	-0.00916385
B3GALT6	-0.456916	0.288584	0.189189	0.18563	0.221532	0.12659	0.706189	0.0712644	0.123159	-0.0277425	0.224076	-0.00660977	-0.238722	-0.340008	-0.0423247	-0.0127972	0.107811	0.212274	-0.541542	-0.0105367	-0.0188155	0.157112	0.211258	0.306102	0.602521
SNX21	-0.602396	0.132689	0.135145	0.0884692	0.338505	0.139979	0.122926	-0.239765	-0.0307354	0.256313	0.369162	0.101561	-0.0859208	-0.173039	0.198895	0.226348	0.259234	0.0277267	-0.0459011	0.275839	0.22329	0.297401	0.233191	0.279393	0.633868
RHOB	-0.0418486	0.0158907	-0.00459514	-0.0188274	-0.00637599	-0.0421084	-0.600868	-0.0530681	-0.0544824	-0.0031816	-0.0664041	-0.0693087	0.103295	0.145825	0.0850936	0.116692	0.101171	0.117599	0.550237	-0.00740896	0.0451521	0.0114206	0.00684233	0.0293712	-0.0649797
ADAT3	-0.166511	0.0342422	-0.00974969	0.0265391	0.0397774	0.0619851	-0.300397	0.737687	0.0904234	0.0722177	-0.0296919	-0.0380465	0.133491	0.16725	0.0725433	0.0820918	0.0974227	0.0786284	0.406308	0.0226214	0.0639489	0.0636346	0.0512281	0.0321898	0.180435
CEL	-0.203009	-0.0474007	-0.0587467	-0.0271911	-0.0772579	0.00224059	0.0988679	-0.00883845	0.309677	0.248037	0.0221168	0.029615	-0.101982	-0.103638	0.435406	-0.0557475	-0.0721933	-0.0853542	-0.063627	-0.0756338	0.376145	0.296958	-0.0660972	-0.0513105	0.240835
GATS	-0.162799	-0.13096	-0.116096	0.0363538	0.347431	0.0772015	0.0632163	-0.00287826	0.128684	0.480525	-0.0129006	0.168182	-0.171989	-0.195979	0.161857	-0.14296	-0.123643	-0.11802	-0.188498	-0.149711	-0.0613315	-0.0251759	-0.125762	-0.0971154	0.124106
CBS	-0.146441	-0.0307002	0.008567	-0.0093684	-0.0862605	-0.120643	0.189898	0.138387	0.113811	0.271456	0.19515	-0.0960467	-0.112981	-0.0613643	0.0833444	0.0329175	0.273548	-0.0526214	-0.042094	0.232868	0.255295	0.0702102	-0.0115929	0.530006	0.267761
SPINK6	-0.00500376	-0.0640764	-0.0189426	0.00804695	-0.0269862	-0.0306129	-0.436397	-0.0604054	-0.0518393	-0.00264658	-0.0788839	-0.0333839	0.105565	0.31097	-0.00648861	-0.0194967	-0.00270964	-0.0280845	0.328894	-0.0529904	-0.0386159	-0.0501676	-0.0165874	-0.0797857	-0.157808
C22orf39	0.201903	-0.124754	-0.162362	-0.153632	-0.0730856	0.118402	-0.693211	0.0208495	-0.0481367	-0.0272443	-0.130784	0.115258	0.0346749	0.13384	-0.0312105	0.0670396	-0.00496673	0.0566182	0.520417	-0.113695	-0.142824	-0.109482	-0.326952	-0.0445542	-0.288899
DPCD	0.190779	0.0833999	-0.0905327	-0.0313479	-0.325007	-0.135418	0.162604	0.0684768	-0.0739096	-0.0987709	0.0297065	-0.154826	-0.0435796	0.00320576	-0.177063	-0.00746876	0.0651707	-0.646896	-0.210275	0.100244	0.191066	0.0909843	-0.0615051	-0.274085	-0.129382
CYP39A1	0.361782	0.0908286	-0.0154831	-0.149683	-0.363806	-0.345085	-0.116145	-0.108351	0.0180788	0.244693	-0.198999	-0.117972	-0.250342	-0.112803	-0.137124	-0.265745	0.00239142	-0.338314	-0.0767687	-0.305398	-0.0984587	0.141568	-0.207111	-0.219526	-0.321458
MEF2BNB	-0.385927	0.274617	0.0763436	-0.0733726	0.182367	0.323173	0.171981	0.22944	0.202779	-0.174157	0.153113	-0.00567096	-0.13832	-0.27831	0.0201522	0.0520439	0.221612	0.227578	-0.0391339	0.258124	0.0427466	0.38095	-0.281357	0.196549	0.490377
ZNF121	-0.279733	0.11413	0.0290456	-0.00343137	0.34405	0.271437	0.582912	0.38442	0.00971828	-0.00354866	0.0642852	-0.120331	-0.337789	-0.405859	-0.180922	-0.0185845	-0.0141852	0.0797806	-0.484645	-0.0996688	-0.124653	0.343536	0.111293	0.195391	0.482224
RAB7B	0.0376383	-0.303863	0.0209998	0.0435015	-0.00483306	0.0232343	-0.490065	-0.19676	-0.0465302	-0.00127579	0.104546	0.114078	-0.144007	0.0660534	-0.0334873	0.0185148	-0.114091	0.0160583	0.246414	0.0938606	0.0617683	-0.297383	0.0266455	-0.292448	-0.146373
DTYMK	-0.563628	0.373897	-0.04737	0.335266	0.139057	0.127967	0.581048	0.3341	0.2275	-0.0917743	0.194825	-0.0906965	0.00908965	-0.275656	-0.125761	0.0170109	0.0310009	0.070451	-0.366162	0.255756	0.111304	0.373713	0.244971	0.223787	0.693389
MAPKAPK5-AS1	-0.16165	-0.0760578	0.00430105	-0.157901	-0.0978735	0.103394	-0.038256	0.432919	0.217884	0.154535	-0.0499672	-0.0202995	-0.177679	-0.310595	0.0212271	0.0424415	0.0566116	-0.149973	-0.0600494	-0.171584	-0.0220614	-0.10965	0.0537693	0.00356522	0.208115
BRICD5	-0.148324	0.0566094	0.00515881	0.00920482	0.122913	-0.00312954	0.0725603	0.00162902	0.0234132	-0.00837887	-0.0157561	-0.0471569	0.00781116	0.0222813	0.196136	0.057122	0.0713518	0.495975	0.180835	0.043907	0.0622062	0.788752	0.0325415	0.0538556	0.245862
NBR2	0.0293024	0.144798	0.275941	0.0977846	0.0350893	0.0371085	0.697856	-0.0294219	0.233564	0.0184951	-0.180863	-0.0363341	-0.151471	-0.267003	-0.0669182	-0.0258775	-0.0754507	0.086922	-0.570815	-0.251729	-0.0792791	-0.0370255	0.0717106	0.0241697	0.111914
NT5E	-0.092701	0.222634	0.15259	0.241966	0.0957471	-0.0149085	0.73421	-0.0223884	0.0851814	0.00035557	0.0227157	-0.106893	-0.0836432	-0.508695	-0.0217584	-0.181392	0.00751588	-0.0234225	-0.633685	0.0629174	-0.0191251	-0.15767	-0.0750377	0.0369459	0.203222
ASPHD1	-0.226885	0.251206	0.358311	0.180819	0.0309102	-0.0325093	0.132364	-0.13104	-0.101992	-0.0739684	0.180889	-0.0224134	-0.213574	-0.2209	0.202613	0.323946	0.210681	0.237594	-0.0653461	0.183472	-0.105529	-0.145307	-0.0173354	0.403602	0.339482
TRIM37	-0.547971	0.293194	0.192767	0.292661	0.0150391	0.108915	0.433991	0.658712	0.181807	-0.0695517	0.195597	0.168037	-0.190698	-0.245148	-0.0403802	0.137458	-0.112462	-0.0925776	-0.234659	-0.0204447	0.284733	0.36524	0.0817875	0.269833	0.699232
ARHGEF28	-0.441753	0.298409	0.355384	-0.00282079	0.0560766	0.104158	-0.257009	-0.051544	-0.164795	0.0370903	0.0763045	-0.0218848	0.197502	0.147583	0.232933	0.215572	0.436439	0.339721	0.434033	0.177023	-0.0256174	0.167762	0.0761352	0.0365422	0.270067
LLGL2	0.401329	-0.0539274	-0.00576697	-0.343678	-0.118245	-0.0176906	-0.437701	0.00288019	0.00170749	-0.0868461	-0.213049	-0.0113171	-0.0324357	0.111688	0.210585	0.18571	-0.0715316	-0.131958	0.282604	-0.427438	-0.22845	-0.20142	-0.159085	-0.165074	-0.38327
OSMR	-0.244712	0.187245	0.206721	0.0449643	0.0942859	-0.236407	0.359099	-0.185991	0.200269	-0.161449	0.323479	-0.232285	-0.154536	-0.230701	0.247016	0.0883079	0.452987	0.178779	-0.19449	0.314707	0.137024	0.0556453	0.236404	0.201949	0.409869
NDST1	-0.360386	0.218146	0.135758	0.207355	-0.0943069	-0.292227	0.291443	0.0254146	0.0724912	-0.0243281	0.383037	0.132957	-0.0653973	-0.170351	0.222175	0.166098	0.174641	-0.276734	-0.243193	0.0702898	0.15943	-0.109129	0.109496	-0.0447122	0.359487
RSPO2	0.29429	-0.0808388	-0.0963469	-0.12158	-0.0978914	-0.132315	-0.0432146	-0.106378	-0.117687	-0.0710921	-0.0716995	-0.0198834	-0.0422304	-0.0739993	-0.0889723	-0.0582357	-0.0759812	-0.0755808	-0.0610121	-0.0669037	-0.0358166	-0.0593389	-0.104114	-0.0905132	-0.261201
CHD2	-0.475355	0.108808	0.117456	0.125075	-0.0861043	-0.00361876	0.18488	-0.0644345	0.130258	-0.0483222	0.210466	0.10847	-0.183787	-0.153684	0.32494	0.247652	0.612246	0.147265	0.00848998	-0.0173758	0.254171	0.208134	0.338407	0.421349	0.565557
USB1	-0.470659	0.219341	0.189458	0.497606	0.123401	0.195206	0.448553	0.0670497	0.0709526	-0.0517918	0.197505	0.0444892	-0.0638448	-0.202715	-0.319388	-0.0334546	0.0304102	-0.157252	-0.372026	0.0574208	-0.0613308	0.0556325	0.0827951	0.191339	0.471154
GPNMB	-0.381829	-0.0692798	-0.0242954	0.0154923	-0.0513992	-0.156512	0.112224	0.163229	-0.0785041	0.286189	0.795735	0.290471	-0.187433	-0.124356	0.144925	0.177455	0.0340227	-0.0200045	-0.0818606	-0.0321134	0.235132	-0.0406121	0.329893	-0.00869713	0.433711
CEP57L1	0.0939487	0.30555	-0.222828	-0.266061	-0.154072	-0.23647	0.0309022	-0.161492	-0.104114	-0.120414	0.525319	-0.00215223	-0.115992	-0.245873	0.183976	-0.0574725	0.0727583	-0.0309808	0.0301712	-0.0750244	0.204163	0.222364	0.157471	-0.0587405	0.0350736
BICD1	-0.32641	0.186116	0.0730314	-0.106504	0.18443	0.135719	0.642432	0.0574304	0.0982049	-0.165462	0.290575	-0.0318522	-0.278405	-0.371109	0.175489	0.0858209	-0.0362981	0.085054	-0.460928	-0.0327237	0.151603	0.257054	0.376629	0.403567	0.525461
ZNF12	-0.618931	0.0607497	0.169409	0.13288	0.193029	0.202573	-0.288108	0.216254	0.251284	0.262557	0.0789573	0.159622	-0.123328	-0.107363	0.267952	0.134449	0.244755	0.0698185	0.285692	-0.185356	0.127748	0.134392	0.311863	0.112982	0.553193
MYO10	-0.196333	0.198928	0.159383	-0.109023	0.238694	-0.0290752	0.518922	0.0908215	0.322443	-0.21267	0.166267	-0.181267	-0.127088	-0.169007	0.0892629	-0.0152956	0.262401	0.127741	-0.375803	0.0574456	0.340327	-0.121353	0.0260736	-0.154577	0.336845
SLC4A4	0.0285555	0.125837	-0.103988	-0.136889	-0.129813	-0.00109123	-0.262765	-0.153801	-0.136637	-0.0946218	-0.168598	-0.162583	0.0152383	-0.0166637	-0.0907148	-0.0836039	-0.0957258	-0.0963134	0.172205	-0.112181	-0.0757695	-0.138168	0.314915	-0.118306	-0.213687
TTC37	0.464544	-0.163852	-0.147114	-0.195151	-0.110116	-0.0648982	-0.755098	-0.205964	-0.171195	-0.0401346	-0.198997	-0.100888	0.00339396	0.220683	-0.0449408	-0.0811514	-0.129605	-0.138114	0.463591	-0.140164	-0.132688	-0.204761	-0.185601	-0.187566	-0.556318
ARSB	-0.0283433	0.0335263	0.0076572	-0.00598399	0.0458597	-0.0648012	-0.390895	-0.0431957	-0.00295627	0.0424412	-0.0401283	0.0671598	0.0952066	0.246326	0.0732774	0.12044	0.0814978	0.116824	0.492686	0.121532	0.055802	0.052785	0.0251036	0.00133161	-0.0360604
FRMD4A	-0.00962673	0.112241	0.0651337	-0.0117778	0.0258525	-0.0135949	-0.64983	-0.0102489	0.0110291	0.046658	-0.00347257	0.0455225	0.216939	0.214447	0.166227	0.237066	0.212333	0.247637	0.834927	0.0854323	0.134211	0.131204	0.0526124	0.0789299	-0.0213422
ZBTB24	-0.634642	-0.00159586	-0.0141144	0.0443728	0.237165	0.269941	0.409935	0.364349	0.124852	0.194127	0.461706	0.0356922	-0.154213	-0.216697	-0.0926827	0.153546	0.330824	0.12891	-0.225844	0.126053	0.109931	0.307839	0.439109	0.274823	0.72307
LARP1B	-0.28278	-0.0205299	-0.0687227	-0.060439	0.659638	0.172056	0.216365	0.102953	-0.0480321	-0.0754185	-0.035423	-0.10915	-0.070252	-0.0644599	-0.0977276	-0.0378266	-0.0537791	0.0237656	-0.0921128	0.00455286	0.0950517	0.646412	0.113167	0.35645	0.354501
C14orf159	-0.116778	0.0413403	-0.0116418	-0.014421	-0.0135807	-0.0444427	-0.138993	-0.0462144	-0.0225757	0.272889	-0.13488	-0.193727	0.233767	0.15428	0.0370582	0.440237	0.310669	0.142693	0.315623	0.519307	-0.115037	-0.00987579	0.224127	0.00990254	0.0375995
TMEM239	-0.0568946	0.0355216	0.0525066	0.0381004	0.0457136	0.0345343	-0.738512	-0.00289402	0.0398089	0.107309	-0.00155948	0.00224381	0.286748	0.29644	0.181359	0.142632	0.415689	0.168592	0.80763	0.00494159	0.155587	0.0517921	0.0356157	0.0191623	0.00137355
MRAP	-0.0515743	0.136347	0.0570467	-0.0233462	-0.0802581	-0.0551386	-0.839112	-0.0462688	-0.00241721	0.137805	-0.0217029	0.0205614	0.310421	0.367547	0.218905	0.267813	0.264257	0.296157	0.950993	0.0830238	0.15423	0.139987	0.0784148	0.0790315	-0.0420117
ZNF24	-0.215906	0.0498468	0.220502	-0.00482938	-0.021254	-0.129397	0.187848	-0.0697971	0.0506123	-0.0684364	0.121257	-0.200479	-0.138371	-0.0571705	0.0124669	0.259626	-0.0324074	-0.129153	-0.04206	-0.186115	0.272492	0.25114	0.311243	0.602732	0.29173
TXNDC9	-0.379375	0.322382	-0.0547209	-0.125475	-0.0525608	-0.184865	-0.0713105	-0.0587385	0.040521	0.118542	0.39253	-0.109869	-0.117941	-0.0966063	0.175561	0.0693826	0.0429857	0.0696406	0.202665	0.0772647	0.543827	0.463238	0.227975	0.318757	0.445083
DCAF8	0.000648831	-0.216247	0.194164	0.0459683	-0.3296	-0.0901289	0.458466	-0.12112	0.279265	-0.0752496	-0.0232667	-0.220165	-0.225584	-0.155228	-0.0679224	-0.0441726	-0.280925	-0.245904	-0.38656	-0.00202251	0.329068	0.159469	0.310569	0.231557	0.0756931
SMPDL3B	-0.0266195	0.402927	-0.0802302	0.329657	-0.0472539	-0.120041	0.0656874	-0.160758	-0.0910796	-0.0856673	0.0615206	-0.148963	-0.067563	-0.167567	0.175034	0.0597999	0.188638	0.0996871	0.0584137	0.27184	-0.0443486	-0.108524	0.298791	0.315505	0.14063
CNOT1	0.333572	-0.0516777	-0.33702	0.269671	-0.31764	0.0609115	-0.203276	0.022308	-0.0864684	-0.29036	-0.218436	-0.167797	0.100488	0.110889	-0.191844	-0.248499	0.0851573	-0.31681	0.0152687	0.00382593	-0.309512	-0.298039	-0.0986079	-0.0801597	-0.421173
SPTLC1	0.186148	-0.280979	0.109087	-0.0144234	-0.133152	0.20191	-0.0943493	-0.246007	0.0289882	-0.156745	-0.356899	-0.230509	-0.0797409	0.115257	0.146372	-0.0468232	-0.145869	-0.279103	-0.0228724	-0.0201716	0.187324	0.0290058	-0.261044	-0.159388	-0.30053
ASH1L-AS1	-0.364232	0.064031	0.268477	0.0751557	0.174215	0.171994	0.793481	0.305653	0.204075	-0.0263329	0.145819	-0.0422241	-0.352574	-0.434984	-0.121263	-0.101365	-0.00266538	0.108755	-0.617674	0.0382177	0.150029	0.1627	0.233505	0.058659	0.520825
SETMAR	-0.00361667	0.0307012	0.0279999	-0.00398504	0.0664458	0.0267018	-0.555307	-0.0140467	0.00505172	0.0721991	0.00496777	-0.00264671	0.142094	0.181132	0.109833	0.0888392	0.107172	0.111229	0.536856	0.025675	0.0890724	0.0382672	0.0510747	0.0225939	-0.0500059
XG	-0.294386	0.411616	-0.0889491	0.397047	0.0722377	0.276205	0.0996147	-0.0424587	-0.0728667	-0.156787	0.0204113	-0.110125	-0.0826206	0.0307015	-0.146508	-0.150936	-0.115761	-0.0406457	-0.105482	-0.114837	0.288729	0.45484	-0.0795664	-0.0580057	0.299327
ZHX1-C8orf76	-0.533359	0.175481	0.0975064	-0.0100296	0.0867519	0.0888428	0.631723	0.160848	0.3126	0.0922872	0.257832	-0.0295081	-0.184475	-0.230623	0.169707	0.242804	0.344739	0.157916	-0.354242	0.133927	0.24218	0.141648	0.324312	0.345055	0.670541
MVB12B	0.394297	0.0242832	0.0245817	-0.000136577	0.0106074	-0.114535	-0.544503	-0.14105	-0.118197	-0.0352455	-0.14187	-0.0693782	0.193824	0.237622	0.0358917	0.173226	0.123831	0.161378	0.601106	0.00493064	0.0231335	0.0107646	-0.0312389	0.016592	-0.296898
C12orf66	-0.534749	-0.0173779	0.10954	0.0613239	0.504314	0.144343	0.279177	0.391992	-0.0872487	0.255491	0.215854	0.177222	-0.216382	-0.274683	-0.126881	-0.226972	-0.156962	0.0859322	-0.218406	0.147003	0.151697	0.378836	0.241012	0.34548	0.593219
EPHA8	-0.0384327	-0.0365904	-0.0390059	-0.0477016	-0.00804596	-0.0449701	-0.561221	-0.0921449	-0.0667259	-0.00680338	-0.0544138	-0.0248941	0.0246338	0.0943013	0.0173184	-0.00287683	0.0163346	0.0130729	0.38606	-0.051185	0.0225072	-0.0483709	-0.0203822	-0.0462038	-0.0959839
CCDC67	0.00557333	0.0496618	0.0459195	-0.0319362	0.0195336	-0.0160021	-0.873464	-0.0469436	-0.000466478	0.0613687	-0.0393253	0.0683625	0.163249	0.241105	0.127421	0.151048	0.142114	0.168509	0.852124	0.0519566	0.13885	0.0294735	0.050941	0.0405512	-0.0887763
TMEM136	-0.202783	-0.00110674	-0.00948115	-0.00993048	-0.0749345	-0.0699441	0.142973	-0.0146197	-0.0473393	-0.028059	0.0200028	-0.0982966	-0.0759521	-0.0714704	-0.0371681	0.016952	-0.0290225	0.00537394	-0.0466833	0.197215	0.0874872	0.00192574	0.51715	0.882874	0.249669
TMEM53	0.580851	-0.0481886	0.185003	-0.0950298	-0.370628	-0.209055	0.45088	-0.173952	0.0184161	-0.0457417	-0.24678	-0.277874	-0.0363852	-0.205525	-0.0703077	-0.310528	-0.208107	-0.300436	-0.500328	-0.18601	-0.255261	-0.0931901	-0.302255	-0.093869	-0.473711
DNAJA3	-0.461804	0.352556	-0.113206	0.116635	-0.0943361	0.0144844	0.172425	0.250388	0.130838	-0.0316067	0.228669	-0.129343	-0.134233	-0.0839131	0.261319	0.460256	0.111646	0.413843	0.0561083	-0.0238874	0.213673	0.409312	0.198753	0.146017	0.581874
GALNT18	-0.270526	-0.0681803	-0.132795	0.385807	0.0192152	0.113096	0.181234	0.494787	-0.10974	-0.0867582	0.139935	0.262257	-0.158303	0.0270649	-0.0616585	-0.0156558	-0.179439	-0.0202573	-0.192495	0.422222	0.131844	-0.0376762	-0.0224263	-0.0869198	0.292479
NOL9	-0.277082	-0.0419129	0.111719	0.375119	-0.116338	0.308408	0.201724	0.0191237	-0.0894108	-0.254368	0.47802	-0.114733	-0.354915	-0.305637	-0.178575	0.0557557	0.056665	-0.253787	-0.277611	-0.0206175	-0.0129408	0.0664591	0.107984	0.0631913	0.336625
DDX51	-0.504762	0.000276844	0.0255024	0.0987287	0.078063	0.372136	0.667159	0.533971	0.311193	-0.137607	0.284239	0.183284	-0.146384	-0.240561	-0.226287	0.0270708	-0.0931962	-0.0713776	-0.519663	0.08596	0.120459	0.10599	0.15216	0.0731501	0.57366
TUBGCP3	-0.222336	-0.0203123	0.0338523	-0.0238522	-0.085701	-0.0262588	0.231364	0.0465012	0.718633	-0.0965382	0.48676	0.0287453	-0.110174	-0.157169	-0.078763	-0.058959	0.206602	-0.0726179	-0.204174	-0.0875931	-0.0241134	-0.0102528	-0.0159546	-0.0415784	0.295654
SNAPC5	-0.169508	0.247365	-0.109814	0.0633967	0.107159	0.0515112	0.511927	0.0934131	0.102954	-0.174645	0.0827199	0.0687206	-0.241028	-0.240453	0.0488579	0.0900802	-0.410533	0.0876333	-0.389579	0.0735422	0.120564	0.229077	0.0647463	0.445452	0.365452
ENTPD5	0.583712	-0.106873	-0.120449	-0.165978	-0.122907	0.0294244	-0.067746	-0.175629	-0.163686	-0.0769276	-0.229296	-0.131316	0.0938766	-0.0443612	-0.0636139	-0.0592426	-0.0694118	-0.0380429	0.112446	0.0488014	-0.129585	-0.122348	-0.125007	-0.0549412	-0.520191
RBM33	-0.433255	0.25544	-0.159184	0.0178973	-0.0176843	-0.0360393	0.473358	0.0599621	0.306973	-0.0689711	0.336897	0.041225	-0.209501	-0.222528	0.0479581	0.377534	0.382599	0.121192	-0.218157	0.0300863	0.418556	0.0860779	0.284367	0.248824	0.583502
MIR31HG	-0.00510742	-0.103224	0.64342	0.438979	-0.201852	0.0408647	0.113126	-0.14675	-0.0979936	-0.109208	-0.203009	-0.0850954	-0.0567035	0.125788	-0.135125	-0.237977	-0.070149	0.11232	-0.156534	-0.0878116	-0.185846	-0.152101	-0.0729612	-0.0931286	-0.11702
SPIN3	-0.0839014	0.667049	0.00367311	-0.12523	-0.0628532	-0.229481	-0.253532	-0.0977276	0.351488	-0.00227909	0.00557303	-0.00371097	0.0454988	-0.0452996	0.07867	0.134036	0.101265	0.241446	0.460757	0.037624	0.153918	0.326107	0.0529338	0.234681	0.203001
TMTC4	-0.0344265	-0.0991562	0.304443	0.0247793	-0.141279	-0.125157	0.0326601	0.158622	0.458971	0.0458847	0.0723041	-0.0851987	-0.162759	-0.168274	0.207156	0.11655	-0.117068	-0.138042	0.0149161	-0.118763	0.259811	0.193103	-0.0894015	0.165684	0.179923
TMEM185A	-0.225994	0.093419	0.181992	0.164176	0.0531233	-0.0277763	0.599462	0.205027	0.173665	-0.265897	-0.00436205	-0.1108	-0.250703	-0.200776	0.0265213	0.188845	0.208797	-0.0852405	-0.433291	-0.0367528	0.186949	0.156344	0.296266	0.296929	0.426425
NBEAL1	-0.153329	0.0217668	0.104713	0.0287265	0.16504	0.21482	-0.745364	-0.174795	-0.0566585	-0.00499491	-0.0242102	-0.183107	0.0524557	0.0488668	0.0268417	-0.0602407	-0.0579159	0.0656831	0.51608	-0.0376892	-0.0273964	-0.0491211	0.138078	-0.105798	-0.0128923
CDCP1	-0.294839	0.0518687	-0.0170209	0.0222043	0.400962	-0.0128541	0.0851105	0.0765575	-0.0547466	-0.00955981	0.357894	-0.14601	-0.0252435	-0.0521059	-0.146031	0.111468	0.0738671	0.704828	0.0470582	0.000976642	0.0653177	0.206523	0.354336	0.123855	0.377402
ULK2	-0.115501	0.115621	0.0994863	-0.186212	0.0959005	0.000911167	-0.738361	0.0335461	0.047971	0.114528	0.0387925	0.0219967	0.204681	0.119931	0.18841	0.214724	0.179017	0.219591	0.831105	0.0730692	0.18918	0.101047	0.0928339	0.23001	0.0662187
SLC4A8	-0.0739413	-0.0147613	-0.0117124	-0.0186567	-0.0638864	-0.0493987	0.0384452	-0.02928	-0.0407758	-0.0446637	-0.0615185	-0.0493064	0.0551391	-0.0278452	-0.0304132	0.0155829	-0.0111097	0.0120588	-0.0037093	0.979292	0.00456688	0.0239017	-0.0387634	0.0371325	0.0377755
SSH2	-0.0671834	0.0498298	0.0111202	-0.124951	-0.0221595	-0.16082	-0.651623	-0.0522397	-0.0346486	0.0817752	-0.0892957	-0.0708049	0.164134	0.171256	0.135179	0.202624	0.144503	0.193554	0.684357	0.0325843	0.085968	0.0337694	0.45596	0.0988054	-0.013558
C5orf58	-0.193531	-0.00456721	-0.00499764	-0.00154993	-0.0356068	-0.0593398	-0.252546	-0.0152771	-0.0567475	0.00772626	0.563743	0.641315	0.0171136	0.0265981	0.00889681	0.0498921	0.045477	0.0644345	0.241951	-0.0219131	0.0478442	0.0190346	-0.0296443	-0.0027311	0.17055
PARP11	-0.152694	-0.0651104	-0.0225394	0.27592	-0.0320221	-0.0185137	-0.133113	0.0171147	0.802914	-0.0497294	-0.0859786	-0.0565314	-0.0122188	0.152151	-0.0666516	-0.0515511	-0.0610246	-0.0614907	0.102199	-0.102879	-0.029352	-0.0519759	0.0915272	-0.098996	0.104896
CCDC60	0.00367752	0.0138389	-0.0371274	-0.167201	0.00937814	-0.0866412	-0.670606	-0.0580935	-0.112916	0.0899556	-0.135115	-0.0657763	0.281611	0.285361	0.121998	0.192781	0.247881	0.231986	0.753249	0.322972	0.0565109	0.130173	0.210354	0.0407004	-0.119418
HSD17B12	0.00626497	0.160315	0.100146	-0.0609633	-0.0453555	-0.0891565	-0.788063	-0.0232331	0.0194261	0.0476029	-0.0503468	0.00954974	0.3208	0.279965	0.208033	0.320482	0.293685	0.349119	0.975405	0.114917	0.166642	0.159278	0.0301647	0.111736	-0.0428803
NLGN4Y	0.00416355	0.062142	0.0590778	0.0354083	0.00140563	-0.0194571	-0.911242	-0.0531729	-0.0444612	0.0936448	-0.0351484	0.0224324	0.187589	0.2581	0.170749	0.144411	0.152574	0.1588	0.887751	0.0518788	0.123578	0.0361845	0.0799141	0.0466699	-0.089002
MSRB3	0.488862	-0.158086	-0.167134	-0.153459	-0.170889	0.117299	0.0645895	0.024759	-0.100206	-0.151624	-0.205555	-0.118054	-0.0747233	-0.154522	-0.131375	-0.118093	-0.177697	-0.215628	-0.184817	-0.123413	-0.125474	-0.167239	-0.0440762	-0.158823	-0.347091
ADIG	-0.00335593	-0.0596752	-0.0550362	0.0206661	-0.0675568	-0.080611	0.14615	0.0664158	-0.0938177	-0.06141	-0.0911157	-0.0493679	0.245389	0.241643	-0.0673791	-0.0246494	-0.0514978	0.013447	-0.0581724	0.262131	-0.104479	-0.0313314	-0.0240877	-0.0484972	-0.157712
CCSER2	-0.125182	0.0534309	-0.00417674	-0.0399799	-0.03067	-0.0578219	-0.741308	0.182034	0.00270915	0.00903989	0.0916153	0.0275148	0.119559	0.173557	0.336617	0.128117	0.58436	0.135408	0.754554	0.0340184	0.129016	0.0113478	0.0376561	0.0113099	0.0816352
RUFY2	-0.0036556	0.0180716	0.00541924	-0.0590351	0.00967115	-0.0421777	-0.955972	-0.061321	-0.0258915	0.0491259	-0.0674679	0.0414096	0.166613	0.252615	0.101798	0.111712	0.112063	0.12201	0.860574	0.0137666	0.108058	-7.39725e-05	0.0250217	0.0306028	-0.119737
WDR78	-0.347188	0.376727	-0.0116093	0.191293	-0.0594801	-0.0775873	0.273632	-0.0380189	0.00829409	0.14554	0.0457165	-0.106951	-0.110214	-0.102796	0.0281527	0.241765	0.340711	0.434685	0.0213749	-0.00613422	0.51435	0.303265	0.382542	0.359784	0.520298
SUGT1P3	0.00123014	0.0338286	0.0282825	-0.0535767	-0.0168798	-0.0482412	-0.949115	-0.0854902	-0.0275851	0.068139	-0.0674665	0.0356488	0.175524	0.236407	0.143072	0.122152	0.127486	0.134638	0.878546	0.0260394	0.124119	0.00856644	0.0411938	0.029556	-0.120295
MAATS1	-0.107077	0.034971	0.814651	0.140009	0.0197203	-0.00019511	-0.341184	-0.0459421	-0.00844272	0.0119559	-0.0498526	-0.0389996	0.0201538	0.0390422	0.0267056	0.0131928	0.1495	0.0469134	0.335286	-0.0223961	0.000647355	-0.0249186	-0.00543418	-0.028483	0.0613949
SLC33A1	0.537027	-0.365504	0.0302612	-0.236912	-0.183031	-0.0806171	-0.3275	-0.363119	-0.24514	-0.231187	-0.343805	-0.0592684	-0.0842938	0.126705	-0.184719	-0.306954	-0.316964	-0.445983	0.00598916	-0.0383659	-0.0786821	-0.286333	-0.0519293	-0.0693569	-0.663178
CLDND1	0.460736	-0.12233	-0.180083	-0.166553	-0.267866	-0.388554	0.120006	-0.149483	-0.0953524	-0.133711	-0.0890862	0.109806	0.0947209	0.136138	0.0671655	0.199587	0.0309846	-0.103288	-0.107115	-0.347376	0.00781607	-0.0569192	-0.0915885	-0.00890224	-0.341359
OGDH	0.264689	-0.0754189	-0.113255	-0.146754	-0.172866	-0.160798	0.139819	0.10794	-0.0786185	0.233358	-0.0971001	-0.0715567	-0.048572	-0.139195	0.125346	0.00793389	-0.0871999	-0.0238516	-0.104346	-0.0797453	-0.0926374	-0.0748809	0.244117	0.325318	-0.0815341
PHF21A	-0.472058	0.0732323	0.0658391	0.0765801	0.33143	0.59649	0.096864	0.159295	0.0640208	0.0465303	-0.00101066	0.0753662	-0.0813024	-0.113702	0.0217795	-0.307438	0.0274201	0.0666143	-0.142535	-0.0335232	-0.0132944	0.00118881	0.0350663	0.0403045	0.363081
GDAP2	0.197066	-0.0796292	-0.0884991	-0.103815	0.00688355	-0.0812376	-0.842041	-0.184598	-0.136691	-0.016789	-0.135106	-0.102509	0.00429136	0.233518	-0.0166042	-0.0579795	-0.0460685	-0.0709917	0.55122	-0.118577	-0.0314885	-0.196982	-0.0281392	-0.13844	-0.343693
MCPH1	-0.140655	-0.118361	-0.0739296	-0.158441	0.319688	0.107877	-0.085675	-0.0587913	-0.176252	-0.150689	0.142428	-0.160385	-0.0587757	0.000483438	-0.120159	0.503346	0.0327117	-0.177992	0.153063	-0.077213	-0.0653035	0.321697	0.0238388	0.273603	0.0990041
WFDC8	-0.0210394	0.12546	0.0922109	-0.0340134	0.0194093	-0.00403248	-0.763545	-0.00495089	0.025204	0.0612301	-0.0204584	0.0140802	0.274464	0.278702	0.190625	0.266359	0.260101	0.333741	0.93537	0.0872045	0.140801	0.115434	0.0390965	0.0878187	-0.0290233
ZMYND11	-0.283469	0.264629	-0.0569229	0.00228407	-0.103023	0.161188	-0.0850183	-0.00885409	-0.0362659	0.0494142	0.567385	-0.0486902	-0.0307234	-0.0124912	0.0119823	0.0361469	0.0370299	0.264008	0.241412	0.00385101	0.599138	0.360982	0.0247077	0.117559	0.367464
ZNF446	-0.428554	-0.0282963	-0.0321499	0.445368	0.103079	0.258999	0.505325	0.392434	0.422696	-0.037874	0.177483	0.00272968	-0.177453	-0.284533	-0.157833	-0.130989	-0.113409	0.027327	-0.475006	0.130049	-0.0374353	-0.0205162	0.213751	0.0431698	0.494758
TWIST2	-0.0958097	0.0604632	0.0208319	-0.136675	-0.0845211	-0.194505	-0.342727	-0.037542	0.0319632	0.028915	0.070762	0.0453125	0.0988396	0.12858	0.130713	0.129122	0.115906	0.165525	0.480779	0.0373613	0.885172	0.151235	0.0112315	0.0636177	0.125634
FAM53B	0.0228338	0.116406	0.0864503	-0.0920722	0.00676016	-0.080915	-0.876454	-0.0396106	-0.0172244	0.0853433	-0.0792735	0.00829397	0.289305	0.317126	0.175228	0.251447	0.241393	0.294577	0.98488	0.1014	0.146665	0.113863	0.0704638	0.0896012	-0.0900986
GOLGA7	0.206563	-0.135479	0.00952514	-0.0422044	-0.295136	-0.0957644	-0.708326	-0.129677	-0.172638	0.0192049	-0.0919327	0.0469316	-0.0575934	0.0666633	-0.0150716	0.0476177	-0.182946	-0.143574	0.450425	-0.170596	0.101255	-0.243541	0.112456	0.0770229	-0.266003
SH3KBP1	0.140806	0.232335	0.0827021	-0.0139434	-0.17104	-0.16965	0.520831	-0.469287	0.192737	-0.0936464	0.0793289	0.117551	-0.0848549	-0.288732	-0.0199489	-0.0470405	-0.0502034	-0.0838631	-0.446694	0.0779681	0.11712	-0.277498	0.062795	-0.0322295	-0.0297893
MBLAC1	-0.11966	0.226141	0.038679	0.00298214	0.374993	0.0429404	0.178441	0.0788146	0.211541	-0.00636784	-0.426781	-0.449028	0.368754	-0.0527914	-0.0927355	0.0649923	0.0822536	0.10358	0.0268382	-0.0872372	0.0658146	0.354451	0.0525899	0.02385	0.109988
ZMYM3	-0.35445	0.247139	0.0681535	0.0809587	0.165498	0.14609	0.566574	0.180638	0.244921	-0.108827	0.384915	0.121641	-0.065714	-0.270691	0.0693116	-0.0303853	0.364235	0.0570302	-0.279074	0.192525	0.199898	0.130356	-0.0163448	0.248614	0.51038
CD300LB	-0.102619	-0.00751784	-0.00325246	-0.0676611	0.00543503	-0.0397345	-0.0342981	-0.0514496	-0.0269346	0.23399	-0.0585775	-0.0352107	0.623421	0.0955767	0.0141779	0.0283318	0.0311001	0.0781878	0.200362	0.450408	-0.0486661	0.0151599	-0.0366074	-0.00911482	-0.0711172
C3orf33	-0.30187	0.011827	-0.079112	-0.11572	0.379901	0.471424	-0.114796	0.0245896	-0.0190218	-0.133935	-0.000569162	-0.113054	0.000658907	-0.045888	-0.0639394	0.0528444	0.0193078	0.107768	0.216291	0.0678432	0.21488	0.710859	0.254242	0.144444	0.328511
ATP5S	-0.0586881	-0.436605	-0.0703791	-0.174613	0.0365158	-0.143468	-0.242153	0.0253736	-0.0899122	-0.135702	0.0763488	0.0843783	0.0799952	0.0462585	0.0892233	0.037753	0.0754515	-0.0935511	0.296084	0.0600348	0.71333	0.108084	0.173884	0.0527869	-0.00713505
FAM126B	0.452615	0.0433691	-0.222572	-0.29156	0.13212	-0.0638769	-0.229939	-0.336626	-0.255226	-0.135827	-0.067696	-0.125252	0.105198	0.163997	0.0706858	-0.0273485	0.0376481	-0.142651	0.0792287	-0.119149	-0.103821	-0.557869	-0.348028	-0.229711	-0.565764
LYNX1	-0.044126	-0.0993737	0.29698	0.151421	-0.0750253	-0.0533719	-0.390894	-0.109902	-0.0897084	-0.0503416	-0.148594	-0.0828777	0.194481	0.391475	-0.0673332	-0.0907766	-0.0614876	-0.085111	0.205261	-0.126008	-0.119656	-0.104329	-0.0517704	-0.133453	-0.15472
SNX32	-0.0853236	0.092271	0.0914907	0.0373574	0.0892323	-0.0144873	-0.832929	-0.00889795	0.00601871	0.0797112	0.0277211	0.00835772	0.258134	0.31817	0.199612	0.231595	0.196147	0.260695	0.890366	0.0698053	0.130236	0.0880981	0.0669177	0.0745519	-0.0029671
LOC554206	-0.109692	0.0155368	0.777016	0.0834883	-0.0175359	0.0176748	-0.106497	0.0210856	-0.0101715	0.00631046	-0.00375542	0.515469	-0.0142312	-0.0366481	-0.0584009	-0.016938	0.0149233	-0.00973354	0.159188	-0.043601	-0.0282742	-0.0312263	-0.00913948	-0.0336573	0.103752
C11orf53	0.107802	-0.028865	-0.0170847	-0.0706071	-0.109589	-0.142314	0.160426	0.20893	0.186629	0.0192627	-0.0725013	0.103742	-0.00364947	-0.0637855	-0.0605409	0.00534127	-0.0218712	0.191958	0.00872265	-0.119226	-0.0455927	-0.02111	-0.0649096	0.697894	0.0295936
PLEKHS1	-0.049723	-0.181342	-0.212714	-0.0896654	0.0367673	0.469008	0.250986	-0.0786115	-0.190143	-0.203082	0.206967	0.117438	-0.087727	-0.274702	-0.237782	-0.135513	-0.0254152	-0.189801	-0.281839	0.198166	0.25541	0.179854	0.0404214	-0.109623	0.0837912
TRMT44	-0.379778	0.0384614	0.0370773	0.0273036	-0.064235	-0.0431579	0.0599579	0.0279154	-0.06134	0.352038	0.0454303	-0.0504223	-0.0265859	0.00548875	0.019655	0.246873	0.0167227	0.0517506	0.0453113	0.0532584	0.015078	0.00700123	0.336614	0.802223	0.331563
MANEA	-0.0264177	0.0751177	-0.0316138	-0.0680588	-0.0639962	-0.0655058	-0.65914	-0.112417	-0.0616593	-0.0153454	-0.0683183	-0.058216	0.0037158	0.0745817	0.00245577	-0.0197415	-0.00702303	-0.0368761	0.441373	-0.0765409	0.00328903	-0.0880902	-0.0313326	-0.0790463	-0.112796
C5orf46	-0.0813618	0.0365229	0.511798	0.117898	0.0436549	0.0554339	-0.356394	0.0205324	0.0423048	0.069116	-0.0106802	-0.0158439	0.0946481	0.252916	0.0828786	0.0548752	0.0920191	0.0631391	0.427946	-0.000126344	0.0241122	0.0817603	0.0582837	0.00291371	0.0596128
IZUMO1	-0.0108374	0.0945523	0.0446409	-0.0754547	-0.0337095	-0.0805776	-0.803211	-0.0716272	-0.0226611	0.028674	-0.0531678	0.060304	0.234186	0.234972	0.145119	0.212992	0.199621	0.25263	0.88429	0.0641381	0.131824	0.0824856	0.0739191	0.0554385	-0.0729399
SH3YL1	-0.209461	0.034124	-0.0209048	-0.00495757	-0.0656144	-0.0687839	0.017435	-0.0117872	-0.0205208	-0.0249553	0.810153	0.119624	-0.016027	-0.0345344	0.0181262	0.0529498	0.549349	0.0849085	0.0790546	0.00812752	0.05304	0.0467067	-0.0104987	0.020011	0.260803
PTPRO	-0.116081	0.0174526	-0.0264135	0.00626951	0.0208706	-0.0280681	0.0523634	0.0263836	0.0188165	-0.019368	-0.0224879	-0.0553707	-0.0036001	0.0114182	0.00325981	0.0224056	0.00484342	0.0381512	0.0772212	0.0269244	0.0836282	0.977713	0.0242929	0.0409823	0.211642
GRIK1-AS1	-0.0129834	0.102086	0.0369171	-0.105689	-0.0305986	0.0385064	-0.499193	-0.0208172	-0.00631365	0.0766991	0.0206077	0.0138262	0.142532	0.246613	0.173072	0.165224	0.181221	0.612591	0.652845	0.0783559	0.122921	0.0657396	-0.00509538	0.0791128	-0.000650157
ICA1L	-0.094397	0.0185283	0.0809481	-0.0389129	0.140871	0.000853176	-0.863393	0.0519689	0.0804341	0.182667	-0.0401975	0.0512344	0.25666	0.344616	0.114685	0.136024	0.0958639	0.154909	0.838035	-0.00325214	0.0345169	0.0223997	0.0862834	0.0486855	-0.0432061
TMLHE	0.175557	0.0423051	-0.232129	-0.0241708	0.181383	-0.214173	0.145261	0.160798	-0.0132676	-0.0386577	-0.169757	-0.204653	0.00606722	-0.0574178	0.0770385	-0.14479	0.465295	-0.143728	-0.0401227	-0.206373	-0.129616	0.199476	-0.145057	0.176517	-0.0868725
MEI1	0.31925	-0.0985125	-0.0945487	-0.111554	-0.151194	-0.132396	0.105483	-0.101911	-0.124245	-0.0863007	-0.0831547	0.334228	-0.0584757	-0.0177185	-0.10114	-0.0725056	-0.115213	-0.110649	-0.151266	0.330002	-0.112836	-0.104452	-0.115908	-0.0981848	-0.288835
ZCCHC13	-0.0404898	0.161146	0.0823785	0.00417612	-0.0117484	-0.044398	-0.799208	-0.0440832	-0.0121217	0.02608	-0.0287286	0.00696159	0.324091	0.345321	0.256352	0.317065	0.312203	0.375378	0.974152	0.112512	0.16099	0.154883	0.0221832	0.113619	-0.0187602
KCNS2	0.0361884	-0.0501569	-0.0634221	-0.105195	-0.105114	-0.144338	-0.211091	-0.115555	-0.125116	0.0183045	-0.17188	-0.0191758	0.135442	0.87873	-0.0378297	0.0470362	0.0160637	0.0462373	0.185895	0.0110016	-0.0981655	-0.0301245	-0.0451188	0.0956573	-0.24999
ARHGEF10	0.388628	-0.14934	-0.16202	-0.0493	-0.145032	-0.143646	0.0812094	-0.164144	-0.173258	-0.105996	-0.13899	-0.0915086	-0.0917011	-0.128218	-0.164268	-0.131727	-0.14874	-0.148288	-0.221513	-0.128562	-0.0961434	-0.10335	-0.152214	-0.145869	-0.372579
CCDC132	-0.0835045	0.0170639	0.00238538	-0.0255128	-0.0401609	-0.0641991	-0.222441	-0.0437668	0.0364972	-0.0181018	0.0548483	0.109404	-0.017052	0.0292685	0.950428	0.0669631	0.0569481	0.0668883	0.231607	-0.00375322	0.0108626	0.0109259	0.00369676	-0.00590639	0.0775889
BC027448	-0.0216828	-0.0127492	-0.00179627	-0.0798027	0.0102808	-0.033113	-0.441745	-0.0628116	-0.0512946	0.0970544	-0.059378	-0.0326513	0.169474	0.364777	0.0779312	0.0744602	0.0556708	0.0778846	0.45024	0.0415685	-0.0296233	-0.026264	0.0440847	0.322592	-0.103135
MGC45922	-0.140763	0.149141	0.0358103	0.0191728	0.042414	-0.0420259	-0.11199	-0.0186495	-0.0555743	0.0697683	0.0417705	-0.0397969	0.0431951	0.0792957	0.129788	0.649789	0.14249	0.715742	0.338267	0.0606748	0.0574535	0.0322407	0.0613068	0.250968	0.22815
LOC101929497	0.0572473	0.00879053	-0.0236925	-0.0846766	-0.0245346	-0.0896797	-0.487536	-0.0908282	-0.0528283	0.0378132	-0.0950488	-0.047514	0.414809	0.525487	0.0970688	0.509919	0.122858	0.149734	0.655427	0.0807714	0.00737036	0.0190686	0.0103552	0.0058929	-0.207816
BAALCOS	-0.102843	0.751822	0.0542268	-0.0300458	-0.0604096	-0.0612269	-0.292229	-0.0600168	-0.0191654	-0.0462706	-0.0476062	-0.0498283	0.0817935	0.0668886	0.0677278	0.103553	0.149993	0.138727	0.371473	0.0187278	0.0526017	0.0292041	0.0213757	0.0318644	0.106629
CREBRF	0.104894	-0.0140546	-0.0264184	-0.291174	-0.0397867	-0.110957	-0.359865	-0.080172	-0.0405688	0.0496952	-0.0193669	0.0503807	0.0563117	0.0734917	0.447435	0.196312	0.0631343	0.238648	0.374201	-0.0095968	-0.0142159	-0.0444572	-0.0271543	-0.03869	-0.126868
KATNAL2	-0.105937	0.0381232	0.969701	0.0926864	-0.0670489	-0.00564398	-0.035686	-0.0257443	-0.0092946	-0.0453516	-0.083583	-0.0560858	-0.00240283	-0.0314157	-0.00101988	0.00412017	0.00850768	0.0130937	0.0920037	-0.0274577	-0.0321024	-0.0264788	0.143507	-0.0170193	0.0911301
CTNNA3	-0.0666939	0.117437	0.0938992	-0.0747917	0.0397102	-0.0126189	-0.775981	0.00845479	0.0699544	0.102336	-0.0707723	-0.00198516	0.254564	0.323289	0.231421	0.270679	0.239524	0.295306	0.931946	0.110576	0.14588	0.119453	0.0884986	0.160276	0.000463926
ZADH2	0.295762	-0.101188	0.267248	-0.430031	-0.0459895	-0.306355	0.0592715	-0.325681	0.158043	-0.0876089	-0.00796474	-0.00678077	-0.0194651	-0.188643	-0.0202042	-0.038668	-0.273289	-0.334059	-0.162054	-0.201923	0.197621	-0.355055	0.00498931	-0.0319722	-0.273548
ITGAL	-0.0982495	-0.0417683	0.00639012	3.83451e-05	-0.0153465	-0.0279071	-0.0332361	0.0222142	-0.0131957	0.0095987	0.091146	0.953101	-0.039212	0.127656	0.134686	-0.015388	-0.0296848	-0.0274987	0.0496137	-0.0256129	-0.0414438	-0.0369696	-0.0395564	-0.0436478	0.0738426
COCH	-0.325888	0.0306291	0.0251232	0.0844377	0.0534954	0.109307	-0.678282	0.122316	0.0792608	0.0609398	0.198808	0.0613858	-0.205457	-0.10892	0.150675	0.16698	0.0398812	0.00126295	0.575904	-0.0707724	0.223471	0.111873	0.0867813	-0.0184107	0.275704
C1orf210	0.641095	0.0333418	-0.171307	-0.302306	-0.339504	-0.0703941	-0.304865	-0.393659	-0.0269701	0.0624899	-0.460335	-0.322364	0.197979	0.132198	0.108821	-0.199987	-0.0637836	-0.239014	0.155435	-0.134719	-0.270943	-0.279139	-0.255609	-0.108284	-0.724297
ZNF638	-0.294913	0.00864587	-0.0454499	-0.0407946	0.251326	0.266753	0.345693	0.549106	0.0284994	-0.0930825	0.251237	-0.0547029	-0.0986589	-0.15573	0.0327042	-0.0339138	0.306327	0.425907	-0.136411	-0.00559475	-0.0341069	0.0546893	0.280329	0.0134886	0.396315
HP1BP3	-0.0788009	-0.039655	0.0121974	0.0521828	0.131624	0.0867548	0.845738	-0.0144847	0.107087	-0.0758103	-0.0310974	-0.116827	-0.116148	-0.292847	-0.00848843	-0.164549	-0.0774773	-0.117832	-0.761168	-0.032233	0.0142617	0.0757818	0.124717	-0.167627	0.15428
CERS3	-0.0258052	-0.0686939	-0.0451353	0.00060448	-0.0193883	-0.0256715	-0.516475	-0.067885	-0.0545018	-0.00366738	-0.0706282	-0.0325625	0.0606134	0.266545	-0.0113604	-0.0232034	-0.0120619	-0.0366701	0.341622	-0.0800206	-0.020762	-0.0572079	-0.0194646	-0.0889451	-0.119594
PCNXL2	0.0158354	0.397365	0.653772	-0.0299904	-0.13	-0.0984076	0.223132	0.0390423	-0.068905	-0.116037	-0.0841223	-0.114278	-0.141313	-0.199475	-0.127435	-0.125384	-0.111008	-0.12579	-0.218184	-0.118896	0.025649	-0.0749448	-0.114695	0.0191015	0.0456045
DNAJC5B	0.0053322	0.148579	0.0556782	-0.128211	-0.110677	-0.165955	-0.7077	-0.0798618	-0.0144795	0.162801	0.0186204	0.0242114	0.328254	0.26463	0.248574	0.358193	0.295048	0.449499	0.929306	0.128066	0.189762	0.201159	0.105777	0.133837	-0.0320568
GPSM1	-0.178511	0.208641	0.125592	-0.00676529	0.108102	-0.0196482	-0.565379	0.00145949	0.0132903	0.0777246	0.041586	0.0331318	0.327094	0.249526	0.292456	0.433173	0.371085	0.48452	0.857879	0.110075	0.184682	0.225243	0.0846636	0.108714	0.151011
FRYL	0.167386	-0.108032	-0.0646906	-0.0519091	0.140508	0.086982	0.327809	0.118038	0.121545	0.129286	-0.071886	-0.0193287	-0.301149	-0.358452	0.00678981	-0.222279	-0.276642	-0.186796	-0.461011	-0.17221	-0.257787	-0.610148	-0.083381	-0.116748	-0.159169
KLHL29	-0.0529965	0.167989	0.113602	-0.0675591	-0.0776325	-0.125013	-0.731528	-0.0475428	0.0178874	0.0855258	0.0147405	0.0273433	0.304427	0.285311	0.272437	0.3922	0.321923	0.406772	0.951412	0.0960108	0.184102	0.154109	0.036511	0.113013	0.00374505
CKAP2	-0.233677	0.0214763	-0.00826757	0.0715491	-0.00166691	-0.0591732	-0.342108	-0.0136963	0.738698	-0.07253	-0.0174675	-0.00879045	0.0211878	-6.01674e-05	0.362872	0.208868	0.109477	0.0119053	0.339401	-0.0291731	0.0771073	0.0592163	0.0399833	0.0267055	0.232314
MORN1	-0.00631701	0.0484727	0.0439629	-0.0364277	0.0563726	0.000545882	-0.595609	0.000652517	0.144406	0.0768528	-0.000155703	-0.00704649	0.141415	0.194203	0.118631	0.108651	0.122985	0.122425	0.594363	0.0414533	0.0895868	0.0491708	0.0769497	0.0316925	-0.0275927
CENPL	-0.118015	0.131961	-0.123209	0.180258	-0.176563	-0.168171	-0.0728094	-0.0845518	0.000371669	-0.146835	0.185121	-0.115585	-0.189732	-0.196571	-0.131997	0.0435622	-0.0433313	-0.158846	-0.00941849	0.164984	0.598706	-0.0575422	0.211167	-0.00893626	0.21419
ERAP2	-0.0114148	0.108774	0.0768422	-0.0276748	0.027094	-0.0322659	-0.739711	-0.0652887	0.0128696	-0.0327014	-0.0273666	0.0161233	0.239833	0.261252	0.1657	0.212176	0.206228	0.298371	0.877076	0.0811301	0.148596	0.0965024	0.0657284	0.0886762	-0.0424815
SSH1	-0.243552	0.00819432	-0.0515847	0.111651	-0.139343	-0.10634	0.221804	-0.0361372	-0.063953	-0.0783496	0.382245	-0.0382259	-0.116916	-0.114011	0.182721	0.363675	0.514418	0.0159017	-0.0397336	0.198285	0.118444	0.209993	-0.0166558	0.577865	0.37516
SART3	-0.00989251	0.168739	0.0822629	-0.0475431	-0.0907226	-0.0896249	-0.7267	-0.00983733	0.0225924	0.152819	-0.00976532	0.0314421	0.297834	0.234436	0.250527	0.367864	0.313196	0.401182	0.957367	0.116246	0.180017	0.195519	-0.00283337	0.12926	-0.00073484
FANCM	-0.0709891	0.0119898	0.00306905	0.0136275	0.032775	-0.0123651	-0.575823	-0.019259	0.0161216	0.0571091	-0.0366969	-0.0196386	0.0839285	0.197741	0.0770032	0.071477	0.442093	0.0708847	0.564815	-0.0265336	0.0874664	0.00556828	0.140499	-0.0214406	0.0272735
TRMT2B	0.106684	-0.0263865	-0.0160994	-0.0540752	-0.0833799	-0.0650808	-0.48711	0.127017	-0.0396912	-0.0185144	-0.17614	-0.0706882	0.640496	0.204898	0.00748166	0.0221942	0.0249915	-0.192794	0.427234	-0.0274305	-0.0297062	-0.0572291	0.0307913	-0.0671137	-0.218825
C9orf43	0.0231214	0.161318	0.0830795	-0.09495	-0.0375821	-0.177974	-0.733966	-0.0756367	-0.039449	0.0447803	-0.0140617	0.00908263	0.397826	0.268133	0.183143	0.334418	0.292134	0.376975	0.943956	0.114467	0.242061	0.172764	0.0290298	0.111346	-0.0556035
CCRN4L	-0.317437	-0.0441654	-0.0647311	0.187066	0.000523889	0.361596	-0.283007	-0.0235464	0.037284	-0.0234129	0.102572	-0.0256886	-0.0810422	-0.0403665	-0.0636678	0.260051	0.34921	-0.0399577	0.211369	-0.0975502	0.0739433	-0.0678991	0.503249	-0.00802287	0.299036
HAVCR2	-0.156344	0.0777232	0.0186189	0.0287637	0.0688297	-0.00530676	-0.575873	0.0264921	0.0341134	0.475579	0.0618345	0.0406622	0.191912	0.286058	0.366146	0.193729	0.439788	0.249973	0.710794	0.0364107	0.0876086	0.0923813	0.0532348	0.0426662	0.113911
FLJ25758	0.241539	-0.0362795	-0.0772427	-0.10871	-0.0920251	-0.119654	-0.320467	-0.111037	-0.110003	-0.042968	-0.0540581	-0.00996145	0.0654538	0.0362819	-0.00268796	0.044196	0.0248349	0.0408354	0.243123	-0.0568577	0.012487	-0.0107288	-0.0929616	-0.0646569	-0.237929
TRIM4	-0.391668	-0.191649	-0.0142292	-0.169101	0.475818	0.211885	-0.00261991	0.28373	0.247916	-0.0113806	0.203312	0.223008	-0.174724	-0.143197	0.236289	0.0875972	0.0787098	0.0801071	-0.0169115	-0.183794	0.164072	-0.154763	0.158601	-0.227674	0.338734
FAM160B1	0.0193807	0.0649942	0.0141161	-0.0719257	-0.0583876	-0.0713428	-0.70415	-0.0544961	-0.0269045	0.00223019	-0.0407414	-0.0246235	0.264491	0.188242	0.0529082	0.180505	0.167539	0.188434	0.708513	0.0329222	0.0939127	0.062124	0.00366443	0.044439	-0.085266
UHRF1BP1L	-0.12443	0.0407708	-0.00571071	-0.0471312	-0.0396036	-0.0355759	-0.347037	-0.0121357	0.0318637	-0.00463973	0.0199243	-0.0428669	0.0735809	0.131109	0.100193	0.0970932	0.833767	0.0983231	0.435358	0.00181207	0.405764	0.0236546	0.0518053	0.000579983	0.146436
TTBK2	-0.00241705	0.13062	0.0713312	-0.0506099	-0.0405	-0.0705017	-0.841073	-0.0380131	0.0132851	0.0432011	-0.0669319	0.00799933	0.273177	0.284951	0.187403	0.264069	0.413111	0.28702	0.967042	0.101637	0.160652	0.122057	0.0534614	0.0937325	-0.0413894
CYP19A1	-0.00654243	0.0785117	0.0675615	-0.0352035	0.0463217	-0.0529207	-0.88879	-0.0466454	0.00164871	0.100467	-0.0164632	0.0440286	0.216158	0.274589	0.136982	0.183979	0.186905	0.207885	0.939883	0.0684003	0.14081	0.0699005	0.0568249	0.0744203	-0.0703024
WDR49	-0.00117565	0.0653551	0.0523821	-0.0501689	-0.0134143	-0.0504425	-0.855809	-0.0402369	-0.0165928	0.0416532	-0.0578589	0.0389751	0.191045	0.284532	0.143349	0.169017	0.175202	0.200895	0.8958	0.0505016	0.124058	0.0629874	0.0692235	0.0732647	-0.0881587
NPAS4	-0.0282167	0.193501	0.0769208	-0.088147	-0.0266078	-0.0819278	-0.680899	-0.0196967	-0.0460696	0.0264792	-0.00663993	0.0142564	0.375935	0.296925	0.212268	0.393933	0.355944	0.467494	0.942345	0.138725	0.171153	0.2027	0.0506749	0.150789	-0.000729431
SVOPL	-0.0855801	-0.0582662	-0.0425863	0.858587	-0.0807873	0.0109303	0.11568	-0.0478759	-0.0580265	-0.0729604	-0.0256731	-0.0700439	-0.0839954	-0.132692	-0.102533	-0.09582	-0.0784509	-0.0722933	-0.169425	-0.0995336	-0.0426595	-0.0511607	-0.0535143	-0.0442128	0.0720934
LHFPL3-AS1	0.00202268	0.0368618	0.0371873	-0.0655226	0.0114846	-0.00503071	-0.956626	-0.0918463	-0.00487951	0.0643705	-0.0687641	0.00816334	0.177905	0.275675	0.152376	0.135074	0.129057	0.145954	0.906116	0.0246319	0.0970843	0.00450026	0.0590387	0.0483308	-0.124707
HNMT	-0.0295847	0.127581	0.0592367	0.0085163	-0.0131634	0.00384041	-0.767147	-0.00111573	-0.00702341	0.112006	-0.0241987	0.00958057	0.289382	0.297126	0.208964	0.259275	0.262042	0.325573	0.88587	0.045834	0.13967	0.126586	0.0738554	0.0875788	-0.0238118
MGC20647	-0.11827	0.112023	0.033233	0.0572194	-0.0611279	-0.13833	-0.530714	0.00873963	-0.0139131	0.142458	-0.0134367	-0.00436657	0.261802	0.303789	0.189239	0.738054	0.266654	0.413662	0.768155	0.110658	0.136325	0.137044	0.120637	0.121843	0.117758
ITPKB	-0.0458888	0.0344231	0.0273988	-0.0381343	-0.013604	0.0406792	-0.692119	0.044726	0.0712035	0.0838589	-0.00448737	0.0641507	0.131733	0.172836	0.0726329	0.0870786	0.10125	0.132854	0.661614	0.0325113	0.0820204	0.0196506	0.0262399	0.210049	-0.0131602
LOC644852	-0.0370298	0.155356	0.0776389	-0.0147191	-0.0164107	-0.0671847	-0.792427	-0.0467452	0.0122236	0.0974516	-0.0230401	0.0206965	0.299421	0.301647	0.227455	0.319504	0.29834	0.375622	0.973778	0.106338	0.159523	0.159895	0.00576916	0.10292	-0.0169542
GABRA2	-0.142375	0.583757	-0.00430463	-0.0267094	-0.0798649	-0.0659729	0.0246729	-0.0455575	0.038352	-0.054596	-0.0288136	-0.130092	-0.0346326	-0.0251333	0.0181221	0.0139859	0.585962	0.0363979	0.0886475	-0.0202657	0.0319286	-0.0188601	0.468611	-0.0135654	0.199219
EIF4G3	-0.306949	0.0236747	-0.0460701	-0.0081221	0.166416	-0.0371928	0.0780884	-0.0172439	-0.0235713	-0.0459266	0.502699	-0.0144971	-0.0770791	-0.0724226	-0.00714583	0.438299	0.690641	0.0596639	0.0465411	-0.00161707	0.0737579	0.0895869	0.318911	0.0769056	0.407061
SUPT6H	0.0150609	0.125167	0.0880336	-0.0229368	-0.0262684	-0.0823705	-0.839054	-0.042538	0.023994	0.0424807	-0.0527214	0.0198195	0.278911	0.318862	0.171522	0.259133	0.246904	0.292555	0.97281	0.0990775	0.153837	0.12319	0.0374242	0.0945305	-0.0699762
RNF170	-0.018489	-0.0769106	-0.103854	-0.140823	-0.100522	-0.115953	-0.0747566	-0.0838554	-0.102408	-0.0622108	-0.114359	-0.0169884	0.0628114	0.658445	-0.0577623	-0.0158572	-0.0516167	-0.0146468	0.0327013	-0.0317251	-0.0573678	0.444341	-0.0681047	-0.0708733	-0.12693
PGLS	-0.328673	-0.00220423	0.0658152	-0.00435866	0.627742	0.65977	0.309315	0.224186	0.1563	-0.00836499	-0.110328	-0.101971	-0.200416	-0.178068	-0.106067	-0.0698863	0.0968588	-0.0057516	-0.251378	-0.0712777	-0.211059	0.316945	-0.0328664	0.0479124	0.370701
TRMT61A	-0.214627	0.15273	0.0288754	0.007777	0.0850165	0.00799124	-0.691221	0.0326638	0.117791	-0.00120573	0.0679771	0.0353556	0.335038	0.328896	0.214782	0.400374	0.30683	0.407326	0.89114	0.0403525	0.165079	0.153626	0.0769258	0.111881	0.150815
RPS6KA5	-0.0138815	0.0807566	0.00159076	-0.0613595	-0.0843301	0.033691	-0.831916	-0.0238363	-0.0213442	-0.0469412	-0.056904	-0.0242585	0.206716	0.276673	0.0858098	0.217257	0.199517	0.197606	0.879041	0.0601549	0.126184	0.0638741	0.0706576	0.0472277	-0.0936756
NFS1	-0.0539464	-0.0190026	-0.0855667	-0.057312	-0.104104	-0.0756295	-0.494954	-0.0687671	-0.0996114	0.00122964	-0.0359197	-0.0699218	0.0368895	0.0789551	-0.0149372	0.0451353	0.064677	0.0259114	0.408036	0.595859	0.0473926	0.0330241	0.12245	0.00817775	-0.033683
HDAC4	-0.156695	0.531251	0.000143536	0.00794314	-0.00448101	-0.0424245	0.0332885	0.00318992	0.0282149	-0.033214	-0.0408458	-0.0788029	0.00936846	0.0134006	0.0162619	0.0515862	0.0424267	0.085205	0.139797	0.0234026	0.0837537	0.857274	0.0101989	0.0469656	0.28097
DYNC2LI1	0.00922439	-0.0508845	0.0637049	-0.133148	-0.11456	-0.112136	-0.463712	-0.151614	-0.129272	-0.00166105	-0.0208699	-0.0557009	0.0277536	0.0706326	0.00343852	0.0190927	-0.0228885	0.0490219	0.473118	-0.0171205	0.0162217	0.2476	-0.0146112	0.584222	-0.0635158
DOCK2	-0.0357926	0.098401	0.0583651	-0.0333356	0.0481512	-0.0529865	-0.778003	0.00840283	0.0311986	0.123732	0.0217378	0.00414911	0.243172	0.265843	0.179612	0.217861	0.212599	0.242586	0.870984	0.0569519	0.129905	0.0973147	0.0647824	0.0642719	-0.0138548
CANT1	0.0798886	-0.0204717	-0.317209	-0.0667056	-0.133897	-0.0376558	-0.197279	0.107605	0.00608509	-0.00756168	-0.104738	-0.187095	0.00851487	0.0527382	0.00759107	0.0202183	-0.00359812	-0.0227644	0.198637	-0.0102299	-0.00787382	-0.0348558	0.0129724	0.468525	-0.065734
STXBP4	0.00829608	0.0849066	0.0524345	-0.00694815	0.0189541	-0.0140483	-0.82384	-0.036392	-0.00402862	0.0659491	-0.0263876	0.0168022	0.204509	0.254168	0.145958	0.172864	0.183463	0.201486	0.851854	0.0709547	0.138802	0.076123	0.0555151	0.0623054	-0.0707853
LRRC18	0.0457015	0.0925024	0.0804239	-0.10452	-0.0802377	-0.121821	-0.676968	-0.0943358	-0.0323073	0.129981	0.0163709	0.0440299	0.221899	0.194744	0.211135	0.202447	0.202245	0.270397	0.825607	0.0620566	0.114881	0.0618429	-0.0209785	0.0354691	-0.120949
SLCO4A1-AS1	-0.307038	0.557185	0.275517	-0.0535169	0.152	-0.0687764	0.420876	-0.0765265	0.0671411	0.105384	0.319934	0.00826798	-0.18967	-0.233655	0.199168	-0.0985906	0.0177204	-0.0637332	-0.324226	-0.0428375	0.375861	0.203807	-0.0750959	-0.0256994	0.446716
DNAJA4	0.0211316	0.116758	-0.0276958	-0.0276061	-0.0838485	-0.0445675	-0.671094	-0.0956319	-0.0530498	-0.0360732	-0.110738	-0.0779837	0.07651	0.16786	0.0606552	0.131847	0.0486232	0.0320851	0.556922	-0.0512716	0.0437488	-0.0255809	-0.0219375	-0.0468927	-0.104185
CYTH4	0.0721743	0.106262	0.0401422	-0.0995797	-0.0410587	-0.0970671	-0.697888	-0.0727286	-0.0586981	0.00851526	-0.114059	0.0449142	0.283145	0.183804	0.0955694	0.215558	0.192494	0.236574	0.772496	0.0334226	0.105734	0.0715686	-0.00177703	0.0360604	-0.120905
FARP2	0.010458	0.105175	0.0818998	-0.0641804	-0.0930027	-0.112508	-0.844022	-0.0724204	0.00968396	0.0771139	-0.035352	0.0505761	0.233631	0.254258	0.498009	0.235639	0.225523	0.25169	0.928227	0.0751694	0.133852	0.0890235	0.00416444	0.0240998	-0.0767903
COG3	0.0335438	-0.0666724	-0.0745521	-0.0861789	-0.0445509	-0.09099	-0.327317	-0.15363	-0.0742952	0.156612	-0.127771	-0.145972	-0.0396343	0.143872	-0.0216686	-0.0306779	0.451024	0.164544	0.212564	-0.104093	-0.079483	-0.121677	-0.0869854	0.0483716	-0.0887835
DRAXIN	0.0106601	0.141684	0.0811762	-0.068325	-0.00642711	-0.0200422	-0.833602	-0.0352692	-0.0126386	0.0358278	-0.0772145	0.00861576	0.312226	0.288393	0.180359	0.290697	0.271167	0.328371	0.983704	0.105098	0.157069	0.170977	0.0206744	0.104974	-0.0627105
HELQ	0.311484	-0.0970742	0.025049	-0.168035	-0.111338	-0.109785	-0.698158	-0.144831	-0.161153	-0.0289162	-0.126428	-0.0929679	-0.101099	-0.0107401	-0.0174906	0.0160183	-0.101775	-0.0982557	0.447869	-0.175375	-0.0719761	-0.211893	0.212203	-0.18659	-0.357742
STAP1	-0.113602	-0.0273318	0.0139609	-0.00782586	-0.00942589	-0.00666593	-0.202793	0.120571	-0.0187911	0.0205569	0.0678194	0.919073	0.000703548	0.0378856	0.0154033	0.0105519	0.00053318	0.0134462	0.221643	-0.0188705	-0.00533839	-0.0231643	-0.0187521	-0.00632317	0.0858692
GIN1	0.457957	-0.263637	-0.0845892	-0.123224	-0.456464	-0.320378	0.0163843	-0.0668723	-0.25938	-0.0987147	-0.0726287	-0.0628909	-0.360862	-0.0975617	-0.236441	-0.13357	-0.174319	-0.0564016	-0.0629158	0.0148041	0.0401329	-0.00689466	-0.0415025	-0.219934	-0.478677
GNB5	-0.211889	-0.0250741	-0.0450556	-0.0316456	0.46519	-0.0219831	0.107129	-0.0142139	-0.0723931	-0.051398	0.0356374	-0.0822823	-0.0550307	-0.0987896	-0.0823401	-0.017014	-0.0355454	0.0141935	-0.126311	-0.0101997	0.00736575	-0.0182647	0.852208	0.0597986	0.2304
CDKN2AIPNL	-0.104445	-0.0250415	0.450049	-0.013567	0.00287272	0.262296	0.231384	0.241327	0.233118	-0.102433	-0.0953694	-0.117461	-0.0963954	-0.157621	-0.0597062	-0.0753117	-0.0191721	0.605213	-0.121537	-0.0812938	-0.0179329	-0.0591933	0.0727316	-0.052449	0.18407
XRCC6BP1	-0.173053	-0.0387112	-0.0440943	-0.0308202	0.143987	0.974613	0.0841743	0.113993	-0.0375544	-0.0842645	-0.0921301	-0.0735761	-0.0597429	-0.106248	-0.0717734	-0.0625246	-0.0511924	-0.0427687	-0.109167	-0.0588534	-0.0868161	-0.0484763	-0.0655078	-0.0287668	0.10207
DENND4A	-0.138346	0.180664	-0.186748	0.00793299	-0.0502837	0.146404	-0.276077	-0.0246126	-0.107435	-0.00972271	-0.11057	-0.123872	-0.217887	-0.0929199	-0.0125232	-0.0100868	-0.0229103	-0.0131677	0.230913	0.0260134	-0.00455733	0.0366273	0.0258296	0.675287	0.116628
SIAE	-0.0240581	0.0191274	0.00902526	-0.029295	0.0151868	-0.0230564	-0.864784	-0.0660855	-0.0256524	0.0520961	-0.0394328	0.0636365	0.163789	0.225903	0.0857627	0.097609	0.106982	0.116376	0.765105	0.00367742	0.0892406	0.00787225	0.0291806	0.00821681	-0.083181
GINS4	-0.188357	0.13206	0.386206	-0.0849161	0.384649	0.0219414	-0.555646	-0.0537113	-0.0640731	0.0595322	-0.0890232	-0.053999	0.269952	0.176096	0.148035	0.270726	0.234219	0.34215	0.732706	0.0673227	0.109054	0.184255	0.3921	0.117026	0.152138
FCHSD2	-0.281229	0.0272902	-0.00729355	0.647967	0.0254422	0.00507061	0.188922	0.00117309	0.027367	-0.0650711	-0.0189196	-0.107139	-0.111738	-0.127011	-0.0538126	-0.0624567	-0.0697721	-0.0381165	-0.143006	-0.0255877	-0.0241635	0.0609196	0.290488	0.706946	0.332699
BTG4	-0.000820312	0.0665097	0.0156909	-0.0854186	-0.0428616	-0.0869109	-0.654601	-0.0924407	-0.0534333	0.0357727	-0.0587643	-0.0308684	0.201623	0.207502	0.167818	0.210651	0.180201	0.268609	0.764412	0.0338958	0.103909	0.147337	-0.000913788	0.0362623	-0.114483
PPP2R5C	-0.13288	0.341345	0.0209292	0.0261369	-0.0173297	0.0209875	-0.0179445	-0.0241355	0.0522284	0.00528304	0.00593077	-0.0430293	0.0399409	0.0154636	0.0879112	0.0903144	0.790908	0.15911	0.229255	0.0292201	0.0334327	0.0502518	-0.0142587	0.00654025	0.186333
CALHM1	0.108754	0.0713988	0.0743208	-0.106101	-0.0256631	-0.144808	-0.492285	-0.0494135	-0.0693533	0.0611691	-0.0807307	-0.0675163	0.16335	0.457144	0.0722303	0.712551	0.159757	0.156391	0.603384	0.0352973	0.101968	-0.00639253	0.0401228	0.0424621	-0.0697847
PKD1L2	-0.0681515	0.0376182	-0.00979281	-0.034298	-0.0686107	-0.0959019	-0.124372	-0.0399269	0.0353246	-0.0186266	0.0481528	0.0667691	0.0158913	0.0171942	0.983727	0.091888	0.0711567	0.0930442	0.174004	0.00360993	0.0006236	0.0218134	-0.0196918	-0.0129881	0.075374
NR1H4	0.542206	-0.132966	-0.13418	-0.174533	-0.149415	-0.0930091	0.080962	-0.144102	-0.135076	-0.0953583	-0.167293	-0.102195	-0.0278406	-0.0913224	-0.0681036	-0.0817879	-0.110018	-0.120859	-0.0788387	-0.0864774	-0.116426	-0.119417	-0.135223	-0.135465	-0.517058
PTPLA	0.224385	0.0901713	-0.133832	-0.144288	-0.250535	-0.250507	0.273744	-0.186387	-0.116438	-0.143667	0.33698	-0.0342498	-0.186601	-0.225334	0.332028	-0.0669291	0.234567	0.0610148	-0.192083	-0.0605924	0.388754	0.118149	-0.160011	0.0138034	-0.00177855
PDE1C	-0.0663371	0.111048	0.0487127	0.0243377	-0.0656948	0.0267725	-0.832446	-0.0166805	0.0583982	0.114106	-0.0801525	-0.0106265	0.228853	0.210369	0.189873	0.213349	0.215188	0.24774	0.89367	0.0601566	0.148183	0.102778	0.100575	0.0746206	-0.00401508
TP73	0.0779233	0.0711607	-0.289779	-0.0416076	0.288706	-0.0330642	-0.184508	-0.0393001	-0.0298286	0.0412194	0.0198397	-0.023599	0.102399	0.072527	0.11055	0.168432	0.171628	0.703297	0.296411	0.0246361	0.0573811	0.0912082	0.0365168	0.076837	0.0922086
NEK11	0.431666	0.138934	-0.0324718	-0.0600016	-0.124861	-0.0548099	-0.15165	-0.0880418	-0.0562598	-0.0643651	-0.0902425	-0.0788531	0.0495348	0.0438563	-0.0130039	0.0441891	0.0312517	0.0306422	0.212834	-0.0229562	-0.0215638	-0.00633821	-0.0425343	-0.0198092	-0.257239
LINC00656	0.00560946	0.162152	0.0582148	-0.0249015	-0.0848854	-0.124493	-0.741382	-0.0401365	-0.0025397	0.0188484	-0.0422912	0.0279714	0.318301	0.301512	0.245217	0.370669	0.294633	0.353927	0.948903	0.103286	0.173325	0.197607	-0.018589	0.131029	-0.0351018
TRAM2	-0.0455715	0.152264	0.0162947	-0.0385387	0.00333024	-0.0523913	-0.725276	-0.0170892	0.0142357	0.0889142	-0.0106564	0.00545367	0.346061	0.277641	0.22158	0.30307	0.28684	0.340891	0.896626	0.110974	0.165812	0.242187	0.0583649	0.116776	0.00853496
PADI2	0.320653	-0.0814671	0.128948	-0.119804	-0.134652	-0.131005	0.0731236	-0.130547	-0.0679811	0.202585	-0.117316	-0.0379442	0.638598	-0.04077	0.269544	-0.0708929	-0.0554651	-0.0596268	-0.0554162	-0.0974443	-0.166136	-0.112904	-0.133519	-0.127675	-0.307604
CST9	-0.00549292	0.085631	0.0478318	0.00160082	0.0201064	-0.0701648	-0.763671	-0.0335865	0.0239958	0.134834	-0.0159808	0.00596927	0.259638	0.298513	0.183253	0.225743	0.216449	0.2461	0.866964	0.0590102	0.124454	0.0956176	0.0511718	0.0690328	-0.0497108
VPS29	0.0212679	-0.0360563	0.0513893	-0.0563278	-0.0460546	0.00218034	0.227696	0.0240964	0.00688363	-0.0127313	-0.106518	-0.214648	0.330247	0.273448	-0.0954187	-0.0240897	0.0905355	0.0778869	-0.0933302	-0.10473	0.133363	0.344226	-0.0973417	-0.222576	-0.0529207
ACTR2	0.417626	-0.301749	-0.0673868	-0.145299	-0.282341	-0.0511676	-0.49071	-0.248768	-0.0891144	-0.00180578	-0.409679	0.0264574	-0.125848	0.234269	-0.0598862	-0.0983631	-0.152133	-0.532716	0.183299	-0.165275	-0.0559127	-0.314844	-0.0930196	-0.108027	-0.563953
LOC653581	-0.0100775	0.0205728	0.0492714	0.00358199	0.0550475	0.0176814	-0.866174	-0.033571	0.0150123	0.0894587	-0.0132574	0.00872876	0.179378	0.273501	0.136857	0.113674	0.142447	0.137093	0.801923	0.00859955	0.0746611	0.0148801	-0.053238	0.000255553	-0.0892094
AZIN2	-0.0300066	-0.0199221	-0.0105636	-0.0230164	-0.0342521	0.0108488	-0.232008	-0.0495152	-0.0631893	-0.0863945	-0.134279	-0.0683431	0.106128	0.123714	0.01182	0.0519074	0.0323397	0.0703607	0.248886	-0.0073622	-0.0359936	-0.000630303	-0.0361559	0.0164422	-0.138101
NELL1	0.0367306	0.064146	-0.0161392	-0.0542631	0.00962164	-0.127807	-0.827848	-0.0685067	0.00639645	0.0703737	-0.0278965	0.0255706	0.182646	0.277104	0.259558	0.147432	0.163269	0.170935	0.835506	0.0622164	0.121738	0.0497061	0.0461754	0.0298011	-0.111151
UEVLD	-0.270512	0.0182746	-0.0358286	-0.0666423	-0.0869085	-0.103316	0.0695732	-0.0433412	0.378235	-0.0946231	0.067696	-0.0446411	-0.0536902	-0.062537	0.208717	0.0404426	0.309727	0.482427	0.107969	0.176001	0.58747	0.221247	0.304658	0.0314899	0.357988
LYG2	0.00961734	0.104333	0.0909811	-0.128435	0.0587114	-0.25659	-0.626234	-0.0334737	-0.0338019	-0.0264326	-0.168077	0.0244778	0.257468	0.301167	0.184351	0.452762	0.220578	0.298925	0.78698	0.112086	0.127822	0.130471	0.0780108	0.126778	-0.0522293
TCTE3	-0.117326	-0.00107751	-0.0368521	-0.0674121	-0.0372016	-0.107841	0.0602371	-0.0718015	-0.0768535	0.0611507	-0.0655988	-0.0941218	0.0277145	0.108511	0.00290366	0.260193	0.0195216	0.162448	0.201005	0.727957	0.0286413	0.330094	0.179888	0.240042	0.0755593
RP11-574H6.1	-0.0798216	0.183915	0.0871071	-0.00174277	0.0138126	-0.0335753	-0.704001	-0.0210519	0.0302602	0.0517515	0.0114609	0.0140403	0.340635	0.268149	0.268572	0.380486	0.344992	0.431192	0.954404	0.115865	0.166614	0.196978	0.0312688	0.136742	0.0470468
CLEC7A	0.0203011	-0.15305	-0.217079	-0.0343664	0.0282753	-0.185985	0.116638	-0.176197	-0.133028	0.048556	0.443933	0.306078	0.0819167	0.0847205	-0.103702	-0.0663487	0.0584647	0.0797229	-0.0824611	-0.0502875	0.0578341	-0.0634824	-0.10471	-0.0061729	-0.0760117
TK1	-0.124252	-0.0512344	-0.0857867	0.327793	-0.135627	0.0841268	0.280769	0.165573	0.357956	-0.464664	-0.00428752	-0.24099	-0.00457607	-0.33475	-0.161841	-0.146502	-0.124455	-0.221454	-0.389183	0.0525549	-0.123442	0.0354379	0.121295	-0.00202723	0.189835
WBSCR16	-0.000918327	0.0829204	0.0492848	-0.0665523	0.0494754	-0.0197943	-0.7936	-0.0512401	0.0190187	0.032132	-0.0648582	0.0118034	0.216301	0.245373	0.161211	0.21322	0.189409	0.246813	0.909926	0.0631064	0.170431	0.0719388	0.0568433	0.0971213	-0.0671778
CTNNB1	0.0627473	-0.0680078	-0.0381448	-0.0251162	-0.0972964	-0.0873094	-0.654538	-0.122833	-0.0870878	-0.0473775	-0.0954618	-0.0547588	0.0750799	0.129717	-0.0271019	-0.0318418	-0.016236	-0.0664159	0.417058	-0.106653	-0.00307839	-0.104708	-0.0346986	-0.076875	-0.190944
OSGIN2	-0.226784	0.158751	-0.181763	-0.066362	-0.193244	-0.121569	0.553052	-0.0508877	0.137479	0.12432	0.319776	-0.0149505	-0.253452	-0.29631	-0.163256	-0.00417009	-0.0863607	-0.158633	-0.475547	0.00658827	0.417266	-0.0219182	0.327607	0.363123	0.354985
TAF5L	-0.404445	-0.0673399	0.0900006	-0.0811547	0.363562	-0.0203028	-0.0872338	0.194953	-0.0966973	0.0479848	0.135274	-0.101857	-0.0390117	-0.00454934	0.0477635	0.0549007	0.301853	0.247685	0.215734	0.00264698	0.211008	0.188964	0.133852	0.387834	0.36598
APH1A	0.49834	-0.161419	-0.120274	-0.171028	-0.200626	-0.167896	-0.438542	-0.206085	-0.159732	-0.0931836	-0.188571	-0.128389	-0.0620702	-0.0160574	-0.107351	0.0177417	-0.125038	-0.183112	0.217774	-0.142856	-0.0689531	-0.211342	-0.116933	-0.160135	-0.501042
SPOCK3	-0.19093	-0.0251146	-0.0137179	0.956699	-0.0597139	0.0328444	0.107482	-0.00906981	-0.0387121	-0.0738191	0.0120594	-0.0521653	-0.0824085	-0.111487	-0.0886853	-0.0839152	-0.0217444	-0.0559948	-0.14353	-0.0684085	-0.0200661	-0.0490614	0.195165	-0.00430195	0.19564
GGNBP2	-0.00422492	0.197963	0.0449346	-0.00854334	0.0130045	-0.0168537	-0.592263	0.0120552	0.0471012	0.0737357	-0.0801625	-0.0283232	0.222219	0.27088	0.208995	0.197015	0.201261	0.386835	0.793761	0.0817571	0.117906	0.194011	0.0785942	0.121842	0.0095021
ATF3	0.176364	0.071388	0.00565866	-0.0960887	-0.0875969	-0.0191895	-0.662112	-0.102824	-0.0451978	-0.0100544	-0.0673092	-0.00680398	0.292736	0.19708	0.185912	0.21919	0.186214	0.169171	0.743306	0.0526123	0.0826696	0.0356974	0.0470876	0.0327557	-0.229295
FBXO7	0.510856	-0.27011	-0.132103	-0.112075	-0.207426	-0.0991557	-0.4633	-0.126593	-0.147567	0.0356553	-0.291102	0.0195714	-0.0153243	0.154521	-0.256511	-0.151967	-0.261106	-0.65809	0.144256	-0.150217	-0.27336	-0.213859	-0.175281	-0.220036	-0.635286
FIP1L1	0.40241	-0.107284	0.0651591	-0.155421	-0.211085	0.0359655	-0.455767	-0.162507	-0.119112	-0.0214006	-0.193657	-0.118234	-0.0613809	0.0463102	0.0596049	-0.0221105	0.102707	-0.0649209	0.383061	0.339597	-0.039865	-0.122559	-0.148438	0.034651	-0.369142
NLGN2	0.0371901	-0.0775807	-0.0741446	-0.0706638	-0.0838837	-0.0918555	-0.106289	-0.0826707	-0.10017	-0.0618147	-0.111029	-0.0441761	0.077537	0.0666222	-0.0468373	-0.0173813	-0.0422573	-0.0376237	0.0531764	-0.0501807	-0.074971	-0.0486497	-0.0710358	-0.0714568	-0.212808
DMWD	-0.261964	-0.0729473	-0.0870921	0.181622	0.208423	-0.0457018	-0.348778	0.204368	0.211192	0.0382858	0.10464	-0.038236	0.0736257	0.0845484	0.068299	0.0510494	0.169143	0.509051	0.453513	-0.00269013	0.0584807	0.0610204	0.23681	0.0327581	0.228915
SMIM11	0.028602	-0.0466562	-0.114558	-0.0378937	0.04587	-0.00546491	-0.37541	-0.141612	-0.053509	0.117977	-0.0387119	-0.00945896	0.0781492	0.132337	0.088981	0.0850559	0.0675752	0.0837142	0.384739	0.0422618	0.020864	-0.000146932	0.0259796	0.117234	-0.111601
ZNF146	-0.00577217	-0.121914	-0.0912205	0.125728	0.0127324	0.124851	-0.702492	-0.120607	-0.122051	-0.0230154	-0.126944	0.0142089	-0.0493141	0.0267064	-0.0692393	-0.0851174	-0.0696242	-0.106635	0.422446	-0.142642	-0.0325051	-0.150754	0.149476	-0.121374	-0.129264
REG4	0.619745	-0.221772	-0.123368	-0.252633	-0.235703	-0.105603	-0.238642	-0.136145	-0.218912	-0.188619	-0.242439	-0.246845	0.12472	-0.113169	-0.150181	-0.095857	-0.033478	-0.185232	0.104774	-0.0788972	-0.205647	-0.251266	-0.123569	-0.0389573	-0.588257
KIAA1217	-0.0982758	0.221973	0.164424	0.244734	-0.143668	-0.0612962	0.288505	-0.311689	0.0113027	-0.0191896	-0.0160891	-0.213156	-0.12974	-0.142128	0.0297038	-0.16315	-0.0428449	-0.0102723	-0.335925	-0.0316305	-0.167209	-0.289153	0.164423	0.0176731	0.033156
KIAA0513	-0.12937	0.0521611	0.0437332	0.0024295	-0.0405301	-0.0483718	-0.234123	-0.0119897	-0.00190772	0.0222352	0.0640612	-0.0405678	0.0546978	0.102117	0.0647568	0.097736	0.0807187	0.101468	0.361867	0.0660426	0.0403042	0.0473869	0.0690638	0.916082	0.149098
WAPAL	0.46464	-0.301375	-0.338256	-0.0767295	-0.340902	-0.0966398	0.17414	-0.135197	-0.238168	-0.402613	-0.221689	0.0878904	-0.143545	0.0514582	-0.0197626	0.131089	-0.247438	-0.25144	-0.280284	0.0225686	0.00728093	-0.0969045	0.0257047	-0.360524	-0.452338
BEST1	-0.0105544	0.0465441	-0.0457065	-0.0991632	-0.020291	-0.115272	-0.762748	-0.0805435	-0.0800225	0.110042	-0.0561119	0.00505721	0.420546	0.36502	0.22602	0.280144	0.240538	0.31009	0.892769	0.0506121	0.137667	0.105512	-0.00391038	0.0584952	-0.141637
SLC35F6	0.382282	-0.116584	-0.101116	-0.212007	-0.129853	-0.136874	-0.298119	-0.173016	-0.136608	-0.0791854	0.153458	0.0262103	-0.0414436	-0.0502595	-0.0687285	-0.0697157	-0.151982	0.0804242	0.152923	-0.109842	-0.0737751	-0.141329	-0.121741	-0.123419	-0.347158
ZNF85	-0.0494771	-0.0133118	0.870916	0.0425137	-0.0816284	-0.0659022	0.0591934	-0.0942189	-0.0620714	-0.0630688	0.0776646	-0.0185455	-0.0649147	-0.0880385	-0.0621869	-0.0660795	-0.0410226	-0.0624918	-0.0732539	-0.0616505	-0.101723	-0.0608155	-0.0904486	-0.0723889	0.0255097
JPX	-0.506124	0.150148	0.0943247	0.153149	0.350598	0.223234	-0.18175	0.173118	0.271382	0.00477719	0.229684	0.147737	-0.192781	-0.194169	0.223384	0.0618854	0.236925	0.183662	0.185553	-0.231578	0.300456	-0.23624	0.207395	0.19267	0.554116
DNAJC14	0.477974	-0.098978	-0.145789	-0.12323	-0.138903	-0.18007	-0.153335	-0.158828	-0.373862	-0.0775029	-0.191002	-0.0337576	0.0199529	0.151698	-0.0591854	-0.0484149	-0.0624179	-0.134461	0.0475234	0.024284	-0.085377	-0.10862	-0.0908988	-0.154439	-0.516153
HILPDA	-0.277604	-0.0261467	-0.0695978	0.00162607	-0.0408612	0.0679124	-0.320284	0.110635	0.261248	0.156737	0.0255258	-0.0109623	0.0976772	0.209297	0.0458656	0.109896	0.135701	-0.147712	0.177829	-0.147585	0.136133	-0.103244	-0.0931944	-0.103658	0.150259
HNRNPLL	0.0181294	-0.0358575	-0.0583769	0.0146255	-0.093816	-0.108135	0.0902227	-0.0624896	-0.0251713	-0.0666287	0.0462444	-0.0214505	-0.0731261	-0.0747329	-0.0251725	-0.0303404	-0.0543435	-0.0619396	-0.0262463	-0.0453488	0.900676	0.0197555	0.133283	0.0230034	0.0821201
LINS	0.206014	-0.100189	-0.485053	-0.164057	0.279757	-0.141123	-0.170466	-0.171805	-0.270963	-0.166777	-0.12781	-0.193955	0.0374876	0.190192	-0.153556	-0.0613595	-0.0829701	0.172841	0.108289	-0.20881	-0.00446672	0.385693	-0.00279207	-0.174837	-0.254539
CFHR3	-0.178374	0.0395892	0.25197	0.29979	0.475919	-0.0169093	-0.550321	-0.0394886	0.236031	-0.0766587	-0.0367128	-0.0436218	0.121811	0.157953	0.00124819	0.0936315	0.0985479	0.153819	0.562248	-0.00664352	0.0558805	0.0383036	0.0596369	0.0445793	0.144701
ST8SIA4	-0.0094801	0.0379808	0.0251789	-0.027233	0.00918979	-0.0225046	-0.945913	-0.0420416	-0.0135352	0.0694731	-0.0544873	0.0123841	0.169963	0.28661	0.145964	0.123818	0.142508	0.131146	0.890344	0.0177966	0.105854	0.0194197	0.066702	0.0118605	-0.0962265
DNAJB9	0.492656	-0.0818356	0.0739364	-0.201992	-0.24026	-0.337162	-0.599134	-0.538116	-0.261011	0.00664929	-0.227017	-0.0176487	0.00284734	0.280243	0.0812835	0.102146	-0.0186693	-0.257118	0.398324	-0.0475478	-0.105583	-0.332484	-0.0936542	-0.0670957	-0.61157
CRTAP	0.397693	-0.280775	-0.0295046	-0.0843117	-0.27536	-0.0464422	-0.199229	-0.182573	-0.225916	-0.0340509	-0.0765255	0.201765	-0.190115	-0.0328306	-0.155691	-0.0057851	-0.395884	-0.44749	-0.117599	-0.0514196	-0.153325	-0.294747	-0.212235	-0.119653	-0.417519
C16orf13	-0.0106522	0.000640022	-0.0084016	-0.0353335	-0.0533748	-0.0395977	-0.274757	-0.0647867	-0.0388467	-0.033343	-0.0314103	-0.0302418	-0.0157494	0.00400209	-0.0214614	-0.0275195	-0.0232664	-0.0452638	0.145491	-0.038227	-0.0137628	-0.0714317	-0.0320846	-0.0388861	-0.074455
FBF1	-0.00405784	-0.00341718	0.00771849	0.0731493	0.00411633	0.0174868	-0.662368	-0.02777	-0.00523388	0.0332234	-0.0362104	-0.0542267	0.0776724	0.134422	0.0568253	0.0301229	0.0544209	0.0200555	0.530288	-0.0316265	0.0422706	-0.0321795	0.0285995	-0.0318369	-0.0681102
ZBTB44	-0.125162	-0.00681899	-0.00913063	-0.0343288	0.0667988	-0.0225958	-0.667239	-0.0158399	-0.0441384	0.0940913	-0.0913121	-0.0233526	0.0582482	0.154031	0.0589292	0.0729351	0.0486092	0.0643421	0.623222	0.000730063	0.217937	0.268476	0.0421088	0.400027	0.0743789
ANKRD13C	0.37991	-0.0206657	-0.0410231	-0.0739711	-0.28611	-0.103963	-0.397568	-0.406319	-0.247743	-0.0224309	-0.185208	-0.131491	-0.252882	-0.0112849	0.0491062	-0.135234	-0.400424	-0.00735903	0.217666	-0.249849	0.0855994	-0.00721725	-0.00381249	0.136546	-0.392719
PHF20L1	-0.00264196	-0.150445	-0.0937254	-0.146413	-0.180576	-0.221146	-0.0955198	-0.259166	-0.00610134	0.12562	-0.0414126	-0.0379687	-0.00334182	0.0171607	0.502081	-0.0310997	0.508044	0.0174734	0.114188	-0.00940608	-0.00862517	-0.0475526	0.209138	0.0918509	-0.0592776
SRGAP1	-0.196361	-0.102418	-0.115048	0.0705366	0.710472	0.313906	-0.298305	-0.0712112	-0.116943	0.181778	-0.0637263	-0.069688	-0.0105389	-0.00554203	-0.114217	-0.105082	-0.0892068	-0.0184174	0.108782	-0.117046	-0.0821958	-0.0709623	-0.0690089	-0.0694975	0.0668175
MOXD1	-0.0483635	-0.208887	0.089999	-0.00493453	-0.128728	-0.20567	-0.0290679	-0.0457306	-0.169584	0.319285	0.171398	0.536539	-0.184593	0.0842508	-0.0139584	0.028144	-0.206803	-0.219935	-0.168481	-0.208803	-0.0376917	-0.201275	0.0215706	-0.214764	-0.0343002
C19orf47	0.27563	0.0693941	-0.017357	-0.0880395	-0.0813695	-0.138982	-0.43603	-0.0934185	-0.0871082	-0.0247842	-0.0719429	-0.0308622	0.27571	0.193063	0.0793824	0.324642	0.215604	0.350539	0.620164	-0.0356307	0.0476366	0.0587441	-0.0192101	0.0152073	-0.18473
ZNF808	-0.071519	-0.0229783	-0.00332544	0.206669	0.00248591	0.0713397	-0.82044	-0.0425715	0.0499124	0.105802	-0.0659726	-0.0252618	0.144715	0.224441	0.0790428	0.0347186	0.0726111	0.0724398	0.729825	-0.0488715	0.0445814	0.0207016	0.0101503	-0.02592	-0.0502422
HEATR3	0.0520009	-0.136618	-0.311705	0.306059	0.227595	0.37067	-0.162494	-0.0097633	-0.219534	-0.214581	-0.281869	-0.165081	-0.00850197	0.195051	-0.323769	-0.164629	-0.262138	-0.15425	0.0173038	-0.149431	0.029113	-0.189248	-0.137859	0.130917	-0.214244
CARD8	0.023165	0.168429	-0.0638089	0.0816346	0.0674086	0.0099885	0.497789	-0.33347	-0.204141	0.0803357	0.184315	0.276966	-0.216669	-0.294301	-0.103418	-0.14839	-0.0202668	-0.0830984	-0.533449	-0.217077	-0.0549473	0.135204	0.0581993	-0.336791	0.078626
ARMC10	-0.131716	0.116307	0.0762814	-0.0370626	0.222788	0.237013	0.725391	0.137906	0.279819	-0.0296455	0.0559995	0.126805	-0.0989144	-0.229815	-0.252935	-0.129035	-0.203129	-0.421985	-0.729734	-0.197668	-0.154113	-0.129661	-0.0236844	-0.133649	0.166182
EPB41	0.100469	-0.0405525	-0.02328	-0.0863613	-0.0867935	-0.0453489	-0.0804898	0.17849	0.559409	-0.0960997	-0.104808	-0.0984	-0.0387962	-0.0636177	-0.0660653	-0.0471136	-0.0573423	-0.0808728	0.0429111	-0.075744	-0.0364313	-0.0864039	0.175252	-0.0508692	-0.00586533
SAR1B	0.37195	-0.16659	-0.127903	-0.169222	-0.176816	-0.123586	-0.766345	-0.235091	-0.196886	-0.106443	-0.223659	-0.151184	0.0347418	0.245059	-0.0606146	-0.0283447	-0.0956623	-0.131643	0.499918	0.0147849	-0.0492229	-0.20276	-0.0962944	-0.171388	-0.520857
TMEM37	-0.0503646	-0.0375185	-0.0224879	-0.0459554	-0.0350638	-0.0470228	-0.344364	-0.0769146	-0.0594798	0.000558894	-0.0304509	-0.0253839	-0.0253743	0.0115898	-0.0216132	-0.0376502	-0.0331185	-0.0443783	0.178699	-0.049134	0.00461689	-0.0835181	0.164287	-0.0350705	-0.0473325
GFOD1	-0.0457713	-0.0307583	-0.190998	-0.172163	-0.00582458	-0.0164443	0.0659043	0.490896	-0.0951874	-0.0573312	0.0460528	0.0164731	-0.0495574	0.158785	-0.0278404	-0.127075	-0.159926	-0.00493108	-0.00633324	0.158484	-0.0188068	0.681472	-0.109991	-0.116671	0.086228
ATF6B	-0.11084	0.156443	0.0680184	-0.0912729	-0.0124558	-0.0852776	-0.544222	0.452611	0.0339619	0.0529401	-0.000566651	0.00184341	0.282477	0.23713	0.168933	0.313359	0.276353	0.354462	0.805208	0.110076	0.148037	0.183804	0.0427166	0.112267	0.11177
CEP70	0.0534585	-0.0413914	-0.0490205	-0.0482175	-0.079388	-0.167254	-0.28579	0.016615	-0.0832095	-0.256495	-0.0773204	-0.126967	-0.0374894	-0.126211	-0.0392201	-0.0308705	-0.0321061	-0.0657653	0.154794	-0.0766376	0.0178353	-0.0532369	0.1889	-0.0437813	-0.0768818
SERPINC1	0.00153886	0.124826	0.0374595	-0.00668351	-0.0805013	-0.057212	-0.865748	-0.0823039	0.00306672	-0.00261941	-0.104219	0.000935839	0.28517	0.288538	0.136893	0.259658	0.260363	0.296328	0.957353	0.0936475	0.159255	0.130291	0.0778662	0.103909	-0.0824677
THADA	-0.0144465	0.0511385	0.0753304	-0.040346	0.0649649	-0.0308815	-0.92939	-0.0680833	-0.0119241	0.0488706	-0.0518087	0.0227095	0.189422	0.25513	0.15793	0.156386	0.158569	0.169337	0.897943	0.0364965	0.115154	0.0368612	0.0426277	0.0367955	-0.0811425
MTHFSD	-0.00173551	0.0501466	0.0468483	-0.0222277	0.0375917	0.00016231	-0.917552	-0.0397298	-0.0113678	0.0859933	-0.0289026	0.0176024	0.184594	0.288183	0.142211	0.123825	0.148717	0.141398	0.877888	0.0318914	0.105525	0.0131499	0.0644588	0.0261368	-0.0999733
RAD51B	0.0729229	0.0515527	0.0307024	-0.174015	-0.124116	-0.0941912	-0.676834	-0.0946281	-0.162907	0.0437106	-0.131134	-0.00976635	0.412814	0.231515	0.104858	0.134914	0.128698	0.145722	0.688677	0.146009	0.181011	0.0229445	0.0264656	0.037789	-0.192708
PPA2	-0.15038	0.00963173	-0.00588527	-0.016849	-0.0487672	-0.0625833	-0.0694636	-0.00133347	0.0396619	-0.032324	0.025355	-0.070681	-0.000215338	-0.0224188	-0.00522144	0.0518057	0.0206396	0.0560224	0.0946806	0.00118695	0.0658617	-0.00256501	0.982135	0.0645147	0.170021
RGS7	-0.00129141	0.172003	0.0541257	-0.0206501	0.0269847	-0.00652031	-0.846127	-0.0324934	0.0227545	0.0741429	-0.0369597	0.00370169	0.198223	0.272094	0.153385	0.156253	0.174572	0.166877	0.867095	0.0580302	0.173678	0.0578664	0.0661516	0.05404	-0.0529548
TSC22D4	-0.337082	-0.0317673	-0.041424	0.36386	0.855729	0.373525	-0.0944895	0.119251	-0.0520862	-0.034885	-0.108209	-0.0537279	-0.042518	-0.0538312	-0.19314	-0.0622422	-0.0211415	0.0763171	0.0219239	-0.0636049	-0.0524622	-0.00549427	-0.000242129	-0.000204706	0.265416
OSCAR	-0.173674	-0.00752696	-0.0370627	-0.0101325	-0.0581427	-0.0591564	0.0687741	-0.0191333	-0.0550476	-0.0410865	0.951699	0.17831	-0.0618114	-0.0782621	-0.0466581	-0.0212344	-0.0152326	0.00514703	-0.048266	-0.00914564	0.049676	0.0256821	-0.0280053	0.0186812	0.201094
NAALAD2	-0.00609725	0.0582596	0.0564391	0.0138428	0.0363883	0.00224285	-0.803306	-0.0163282	0.0265615	0.0711857	0.00224148	0.0187539	0.175205	0.242892	0.155844	0.137381	0.150369	0.147507	0.807859	0.0552176	0.173155	0.051384	0.0853996	0.0436619	-0.0505912
PIK3AP1	-0.00992826	0.00201649	0.00622958	-0.013685	-0.0224364	-0.0159646	-0.368535	-0.0197556	-0.023505	0.0312791	-0.00136509	0.0434064	0.050892	0.0783445	0.0643733	0.0430654	0.0375014	0.034238	0.343585	-0.00582775	0.0141848	-0.029584	0.000131143	-0.0185845	-0.0443647
FAM188A	0.208885	-0.209858	-0.105982	-0.090345	-0.110192	-0.0752104	-0.600017	-0.149231	-0.120683	-0.0241689	-0.125562	-0.0835623	-0.11882	0.124201	-0.0395542	-0.0879268	-0.0920612	-0.0925518	0.311619	-0.127525	-0.166293	-0.179179	-0.0734663	-0.136701	-0.338427
GHITM	0.729524	-0.365274	-0.26317	-0.22853	-0.38125	-0.260834	-0.403547	-0.153942	-0.188451	-0.160491	-0.304897	-0.0586827	0.00478475	0.242756	0.0776895	-0.098129	-0.241198	-0.37914	0.142879	-0.0383691	-0.109313	-0.31861	-0.27928	-0.310171	-0.803626
WWC1	-0.124105	0.337553	0.0750973	-0.0291856	-0.0638817	-0.0171247	-0.390364	-0.0231618	0.0293129	0.0226597	-0.015003	-0.0470262	0.179002	0.142308	0.209021	0.244281	0.897899	0.283533	0.604117	0.0708443	0.0960196	0.115131	0.0428415	0.0593208	0.160263
ACSM5	-0.0408442	0.12706	0.0575443	-0.115403	-0.0319976	-0.153999	-0.667488	-0.0863874	-0.0465449	0.12858	0.0376112	0.0341339	0.28908	0.284968	0.176267	0.314917	0.257826	0.34727	0.852279	0.116589	0.247606	0.14984	0.0751255	0.117566	-0.0272568
LINC00537	-0.0318152	0.0247938	-0.0129894	0.67371	-0.0116927	0.026725	-0.0123147	-0.0309328	-0.0339967	-0.0458493	-0.0245623	-0.0371451	0.0150736	-0.0531572	-0.0122468	0.0232553	0.0292273	0.0758729	0.129929	-0.0349846	0.00207084	0.0239016	-0.0163141	-0.012663	0.073343
GSTCD	0.224859	0.022849	0.257214	-0.0569191	-0.0266218	0.0824961	-0.424655	-0.0981626	-0.144131	-0.0225351	-0.0908354	-0.273251	0.0994212	0.182207	0.0597813	0.0966312	0.103463	0.374311	0.5395	0.0397768	-0.0361784	-0.0202718	0.0189912	0.014827	-0.218544
CD80	-0.199558	0.00473926	-0.0540021	-0.0239602	-0.127517	-0.235049	0.0503144	-0.0437973	-0.0459294	-0.0337408	0.839662	0.16689	-0.0657382	-0.0556692	-0.00453857	0.139498	0.00137978	0.0132901	0.0337819	-0.000995307	0.594369	0.0648218	0.00030239	0.0421957	0.27136
LOC283861	-0.29397	0.410685	0.598517	0.0196042	0.0400894	0.346092	0.0902855	0.0776023	0.34345	-0.0804021	-0.128988	-0.0365642	-0.088555	-0.127215	-0.115446	-0.0757758	-0.0491117	-0.0647944	-0.0255575	-0.154383	-0.0601217	0.178435	0.331101	-0.114927	0.330699
CNNM2	-0.210433	-0.0396743	-0.0867816	-0.0897773	0.0757226	-0.0341294	-0.0454256	-0.045596	-0.0415416	-0.0936455	0.377123	0.0919023	-0.0882614	-0.10175	-0.0675602	-0.0198672	0.0160455	-0.0369811	0.0802097	0.181613	0.860594	0.0499584	-0.0220835	0.0343763	0.23914
OLFM3	-0.0296435	0.110781	0.0912493	0.0104851	-0.056721	-0.138211	-0.859566	-0.0401292	0.0166441	0.0238455	-0.0114901	0.0155591	0.249652	0.246835	0.134274	0.235606	0.225311	0.293398	0.950396	0.0777624	0.161167	0.116869	0.0873932	0.0828386	-0.0451197
VSTM2A	0.480592	-0.108548	-0.0999141	-0.140961	-0.138657	-0.115885	-0.0410745	-0.134909	-0.118487	-0.0656972	-0.128657	-0.0540677	-0.00194098	-0.0707392	-0.0507186	-0.0621375	-0.0785547	-0.0829789	-0.00923715	-0.0815616	-0.103136	-0.117653	-0.108978	-0.112968	-0.456957
TTC12	0.480721	0.000637056	-0.016162	-0.107039	-0.107386	-0.103693	-0.34762	-0.137088	-0.0940511	-0.00373411	-0.144754	-0.0748797	0.148989	0.170268	0.0388976	0.0876096	0.0862608	0.1306	0.428021	-0.0185196	-0.0392825	-0.0368227	-0.0486759	-0.0225302	-0.394309
C2	-0.237045	-0.0184251	-0.019604	-0.00125326	-0.0774189	-0.0486935	0.00107831	0.0163798	0.679564	-0.0823222	0.0325649	-0.0144322	-0.0606461	-0.0664291	0.136231	-0.00786987	-0.0284572	-0.0465972	0.0600567	0.349345	0.606735	0.0344063	-0.0273594	0.0410944	0.281497
DPYD	0.0329216	0.104762	0.0578777	0.0118616	-0.030318	-0.147605	-0.819124	-0.0729934	0.0114103	0.0858893	-0.0741242	-0.0015668	0.321759	0.334486	0.197686	0.28868	0.263829	0.309533	0.969732	0.0625514	0.134105	0.166995	0.0179513	0.0618044	-0.102985
TMEM126B	-0.202503	-0.013701	-0.0448147	-0.0162016	-0.0414374	-0.0809939	0.148193	0.0108392	-0.0278051	-0.0507457	0.0432173	0.0388023	-0.073099	-0.0740866	-0.0498665	-0.00096706	-0.0445585	-0.0157037	-0.0704677	0.00223571	0.269166	0.450522	0.855073	0.0638557	0.288832
RHOF	-0.0137594	0.0601037	-0.0202791	-0.0331014	-0.0854123	-0.107442	-0.0678895	-0.063021	-0.00947592	-0.00681124	-0.0233965	-0.0975398	-0.0109616	0.0195805	0.42206	0.249996	0.313845	0.123436	0.254243	0.0406989	0.0353225	0.318312	0.0681684	0.683319	0.163445
DNAH14	-0.00716874	0.052184	0.047731	-0.0159229	0.0459039	0.0243134	-0.929087	-0.0308258	0.00361018	0.0988298	-0.0291473	0.0500861	0.19495	0.288108	0.150209	0.144918	0.16505	0.178084	0.920523	0.0507598	0.124395	0.0344451	0.0607941	0.0290525	-0.0865643
GPRIN2	-0.0646586	-0.0144618	0.0959023	-0.0459655	-0.0515815	-0.0222231	0.142296	0.00669654	0.709045	-0.0963367	-0.0255941	0.0178446	-0.0628246	-0.103737	0.0641843	-0.0340321	0.0780857	-0.00347585	-0.0222273	0.274989	-0.0150649	-0.0255039	-0.0705204	-0.0439018	0.117015
SLC25A48	-0.0573093	-0.0192335	0.00146024	0.0208553	-0.00684832	-0.0188555	0.109504	0.1182	0.0270092	0.0628237	0.221469	0.128865	0.0932513	0.093136	0.0751286	0.141874	0.0859222	0.145563	0.10175	0.169081	0.0642068	0.240464	0.0357683	0.0790411	0.122769
SPAG9	-0.272966	-0.0493936	-0.0477229	0.225296	0.473307	0.580421	0.343683	0.0415233	-0.0167336	-0.0875859	0.0379829	-0.095281	-0.136266	-0.172819	-0.135715	-0.102897	0.493734	-0.0403824	-0.322036	-0.084231	-0.112595	-0.0319005	-0.0823429	0.0458686	0.289511
MBP	0.0540697	-0.0501193	0.126829	-0.0495597	-0.0552119	-0.0728722	-0.794435	-0.171989	-0.129868	-0.0385651	-0.143097	-0.013995	0.216239	0.291741	0.0498063	0.295783	0.0352942	0.00426013	0.665622	0.0441679	-0.034241	-0.197707	-0.0984501	0.0442398	-0.217727
APOBEC4	0.0398107	0.147249	0.104706	-0.0594169	-0.2067	-0.1894	-0.74752	-0.0870685	-0.0507017	0.141809	0.020899	0.0309393	0.252557	0.200817	0.250278	0.304268	0.277389	0.329954	0.914656	0.0601167	0.15074	0.155354	-0.0730816	0.0747731	-0.0906799
FAM13C	0.680654	-0.151308	-0.424623	-0.31871	-0.037895	-0.320081	-0.00323923	-0.237211	-0.408546	0.0210344	-0.00897605	0.145037	-0.0916122	-0.00667443	-0.112028	-0.164004	-0.373842	-0.221493	-0.146432	-0.149605	-0.052677	0.0462137	-0.306938	-0.326596	-0.626624
WDR20	-0.0771219	-0.135099	-0.133795	0.153682	0.353199	0.158574	0.22017	-0.0849596	-0.0774836	0.00888917	0.0245063	-0.111189	-0.0772964	-0.171467	-0.244415	-0.0844106	-0.330595	-0.0378047	-0.153996	-0.0325693	-0.00945246	0.591556	-0.205511	0.22891	0.0831372
KIAA1430	-0.0029679	0.0492027	0.0461205	0.0224035	0.0576272	0.0334479	-0.810839	-0.00696405	0.0294079	0.090071	-0.0275179	0.00260175	0.184788	0.272542	0.139776	0.129355	0.148462	0.152836	0.792671	0.0391495	0.107257	0.0460966	0.0607953	0.0372751	-0.0567715
YIF1B	-0.0545631	-0.0080326	-0.208453	0.165561	-0.197606	0.183488	-0.235474	0.0457107	-0.195868	-0.111049	0.0758605	-0.0728677	-0.131941	-0.0345861	-0.0296077	-0.166411	0.192679	-0.086916	0.0444794	0.266333	-0.0355745	-0.241821	-0.0756339	-0.0245101	-0.0121495
SETD6	-0.457893	-0.06527	0.336562	0.245315	0.0976447	0.300176	0.277901	0.437072	0.113095	0.0285072	0.250831	0.120805	-0.168691	-0.301552	-0.0441633	-0.115027	-0.137335	0.0856474	-0.132677	-0.0699017	0.373912	0.0553986	0.193749	0.195459	0.518571
ATP11B	0.0538374	-0.0193972	-0.314713	-0.193456	-0.0897671	-0.145609	-0.195979	-0.199911	-0.189762	-0.26516	-0.0415242	-0.247555	0.183516	0.295549	-0.0817305	0.117438	-0.193403	-0.173377	0.166595	0.157838	0.170502	-0.125014	0.409507	0.21964	-0.209854
DCAF5	-0.0486543	-0.0476408	-0.0835101	-0.128939	0.24334	-0.128763	0.0841442	-0.0941972	-0.107806	-0.102585	0.747444	0.089471	-0.0736385	-0.124528	-0.0876625	-0.0121728	-0.0570842	-0.017976	-0.0550269	-0.0191316	-0.0128824	0.0229217	-0.0420465	0.0154225	0.041303
GPR62	-0.177274	0.0408498	0.183054	-0.0713792	-0.100656	-0.076259	-0.132101	-0.03138	-0.0208024	-0.0243671	0.0208963	-0.0607852	0.0240405	0.032259	0.0515579	0.0958489	0.0687952	0.0958118	0.241067	0.00821489	0.489191	0.0314654	0.84472	0.0769148	0.202802
PGM5	-0.0833565	0.199622	0.108971	-0.0261417	-0.0390583	-0.106032	-0.650193	-0.0238039	0.00595682	0.0729154	0.0105229	0.0293184	0.339789	0.268805	0.266364	0.408484	0.365797	0.507147	0.92001	0.0953865	0.174072	0.198854	0.0269243	0.135411	0.0535011
SPPL3	-0.249838	-0.00604722	-0.0422044	0.082387	0.530249	0.49575	-0.644114	0.0775654	0.00386015	0.0289332	-0.00490361	0.00443552	0.0423848	0.0711015	-0.0180067	-0.00297069	0.0452626	0.0897856	0.552039	-0.044423	0.0400729	-0.0154967	-0.0391726	-0.00608055	0.135456
KCTD17	-0.0717932	0.154591	0.0740908	-0.0574055	-0.0250719	-0.0846822	-0.466786	-0.0182868	-0.0300435	0.0936106	0.0288433	0.0309482	0.248915	0.21517	0.195921	0.312248	0.270607	0.371879	0.735475	0.0825908	0.14186	0.175529	0.0577135	0.0965164	0.0362955
DYNLRB1	-0.104598	0.115495	0.0839227	-0.0149334	0.0600154	0.0376007	-0.279409	-0.00703922	-0.00275881	0.0483489	-0.0146854	-0.0360451	0.14094	0.124886	0.157108	0.195591	0.228045	0.960329	0.518394	0.0736647	0.0739771	0.097959	0.0550586	0.218989	0.139494
CELF2	-0.060226	0.0348396	0.0241845	-0.0700224	0.0090884	-0.0602073	-0.686413	-0.0663365	-0.0480474	0.069585	0.286449	0.0684036	0.121348	0.197549	0.0884853	0.113867	0.107328	0.132228	0.667854	0.0262304	0.109698	0.0276004	0.0373925	0.0463111	-0.0175294
APBB1IP	-0.106574	0.0727989	0.0209708	-0.00899703	-0.0374996	0.034225	-0.588179	-0.0451277	0.0075113	0.033956	0.0289639	-0.021697	0.167035	0.379613	0.148156	0.167283	0.807399	0.221567	0.662009	0.0403805	0.0674477	0.0496547	0.0184291	0.0144139	0.0475003
SUV39H2	-0.277491	0.0904858	-0.184689	0.146428	-0.0372447	0.149522	0.526087	0.277953	0.161597	-0.298006	0.309033	-0.193434	-0.391195	-0.36413	-0.0284313	0.126333	0.0322975	-0.012715	-0.414097	0.0403059	0.448156	0.283899	0.11826	-0.00537448	0.494275
CYB5R3	0.122939	-0.0382821	0.00255397	0.0352787	-0.112625	-0.0187156	-0.905203	-0.0797325	-0.0377365	0.0859982	-0.15205	-0.0494273	0.092353	0.221296	0.124048	-0.0287298	0.0620233	0.00108662	0.707169	-0.0605844	-0.0490587	-0.13158	-0.0108992	-0.0780978	-0.238393
BPNT1	0.414475	0.0648845	0.13681	-0.0915073	-0.260423	0.217395	0.182745	-0.0816168	0.00195717	-0.0800888	-0.393887	-0.206623	-0.0352362	-0.118665	-0.00589254	-0.192757	-0.0263905	-0.221257	-0.21068	-0.0511072	-0.462708	-0.335714	-0.233456	0.219922	-0.390727
ETV4	-0.297217	-0.0610512	0.12975	-0.033248	0.0456878	0.459245	0.00443631	0.724587	0.379796	-0.0802805	-0.0663832	0.217147	-0.0869193	-0.0831933	-0.107026	0.0500999	-0.0868975	-0.105023	-0.0034935	-0.0921518	-0.0779428	-0.066373	-0.0634819	-0.0333116	0.281465
PSMD10	0.377592	-0.129289	-0.105776	0.0299336	-0.2966	-0.172512	-0.510437	-0.33982	-0.250091	-0.138314	-0.125126	-0.0670115	-0.113512	0.0667151	-0.00362368	-0.0984549	-0.189922	-0.33491	0.196022	-0.113015	0.108957	-0.174663	-0.00922563	-0.0653589	-0.420596
ZNF70	-0.274587	0.00251108	-0.0261513	0.00971283	0.161952	0.838538	0.0373147	0.129904	-0.00933979	-0.0529785	-0.0578098	-0.0663892	-0.0345736	-0.0415118	-0.0285361	-0.0233915	-0.0085107	0.0290776	0.00287317	-0.0176178	0.0262108	0.423107	-0.0523256	0.0194556	0.248661
MYO18B	-0.0829298	0.0500364	0.0079244	-0.0104094	-0.0485198	-0.05103	-0.150605	-0.0356688	-0.0248201	-0.0136074	-0.00860417	-0.0394881	0.0261838	0.0306335	0.00276016	0.0442539	0.0258464	0.0444319	0.181191	0.962433	0.0344725	0.0375519	-0.0175346	0.0476722	0.0473249
METTL20	-0.0839177	0.00135763	0.968405	0.0724266	-0.0484379	-0.00386224	0.0473387	-0.0429251	-0.0198688	-0.0182978	-0.083971	-0.0474637	-0.00812123	-0.0783234	-0.0537651	-0.0601357	-0.0319882	-0.0540656	-0.0433202	-0.0604855	-0.0342796	-0.061224	-0.0351152	-0.0575216	0.0554554
LRRC48	-0.118796	0.722523	0.077408	-0.0534752	0.00622468	0.0163002	-0.329324	-0.0303772	0.0347981	0.0147021	-0.0506491	-0.0299991	0.151654	0.148165	0.0691936	0.164996	0.165416	0.219468	0.538568	0.045042	0.0787114	0.10801	0.0396469	0.0488702	0.128003
RHOBTB2	-0.315754	-0.0243255	0.76127	0.132322	-0.0934006	-0.0462296	0.217336	0.0342198	0.218614	0.155071	0.257003	0.16408	-0.150674	-0.184159	-0.1079	-0.0902765	-0.00712237	-0.0869408	-0.176572	0.274354	-0.0820239	-0.0592686	-0.0663483	0.274032	0.325332
TTC30B	-0.396941	0.317229	0.326385	0.117049	0.200021	-0.0560843	0.113979	0.181162	0.195393	-0.0745896	0.285185	0.0447476	-0.348882	-0.567791	0.0341747	-0.127758	-0.180343	-0.00598232	-0.123366	-0.0879283	0.458333	-0.0500966	0.182513	0.100841	0.515034
LENG9	-0.0728631	-0.0282662	-0.00391479	-0.02816	-0.0218705	-0.0403395	-0.428327	-0.024185	-0.0399627	0.0101926	-0.0305086	0.591493	0.262632	0.0712347	-0.00576925	0.00977387	0.00446094	-0.00915325	0.346943	-0.0594709	-0.0366885	-0.0557134	-0.0335823	-0.0640937	-0.0318081
PCAT4	-0.142894	0.220658	0.108197	-0.00819809	0.0228746	-0.0330537	-0.588847	-0.0130271	0.0126842	0.108392	-0.0226129	0.021963	0.355548	0.280505	0.248243	0.372243	0.377583	0.493823	0.865619	0.0964115	0.192652	0.183622	0.0472016	0.158313	0.0959115
SLC1A6	-0.0159256	0.173589	0.0951576	-0.0450412	-0.0531894	-0.092926	-0.76439	-0.0391481	0.00427145	0.0414916	-0.0327449	0.0135822	0.33307	0.270782	0.225323	0.347578	0.308445	0.390069	0.975656	0.121937	0.17469	0.182018	0.0310631	0.122168	-0.0229444
ARHGAP27	-0.252952	0.116846	0.0109778	-0.00667591	-0.054519	0.00596212	0.094694	0.0575648	0.836739	0.282994	-0.0319344	-0.06848	0.179236	-0.0717523	-0.0367606	-0.0229839	0.306757	-0.0447367	-0.0494649	-0.0920337	-0.0577623	-0.0126709	0.038399	-0.0126084	0.28391
SYMPK	0.449697	-0.201299	-0.298353	-0.0564194	0.127454	0.128202	0.272562	-0.0416915	-0.176941	-0.126154	-0.195127	-0.0845055	0.130143	0.100274	-0.279922	-0.170078	-0.362969	0.114532	-0.322384	-0.145513	-0.177134	-0.232037	-0.170639	-0.380724	-0.478497
LIG3	-0.600462	0.162174	0.139275	0.0791582	0.0393897	0.143863	0.114175	0.411697	0.324374	0.144127	0.224467	-0.00181287	-0.36037	-0.238782	-0.0541453	0.00539093	0.122886	0.128883	-0.034167	0.0460017	0.461772	0.33995	0.0763004	0.161499	0.68016
LMNA	0.0387119	0.217732	0.272299	0.141504	-0.49245	-0.132779	-0.0766687	-0.111797	0.109187	-0.102215	-0.0463155	-0.0767943	-0.16686	0.0324011	-0.0898584	0.0972761	-0.0808268	-0.20046	0.00835521	0.1233	-0.00978374	-0.148757	-0.16255	0.219299	-0.00176554
NKAIN2	-0.0774336	0.16402	0.06928	-0.0228802	0.0074667	0.0182383	-0.707508	-0.014	-0.0308861	0.0151508	-0.0367832	-0.0214121	0.327352	0.232013	0.20895	0.377751	0.316716	0.407617	0.937894	0.109042	0.171362	0.182846	0.234241	0.143879	0.0434121
RBM8A	0.068169	-0.0380463	-0.0448326	0.0985456	0.0928814	0.0211191	-0.487136	0.0653144	-0.0625567	-0.179576	0.0500878	0.0368746	0.211289	0.377602	0.0852927	0.156968	0.172987	0.157901	0.575677	0.0924918	0.0695073	0.0455954	-0.00733922	0.0231175	-0.0834375
MBTPS2	0.114739	0.00915977	-0.0179047	-0.171635	-0.0805676	-0.0950764	-0.84222	-0.112118	-0.0700392	0.082881	-0.147296	-0.00554733	0.191008	0.265973	0.133658	0.110657	0.116425	0.108794	0.761157	0.013855	0.0771046	0.0209624	-0.00901973	-0.00747492	-0.225826
CEP120	0.294544	-0.0771647	-0.0770111	-0.100056	-0.155227	-0.160392	-0.762921	-0.113214	-0.0936026	0.00596811	-0.0970502	-0.0523099	0.0774397	0.160451	0.0469379	0.019958	-0.0136483	-0.0269875	0.595739	-0.0691415	0.00404726	-0.0919367	-0.00331852	-0.0909775	-0.357361
CNKSR2	-0.0356553	0.0320912	0.00594238	0.0346964	0.0643424	0.00218786	-0.642806	-0.0096228	0.00949465	0.119912	-0.0209435	0.0128096	0.19406	0.282073	0.0959351	0.143335	0.140859	0.144865	0.71342	0.0283592	0.0747772	0.0397038	0.0744849	0.0179379	-0.0625192
TGOLN2	-0.361217	0.296467	0.298407	0.168223	0.140295	0.196482	0.369236	-0.00333275	0.152584	0.230019	0.0281576	0.0537655	-0.0247188	-0.13766	-0.0435547	-0.0437592	0.14225	0.30873	-0.212935	-0.29754	0.259182	0.273486	0.255021	0.0829585	0.513816
LOC100287896	0.0211866	0.116821	0.031853	0.270375	-0.216782	-0.185731	-0.0924252	-0.275426	-0.0322978	0.0169626	-0.0397987	-0.124728	-0.139405	-0.448808	0.00805057	-0.316743	-0.0995219	0.174919	0.0482601	-0.0329694	0.161937	-0.0799998	0.453659	0.188597	0.0184817
ANKMY1	-0.00529574	0.0378929	0.0141236	-0.0335808	0.055754	-0.00943127	-0.750645	-0.0604423	0.00288547	0.125912	-0.016961	0.00467645	0.255921	0.294751	0.151981	0.119518	0.134219	0.146747	0.746915	0.0471236	0.0697791	0.0152049	0.0498332	0.0224952	-0.102478
KIAA0226	0.0360605	0.0248868	0.0378036	-0.0146738	0.103071	-0.000685466	-0.76795	-0.0304687	0.0341614	0.0749143	-0.0268398	0.0108418	0.177019	0.261389	0.140358	0.129992	0.206179	0.123347	0.789829	0.0299268	0.0899862	0.0174711	0.0533677	0.0364863	-0.0858536
PTBP2	0.144338	0.0596678	0.00759854	-0.0819958	-0.0781178	-0.0897867	-0.831558	-0.0926844	-0.0722948	0.0517172	-0.0799683	-0.0146097	0.213482	0.205386	0.162719	0.197322	0.185638	0.217887	0.850439	0.039471	0.101251	0.0511452	-0.031463	0.0170127	-0.20574
SERPINB8	0.174791	-0.00831071	-0.0656508	-0.373366	-0.387857	-0.246945	-0.612588	-0.0504481	0.0208061	0.116081	-0.020078	0.0944025	0.372732	0.306122	0.240935	0.26479	0.209436	0.209536	0.74018	0.01669	0.146179	0.0868722	-0.141146	0.0245757	-0.262579
AGFG2	-0.0483972	0.211491	0.101389	-0.168772	0.078608	-0.0585672	-0.65812	0.00480329	-0.0509662	0.0847854	-0.0695459	0.0145407	0.395557	0.304412	0.215832	0.420688	0.378002	0.405982	0.900423	0.110199	0.166483	0.165013	0.0309387	0.131649	0.0117981
MBLAC2	-0.0104746	0.00681677	0.00440325	-0.0510023	0.00617158	-0.0534516	-0.884381	-0.0814267	-0.0405035	0.0553665	-0.054577	0.096893	0.164261	0.219856	0.113596	0.100957	0.116636	0.141287	0.804688	0.00848269	0.12478	-0.0118681	0.0233692	0.0369567	-0.104931
DGKE	-0.122076	0.0709306	0.0567869	-0.0184037	-0.00606537	-0.0306671	-0.736999	-0.0101887	0.0257365	0.0689423	0.0569172	-0.0059318	0.234931	0.244056	0.162806	0.20231	0.581675	0.180952	0.844193	0.0256113	0.294256	0.0309039	0.144102	0.046466	0.0631765
SIRPB1	-0.145385	0.0139767	-0.0260422	-0.0388846	-0.0840512	-0.0990668	-0.0823327	-0.039482	-0.0357665	-0.023118	0.939459	0.201742	-0.0191358	-0.0487152	-0.00708317	0.0265148	0.0194625	0.0570056	0.120959	0.00827239	0.0978476	0.0435953	-0.0277076	0.0348998	0.179407
BCL6B	-0.0641394	0.0429673	0.00203171	-0.0394795	-0.0774351	-0.096915	-0.331195	-0.0897407	-0.0503906	-0.0100578	-0.0601622	-0.0359804	0.146091	0.311849	0.0976127	0.169946	0.115441	0.177509	0.434211	0.899736	0.0638725	0.0899837	-0.0240921	0.0703707	-0.0265377
ASCC1	0.289367	-0.10597	-0.144641	-0.113744	-0.0933713	-0.145299	-0.022491	-0.395425	-0.445795	0.103991	0.0444472	-0.0319452	-0.222529	-0.259424	0.146312	-0.226683	-0.551447	-0.188077	-0.152627	0.0583125	0.0929619	-0.0179144	-0.0283779	0.2143	-0.285726
ZNF57	0.0806524	0.0722739	-0.168086	-0.22203	0.135264	-0.0763368	-0.638281	-0.0590934	-0.102421	0.215279	-0.0380186	-0.251965	0.138299	0.101951	0.0553986	0.0902023	0.228735	0.0124452	0.649574	0.067302	0.0165092	0.182374	0.0348311	0.0802027	-0.137791
EPHA7	-0.00194261	0.107531	0.168192	-0.0769275	0.0322505	0.00920402	-0.88996	-0.061469	-0.0271712	0.0306932	-0.0682418	0.00921889	0.257156	0.248377	0.142974	0.237472	0.229017	0.268906	0.96074	0.0953133	0.137653	0.0959576	0.021282	0.0790347	-0.0677425
MYT1L	0.000565777	0.107998	0.0534442	-0.0505753	0.0250669	-0.0362784	-0.772554	-0.092139	-0.0303068	0.0234832	-0.0916833	-0.00937238	0.267418	0.300818	0.148835	0.23238	0.230772	0.279971	0.90131	0.0749555	0.135782	0.109998	0.0182114	0.0670608	-0.0887451
PDS5B	-0.0663934	0.0574455	0.017216	-0.0389426	-0.0422158	-0.0562402	-0.683125	-0.048827	-0.0215452	0.0432901	-0.0498904	-0.0192768	0.171476	0.252369	0.103841	0.145563	0.642672	0.176921	0.714695	0.0297312	0.0769878	0.0347845	0.0281928	0.0250386	-0.0120756
NPAS3	-0.0895563	0.166109	0.0998553	-0.0400464	-0.0258458	-0.0645311	-0.636567	-0.021763	-0.0174937	0.0827726	0.0167167	0.0466603	0.362666	0.269276	0.293007	0.407978	0.348255	0.435802	0.907136	0.0653527	0.191523	0.190179	0.00596018	0.118026	0.0371489
CBFA2T2	0.193782	0.0146214	-0.0245896	-0.168706	-0.120136	-0.0778546	-0.429868	-0.101543	-0.106212	0.0169652	-0.0773506	-0.0684425	0.153902	0.0639326	0.110302	0.184966	0.119677	0.133764	0.490099	-0.0395797	0.0682661	0.029738	-0.105244	-0.0254698	-0.22139
ZFYVE16	-0.127939	-0.0595052	-0.0663918	0.00811816	0.0448187	-0.0265414	-0.625407	0.194213	-0.0489559	-0.0248227	0.429341	0.0561362	0.0343215	0.106496	-0.0448242	-0.00899696	-0.00436596	0.0080696	0.506102	-0.0769666	0.0693227	0.0365162	-0.047755	-0.057071	0.0526334
PALM2	0.142705	-0.0136883	-0.0356947	-0.0894344	-0.0559844	-0.10951	-0.000493615	-0.0534379	0.0441485	0.0939597	0.0243845	0.0424959	-0.0330537	-0.0583808	0.778023	0.0393776	0.000975193	0.0202573	0.0236023	-0.0356666	-0.0445656	-0.0301275	-0.0712438	-0.0507177	-0.00857988
TET3	-0.0402474	0.162003	0.0829432	0.0164361	-0.00977786	-0.0428797	-0.704747	-0.00823332	-0.0668067	-0.0111334	0.00219223	0.0231407	0.343153	0.324573	0.238423	0.359783	0.319771	0.423638	0.934623	0.076344	0.156898	0.154426	0.0706828	0.106031	0.000642061
RNF32	0.038001	0.131491	0.013996	-0.0709903	-0.00641157	-0.0626606	-0.609109	-0.0546037	-0.0219969	0.0693813	-0.134124	-0.0559538	0.342446	0.303484	0.165773	0.351635	0.296649	0.398145	0.857969	0.0629084	0.105948	0.143593	0.0207018	0.0840996	-0.123485
RGS11	0.0191891	0.0388339	0.0192073	-0.036099	-0.0242986	-0.0317009	-0.855976	-0.0275355	0.0137699	0.0543619	-0.0273002	-0.0346157	0.173423	0.236468	0.117438	0.121341	0.136642	0.118999	0.817521	0.0191951	0.0995903	0.0137164	0.0675137	0.009287	-0.100298
OSBPL1A	-0.102839	0.0508325	0.0311118	-0.0401202	-0.0150417	-0.0849171	-0.433844	-0.0280689	-0.00832767	0.0819608	-0.0619514	-0.0526337	0.156633	0.134572	0.127586	0.149124	0.144428	0.201745	0.56404	0.0306453	0.0433273	0.0655135	0.0349829	0.65125	0.0567268
DUOXA1	-0.0646867	0.103345	0.110036	0.0748214	-0.0856268	-0.0395481	-0.533264	-0.133034	-0.0535785	-0.0439546	-0.105706	0.140439	0.10281	0.436658	0.181734	-0.0381976	-0.0132702	0.00222762	0.38464	-0.0324431	-0.107228	-0.0955358	-0.0310038	-0.115066	-0.103007
RP3-412A9.16	-0.0915728	0.134209	0.072099	-0.0573987	-0.0210031	-0.0895996	-0.68234	-0.0421895	-0.0359338	0.0840696	0.0202457	0.0592513	0.38982	0.30189	0.288432	0.363217	0.331593	0.404358	0.915032	0.0617065	0.20607	0.154742	0.0132662	0.102367	0.00409114
MAST4	-0.0691911	0.0620653	0.903022	0.0546987	-0.0451634	-0.0265368	-0.288432	-0.057057	-0.01416	-0.00881317	-0.0522358	-0.0385661	0.0807164	0.0291093	0.0583216	0.0801515	0.0906915	0.0736842	0.345552	-0.0259427	0.0119602	0.00895119	0.007116	-0.0144698	0.0378271
RPRML	-0.088262	0.0587236	-0.0140242	0.00955748	0.073568	0.161608	0.00910589	0.0102561	0.00726032	0.0115241	-0.0593117	-0.00939147	0.0274221	0.0364077	0.272601	0.0629174	0.117637	0.929578	0.159526	0.0289976	-0.0150223	0.0336978	0.0138629	0.043265	0.139829
C20orf26	0.0121405	0.131297	0.0555006	-0.0771314	0.0235208	-0.0177508	-0.111169	0.0284743	0.0344304	0.103706	0.0546161	0.0457251	0.182235	0.119078	0.12884	0.296295	0.174277	0.298194	0.371526	0.127824	0.0993556	0.156211	0.0837034	0.0926861	0.0633179
NEK4	-0.182017	0.0405246	-0.137535	-0.0399845	0.142504	0.950276	0.0513389	0.240791	-0.0278968	-0.0720811	-0.161508	-0.0975358	-0.0364489	-0.0633025	-0.074878	-0.0809669	-0.110796	-0.0310766	-0.0749885	-0.103709	-0.0736656	-0.0177946	-0.0576968	-0.0213408	0.0980307
CNST	-0.129376	0.00656233	-0.119574	0.0417041	0.0989577	0.0253189	-0.241865	-0.170962	0.014945	-0.0155962	-0.0891197	0.0269567	0.0450327	0.0903945	0.278127	0.0499366	-0.0762496	0.192511	0.169871	0.015506	-0.0882703	0.0277753	0.392839	-0.108744	0.0669549
C17orf47	-0.0870394	0.129616	0.0456905	-0.0925751	-0.112693	-0.166298	-0.560521	-0.0634877	-0.0134096	-0.00987956	0.555936	0.139631	0.216737	0.149055	0.367217	0.270773	0.24679	0.300687	0.741327	0.0886544	0.176372	0.164408	-0.0194423	0.0985516	0.0899921
NUMA1	0.304872	-0.0721886	-0.0858967	-0.0996357	-0.0949088	0.0283765	0.0303744	-0.0707426	-0.0891818	-0.0665498	-0.105979	-0.0472974	-0.0195872	-0.0855811	-0.0527599	-0.0388124	-0.0648176	-0.0652223	-0.0747935	-0.0649528	-0.0847226	-0.0810957	-0.0409788	-0.0785397	-0.271363
NAIF1	-0.0956404	0.369068	0.109411	0.0327171	0.0568689	0.0216577	-0.779823	-0.0607105	0.0420301	-0.0262278	-0.00710836	0.00596498	0.237327	0.288378	0.233303	0.269756	0.259662	0.357811	0.912975	0.0689797	0.14653	0.141495	-0.0109458	0.0795939	0.0608621
ZNF586	-0.310838	-0.0131386	-0.0184528	-0.0330202	0.574473	0.00292153	0.114909	-0.0190602	0.0726264	-0.0741217	0.744105	0.0965531	-0.0943549	-0.137549	-0.0985836	-0.0373145	0.144924	0.0487829	-0.106462	-0.00543839	0.0149538	0.0499102	-0.022498	0.0327217	0.35061
LOC100130950	-0.0284541	0.0531972	0.0538781	0.160821	0.0495373	-0.00884012	-0.772661	-0.00856675	0.0150772	0.0825777	0.000629846	0.0214531	0.250219	0.322994	0.132844	0.155239	0.231097	0.177047	0.844273	0.0723544	0.136354	0.0492676	0.0864155	0.0841694	-0.0303641
METTL8	0.241239	-0.00763449	-0.250063	0.151627	-0.131363	0.0531638	0.231341	0.0390648	-0.366601	-0.153512	-0.0791614	0.135039	-0.298174	-0.146014	-0.262788	-0.219284	-0.167488	-0.127944	-0.337135	-0.41733	0.0100741	-0.0669904	0.0367564	-0.11923	-0.176707
FAM151A	-0.0713971	0.167602	0.105829	-0.0379209	-0.0459091	-0.060413	-0.713413	-0.0293894	-0.00370162	0.0660977	-0.00642218	0.0196145	0.325198	0.265754	0.267501	0.367191	0.327544	0.424365	0.938284	0.0824675	0.165857	0.154827	0.0138945	0.114782	0.0119309
GGA1	0.0435626	0.0203469	-0.0135802	-0.0322314	0.0326545	0.0744149	-0.879524	-0.0436635	0.0103234	0.0576185	-0.0953191	-0.0368759	0.172107	0.359971	0.0792622	0.108208	0.126363	0.102045	0.818306	0.00074867	0.0643638	-0.0184291	0.0239471	-0.0113281	-0.148262
SRRM2	-0.251626	0.14179	-0.0172988	-0.182755	0.418769	0.269979	-0.127025	0.266805	0.120773	0.208295	0.000789698	0.0183986	-0.0450403	-0.0417613	0.0769847	0.149186	0.115045	0.396938	0.14615	-0.0367678	-0.25886	-0.224832	0.256479	-0.0234603	0.232831
TTC26	0.0197563	0.140877	0.0587769	-0.17186	-0.186396	-0.11867	-0.69641	-0.0507888	-0.0593134	-0.00652884	-0.0329944	0.0318409	0.29942	0.254095	0.162696	0.238703	0.239382	0.241283	0.855115	0.10975	0.174114	0.15935	0.128246	0.0930591	-0.0857329
SYCE1	-0.0298429	0.0878855	0.0679567	0.032095	0.0630624	0.0285109	-0.783793	0.00690648	0.0353966	0.0784231	0.0315042	0.00746342	0.221029	0.31667	0.1651	0.175153	0.201033	0.252947	0.870977	0.0646244	0.138314	0.103447	0.0858514	0.0568551	-0.0114475
SRGN	0.244248	-0.0851699	-0.125978	-0.154028	-0.119908	-0.155601	-0.072488	0.198257	-0.118304	-0.0556887	-0.0275567	0.00630053	-0.0304497	-0.0537665	0.00795971	-0.0373567	-0.00698734	-0.048758	0.0538986	-0.0697724	0.244488	-0.0355699	-0.098245	-0.0584071	-0.175236
CMTM4	-0.0740549	-0.0951828	-0.066578	-0.0940199	0.0781667	0.547365	-0.111035	-0.0393055	0.0793215	-0.0545319	-0.126171	-0.100234	-0.0337383	-0.0167706	-0.0787926	-0.061113	-0.0775884	-0.0455061	0.0782398	-0.0607992	-0.000607044	-0.0939437	0.172163	-0.0473078	-0.0634246
HNRNPDL	-0.0605067	-0.212694	0.0458749	0.179333	0.0924702	0.256451	0.0948798	0.108136	0.00593775	-0.0779926	-0.00403039	0.229955	-0.464984	-0.181506	-0.128217	-0.313961	-0.318744	-0.479705	-0.41768	-0.16919	0.00378996	-0.0826183	0.00820026	-0.09289	0.0952921
LAPTM4B	0.189723	-0.257125	0.0790837	0.0707802	-0.216529	0.0171134	-0.43868	-0.191032	-0.0871744	-0.0103046	-0.0420049	-0.164502	-0.175282	-0.0206663	-0.163939	-0.104696	-0.230647	-0.278504	0.161285	-0.230087	0.169777	-0.0905511	-0.112412	-0.262038	-0.289496
MGC50722	-0.017106	0.0374215	-0.0208577	-0.134022	-0.0239265	-0.065826	-0.604577	-0.00941716	-0.00341689	0.319646	-0.00888881	0.0366742	0.221681	0.216415	0.11046	0.173957	0.182499	0.213554	0.686636	0.00883595	0.0400313	0.0511597	0.0249931	0.0291937	-0.0757562
CEMIP	-0.0688778	0.191632	0.0948193	-0.0358943	-0.0517416	-0.0596606	-0.650047	0.000426185	0.0120102	0.0900582	0.0126221	0.0278029	0.348046	0.292207	0.251054	0.400038	0.358489	0.448105	0.926424	0.119079	0.172872	0.194114	0.0475695	0.147124	0.0428427
STAU2	-0.0261605	0.0107717	-0.0162395	-0.0938189	0.0367026	-0.0426234	-0.724605	-0.0247687	-0.0587706	0.00939923	-0.0536208	-0.000686493	0.123475	0.118751	0.0549532	0.0798648	0.0875933	0.0973063	0.619204	-0.0214071	0.0798398	-0.0079622	-0.0244144	0.0320834	-0.0828613
NLGN4X	0.09757	0.0611072	0.0646014	-0.110472	-0.096099	-0.137374	-0.839071	-0.111277	-0.0604349	0.00683872	-0.0989235	0.0341637	0.205498	0.299694	0.165943	0.163271	0.162653	0.186864	0.817237	0.0568035	0.114994	0.0401987	0.0921699	0.0301576	-0.180982
TACC1	-0.299884	-0.0899561	0.184269	0.106442	0.0989053	0.121025	0.112042	0.27624	0.0398155	0.210892	0.229198	0.229272	-0.184646	-0.00827057	-0.110746	-0.00718392	0.0352856	-0.191556	-0.194263	-0.410314	-0.0215064	-0.398048	-0.00178568	0.254188	0.2366
PACSIN2	0.0947886	0.247504	-0.0289066	0.0194937	-0.210349	-0.294385	-0.564808	-0.328193	-0.169095	0.0108226	0.0366418	-0.181009	0.0306165	0.192905	0.00273412	0.107224	-0.0498806	-0.0289361	0.38975	0.197147	0.0682533	-0.024246	0.0748981	0.0462219	-0.139557
SLC23A2	-0.0314694	0.128357	0.0945748	-0.00481625	0.0407128	-0.010184	-0.771777	-0.0383151	-0.0164558	0.152771	-0.0401373	0.00983961	0.319564	0.29291	0.197834	0.282699	0.283464	0.377799	0.928492	0.063972	0.122972	0.133675	0.0556872	0.0810739	-0.0330246
CCNY	-0.0106001	0.0367559	0.0181236	-0.0550541	-0.00409516	-0.0479397	-0.547608	-0.0555129	-0.0304239	0.0969576	-0.0290839	-0.00531208	0.110476	0.160231	0.0784884	0.167908	0.104313	0.134698	0.548277	0.0257303	0.069774	0.0180447	0.0214241	0.0306673	-0.0607596
TYMS	-0.244532	-0.0964218	-0.120201	0.197633	-0.110885	0.0813671	0.402177	0.208971	0.038247	-0.247732	0.347548	-0.248236	-0.287038	-0.278636	-0.0348171	-0.0137144	-0.0544117	-0.212875	-0.397938	0.177825	0.209168	0.361274	0.436476	0.122273	0.415808
ADAMTS9	-0.0381722	0.0652916	0.0432196	-0.00418064	-0.0952117	0.018324	-0.787229	-0.0288164	-0.0662637	0.0825533	-0.100572	-0.00323525	0.249343	0.25734	0.171062	0.18875	0.173253	0.186804	0.806869	0.00905059	0.102358	0.0566444	0.0385218	0.00554092	-0.0586329
L3MBTL4	-0.0372457	0.127308	0.0395367	-0.0900381	0.0865614	-0.0949799	-0.69268	-0.00782088	0.0561105	0.13728	-0.0357919	0.00392865	0.295602	0.351156	0.252535	0.27324	0.252129	0.319618	0.859846	0.090148	0.120214	0.136211	0.00442891	0.0881172	-0.0268403
CDH7	0.0125359	0.0648053	0.0579608	-0.035002	0.00620908	-0.0251482	-0.939254	-0.0532307	-0.00488176	0.064001	-0.0522275	0.0167019	0.196916	0.274537	0.144797	0.16463	0.166332	0.179854	0.932561	0.0548478	0.132826	0.0409448	0.0558158	0.0441444	-0.101894
TBC1D16	-0.560158	-0.0295177	0.0352223	0.0960804	0.386063	0.352811	0.544707	0.338621	0.244621	0.0911258	0.357586	0.252789	-0.123557	-0.226962	-0.139864	-0.100366	0.187978	0.183821	-0.36518	-0.0598383	0.0315801	0.150114	0.129241	0.34805	0.646248
NALCN	-0.0640476	0.195196	0.11019	-0.0250099	-0.0391311	-0.0853065	-0.65458	-0.0192512	0.015717	0.0556812	-0.00271374	0.0224867	0.358064	0.275488	0.267783	0.398134	0.357741	0.44374	0.932	0.119353	0.172602	0.21691	0.020986	0.142917	0.037563
ATP8B3	0.0147266	0.0608102	0.0490094	0.0190132	-0.00595936	-0.0822204	-0.307579	-0.0935333	0.01568	-0.0304854	-0.058457	-0.0377073	0.894371	0.20456	0.0695084	0.118499	0.344706	0.172133	0.452282	0.0503741	-0.00284228	0.0196454	0.0255213	0.0144855	-0.0997442
SCARA5	0.0327554	0.157139	0.0981683	-0.191013	0.003521	-0.239414	-0.776674	-0.0790778	-0.0712855	0.101178	0.00870617	0.0450348	0.306558	0.288043	0.221544	0.305531	0.262441	0.353699	0.932362	0.0793012	0.16916	0.156544	0.0650855	0.114035	-0.0806745
OR2L13	-0.0132756	0.0451188	0.0292238	-0.0290527	0.0293409	0.00807211	-0.783407	-0.0583655	-0.00615222	0.0441058	-0.0353143	0.12473	0.145862	0.212613	0.121183	0.108375	0.118719	0.166428	0.751441	0.0512192	0.118882	0.0354555	0.0366175	0.0244792	-0.0739248
SPATA6L	-0.096838	0.0835122	0.0394001	-0.0184343	-0.0137594	-0.0410352	-0.618504	-0.0494457	0.0388288	0.0602767	0.0181299	0.00403254	0.124102	0.19923	0.527828	0.157042	0.541409	0.512129	0.727532	0.0434691	0.060328	0.0364815	0.0343814	0.0957077	0.0811616
KCNMB1	0.0386742	0.167316	0.00450441	-0.135852	-0.109595	-0.117395	-0.727998	-0.0664037	-0.0411889	-0.00519731	0.0527665	0.0414658	0.281161	0.19744	0.26009	0.431972	0.30567	0.378416	0.920462	0.124988	0.186358	0.161059	-0.0238352	0.118855	-0.0474252
CALHM3	-0.190103	0.417286	0.813019	0.172669	-0.0748321	-0.038159	0.149316	-0.0502919	0.00225819	-0.0696372	-0.0378723	-0.0572071	-0.103239	-0.117773	-0.0500967	-0.0769728	-0.0385603	-0.0558902	-0.084591	-0.0720454	0.337975	-0.0068546	-0.029541	-0.00673999	0.242703
GLYATL2	-0.0427396	0.00464354	0.00503459	-0.0693122	0.0125705	-0.142199	-0.464314	-0.0797174	-0.0478636	0.0305364	-0.0231053	0.232554	0.228513	0.131887	0.0556128	0.117851	0.0725746	0.108666	0.399491	-0.0112703	0.0405269	0.014325	-0.0357281	-0.0106598	-0.0265775
RELL1	-0.0670554	0.0722641	0.0509161	-0.00270166	0.061953	0.0221439	-0.0878569	-0.02263	-0.00697575	0.0373644	0.0107411	-0.0339698	0.0552939	0.0483325	0.11315	0.0906384	0.145028	0.976	0.264423	0.041327	0.0282667	0.0594355	0.0438693	0.061586	0.123128
LINC00593	-0.0358992	0.144686	0.0229247	-0.132665	0.135136	0.0292477	-0.758275	-0.0200772	-0.0510955	0.176444	0.0408293	0.0297837	0.318261	0.223603	0.208506	0.297477	0.280857	0.357051	0.940515	0.082153	0.155778	0.215802	0.0434251	0.114264	0.010999
PDE4D	0.742035	-0.172185	-0.150067	-0.199443	-0.180361	-0.1817	0.00723216	-0.196255	-0.216206	-0.12212	-0.196536	0.208742	-0.00593732	-0.113126	-0.127141	-0.120953	-0.147961	-0.14656	-0.076738	-0.134513	-0.176855	-0.187891	-0.0596403	-0.173146	-0.615822
NDUFA10	-0.183463	-0.0232975	-0.0528802	-0.00331018	-0.0421628	-0.0135654	0.231949	-0.0344287	-0.0612817	-0.104285	0.317782	-0.0465149	-0.0519575	-0.0952675	0.0985825	0.326413	0.333573	-0.0020308	0.00202454	-0.00474795	0.125536	-0.038563	0.49484	0.11616	0.196852
TAF2	-0.111734	0.144911	-0.0715512	0.171819	0.19434	0.107667	-0.220683	-0.0821418	-0.051688	0.177307	-0.0557786	-0.137643	-0.0605028	-0.0480042	-0.0183983	0.00993104	0.601779	0.132351	0.176805	-0.0694974	-0.0582355	-0.0874647	-0.0444614	-0.054297	0.122803
TRPM3	-0.004303	0.0417721	0.0356575	-0.0167734	0.0280174	-0.00485117	-0.768342	-0.0216906	0.0020651	0.0602229	-0.0251109	-0.000745056	0.161297	0.24961	0.13045	0.127449	0.135192	0.141827	0.766426	0.0274656	0.0977325	0.0294318	0.0553142	0.0434356	-0.0680766
SLC6A11	-0.0248127	0.186264	0.115813	-0.0345027	-0.0282879	-0.144817	-0.732065	-0.0581639	0.0222388	-0.00408315	-0.0645664	0.0419258	0.364876	0.29685	0.257808	0.35806	0.324093	0.395048	0.96092	0.131914	0.176504	0.188355	0.0574603	0.136219	-0.0136531
RABGAP1L	-0.0243869	0.15467	0.0982884	-0.0622395	-0.0427052	-0.0919655	-0.758951	-0.0340496	-0.0223419	0.0379158	0.0156459	0.0132882	0.279864	0.248371	0.199203	0.299514	0.285928	0.399022	0.943534	0.107828	0.172533	0.156197	0.025721	0.104023	-0.0281302
ZNF655	-0.0918879	-0.0401282	-0.0352275	-0.059914	0.220351	-0.0025612	-0.740563	-0.0637024	-0.0602693	0.036335	-0.0448667	0.185347	0.0498445	0.159792	0.0397362	0.0340774	0.0342312	0.0524587	0.618461	-0.0295846	0.0362072	0.183718	-0.0121738	-0.0373442	-0.019678
SLC9A1	-0.0920328	0.036114	0.0553834	0.0360777	0.0648013	-0.037212	-0.887014	-0.026509	-0.0171297	0.119152	-0.0372254	0.0754477	0.134204	0.220322	0.153885	0.122429	0.132705	0.112893	0.8306	0.0199702	0.0957823	0.0103919	0.0797337	0.0134352	-0.0293094
MCTP1	-0.00548464	0.0548606	0.0550462	-0.10987	0.157677	-0.0596093	0.0396621	-0.0825296	-0.083473	0.00283729	-0.11596	-0.024873	0.0757826	0.518824	0.0199461	0.0499908	0.261598	0.284148	0.152593	0.0279032	-0.0546683	0.0307009	-0.0160976	-0.00500886	-0.0850832
LOC728175	-0.0704135	0.189558	0.107723	-0.0182352	-0.0350091	-0.0947168	-0.646187	-0.0192823	0.004359	0.0669443	-0.00252861	0.0239644	0.358932	0.273555	0.29041	0.403787	0.375651	0.468976	0.92595	0.104375	0.178109	0.192875	0.0292631	0.146032	0.0437208
TRIM7	-0.0419454	-0.0153436	-0.0141699	-0.0370983	-0.104301	-0.118231	-0.173605	-0.116226	-0.105031	-0.0591935	-0.126786	-0.0674465	0.0434953	0.0628393	-0.0256056	0.0139144	0.000224445	0.0101803	0.143766	-0.00156876	-0.0437571	-0.0388272	-0.0318491	0.265128	-0.112975
ARHGAP29	-0.0479677	0.0426295	0.0373137	-0.0189412	-0.0245936	-0.0394974	-0.751003	-0.0379837	0.0173485	0.0663314	0.0339428	0.0145723	0.183512	0.277559	0.159264	0.13246	0.142804	0.165384	0.836237	0.0354382	0.457037	0.0595165	0.0646621	0.142138	-0.00866332
FBN2	-0.0311126	0.185508	0.108345	-0.0692437	-0.045944	-0.0745827	-0.721022	-0.0258142	-0.00282744	0.0444219	-0.0334037	0.0234985	0.340012	0.268413	0.183929	0.374021	0.335952	0.43538	0.956085	0.120908	0.171232	0.18685	0.0297774	0.139035	-0.0014414
IPP	0.16664	-0.0138898	0.031307	-0.179331	-0.169564	-0.119952	-0.191507	0.0576152	-0.034666	0.15619	-0.0868669	-0.102378	-0.0191885	0.0280299	-0.0187012	-0.00551902	0.00526264	-0.00798844	0.311699	0.00703034	0.551568	0.0683271	0.10186	0.289354	-0.0814134
PMS1	-0.151516	0.0230768	0.0034242	-0.0162177	0.00804969	-0.0468542	-0.612427	-0.0797533	-0.0502067	0.0417248	0.4035	0.0452159	0.0281219	0.110866	0.0678873	0.0514607	0.208305	0.385673	0.5869	0.00562483	0.209198	0.0976243	0.0358088	0.0129207	0.115905
RALGPS1	0.0800169	0.114974	0.0471352	-0.0129047	-0.113703	-0.142993	-0.821213	-0.0862626	-0.0324662	-0.0122677	-0.0990534	0.00133545	0.285957	0.237907	0.221855	0.263283	0.244816	0.301084	0.949974	0.0834546	0.15346	0.112905	0.00105203	0.0862408	-0.129905
44441	0.331607	-0.0918371	0.0387395	0.151826	-0.212392	-0.151323	-0.517331	-0.26999	-0.254848	-0.145203	-0.205683	-0.11297	-0.198678	0.0465877	-0.111009	-0.111003	-0.179554	-0.377868	0.160847	-0.086718	0.000120531	-0.257147	-0.0212903	-0.182885	-0.397511
CLCNKB	-0.0203328	0.020013	0.021535	0.00240279	0.0601589	0.0253472	-0.696648	-0.0369403	-0.000896547	0.0946314	-0.000465047	-0.00417118	0.095487	0.189207	0.132607	0.0743499	0.0927052	0.105695	0.644018	0.0323665	0.0929597	-0.00206632	0.0468856	0.0140253	-0.0684922
MTUS2	0.0177838	0.0176801	-0.0324649	-0.025086	0.0510003	0.0061491	-0.712771	-0.0434278	-0.00865392	0.0763085	-0.0250321	-0.0176901	0.125655	0.207271	0.0595547	0.0776219	0.0873464	0.0968267	0.66069	0.0324794	0.073578	0.00572561	0.00526995	0.00810777	-0.132744
INPP5A	0.122049	-0.0702219	-0.0655973	-0.081573	-0.0918378	-0.110537	-0.460306	-0.11187	-0.0822467	-0.0572224	-0.134675	-0.11904	-0.00540225	0.026208	-0.0557302	-0.0265394	-0.055536	-0.0668878	0.274627	-0.0854325	-0.0382335	-0.0981752	-0.0655452	-0.0921926	-0.236009
CD99L2	-0.00524411	0.0475041	0.0441875	0.0232213	0.0670789	0.0353649	-0.721214	-0.00488621	-0.0177725	0.120788	-0.00478184	-0.00573544	0.19941	0.289911	0.157185	0.144156	0.1637	0.244528	0.758796	0.0318744	0.0897471	0.0959413	0.0816446	0.0281252	-0.0297711
SRCIN1	0.118821	0.0203931	0.0343345	-0.125732	0.118445	-0.213757	-0.652849	-0.145596	-0.158371	0.13608	-0.223515	0.100379	0.35564	0.317298	0.0777765	0.133255	0.119231	0.150298	0.766798	0.0676426	0.0553864	0.141893	0.0522998	0.117688	-0.249049
HEATR2	-0.0921343	-0.0364271	-0.0233732	-0.0219716	-0.0665639	-0.0449341	-0.595693	-0.036327	-0.0146925	0.0766567	-0.0821868	-0.0834586	-0.00642842	0.0958229	0.0914815	-2.99575e-05	0.015734	-0.0306408	0.463505	-0.0609832	-0.00918257	-0.066379	0.00402448	0.368606	-0.00933056
UBE2DNL	0.0040318	0.0844783	0.00217312	0.0332847	-0.0261088	-0.112774	-0.663678	-0.0024921	0.0367469	0.10761	0.0173383	0.0129994	0.230007	0.331022	0.189451	0.199808	0.205079	0.227414	0.768701	0.0523538	0.111254	0.0824013	0.0723749	0.0469007	-0.0386329
LINC00301	-0.00618715	0.0552647	0.0379133	0.018507	0.00819761	-0.0278649	-0.860711	-0.0594503	-0.0125433	0.0522291	-0.046927	0.0155511	0.171089	0.242726	0.170448	0.143702	0.149637	0.164649	0.862688	0.0476147	0.118861	0.0286104	0.047088	0.0411262	-0.088482
MAD2L1	-0.00284894	-0.0994974	-0.0927302	0.0540382	-0.121681	-0.0864701	-0.382514	-0.120834	-0.0925433	-0.102277	-0.102806	-0.0914211	-0.0958825	-0.0499301	-0.0964446	-0.104569	-0.105847	-0.143283	0.116559	-0.140069	0.169359	-0.110778	-0.0704142	-0.120771	-0.10102
ZNF785	-0.355503	0.111588	0.394291	0.119326	0.601058	0.185933	-0.324423	0.172436	0.218883	0.072563	-0.0727723	-0.121786	-0.0234248	-0.0198991	-0.0648673	0.00169846	0.0504737	0.459282	0.384966	-0.0901193	-0.0336424	0.138047	0.0102384	0.101395	0.319457
RP11-690I21.2	-0.122899	0.272902	-0.129944	0.267927	0.587076	0.47308	0.325305	-0.049329	-0.0565303	-0.162892	-0.0774809	-0.153172	-0.0978562	-0.159154	-0.237752	-0.207359	-0.177722	-0.128401	-0.41003	-0.132561	-0.161526	-0.0973545	-0.149743	-0.0931667	0.124504
WFIKKN2	-0.098435	0.165735	0.0975235	0.0257906	-0.0307522	-0.02739	-0.662151	0.0115519	-0.00864419	0.119013	0.0304039	0.0435705	0.343086	0.291764	0.259028	0.361982	0.330009	0.405424	0.914001	0.0654798	0.162349	0.200077	0.0182645	0.114975	0.0497061
MINA	0.429008	-0.106357	-0.0235131	-0.135828	-0.164613	-0.113488	-0.370939	-0.190219	-0.150064	-0.119792	-0.191984	-0.146336	-0.0777169	-0.0273503	-0.102632	-0.111549	-0.0809181	-0.123957	0.144564	-0.132156	-0.0761648	-0.135595	-0.127054	-0.143292	-0.386903
ZFP42	-0.119688	0.102693	0.0706081	-0.0528874	-0.0408554	-0.0388222	-0.435777	0.0566093	0.766022	0.00213699	-0.0608729	-0.021097	0.185758	0.125791	0.146303	0.18633	0.186393	0.205712	0.564662	0.011088	0.0999229	0.102776	-0.00701996	0.0552427	0.132049
PHLDB2	-0.00641145	0.0488383	0.0535389	-0.00627687	0.0415533	0.0109441	-0.924311	-0.0357708	0.00272357	0.0952851	-0.0613227	-0.00139688	0.184164	0.277934	0.149458	0.140747	0.160462	0.158128	0.900812	0.039708	0.107227	0.0294761	0.0530727	0.0337917	-0.0976866
PHTF2	-0.12794	-0.0162122	-0.0547034	-0.0467886	-0.00621613	-0.0183658	-0.381256	-0.00481868	0.250296	-0.0881605	-0.00187561	-0.0605707	-0.00311611	0.031598	-0.00679902	0.0138698	-0.0289522	0.00283412	0.264339	-0.0264745	0.0597231	-0.0776067	0.717097	-0.00150653	0.102872
MGC32805	-0.0938243	-0.0925874	-0.0749063	-0.0958127	0.253796	-0.0252788	0.188277	-0.00347482	0.603369	-0.0927003	-0.0869849	-0.0939477	-0.111909	-0.164064	-0.128037	-0.1085	-0.116468	-0.121167	-0.251865	-0.117449	0.103689	-0.0362579	-0.0887189	-0.0688796	0.109291
KLHL30-AS1	-0.141064	0.0828181	0.0685954	0.0582475	-0.0571939	-0.0376729	-0.55028	0.0376151	0.00146529	0.304477	0.0976977	0.063384	0.135073	0.246292	0.524693	0.19755	0.165451	0.146381	0.61908	0.057862	0.108465	0.101394	0.227225	0.0604512	0.122981
ARHGEF2	-0.0239208	0.0512037	0.0638556	0.0133251	0.0147293	-0.0123676	-0.672569	-0.0179769	0.0224632	0.0899461	0.000773682	0.00300897	0.164374	0.250366	0.124462	0.141986	0.150317	0.169785	0.706013	0.0317539	0.0793394	0.025379	0.0598819	0.0482916	-0.0390026
CNTN1	0.050993	0.0797549	0.0251434	-0.107423	0.0144435	-0.0985474	-0.837846	-0.048874	-0.000979709	-0.000615616	-0.0307632	0.0321758	0.234455	0.273922	0.159788	0.211113	0.181697	0.220621	0.891497	0.0866815	0.139899	0.0871946	0.0674746	0.0792207	-0.113995
CCDC82	-0.0390149	0.156289	0.103225	0.0112945	0.0211774	-0.112714	-0.77094	-0.0599451	-0.0110219	0.0134493	0.0109575	0.0111289	0.306753	0.254562	0.195559	0.316315	0.301216	0.364983	0.959591	0.102983	0.263496	0.174608	-0.0425373	0.113806	-0.00278291
CASS4	0.0958379	0.0379921	0.00839636	-0.075249	-0.0580395	-0.083805	-0.619195	-0.0935386	-0.0544182	0.0082599	-0.0656042	0.017579	0.182033	0.157998	0.0214955	0.141521	0.133794	0.180039	0.617279	0.0183359	0.0624718	0.0455332	-0.0203583	0.00445049	-0.157926
STKLD1	0.0463203	0.161081	0.00978478	-0.150169	0.0976658	-0.0870773	-0.733591	-0.115041	-0.101958	-0.0508403	-0.142958	-0.00554323	0.353732	0.316385	0.137976	0.346279	0.297198	0.399841	0.906825	0.143146	0.163891	0.167906	0.134145	0.152499	-0.0822732
PDE8B	-0.0162808	0.00820887	0.0111876	-0.0170599	0.0464931	-0.0138064	-0.561374	-0.0341892	-0.000982084	0.126513	-0.013973	0.00547836	0.0994411	0.161568	0.100191	0.0916475	0.0865458	0.102595	0.565499	0.0318367	0.0416303	0.00568201	0.0199827	0.0198451	-0.079018
KANSL1L	-0.341346	0.574664	-0.0570429	-0.0711132	0.236767	0.08994	0.260249	0.59488	0.194068	0.114073	-0.0181442	-0.105664	-0.130607	-0.181215	-0.130925	0.0527414	0.110777	-0.0550975	-0.204703	-0.079646	-0.040091	-0.0196911	0.155951	-0.018611	0.442865
UBE3C	-0.00235966	0.0396624	0.0135047	-0.0500638	-0.0181577	-0.0382386	-0.955037	-0.0835011	-0.0297858	0.0374105	-0.0351558	-0.00431296	0.159994	0.280623	0.0586807	0.12682	0.134637	0.123021	0.888916	0.0222098	0.15703	0.0267903	0.0661349	0.0227781	-0.118268
FBLIM1	0.0989575	-0.0882068	0.140612	-0.131088	-0.040374	0.29202	0.257611	0.051482	0.101823	0.117856	-0.126607	0.0355884	0.180144	-0.0289064	0.0666001	-0.0635719	-0.0759041	-0.207436	-0.296981	-0.0545693	-0.590612	-0.173699	-0.202264	-0.0926975	-0.164304
DPP6	-0.0463243	0.121312	0.0837829	-0.069005	0.0121848	-0.0691545	-0.706229	-0.0202272	-0.0249015	0.133284	-0.0257722	0.0214732	0.313656	0.319847	0.209527	0.365297	0.274554	0.314981	0.912049	0.069423	0.112487	0.169188	0.0617656	0.0793876	-0.0394666
SYT16	0.0103928	0.112118	0.0667653	0.0354144	-0.0833648	-0.113008	-0.808851	-0.0505045	0.00420369	-0.000508696	-0.0869361	-0.00294805	0.279554	0.301352	0.157779	0.261359	0.220206	0.307952	0.927522	0.0733547	0.127958	0.113153	0.00790057	0.079443	-0.0912721
SNED1	-0.0251584	0.0684552	-0.0126793	0.0416992	-0.189377	-0.213013	-0.732255	-0.0352454	0.0281788	0.14973	0.0424626	0.0713802	0.258231	0.290373	0.184377	0.235366	0.188139	0.234815	0.816572	0.0707961	0.129681	0.0668733	0.0617176	0.0550248	-0.0536547
RAB39A	0.00802077	0.0242144	-4.08399e-05	-0.0605971	0.00796211	-0.0379543	-0.141808	-0.0144514	-0.00313846	-0.0167071	-0.110336	-0.0435204	0.951044	0.176637	0.0337924	0.08187	0.0902464	0.127805	0.306861	0.0386653	-0.0425896	0.0140719	-0.0107702	-0.0103907	-0.134456
FNDC9	0.0146448	0.10348	0.0264017	-0.113641	-0.112299	-0.13229	-0.804414	-0.0742991	-0.077127	0.112544	-0.0837086	0.0293301	0.233932	0.259845	0.204311	0.207322	0.207869	0.30888	0.833167	0.0616647	0.139233	0.0902049	-0.0346917	0.0413797	-0.10402
TRIM72	-0.198732	-0.0271366	-0.0130677	-0.0293512	-0.000454085	0.0500713	-0.00269532	0.733565	0.685247	-0.03665	-0.0308153	-0.0487219	-0.00213549	-0.0139747	-0.0281723	-0.0288361	-0.0343773	-0.0492323	0.0585058	-0.0533465	-0.051057	-0.00864893	-0.0226187	-0.0421025	0.234174
FBXO8	0.561042	-0.242016	-0.0665467	0.0829888	-0.247301	-0.316608	0.200266	-0.34598	-0.152073	-0.0757957	-0.319654	-0.0873	-0.132036	-0.0639157	-0.0846884	-0.11728	-0.150248	-0.54881	-0.321669	-0.278823	-0.143615	-0.190066	0.129874	-0.00594011	-0.533615
SPIRE1	-0.31841	-0.0909713	-0.0711789	0.455969	-0.137407	-0.108729	-0.0335122	0.014024	-0.118172	-0.0456203	0.216599	0.0279417	-0.109486	0.119541	-0.0553917	-0.103183	-0.0819488	-0.103422	-0.0589016	0.0333373	0.133268	-0.0182229	0.55815	0.368856	0.281312
ACP1	0.499869	-0.0399484	0.0565647	-0.101047	-0.0793873	-0.0616803	-0.152179	-0.110419	-0.0833414	-0.0515017	-0.12442	-0.080084	0.011843	-0.00237394	-0.0273803	-0.0228994	-0.0126068	-0.0126061	0.135961	-0.043682	-0.0593886	-0.0686405	-0.0680507	-0.0479776	-0.332472
LOC389199	-0.00795015	0.024958	-0.0257454	-0.176633	0.0167209	-0.0714743	-0.599008	-0.0577465	-0.0751907	0.216904	-0.174525	-0.0796558	0.204316	0.305108	0.115858	0.164307	0.24061	0.241925	0.672134	0.289591	0.0320196	0.0110515	0.13692	0.139714	-0.106758
PLA2G4C	-0.177891	-0.0298499	-0.027135	-0.0571675	0.492786	0.393223	-0.217589	0.116889	-0.036552	-0.032951	-0.177782	-0.078267	0.55508	0.0671455	-0.114814	-0.0293989	-0.010641	0.0184107	0.187056	-0.0450625	-0.0962576	-0.0537459	-0.0266574	-0.0389271	0.0275706
CLDN20	-0.133172	0.0767388	0.840204	0.075717	-0.0232097	-0.00730095	-0.389492	-0.0694617	0.0113629	0.020804	-0.122822	-0.0269701	0.124492	0.114957	0.101413	0.0998222	0.119158	0.120257	0.459937	-0.0191763	0.073546	0.0283649	0.0139805	0.00521657	0.0696952
UBE2O	0.362954	-0.0580953	-0.0584538	-0.131794	-0.121962	-0.0890655	-0.196054	-0.113545	-0.0920585	-0.0455875	-0.154402	-0.103527	0.0652165	0.0235062	-0.0312658	-0.00423171	-0.017807	-0.0094442	0.184546	-0.0544763	-0.0543943	-0.0751478	-0.0846514	-0.0699657	-0.388504
ASTN2	0.0305731	0.141638	0.0433182	-0.154457	-0.035245	-0.0494968	-0.825139	-0.0428547	0.000699716	0.0437342	-0.0196888	0.0202758	0.295766	0.262788	0.228743	0.296462	0.267319	0.331118	0.970432	0.114449	0.163409	0.143407	0.0318	0.0986351	-0.0759038
DZANK1	-0.0225222	0.0969625	0.0545338	0.0105419	0.0459814	-0.0734634	-0.755828	-0.0483324	-0.00166052	0.145206	-0.0385359	0.0153315	0.246349	0.342567	0.218505	0.213157	0.226061	0.246667	0.875425	0.077609	0.124443	0.123002	0.0638525	0.0905084	-0.0366663
ITGA11	-0.111784	-0.0279824	-0.0293331	-0.0201456	0.0623979	0.527913	-0.431634	0.00651081	-0.063655	-0.0333709	-0.129496	-0.082523	0.0178118	0.0566685	-0.0199071	-0.00665307	0.0156447	0.0123079	0.32817	-0.075106	-0.0190746	-0.0323144	-0.0970942	-0.0524159	-0.0176357
AGBL3	-0.00945381	0.100345	0.0853867	0.0107728	0.0273051	-0.0528705	-0.832389	-0.0105582	0.0409283	0.042578	-0.0510465	0.039578	0.250873	0.2751	0.160106	0.221827	0.216292	0.246443	0.934991	0.0752204	0.136522	0.0991122	0.0434094	0.0730474	-0.0469939
ZBED1	-0.394603	0.151001	0.120599	0.209913	0.304955	0.392368	0.38562	0.452796	0.412451	-0.0743888	-0.059017	0.141743	-0.232496	-0.338562	-0.282494	-0.210471	-0.0197477	-0.281452	-0.403319	-0.173431	0.107966	-0.234202	0.0783833	0.00981178	0.447625
ZNF585A	-0.138668	0.0211488	0.0156584	-0.000844638	-0.0237413	0.0465271	-0.274844	0.0617716	0.83091	0.249378	-0.0903943	-0.012686	0.0514483	0.0608639	0.0627594	0.0427802	0.0503044	0.0365796	0.295013	-0.0449449	0.0339208	0.0167301	-0.0680924	-0.0212644	0.132039
ADCY7	-0.0771477	0.173819	0.0923617	-0.0607804	-0.052153	-0.0969281	-0.632012	-0.0418675	-0.0314534	0.067276	0.00426356	0.0482075	0.381186	0.260067	0.287413	0.375863	0.348089	0.425606	0.898736	0.156582	0.193687	0.184564	-0.0151179	0.118989	0.0128053
PDGFRA	0.0371968	0.094918	0.0780784	-0.12298	0.0301766	-0.158773	-0.688582	-0.0304839	-0.0804991	0.143861	-0.0018323	0.00832508	0.303189	0.324597	0.280121	0.342131	0.301405	0.387095	0.908654	0.0980538	0.155186	0.156548	0.0371672	0.101035	-0.0700046
STEAP3	-0.272878	0.129357	-0.0438858	0.358147	0.0363442	0.0721457	0.19882	0.00503392	-0.223049	-0.213064	0.280686	-0.0542251	0.211411	-0.111404	-0.126622	0.0436561	-0.0167382	0.20637	-0.103351	0.00726737	0.238703	0.0226894	0.470955	0.321401	0.34365
MCTP2	-0.105108	-0.115503	-0.120186	-0.103996	0.0737943	0.423618	0.176494	-0.0410645	-0.121992	-0.148803	-0.121521	-0.156353	-0.111854	-0.133756	-0.134739	0.364658	-0.114855	-0.106519	-0.180694	0.445352	-0.109179	-0.0744683	-0.120545	-0.0643327	-0.000823928
RASSF5	-0.0452464	0.0353489	-0.0766055	-0.190463	0.0394215	-0.00305619	-0.686204	-0.044144	-0.124723	0.103629	0.0347235	0.0561335	0.142664	0.249706	0.162535	0.129688	0.125443	0.142235	0.632884	0.0284081	0.0780528	0.041692	0.0293991	0.0220754	-0.0575437
B3GNT5	0.608534	-0.216949	-0.201123	-0.189688	-0.234286	-0.199889	-0.0983409	-0.247846	-0.191048	-0.158643	-0.187512	-0.196353	-0.113162	-0.0791901	-0.172495	-0.137759	-0.202706	-0.224099	-0.117704	-0.200489	-0.134168	-0.225972	0.109381	-0.153665	-0.549884
USP36	-0.0789244	0.115204	0.0860796	0.0496393	0.0613356	0.0225756	-0.686144	0.00736914	-0.013587	0.118365	0.0301765	0.00308794	0.282879	0.310629	0.174908	0.288663	0.267696	0.342917	0.886293	0.0658992	0.204793	0.144351	0.0644759	0.0812948	0.0364499
CIDECP	-0.2707	0.377247	0.043455	-0.00550302	0.0379145	-0.00817065	-0.276725	-0.0173843	0.0861015	0.466839	0.0260195	-0.0130115	0.0492732	-0.0669539	0.285277	0.150212	0.607965	0.121953	0.37938	0.00260288	0.0644562	0.0808857	0.0351265	0.225277	0.31296
LOC280665	-0.0194081	0.0203284	0.025072	-0.0575333	0.0783887	0.0339845	-0.688273	-0.0337089	-0.00814939	0.069867	-0.0183887	0.03225	0.109986	0.17441	0.0925975	0.0801109	0.0912215	0.0824331	0.636279	0.00367052	0.101903	0.00854261	0.0399877	-0.00311368	-0.0661847
MTHFD2L	-0.11056	0.0159368	0.163571	-0.0252708	0.185025	0.00578361	-0.635769	-0.0757929	-0.0457836	0.0247798	-0.0619762	-0.0867432	0.0415143	0.0983977	0.0474913	0.0391643	0.0718515	0.237228	0.541333	-0.0260319	0.0504966	-0.0112999	0.219706	-0.00153947	0.0196766
SLC12A1	0.0162744	0.0565392	-0.0676774	0.0117437	-0.0758374	-0.125391	-0.703829	-0.105241	-0.0565471	0.109692	-0.0290524	0.00278213	0.666345	0.315471	0.179965	0.163127	0.150636	0.210132	0.78005	0.0604266	0.0338909	-0.00512435	0.0766327	0.11852	-0.138968
CCDC158	0.0187786	0.144295	0.0820488	-0.197531	-0.0284674	-0.049044	-0.767155	-0.00992689	0.0243282	0.101363	-0.0157477	0.041756	0.303427	0.238874	0.238308	0.308237	0.274302	0.360062	0.96029	0.106504	0.162329	0.158715	0.0307501	0.102965	-0.0507314
ATP6V1B1	0.0714311	-0.054348	-0.0369332	-0.0732746	-0.0291362	-0.0334746	-0.430081	-0.0788567	-0.0652392	0.284425	-0.088104	-0.00307992	0.207795	0.642825	0.0649711	0.0691679	0.0326602	0.0838818	0.418395	0.0214896	-0.0798484	-0.0304248	-0.0364551	-0.0480567	-0.237868
TOR1A	-0.115121	0.0539529	-0.0028686	0.0160772	-0.0198997	-0.00323491	-0.0113053	0.00634905	0.0422809	-0.00219454	0.0689409	-0.0534366	0.0184519	0.0169249	0.055924	0.0686145	0.972708	0.0824952	0.117072	0.0103326	0.00692681	0.0180215	-0.00264334	-0.00475476	0.168594
VWA5B2	-0.0751659	0.308569	0.0355998	0.00486214	0.0348185	-0.077144	-0.452507	-0.036651	-0.00336111	0.0838138	-0.157336	-0.0666655	0.150931	0.199641	0.112511	0.167196	0.133153	0.198131	0.598131	0.0478454	0.100866	0.598072	0.00862941	0.0475532	0.0742956
KIAA1257	-0.364125	-0.0428146	-0.00444934	0.133079	0.623052	0.468803	0.308571	0.0446562	0.0382597	-0.121468	-0.0734832	-0.160062	0.0813488	-0.166434	-0.135535	0.0634763	-0.0743036	0.19175	-0.220738	-0.0471339	-0.0988875	0.178697	0.11142	0.560332	0.396544
CYP2U1	0.00781935	0.0855682	0.0646103	-0.0755102	-0.0277506	-0.0914607	-0.892714	-0.0307387	-0.0170778	0.085892	-0.0629312	0.0284182	0.262058	0.308772	0.157045	0.237581	0.214715	0.316422	0.965856	0.0840655	0.145499	0.079764	0.0738773	0.0587519	-0.0842906
PARK2	0.000290437	0.0914001	0.0478063	-0.0341261	-0.0188749	-0.0818655	-0.830668	-0.0602384	-0.0272571	0.0255218	-0.0613361	-0.00969759	0.236811	0.235737	0.15562	0.23076	0.192634	0.243953	0.886861	0.065668	0.139656	0.0936685	0.0684756	0.074563	-0.0795568
ELMO2	-0.139489	0.152336	0.123641	-0.226846	0.0521989	0.050156	-0.708747	0.0308169	0.0809088	0.156333	0.0219396	0.0384883	0.284053	0.287954	0.180236	0.337444	0.267327	0.343245	0.868671	0.0989559	0.18635	0.188388	0.117334	0.133926	0.0882739
PTPN7	0.00776003	0.0376422	0.00855513	-0.0546392	0.0560267	-0.0408647	-0.722118	-0.0807641	-0.049379	0.00711536	-0.079619	-0.00594857	0.216156	0.276877	0.123831	0.210088	0.154563	0.230582	0.765179	0.0522825	0.0984785	0.0447204	0.0843035	0.0396587	-0.0951079
CMAHP	-0.00839992	0.139967	0.0739507	-0.106159	-0.00606709	-0.154564	-0.657788	-0.044459	-0.0188102	0.0859646	-0.0702659	0.0202251	0.307941	0.273355	0.160742	0.316567	0.269197	0.374694	0.883096	0.120082	0.144863	0.168204	0.0521679	0.14357	-0.0457345
DOK5	-0.128067	0.014082	0.488398	0.0198472	-0.0732212	-0.0797391	-0.0835259	0.0944517	-0.0498227	-0.0324157	-0.0339508	-0.0510613	0.0185777	-0.0245553	-0.0268702	0.0399705	0.0158149	0.0413597	0.155799	0.824005	0.006753	0.0257053	-0.0518835	0.0173703	0.0905972
SDC3	-0.0186776	0.0311587	0.0545881	0.0622536	0.0582381	0.0404675	-0.555881	0.0253607	0.0607409	0.10489	0.00689662	0.00433765	0.146138	0.242816	0.120046	0.0947323	0.122503	0.100279	0.596441	0.0145032	0.0617915	0.0321029	0.0665789	0.0122389	-0.0150498
TMEM135	-0.0381582	0.131868	0.115748	-0.042173	0.0852763	-0.0494315	-0.794629	0.0224316	0.074698	-0.0102757	-0.0817623	0.00325637	0.261679	0.278162	0.248869	0.26536	0.26327	0.300681	0.950133	0.102307	0.159842	0.12762	0.118323	0.106115	0.0022139
PRR16	0.12047	-0.0393653	-0.0927426	-0.147939	-0.117337	-0.200522	-0.118513	-0.127219	-0.0445916	0.231767	-0.0011929	0.0419931	-0.035359	0.182947	0.706347	0.340449	0.00280172	0.00520143	0.0974412	-0.0431269	-0.0622197	-0.0469258	-0.0964878	-0.0801398	-0.0732509
PCNP	0.590343	-0.198535	-0.227879	-0.255675	-0.200717	-0.233129	-0.54609	-0.405089	-0.241809	-0.103159	-0.178603	0.0149279	-0.165567	0.136027	-0.0816399	-0.0132799	-0.196329	-0.194316	0.258717	-0.225462	0.0556888	-0.180729	-0.0658849	-0.164084	-0.595182
WDR37	-0.00275539	-0.0478986	-0.115891	-0.0655162	0.0192418	0.646254	0.0530828	0.139373	-0.0596043	0.275545	-0.0840416	-0.0268728	-0.0677917	-0.142409	-0.105401	-0.0683481	0.344114	-0.0585307	-0.0704919	-0.0825548	-0.0863471	-0.0786058	0.0872732	-0.0672541	0.0813327
HMGCLL1	-0.0726544	0.0812241	0.0198013	-0.0121779	0.0088481	-0.122519	-0.402482	-0.0592991	-0.0343	0.102851	0.027982	-0.00373751	0.146952	0.176968	0.163716	0.688323	0.179056	0.236512	0.60029	0.088161	0.0710467	0.0608107	0.055185	0.164811	0.0581147
CSPP1	-0.030527	0.0252668	-0.0240133	-0.107621	0.00965021	-0.0393087	-0.75657	-0.101826	-0.0293288	0.125593	-0.0686248	-0.0261799	0.146419	0.192216	0.067939	0.128625	0.109392	0.16392	0.73875	0.0174504	0.0741197	0.00461667	0.0282431	0.0916229	-0.101202
MITF	0.134253	0.0745055	0.0506714	-0.0525159	-0.0619099	-0.13412	-0.719491	-0.0929146	-0.0547395	0.0245516	-0.0728883	0.386524	0.208008	0.205033	0.145986	0.204213	0.182605	0.233989	0.816575	0.0532128	0.0961648	0.0695286	-0.0319653	0.0444789	-0.140769
CAMKMT	-0.158201	-0.00755065	-0.044877	-0.0151301	-0.0877217	-0.0549852	-0.0101106	-0.0262463	-0.0535525	-0.0657181	0.914953	0.188796	-0.0749388	-0.0919115	-0.0399665	-0.0286666	-0.0224471	-0.00738193	-0.00949656	-0.0151544	0.044388	-0.000251549	-0.0272039	0.00923902	0.181775
S100Z	-0.122765	0.0964147	0.0650138	-0.0110913	0.00670447	-0.00597536	-0.618064	-0.0245954	0.00818945	0.019054	-0.0134134	0.0055186	0.279955	0.218984	0.182385	0.180847	0.194829	0.416849	0.767957	0.0471872	0.10116	0.121277	0.0474916	0.0680574	0.0251635
ABCD3	0.237315	-0.249391	-0.245523	-0.257214	-0.182557	-0.0274831	-0.482219	-0.209202	-0.0625089	-0.198684	0.0378076	-0.122468	-0.153179	0.0470409	-0.096669	-0.0679883	-0.262195	-0.192722	0.341835	0.145525	0.244926	0.12454	0.0906201	0.153791	-0.283648
DKFZP434K028	0.0317997	-0.0801196	-0.0737348	0.0647237	-0.0640487	-0.0649038	-0.227984	-0.0956491	-0.106165	-0.0381394	-0.10941	-0.00743888	0.0815175	0.801853	-0.0195109	-0.0187255	-0.0345576	-0.0169296	0.122085	-0.0150323	-0.0952593	-0.0565413	-0.0537131	-0.0743714	-0.232997
ERCC8	0.0052404	0.0519954	0.00980322	-0.0772156	-0.0691684	-0.110911	-0.747451	-0.0941539	-0.00565754	0.0273226	-0.00744173	0.0346934	0.148077	0.194583	0.629468	0.167459	0.183109	0.159795	0.776272	0.0297761	0.0999546	0.0379439	0.0445448	0.0251609	-0.071262
MLXIP	-0.0202494	0.0311779	0.0263083	-0.0145136	0.0281557	-0.0229708	-0.445088	-0.0133481	0.00237311	0.120642	-0.00512228	0.00134289	0.112136	0.151062	0.119004	0.120605	0.111452	0.223003	0.51752	0.0543783	0.0448274	0.0567373	0.0350283	0.0410917	-0.0387599
LOC101927746	-0.046789	0.0681129	0.0403607	-0.00884658	0.279587	-0.0285671	-0.788418	-0.0213456	-0.00283079	0.105621	0.00935077	0.00320821	0.201741	0.293295	0.15727	0.167482	0.182825	0.22787	0.850018	0.0795556	0.139457	0.0922009	0.0935601	0.103175	-0.00142983
TIA1	0.0029838	-0.0184079	-0.0113937	-0.0671808	-0.000362909	-0.0171638	-0.761095	-0.0916779	-0.0497885	0.023091	-0.064242	0.237415	0.116657	0.156603	0.0509987	0.0694141	0.0514853	0.0688076	0.658263	-0.0206585	0.0885777	-0.0085643	-0.0567069	0.0173519	-0.121892
LOC101927129	-0.0480457	0.0597998	0.0439903	0.0261841	0.024689	-0.00758626	-0.602026	0.00566107	0.0322339	0.0740129	-0.00326491	0.0732453	0.188937	0.24934	0.136801	0.157078	0.162052	0.172293	0.706615	0.0481719	0.153774	0.316033	0.064224	0.0435838	0.0447889
MS4A3	-0.0417341	0.0882165	0.038275	-0.074465	0.0171436	-0.0793647	-0.675471	-0.0657183	0.00257763	0.110892	-0.0196068	0.0217458	0.200839	0.227003	0.185637	0.207621	0.190348	0.283214	0.800181	0.0843985	0.119447	0.0870127	0.0484365	0.0975829	-0.0446382
PCBD2	-0.0632343	0.0597646	0.0859065	0.0233388	-0.0711818	-0.224872	-0.70867	-0.0884265	0.159236	-0.055813	-0.134014	-0.121923	0.0366257	0.17711	0.146384	0.0584646	0.168839	0.01166	0.585474	-0.121794	0.125934	-0.0687997	0.343736	-0.227894	-0.0490466
FCER1G	-0.173441	-0.0315852	-0.0515167	-0.0254101	-0.067703	-0.0735739	-0.204334	-0.047551	-0.0602714	0.0483689	0.799718	0.173184	-0.058298	-0.0267821	-0.0335646	-0.0322128	-0.0274585	-0.0123936	0.117264	-0.0378289	0.0435332	-0.0176172	-0.0139762	-0.0190594	0.151287
GAFA1	-0.102459	0.167834	0.0920668	-0.222641	0.0348895	0.0310899	-0.486838	0.0133901	0.0535958	-0.143963	0.031026	0.00465382	0.245032	0.0845745	0.244225	0.342535	0.265364	0.397439	0.767983	0.137573	0.175367	0.322985	0.0866964	0.167179	0.102085
FRMD8	-0.0953587	0.0491982	-0.0478291	-0.0285704	-0.0365095	-0.0562711	-0.301461	-0.0299304	-0.00393863	0.0199651	-0.0076699	-0.046515	0.19429	0.151644	0.154501	0.167936	0.945475	0.174628	0.431886	-0.0035181	0.0793243	0.0567677	-0.0125179	0.00374325	0.0761979
MPHOSPH6	-0.34384	0.471697	0.114408	0.272178	0.0578076	0.145821	-0.000881373	0.0485722	0.100226	-0.201967	0.141503	0.037056	0.0729193	-0.0358499	0.0113217	0.0495584	0.105138	0.199226	0.113134	0.0627235	0.0903903	-0.221001	0.228482	0.149216	0.335267
HYDIN	0.0556927	0.126355	0.0864383	-0.141759	0.019105	-0.153288	-0.812594	-0.0298904	-0.0039921	0.0930029	-0.0400481	0.0184933	0.297311	0.319098	0.154201	0.281882	0.265072	0.305887	0.941056	0.103916	0.150223	0.137332	-0.0132787	0.090148	-0.100804
CCDC36	0.14644	0.007502	-0.0313098	-0.214875	0.0464881	-0.149849	-0.748931	-0.0560358	-0.146129	-0.102144	-0.153034	-0.0303681	0.226543	0.27214	0.0428355	0.188653	0.191575	0.235707	0.762999	0.07565	0.125435	0.0685315	0.0725801	0.0449766	-0.217917
PRKD3	0.0342492	0.0432932	0.0126658	-0.000380341	0.00125542	-0.0946119	-0.918136	-0.107043	-0.0574193	-0.00547355	-0.0935885	0.00134755	0.1938	0.266667	0.0875494	0.15869	0.144837	0.193179	0.865812	0.0180341	0.104749	0.0232958	-0.00964314	0.0267457	-0.139108
ABCC11	-0.139745	0.176448	0.0743668	0.00629358	0.0726129	-0.085286	-0.621721	-0.01607	0.00894998	0.0487429	-0.0376415	-0.0155756	0.353624	0.289884	0.239252	0.375204	0.290049	0.560435	0.882486	0.0847681	0.160444	0.19792	0.279454	0.15069	0.0937912
ESYT3	-0.15029	0.0687736	0.0960691	4.05918e-05	-0.052763	-0.0579062	-0.405721	-0.0355819	-0.0167593	0.0238695	-0.000818546	-0.0553889	0.0791286	0.126894	0.0870816	0.14876	0.114155	0.268491	0.546883	0.134332	0.228203	0.056494	0.122161	0.806006	0.161153
PLA2G4D	-0.0116391	0.130142	0.0366025	-0.109384	0.0465091	-0.0255988	-0.75585	-0.0515479	0.0034147	0.0876314	-0.0571412	0.00913472	0.285432	0.27767	0.186882	0.347781	0.274525	0.37661	0.917773	0.0855856	0.145793	0.174748	-0.0121359	0.0962175	-0.0468152
PDE12	-0.443743	0.443037	-0.00259646	-0.0363931	0.123914	0.142519	-0.107327	0.109274	0.00561231	0.0561114	0.102782	-0.0717922	-0.0104202	-0.104667	0.061153	0.300095	0.226884	0.325054	0.291122	0.18167	0.314924	0.269875	0.32154	0.176736	0.532856
JRK	-0.291225	0.0443403	0.394474	-0.000779263	-0.0964371	-0.0754918	-0.0616242	-0.0183404	-0.0138039	-0.05877	0.692517	0.0627306	-0.0304737	-0.0571306	-0.0164731	0.0519743	0.0484658	0.0752649	0.186032	0.00755283	0.171641	0.0522472	0.375608	0.392721	0.33029
ABCC4	-0.185492	-0.0356781	-0.0449068	-0.0480748	-0.0780055	-0.104356	0.0292286	-0.0264954	-0.0200564	-0.0467982	0.417205	0.305152	-0.0883072	-0.0627242	-0.022678	0.00628976	-0.0479731	-0.0508829	0.0251011	-0.0344748	0.899396	0.0514586	-0.0104752	0.0187953	0.242209
C7orf63	0.262702	-0.101247	-0.0843202	-0.180007	-0.0923142	-0.142607	-0.458784	-0.175891	-0.138746	-0.00963054	-0.0879127	-0.00603686	0.0163482	0.0460388	0.284936	-0.0350041	-0.0394597	-0.0636606	0.302055	-0.101737	-0.040765	-0.100219	-0.0906735	-0.142215	-0.31272
SCEL	0.00706497	0.0299881	0.020474	-0.0429091	-0.00916193	-0.0525263	-0.960594	-0.0815023	-0.0275345	0.0360465	-0.0668014	0.0459206	0.180716	0.238245	0.117184	0.122607	0.122883	0.134828	0.893464	0.023648	0.127127	0.00593281	0.037561	0.0475826	-0.123943
ZNF678	0.0149944	0.0645966	0.022878	-0.0405494	-0.0259052	-0.0486223	-0.871476	-0.0591459	-0.0106038	0.036364	-0.0609743	-0.00681005	0.181652	0.261367	0.114974	0.140921	0.150141	0.155968	0.876746	0.0412443	0.123141	0.0686111	0.0480466	0.0912053	-0.0973513
ANKS6	-0.203144	0.0375976	-0.0104717	-0.0196725	-0.0329656	0.0333769	-0.0435115	0.482811	0.00688905	-0.00573613	0.036859	-0.0601965	0.0344595	0.0246874	0.033092	0.786739	0.216783	0.0865032	0.255219	0.316396	0.0259302	0.0356358	-0.00202661	0.0306345	0.267579
LINC00598	0.126776	0.144698	0.0685283	-0.112174	-0.179555	-0.14042	-0.718187	-0.0729609	-0.0267681	0.0276142	-0.0885786	0.00810582	0.357068	0.294551	0.19893	0.330233	0.287313	0.387995	0.919495	0.102937	0.143094	0.146184	0.0120681	0.0890994	-0.154901
SIK3	-0.0661274	0.132457	0.0823498	0.0308916	-0.00492508	-0.0461401	-0.846564	-0.00305471	0.0143094	0.0728643	0.026392	0.0149377	0.271846	0.279289	0.209027	0.299282	0.283379	0.322608	0.976185	0.0914276	0.171183	0.126527	0.0939599	0.0938797	0.0135254
FUT8	0.622606	-0.254477	-0.22315	-0.268771	-0.240586	-0.135529	-0.462614	-0.275619	-0.246014	-0.145277	-0.260409	0.0401791	-0.0789918	0.0236813	-0.146556	-0.17305	-0.207448	-0.233638	0.181157	0.0245011	-0.103439	-0.266886	-0.19569	-0.107625	-0.661024
ZSWIM2	0.0184262	0.0812909	0.0611238	-0.0323656	-0.0242519	-0.0377149	-0.895763	-0.0579178	0.00664987	0.108213	-0.0383601	0.0120474	0.236315	0.289856	0.182067	0.214832	0.206453	0.249464	0.961191	0.0732897	0.127732	0.0773791	0.032296	0.0643309	-0.104051
PSIP1	-0.13215	0.00616572	0.0235274	0.378173	0.173398	0.278025	-0.500072	-0.0246674	-0.0501994	0.0371082	-0.0758378	-0.0259724	0.195885	0.166299	0.0785635	0.0256809	0.0969023	0.492357	0.591064	-0.0248692	0.0139975	0.00480896	-0.00895251	0.0100547	0.0165839
RCBTB1	-0.165849	0.00605729	0.000714922	-0.0695418	0.192667	0.02392	-0.0730409	0.0375259	0.891393	-0.053861	-0.074926	-0.057994	0.0372182	-0.0262786	-0.106441	0.0176447	0.000444279	0.0204241	0.106351	-0.0341023	0.0103868	0.00969315	-0.0239507	0.0108449	0.178594
EXOC3L1	-0.108338	0.194854	0.127202	0.00349163	-0.0370832	-0.0367454	-0.656042	-0.00815247	-0.00379867	0.0724665	0.00384886	0.00724631	0.356176	0.249668	0.251177	0.438115	0.339341	0.459957	0.89687	0.0689475	0.152738	0.205432	0.0583983	0.108719	0.072058
ACOT11	0.0315096	-0.0254619	-0.0409664	-0.00587263	-0.121321	-0.0733605	-0.422201	-0.0760221	0.0660091	0.0129996	-0.084387	-0.101424	0.0645418	0.264631	0.279138	0.0440556	0.059991	0.0192855	0.410961	-0.0364658	-0.0175439	-0.0120041	-0.0261345	-0.0438254	-0.150781
LOC388882	-0.0104451	0.0592308	0.0635305	0.0303586	0.0217965	-0.00869528	-0.583881	0.0292031	0.0247341	0.0794395	0.0253144	0.383628	0.188175	0.295717	0.143833	0.169426	0.168924	0.173881	0.698871	0.0439467	0.0824425	0.0668582	0.0421145	0.0350935	-0.00118884
KLHL14	0.00607894	0.0231979	0.020872	-0.0211438	0.0196321	-0.0286046	-0.939138	-0.0568613	-0.0110641	0.0885802	-0.0328767	0.0303443	0.162201	0.257887	0.135095	0.118049	0.122236	0.126775	0.86587	0.0220306	0.0951488	-0.00131731	0.0500919	0.0235535	-0.11455
VIL1	0.119087	0.1379	-0.202801	-0.238757	0.247726	0.283064	0.470251	0.282615	0.167976	-0.000590738	0.190132	-0.144908	-0.139458	-0.398335	-0.232828	0.0167195	-0.112295	-0.0853656	-0.386666	-0.188372	0.105672	-0.111261	-0.135408	-0.143217	0.0981028
LINC01234	0.286916	-0.00222087	-0.0291882	-0.114107	-0.0252283	-0.0426773	-0.524836	-0.0756286	-0.0569009	0.0161249	-0.0840473	-0.020559	0.115604	0.0598255	0.0286744	0.0966021	0.0766378	0.230913	0.540592	-0.00797062	0.0358974	0.00360262	-0.0224731	-0.00482029	-0.172179
ACAT1	-0.0043101	0.122685	0.08428	-0.00301597	-0.0992365	-0.0733081	-0.853345	-0.0404351	0.00576521	0.0504569	-0.0452511	0.0146895	0.272446	0.236077	0.212889	0.269785	0.245402	0.299185	0.973756	0.0895391	0.157274	0.117365	0.0578507	0.0933152	-0.0562184
LOC554174	-0.111642	0.073148	0.00242308	0.0247247	0.0505769	-0.0316033	0.00350039	0.0247075	0.0514547	0.0256047	-0.0128164	-0.0830782	0.525107	0.137355	0.0909072	0.096311	0.779638	0.244576	0.219868	0.0390104	-0.0100315	0.286356	0.0125757	0.0169033	0.149867
ACAN	-0.0550105	0.0509819	0.00125505	-0.105887	-0.0284934	-0.135466	-0.204552	-0.0873708	-0.0920618	0.0207245	-0.0503109	-0.0606209	0.131061	0.266038	0.0703883	0.172719	0.130887	0.26616	0.396976	0.0595391	0.0682482	0.0595041	0.624094	0.0877574	-0.0331088
BC070490	0.0117544	0.0895255	0.0912763	0.0469418	-0.00510224	-0.122583	-0.871554	-0.0430029	0.0366589	0.0797471	-0.108698	-0.0240641	0.24838	0.325368	0.11116	0.208231	0.190351	0.219842	0.926358	0.0439979	0.138916	0.0799219	0.0918859	0.051688	-0.0899666
NLRP12	-0.107583	-0.0219788	-0.0192527	-0.0138451	0.0598173	-0.047746	0.0338906	-0.0493696	-0.0443062	-0.0505028	-0.0085055	-0.0495217	-0.0145443	-0.0426276	-0.038618	0.0139409	-0.0140837	0.0136993	-0.00962773	0.978172	0.0123943	0.0324191	-0.0207708	0.0492972	0.0780807
C21orf90	-0.0210488	-0.00360974	-0.00437151	-0.0241041	-0.0347153	-0.00680228	-0.254738	-0.0331057	-0.0147845	-0.0226901	-0.0935583	-0.0586616	0.880916	0.215152	0.0253043	0.0214412	0.0474363	0.0579427	0.275695	-0.0282297	-0.053248	-0.0336437	-0.0270071	-0.0150175	-0.118891
LOC101928921	-0.0719102	0.0375434	0.00057928	-0.058468	-0.0285301	-0.183694	-0.15838	-0.0631373	-0.0747444	0.00490007	-0.0301806	-0.0807068	0.111875	0.111814	0.0344684	0.132586	0.10537	0.164013	0.31902	0.0301262	0.0738257	0.0464207	0.757392	0.0666672	0.0242389
ZNF641	-0.0823411	0.187527	0.118625	-0.00383934	0.0504646	-0.00252849	-0.57125	-0.00896074	0.000465703	-0.0490693	0.00139328	0.0366597	0.277304	0.220924	0.239748	0.365522	0.316875	0.428393	0.845094	0.10424	0.164852	0.184158	0.0416799	0.0759131	0.06551
C1orf110	-0.189554	-0.0897733	-0.0989673	0.671173	-0.0741442	-0.0147831	0.103283	0.17528	-0.105636	-0.142806	-0.071847	-0.104787	-0.109861	-0.0999972	-0.163249	-0.135433	-0.131684	-0.0975908	-0.181683	-0.100339	-0.0433009	0.280766	0.12746	-0.05661	0.153144
FGFR4	0.387588	0.0789493	0.0207298	-0.12016	-0.120094	-0.150352	-0.481157	-0.0758906	0.00170893	-0.00803071	-0.0610955	-0.0365134	0.194372	0.155087	0.145513	0.20386	0.183959	0.270438	0.626792	0.0493475	0.0682943	0.0530352	-0.0418344	0.0440105	-0.231644
FILIP1L	-0.00474979	0.0918935	0.0619947	-0.024994	-0.0183373	-0.0501404	-0.836937	-0.0331519	0.00657083	0.0724276	-0.00881863	0.0159202	0.24275	0.330935	0.192358	0.230632	0.213799	0.238927	0.910796	0.0617571	0.124494	0.0903042	0.0454055	0.0532228	-0.0588208
PDILT	-0.00777083	-0.0121873	-0.00624516	-0.0160956	0.0275681	-0.0147475	-0.4406	-0.0407877	-0.0272388	0.0934186	-0.0316349	-0.00831334	0.0773496	0.280438	0.073021	0.0670443	0.0557725	0.0749911	0.421389	0.0230865	0.00722175	-0.0214722	0.00657052	-0.000298874	-0.104492
ZBTB26	-0.288432	-0.0684655	0.301489	-0.0375828	-0.120424	-0.0913337	0.294677	0.363923	0.0609556	0.167939	0.071603	0.21107	-0.173914	-0.197372	0.167278	-0.0957325	-0.120748	-0.127657	-0.255261	-0.0947814	0.437962	-0.0439726	0.508787	-0.0390211	0.350972
ACY3	0.011579	0.0121441	-0.0536352	0.101758	-0.157643	-0.137743	0.154648	-0.119241	-0.0320991	-0.0808048	-0.0174587	-0.124802	-0.0790459	-0.0476211	0.397178	0.232989	-0.0484912	-0.03789	-0.116181	0.724411	-0.0638263	-0.0890485	-0.00802518	0.0325909	0.0140053
LINC00051	-0.00424562	0.0817177	0.0528087	-0.0194834	-0.0192916	-0.0287291	-0.902576	-0.0517146	-0.0089483	0.0413313	-0.0354124	0.000295952	0.231357	0.297029	0.180326	0.26265	0.201214	0.22565	0.946921	0.0539302	0.133882	0.0844015	0.0644642	0.0532809	-0.0693709
LKAAEAR1	-0.0402702	-0.0202817	-0.0496402	-0.0902308	-0.0734725	-0.0899627	-0.218541	-0.0693774	-0.0779311	-0.0459894	-0.0902149	-0.0812761	0.0880128	0.0923721	-0.0057952	0.234641	0.0166956	0.0166691	0.207906	-0.0427347	-0.0334265	0.0206436	-0.0491899	-0.0525449	-0.110998
ERICH1-AS1	-0.0139069	0.174765	0.0753507	-0.140459	-0.0275245	-0.173135	-0.727054	0.00892717	0.0588224	-0.0257357	-0.0175964	0.0153452	0.357351	0.293558	0.176508	0.361721	0.312287	0.382893	0.948495	0.141928	0.183114	0.206293	0.111373	0.134334	-0.0141364
EQTN	-0.0452795	0.0312043	0.0330125	-0.00480775	0.0587117	0.00851107	-0.736999	-0.0122864	0.026082	0.0462442	0.0113949	0.132241	0.130161	0.22695	0.0976576	0.0983678	0.128549	0.106457	0.744903	0.0206004	0.185414	0.0348636	0.0634345	0.0248929	-0.0093659
LINC00317	-0.0309188	0.0309566	0.019613	-0.0428345	0.0324133	-0.0355875	-0.663953	-0.0502069	-0.0209227	0.08441	-0.0423849	0.00473952	0.159222	0.205329	0.126525	0.153532	0.1326	0.170375	0.6839	0.042642	0.0737886	0.0363796	0.0228969	0.0346664	-0.0796034
HLA-DOB	-0.0571166	0.0443331	0.0144633	-0.0480458	-0.0810209	-0.054743	-0.368074	-0.0552296	-0.0707028	0.0558056	-0.0682687	-0.0339011	0.127446	0.0960422	0.0449227	0.14573	0.118939	0.149956	0.452973	0.901328	0.0793552	0.0831438	0.00296985	0.0705856	-0.0010171
SNX19	-0.0777188	0.0978124	0.0580805	-0.0373085	0.107569	0.0479928	-0.837925	-0.0392237	0.0464249	0.160508	-0.0634646	0.0150608	0.302249	0.283898	0.2447	0.241851	0.26344	0.368605	0.950376	0.0465212	0.13247	0.0904254	0.0127283	0.0795026	-0.0114966
GOLGA3	-0.267013	0.13916	0.10058	-0.0516986	-0.0415511	0.0334893	-0.268158	0.0856805	0.102454	0.344198	0.119997	0.0544209	0.19299	0.0513223	0.103017	0.759305	0.251719	0.283686	0.566094	0.0912834	0.164752	0.272265	0.109022	0.125411	0.311461
SLC9C2	-0.00535231	0.0914438	0.075204	-0.0245098	0.0010866	-0.0696409	-0.904429	-0.0385726	0.0142971	0.0792914	-0.0368015	0.0186418	0.245942	0.331277	0.195347	0.217033	0.209657	0.24771	0.963833	0.0833101	0.141135	0.0865566	0.0672653	0.076853	-0.0759049
AREL1	-0.0662122	0.0764564	0.0177767	0.114627	-0.00428247	-0.100051	-0.766303	-0.0231599	0.0487958	0.0451424	-0.0619762	-0.0021985	0.245311	0.324195	0.110591	0.237751	0.199653	0.256242	0.838049	0.0223332	0.119011	0.0458445	0.106366	0.0703507	-0.0382607
[truncated: 20,105 more rows]
