# Supplementary material for: Identification of the Potential Biomarkers in Barrett’S Esophagus Derived Esophageal Adenocarcinoma
Source: Research Square preprint supplement (doi:10.21203/rs.3.rs-1127858/v1), 2021-12-03
Supplement: Supplementary file 4 [file 760c56e97ee61a938e0241e5.xlsx]

## Sheet: Table S3
	GS.BE	GS.EAC
EFNA1	-0.903738	0.903738
RBM25	0.900276	-0.900276
PJA2	0.894395	-0.894395
WRAP73	-0.889516	0.889516
C7orf50	-0.878171	0.878171
C17orf62	-0.877011	0.877011
PRORSD1P	-0.876484	0.876484
SUCLG2	0.875097	-0.875097
TRMT6	-0.87408	0.87408
TTI1	-0.869355	0.869355
TMEM216	-0.867182	0.867182
DDX27	-0.864345	0.864345
ATP6V0D1	0.864015	-0.864015
MORC2	-0.863905	0.863905
AAR2	-0.859269	0.859269
CCDC86	-0.854515	0.854515
ZGPAT	-0.852766	0.852766
DNTTIP1	-0.848683	0.848683
LINC-PINT	-0.847716	0.847716
HMHA1	-0.847138	0.847138
DROSHA	-0.844687	0.844687
FAM50A	-0.843828	0.843828
VDAC1	0.84247	-0.84247
NFKBIE	-0.842261	0.842261
EIF4E	0.841656	-0.841656
NFE2L3	-0.841433	0.841433
RAB18	0.840638	-0.840638
POP7	-0.839758	0.839758
TMEM104	-0.839056	0.839056
ZHX1-C8orf76	-0.835874	0.835874
SCOC	0.8349	-0.8349
DDRGK1	-0.834712	0.834712
POLR2G	-0.833827	0.833827
HPGD	0.832436	-0.832436
TSEN34	-0.831248	0.831248
PHRF1	-0.831076	0.831076
COMMD7	-0.830192	0.830192
LOC284513	-0.829635	0.829635
PFDN2	-0.829464	0.829464
LAGE3	-0.827943	0.827943
NDRG3	-0.827309	0.827309
CEBPB	-0.826541	0.826541
METTL1	-0.82547	0.82547
E2F3	-0.825301	0.825301
RP11-196G18.24	-0.824693	0.824693
ADAM9	0.824243	-0.824243
LINC00623	-0.82231	0.82231
CDCA7L	-0.82204	0.82204
ADCY3	-0.821851	0.821851
ABLIM1	0.821703	-0.821703
EIF5B	-0.820767	0.820767
PAFAH1B1	0.820078	-0.820078
E2F6	-0.81835	0.81835
NOP2	-0.818169	0.818169
BRPF1	-0.817922	0.817922
DICER1	0.817586	-0.817586
SENP5	-0.816926	0.816926
PABPC1L	-0.816875	0.816875
MAN2B1	-0.816502	0.816502
E4F1	-0.81629	0.81629
ZNF239	-0.816099	0.816099
ALKBH6	-0.814484	0.814484
FBXL5	0.814055	-0.814055
TRAF2	-0.813336	0.813336
PHF8	-0.813219	0.813219
FANCE	-0.812775	0.812775
PPP1R35	-0.8119	0.8119
ADPRHL2	-0.811148	0.811148
EDC4	-0.811041	0.811041
IRF7	-0.809752	0.809752
MRPS26	-0.809684	0.809684
ALKBH5	0.809516	-0.809516
NOP58	-0.809406	0.809406
VPS16	-0.809116	0.809116
MYL12A	-0.809034	0.809034
PLEKHG4	-0.808934	0.808934
PLBD2	-0.807814	0.807814
SCYL1	-0.807041	0.807041
DCLRE1C	-0.806974	0.806974
BGN	-0.806433	0.806433
TLR2	-0.805732	0.805732
SLC12A9	-0.80561	0.80561
RP11-554J4.1	-0.804707	0.804707
TOR3A	-0.804156	0.804156
ADH1B	0.802941	-0.802941
DNAJB14	0.80282	-0.80282
COL16A1	-0.802699	0.802699
GDI2	0.802137	-0.802137
GLIS2	-0.801969	0.801969
RGS3	-0.801339	0.801339
C11orf83	-0.801	0.801
GLUD1	0.799518	-0.799518
DDX54	-0.799054	0.799054
PSMG3	-0.798978	0.798978
WHAMM	-0.798934	0.798934
YDJC	-0.798925	0.798925
TRIM11	-0.798832	0.798832
ZNF777	-0.798819	0.798819
ENTHD2	-0.798769	0.798769
AC091133.1	-0.798034	0.798034
SAC3D1	-0.797889	0.797889
JMJD4	-0.797653	0.797653
RBM10	-0.797605	0.797605
GHITM	0.796813	-0.796813
HMGCR	0.795531	-0.795531
MED26	-0.795267	0.795267
UQCRC2	0.794646	-0.794646
ZNF202	-0.794597	0.794597
SYPL1	0.794054	-0.794054
ANKRD22	0.793029	-0.793029
GMEB2	-0.792915	0.792915
PSD3	0.792347	-0.792347
SDR39U1	-0.79214	0.79214
CAPN9	0.791935	-0.791935
PGS1	-0.791853	0.791853
CAMK2D	0.791805	-0.791805
HSPBAP1	-0.790082	0.790082
MAML1	-0.789554	0.789554
LINC01138	-0.788852	0.788852
SSFA2	0.788172	-0.788172
YWHAH	0.787192	-0.787192
PPP2CA	0.786931	-0.786931
ALDH3A2	0.786814	-0.786814
ABHD5	0.786359	-0.786359
RNMT	-0.785438	0.785438
USP32	-0.784876	0.784876
C11orf96	-0.784866	0.784866
ZNF408	-0.784792	0.784792
SDHAF1	-0.784434	0.784434
PTRH2	-0.784071	0.784071
ATG2A	-0.783227	0.783227
AMIGO2	-0.782607	0.782607
LSM10	-0.782466	0.782466
ASH1L-AS1	-0.782114	0.782114
ACOT8	-0.781948	0.781948
PLEKHA8P1	-0.781874	0.781874
TTC37	0.781598	-0.781598
IL15RA	-0.781464	0.781464
PSMD4	-0.780701	0.780701
BZW1	0.780124	-0.780124
ORAOV1	-0.779799	0.779799
LYAR	-0.778141	0.778141
DPM3	-0.778078	0.778078
C1orf226	-0.777845	0.777845
AUNIP	-0.777572	0.777572
SCARNA15	-0.777467	0.777467
NXT1	-0.777463	0.777463
DNMT1	-0.777322	0.777322
ZMYND19	-0.776576	0.776576
C9orf114	-0.776226	0.776226
DUSP28	-0.775711	0.775711
CRTC2	-0.775607	0.775607
CTNNA1	0.775451	-0.775451
CYP2C18	0.775426	-0.775426
GPD1L	0.775384	-0.775384
PLA2G15	-0.775346	0.775346
SCP2	0.77477	-0.77477
RRP36	-0.774441	0.774441
ZNF696	-0.773484	0.773484
CLINT1	0.773406	-0.773406
LIPF	0.773169	-0.773169
LMAN1	0.772966	-0.772966
PUS1	-0.772691	0.772691
AP3S1	0.772526	-0.772526
SFXN3	-0.772384	0.772384
GOLPH3L	0.772327	-0.772327
SLC25A33	-0.772065	0.772065
RAE1	-0.772016	0.772016
PPOX	-0.77201	0.77201
TCOF1	-0.771504	0.771504
BMS1	-0.771416	0.771416
LOC100996740	-0.771238	0.771238
AGO1	-0.771137	0.771137
ZSCAN25	-0.770974	0.770974
HDGF	-0.770841	0.770841
SIGIRR	-0.770515	0.770515
CCM2	-0.769991	0.769991
C7orf26	-0.769504	0.769504
CSE1L	-0.769294	0.769294
ASB6	-0.768588	0.768588
ZNF628	-0.768577	0.768577
GALNT7	0.76789	-0.76789
FTSJ3	-0.767725	0.767725
MRPS17	-0.766996	0.766996
SHOC2	0.76689	-0.76689
ZNF281	-0.766771	0.766771
ARF6	0.766624	-0.766624
DNLZ	-0.766478	0.766478
YIPF5	0.766369	-0.766369
URB2	-0.766167	0.766167
BOD1	-0.766032	0.766032
PSPC1	-0.765973	0.765973
B3GALT6	-0.765822	0.765822
FAM58A	-0.765549	0.765549
IER5L	-0.765198	0.765198
LTBP2	-0.764946	0.764946
MYL6B	-0.764627	0.764627
MYBL2	-0.764377	0.764377
RAB27B	0.764187	-0.764187
POU2F1	-0.764005	0.764005
DAG1	-0.763568	0.763568
PTGR1	0.763477	-0.763477
ENPEP	-0.763294	0.763294
UBL5	-0.762204	0.762204
RP11-285F7.2	-0.762098	0.762098
ACYP1	-0.761735	0.761735
KAT2A	-0.761555	0.761555
TIMM8A	-0.761252	0.761252
EXOSC2	-0.760833	0.760833
ZNF668	-0.760739	0.760739
CSNK1G2	-0.76062	0.76062
ACTR5	-0.760407	0.760407
NUP43	-0.760191	0.760191
CBR1	0.760185	-0.760185
ABCC10	-0.760115	0.760115
STK38	0.759999	-0.759999
SMEK1	0.759121	-0.759121
CHTF18	-0.759113	0.759113
UBE2Q1	-0.758896	0.758896
LOC101928487	-0.758617	0.758617
HIBCH	0.758597	-0.758597
DEGS2	0.758283	-0.758283
CTD-2292M16.8	-0.757973	0.757973
LOC644656	-0.757873	0.757873
COX17	-0.756641	0.756641
SLC7A8	0.756598	-0.756598
GLA	-0.756467	0.756467
ADAR	-0.75627	0.75627
MRPS18A	-0.756172	0.756172
TESK1	-0.755946	0.755946
SUGP1	-0.755701	0.755701
SPSB2	-0.754678	0.754678
SAR1B	0.754445	-0.754445
LOC101929177	-0.753964	0.753964
SDHD	0.75353	-0.75353
CDS1	0.753216	-0.753216
ATP6V1E2	-0.752404	0.752404
GGA2	-0.752266	0.752266
ABI2	-0.752081	0.752081
C1orf35	-0.752045	0.752045
SMYD5	-0.752009	0.752009
PAFAH2	0.751506	-0.751506
PLOD3	-0.751174	0.751174
TRAF3	-0.750714	0.750714
NDE1	-0.750562	0.750562
LRRC47	-0.750475	0.750475
KIAA0907	-0.750458	0.750458
HSPE1	-0.750173	0.750173
CCDC12	-0.74988	0.74988
GRAMD3	0.749725	-0.749725
UBL3	0.74956	-0.74956
THY1	-0.749429	0.749429
ZNF8	-0.74937	0.74937
CYP27B1	-0.749276	0.749276
NMT1	-0.748752	0.748752
TP53I13	-0.74858	0.74858
UBE2C	-0.748519	0.748519
RAB29	-0.748226	0.748226
COA4	-0.747983	0.747983
TSSC4	-0.747804	0.747804
WBP4	-0.747716	0.747716
ENKD1	-0.747578	0.747578
NINJ2	-0.746971	0.746971
SLC7A6OS	-0.746711	0.746711
LEPREL4	-0.746559	0.746559
APOC1	-0.746314	0.746314
ZNF629	-0.746298	0.746298
LONP1	-0.745951	0.745951
AKAP8	-0.745936	0.745936
P4HB	0.745528	-0.745528
CHGA	0.745379	-0.745379
ZNF142	-0.745084	0.745084
GNL2	-0.744914	0.744914
CDK5RAP1	-0.744828	0.744828
C4orf33	0.744725	-0.744725
IGFLR1	-0.744389	0.744389
RBM4	-0.743662	0.743662
MRPL9	-0.743012	0.743012
PODXL	-0.743008	0.743008
RP11-53O19.3	-0.742609	0.742609
EIF2B4	-0.74249	0.74249
HECTD1	0.741845	-0.741845
CWC22	-0.741812	0.741812
ASAH1	0.741678	-0.741678
CDIPT	-0.74167	0.74167
TNFRSF12A	-0.741352	0.741352
ZNF473	-0.741164	0.741164
LEPRE1	-0.740858	0.740858
NAA10	-0.740698	0.740698
DENND4B	-0.740689	0.740689
CMSS1	-0.740215	0.740215
DUSP2	-0.739897	0.739897
PLAGL2	-0.739808	0.739808
DHX16	-0.739726	0.739726
NDFIP1	0.739606	-0.739606
COL9A3	-0.739363	0.739363
TBL1XR1	0.73908	-0.73908
C2orf69	-0.739027	0.739027
HGH1	-0.73899	0.73899
WSB2	0.738779	-0.738779
UBL4A	-0.738575	0.738575
SUSD1	-0.738522	0.738522
GALNS	-0.738501	0.738501
SLC12A7	-0.738408	0.738408
TGIF2	-0.738337	0.738337
TMEM44-AS1	-0.738097	0.738097
HDGFRP2	-0.738073	0.738073
RP11-199F11.2	-0.737935	0.737935
OXLD1	-0.737766	0.737766
AMPD2	-0.737598	0.737598
MAL	0.737427	-0.737427
LAMA5	-0.73708	0.73708
SELT	0.736879	-0.736879
RAB1A	0.73681	-0.73681
MAF1	-0.736743	0.736743
RP5-1136G13.2	-0.736712	0.736712
SAP130	-0.736642	0.736642
POC5	-0.736582	0.736582
MUC6	0.736484	-0.736484
MTX1	-0.736456	0.736456
STIL	-0.736089	0.736089
CFLAR	0.735898	-0.735898
ACO2	0.735538	-0.735538
TYK2	-0.735393	0.735393
RHBDF2	-0.735359	0.735359
MPC1	0.735343	-0.735343
C1orf213	-0.734931	0.734931
SCARB2	0.734893	-0.734893
BANP	-0.734729	0.734729
RP11-363E7.4	0.734493	-0.734493
GLTSCR1	-0.734133	0.734133
UCKL1	-0.734065	0.734065
RIOK3	0.733933	-0.733933
CTB-31O20.2	-0.73362	0.73362
RAI14	-0.733598	0.733598
SIGMAR1	-0.733462	0.733462
C12orf65	-0.733418	0.733418
MEGF9	0.733383	-0.733383
HPDL	-0.733104	0.733104
LOC100630918	-0.732257	0.732257
EIF3B	-0.732022	0.732022
ZC3H10	-0.73114	0.73114
UIMC1	-0.731104	0.731104
PPP1R3C	0.730721	-0.730721
UROD	-0.730545	0.730545
PSMA7	-0.73039	0.73039
KRTCAP2	-0.730165	0.730165
ZSWIM6	0.729844	-0.729844
ZBTB24	-0.729785	0.729785
MTCH1	-0.72923	0.72923
ZPR1	-0.729081	0.729081
GNAQ	0.72893	-0.72893
LMBRD1	0.728448	-0.728448
RBMX2	-0.728429	0.728429
RP5-1074L1.4	-0.728157	0.728157
DTYMK	-0.728128	0.728128
SRP72	-0.728042	0.728042
TBC1D16	-0.726136	0.726136
POTEKP	0.726119	-0.726119
LTBP3	-0.725897	0.725897
PHKB	0.725856	-0.725856
SLC25A46	0.725705	-0.725705
AGAP3	-0.725052	0.725052
PAF1	-0.724925	0.724925
GALK2	0.724834	-0.724834
BLACAT1	-0.72446	0.72446
MUTYH	-0.724217	0.724217
MALSU1	-0.723466	0.723466
DUSP12	-0.722953	0.722953
GTSE1	-0.722722	0.722722
ZMYM3	-0.722469	0.722469
LOC153682	-0.722416	0.722416
HINFP	-0.722343	0.722343
AURKA	-0.722327	0.722327
SMEK2	-0.722259	0.722259
RAB14	0.72225	-0.72225
PIGW	-0.721834	0.721834
MAFG	-0.721708	0.721708
LUC7L2	-0.721618	0.721618
RAB10	0.721471	-0.721471
GDPD3	0.721464	-0.721464
SNRNP35	-0.721431	0.721431
MRPS6	-0.721185	0.721185
ORC6	-0.721076	0.721076
NUP62	-0.720898	0.720898
TSC22D2	0.720843	-0.720843
CTCF	-0.720445	0.720445
LRFN4	-0.719605	0.719605
FLJ37453	-0.719585	0.719585
MSTO1	-0.719533	0.719533
KLHL21	-0.719532	0.719532
LMAN2L	-0.719399	0.719399
IL13RA1	-0.719199	0.719199
COX16	0.718458	-0.718458
C10orf2	-0.718419	0.718419
MRGBP	-0.718251	0.718251
ZNF133	-0.717936	0.717936
MAPKAPK2	-0.717268	0.717268
AHCYL1	0.717266	-0.717266
LAPTM4A	0.717184	-0.717184
ETFDH	0.717012	-0.717012
DOPEY2	0.716623	-0.716623
PPRC1	-0.716298	0.716298
NSFL1C	-0.716202	0.716202
SLC25A32	-0.716053	0.716053
LOC100507459	-0.716044	0.716044
MPHOSPH10	-0.716032	0.716032
UPF3B	-0.715472	0.715472
KIF22	-0.715444	0.715444
TIGD1	-0.715441	0.715441
BYSL	-0.715096	0.715096
FBXO7	0.714891	-0.714891
AEBP1	-0.714648	0.714648
LINC00261	0.714643	-0.714643
CD97	-0.714621	0.714621
PLEKHA8	-0.714596	0.714596
CUTA	-0.714224	0.714224
RRP1	-0.714126	0.714126
NUP160	-0.714042	0.714042
TMEM30B	0.714035	-0.714035
SMIM15	0.713743	-0.713743
BRIX1	-0.713631	0.713631
CD248	-0.71319	0.71319
LRRC14	-0.713045	0.713045
RGS19	-0.71295	0.71295
FUT8	0.712873	-0.712873
DSG2	0.712532	-0.712532
C6orf47	-0.712282	0.712282
GTF3C2	-0.712073	0.712073
FBRSL1	-0.711696	0.711696
UBAP2L	-0.71154	0.71154
SNHG17	-0.711187	0.711187
RFNG	-0.710902	0.710902
UQCR10	0.710741	-0.710741
DYNC1LI2	0.710728	-0.710728
SLC44A4	0.71059	-0.71059
LIAS	0.710429	-0.710429
C8orf82	-0.710399	0.710399
MICB	-0.70984	0.70984
MRPL35	0.709458	-0.709458
NUP214	-0.709413	0.709413
LSM5	-0.709329	0.709329
PLAU	-0.709145	0.709145
MYO1A	0.708908	-0.708908
RNF44	-0.708784	0.708784
HIGD1A	0.708644	-0.708644
UBALD2	-0.70837	0.70837
AP1AR	0.708256	-0.708256
FJX1	-0.708035	0.708035
NAT10	-0.708021	0.708021
LYSMD2	-0.707683	0.707683
S100PBP	-0.707628	0.707628
FBXO9	0.707541	-0.707541
DNAJB9	0.707419	-0.707419
STX19	0.707086	-0.707086
ZXDC	-0.706883	0.706883
PRKAR2B	0.706765	-0.706765
FAM114A2	0.706561	-0.706561
RAMP1	-0.706518	0.706518
GPM6B	0.706414	-0.706414
PDRG1	-0.706358	0.706358
ATP5C1	0.706291	-0.706291
EMD	-0.706189	0.706189
VPS11	-0.706177	0.706177
TAB2	0.706158	-0.706158
ATP6V1B2	0.706157	-0.706157
FAM131A	-0.706141	0.706141
SETD2	-0.706104	0.706104
CCDC137	-0.705978	0.705978
B3GNT2	0.705701	-0.705701
MTERF3	-0.705633	0.705633
TMEM100	0.705337	-0.705337
RPP25L	-0.70533	0.70533
GMPPA	-0.705323	0.705323
SHARPIN	-0.704865	0.704865
MTR	-0.704828	0.704828
GALNT1	0.704412	-0.704412
LNX1	0.703754	-0.703754
PSMB2	-0.703666	0.703666
FAM214A	0.703583	-0.703583
PDIA3	0.703269	-0.703269
COL18A1	-0.703005	0.703005
MED22	-0.7029	0.7029
FLAD1	-0.702876	0.702876
SLC26A11	-0.702811	0.702811
PCNP	0.702572	-0.702572
RSL24D1	0.702446	-0.702446
TOE1	-0.70236	0.70236
XRCC1	-0.702332	0.702332
CEP72	-0.702327	0.702327
AIMP2	-0.702008	0.702008
RAD23B	0.701626	-0.701626
ACAD8	0.701585	-0.701585
RP11-480A16.1	-0.701263	0.701263
LIG4	0.701016	-0.701016
PSMD11	-0.70091	0.70091
STT3A	0.700683	-0.700683
WDR54	-0.700621	0.700621
PTDSS2	-0.700598	0.700598
FOXC1	-0.700418	0.700418
IMP4	-0.700315	0.700315
TEX30	-0.700275	0.700275
TRADD	-0.700209	0.700209
EPHB3	0.70016	-0.70016
C19orf60	-0.700053	0.700053
HYAL1	0.699744	-0.699744
NCOR2	-0.699679	0.699679
HTT	-0.699661	0.699661
TGM2	-0.699592	0.699592
VSIG1	0.699256	-0.699256
PAXIP1-AS1	-0.699204	0.699204
TSEN54	-0.699088	0.699088
TPD52	0.698874	-0.698874
C19orf24	-0.698691	0.698691
TRAPPC8	0.698602	-0.698602
SF3B4	-0.698515	0.698515
CLK2	-0.698486	0.698486
PRR24	-0.698447	0.698447
TUFT1	-0.698435	0.698435
ZNF101	-0.698345	0.698345
PDE8A	0.698265	-0.698265
NCBP2-AS2	-0.698136	0.698136
MAMDC2	0.698093	-0.698093
CHST14	-0.697619	0.697619
RGS1	-0.69746	0.69746
RNASE4	0.69729	-0.69729
ZNF766	-0.697254	0.697254
COPRS	-0.69724	0.69724
AKR1B10	0.697231	-0.697231
JTB	-0.697194	0.697194
ARF4	0.69714	-0.69714
STAG2	0.696961	-0.696961
BTBD6	-0.696596	0.696596
SEC24A	0.696338	-0.696338
GPATCH8	-0.695842	0.695842
IFITM1	-0.695626	0.695626
TUBGCP5	0.6956	-0.6956
DCUN1D2	-0.695413	0.695413
PDCD6IP	0.695268	-0.695268
APOLD1	-0.695208	0.695208
CIAO1	-0.695157	0.695157
PNKP	-0.695142	0.695142
C14orf80	-0.695112	0.695112
STK31	-0.695028	0.695028
ATP6V1A	0.694968	-0.694968
STX16	0.694961	-0.694961
ZMYM2	-0.694874	0.694874
CDCA5	-0.694731	0.694731
AP3B1	0.694555	-0.694555
ZNF584	-0.694198	0.694198
CKMT2-AS1	-0.69416	0.69416
RHOA	0.694021	-0.694021
SCAMP3	-0.694012	0.694012
CABLES2	-0.693891	0.693891
KNOP1	-0.693642	0.693642
KRT20	0.693629	-0.693629
MPZL2	0.693459	-0.693459
NBPF20	-0.693415	0.693415
LSS	0.693273	-0.693273
MCM6	-0.693194	0.693194
MB21D1	-0.693065	0.693065
NOLC1	-0.692797	0.692797
MED1	-0.692684	0.692684
SLC39A4	-0.692663	0.692663
FAR1	0.692591	-0.692591
MOCS2	0.692371	-0.692371
ZNF688	-0.692344	0.692344
CCNG1	0.692184	-0.692184
GEMIN4	-0.692103	0.692103
PROSER2	-0.692102	0.692102
PAPD7	-0.692065	0.692065
OSR2	-0.692026	0.692026
PRRC1	0.691909	-0.691909
NINJ1	-0.6919	0.6919
ZNF266	-0.691398	0.691398
KHDRBS1	-0.691392	0.691392
CBFB	-0.691246	0.691246
IDH1	0.691159	-0.691159
DPP7	-0.691095	0.691095
RPIA	-0.69107	0.69107
ANP32E	-0.690936	0.690936
SIAH2	0.690842	-0.690842
COPB2	0.690826	-0.690826
PUS7	-0.690758	0.690758
PIN4	-0.690392	0.690392
KIAA1033	0.690327	-0.690327
POLD1	-0.690265	0.690265
BATF	-0.690056	0.690056
ZFP41	-0.690031	0.690031
NUDC	-0.689112	0.689112
SLC35A3	0.689011	-0.689011
SMYD3	-0.688961	0.688961
ACKR4	0.688854	-0.688854
FZD2	-0.688697	0.688697
ESCO1	-0.68869	0.68869
SSSCA1	-0.688577	0.688577
IER3	-0.688544	0.688544
DDX51	-0.688515	0.688515
TIMP1	-0.688416	0.688416
POLRMT	-0.688403	0.688403
SULT1B1	0.688338	-0.688338
RP11-589P10.5	-0.688284	0.688284
TTC4	-0.68816	0.68816
FOXO1	-0.68805	0.68805
EDF1	-0.687837	0.687837
ALDH18A1	0.687457	-0.687457
PTPRA	-0.687311	0.687311
C3	-0.687295	0.687295
CCDC84	-0.687096	0.687096
SLC33A1	0.687088	-0.687088
CCNI	0.687068	-0.687068
WDR5	-0.68705	0.68705
PAFAH1B3	-0.686933	0.686933
TXNL1	0.686688	-0.686688
DHCR24	0.686401	-0.686401
CA2	0.686388	-0.686388
MED8	0.686324	-0.686324
ZNF267	-0.686309	0.686309
MNT	-0.68616	0.68616
ARFIP1	0.686137	-0.686137
ZNF574	-0.68599	0.68599
TRIM37	-0.68589	0.68589
EHF	0.6855	-0.6855
RECQL4	-0.685399	0.685399
TMEM150A	-0.685254	0.685254
TBCE	-0.684739	0.684739
GALT	-0.684619	0.684619
HMGXB4	-0.684131	0.684131
ACD	-0.684072	0.684072
ARFGAP1	-0.684048	0.684048
CYB5R4	0.683989	-0.683989
GNA12	-0.683856	0.683856
TMED2	0.68379	-0.68379
RNF146	0.683645	-0.683645
STAT6	-0.683577	0.683577
TRAPPC3	0.683538	-0.683538
GSDMD	-0.683316	0.683316
ERMP1	0.683306	-0.683306
LAMB2	-0.683202	0.683202
ZNF143	-0.683158	0.683158
AEN	-0.682964	0.682964
XPO4	-0.682951	0.682951
IMMP1L	-0.682944	0.682944
GPR4	-0.682719	0.682719
NDC80	-0.682649	0.682649
MIRLET7D	-0.682422	0.682422
FCGBP	0.68195	-0.68195
MED29	-0.681885	0.681885
TEX10	0.681413	-0.681413
F2RL1	0.681164	-0.681164
SLC30A5	0.68112	-0.68112
SULT1C2	0.681042	-0.681042
RNASEH1	-0.680945	0.680945
UTP6	-0.680896	0.680896
DDOST	-0.680772	0.680772
PMEPA1	-0.680554	0.680554
KB-431C1.4	-0.680505	0.680505
ARRDC2	-0.680491	0.680491
SLC4A1AP	-0.680392	0.680392
GDAP2	0.680134	-0.680134
LRRC57	-0.68007	0.68007
RIOK1	-0.680033	0.680033
TMEM51	-0.679998	0.679998
MCM2	-0.679807	0.679807
PAN3	-0.679785	0.679785
DEDD2	-0.679434	0.679434
FAM64A	-0.679334	0.679334
UBOX5	-0.679265	0.679265
AXDND1	0.67926	-0.67926
RNF207	-0.679226	0.679226
YARS	-0.678921	0.678921
TULP3	-0.67891	0.67891
SYNPO2	0.678757	-0.678757
DNAJC1	-0.678667	0.678667
RBM3	0.678308	-0.678308
PAQR7	-0.678158	0.678158
MAD1L1	-0.677925	0.677925
GRK6	-0.67788	0.67788
UBXN1	-0.677849	0.677849
ACTR2	0.677745	-0.677745
RNASEH1-AS1	-0.677666	0.677666
PIGR	0.677545	-0.677545
SERPINB1	0.677109	-0.677109
CSGALNACT2	-0.677026	0.677026
LOC439911	-0.676979	0.676979
ACTG2	0.67684	-0.67684
CCHCR1	-0.676793	0.676793
ZKSCAN5	-0.6767	0.6767
COBLL1	0.676562	-0.676562
IRF3	-0.676507	0.676507
ADSL	-0.676499	0.676499
PIK3C2G	0.676383	-0.676383
CENPBD1P1	-0.676319	0.676319
FANCG	-0.676162	0.676162
RASSF7	-0.676036	0.676036
SNRPA	-0.675985	0.675985
SCRIB	-0.675962	0.675962
PROCR	-0.675889	0.675889
COL4A2	-0.675122	0.675122
ADAP2	-0.675094	0.675094
ANKZF1	-0.674886	0.674886
LOC100129550	-0.674859	0.674859
FAM117B	-0.674854	0.674854
WDR81	-0.674759	0.674759
ACBD6	-0.674678	0.674678
IL1RN	0.674597	-0.674597
C15orf39	-0.674562	0.674562
BMS1P6	0.674545	-0.674545
PMS2P5	-0.674436	0.674436
RFC3	-0.674418	0.674418
ZCCHC17	-0.674265	0.674265
LOC338620	-0.674254	0.674254
PTER	0.674171	-0.674171
CRCP	-0.67365	0.67365
LINC00115	-0.673613	0.673613
RP11-50B3.4	0.673511	-0.673511
DLGAP1-AS1	-0.673227	0.673227
LINC01000	-0.673125	0.673125
LAMP3	-0.672977	0.672977
SNX2	0.672876	-0.672876
CXorf38	-0.672663	0.672663
TAX1BP1	-0.672595	0.672595
PTBP1	-0.672519	0.672519
COX8A	0.67239	-0.67239
PSRC1	-0.672199	0.672199
SLC16A1	0.671976	-0.671976
FKBP9	-0.671864	0.671864
ALMS1	-0.67178	0.67178
XPO6	-0.671759	0.671759
ATAD3B	-0.671759	0.671759
LEMD2	-0.671367	0.671367
CDAN1	-0.671283	0.671283
FEN1	-0.671121	0.671121
IFT52	-0.670709	0.670709
NDRG2	0.670486	-0.670486
PROC	-0.670394	0.670394
PCNX	-0.670238	0.670238
SLC44A2	0.670145	-0.670145
KIAA1468	0.669747	-0.669747
ZNF587B	-0.669681	0.669681
AHNAK	0.669562	-0.669562
PDLIM5	0.669229	-0.669229
PDE6D	-0.669171	0.669171
LINC01004	-0.669091	0.669091
OCIAD1	0.669057	-0.669057
SCAMP1	0.668561	-0.668561
NOC4L	-0.668476	0.668476
TRAPPC10	0.668412	-0.668412
LINC00094	-0.668345	0.668345
FGFBP1	0.668207	-0.668207
GRWD1	-0.668184	0.668184
PLOD1	-0.66814	0.66814
RBM42	-0.668032	0.668032
UGT2B15	0.667998	-0.667998
ARHGEF18	-0.667967	0.667967
GOLGA5	0.667929	-0.667929
CPNE1	-0.66788	0.66788
TSPAN1	0.667844	-0.667844
AADAC	0.667332	-0.667332
PTS	0.66716	-0.66716
TMEM59	0.667039	-0.667039
EHMT2	-0.666712	0.666712
KIF2C	-0.665888	0.665888
C12orf10	-0.665753	0.665753
IL1R2	0.665493	-0.665493
METTL22	-0.665465	0.665465
BTN2A1	-0.665441	0.665441
LOC284889	-0.665336	0.665336
NMD3	0.665237	-0.665237
ZNF16	-0.665216	0.665216
IRS1	-0.665145	0.665145
RRS1	-0.664618	0.664618
ASXL1	-0.664601	0.664601
PSMD2	-0.664555	0.664555
KRBOX4	-0.664541	0.664541
TNPO3	-0.664508	0.664508
C19orf54	-0.664387	0.664387
HAUS7	-0.664319	0.664319
SERP1	0.664251	-0.664251
RRM1	0.664228	-0.664228
DDIAS	-0.663858	0.663858
KCTD9	0.663834	-0.663834
GOLGA4	0.663548	-0.663548
C1orf210	0.663539	-0.663539
MRPL47	-0.663333	0.663333
HSPH1	-0.663109	0.663109
SPC25	-0.662798	0.662798
SMARCA2	0.662726	-0.662726
USO1	0.662693	-0.662693
COMMD5	-0.662658	0.662658
ARMCX6	-0.662606	0.662606
SUV39H1	-0.662516	0.662516
LZTS3	-0.66237	0.66237
ZNHIT2	-0.662275	0.662275
ODF2	-0.662152	0.662152
ELK1	-0.662135	0.662135
TIMM44	-0.662046	0.662046
KCTD3	0.662036	-0.662036
SLC35A4	0.662021	-0.662021
SDHC	0.661773	-0.661773
NR2C2AP	-0.661302	0.661302
RPS10	-0.66125	0.66125
CDC42SE2	0.6611	-0.6611
SASS6	-0.661065	0.661065
CPSF6	-0.660853	0.660853
BICD1	-0.660817	0.660817
C2orf68	-0.660817	0.660817
LOC100131262	-0.660784	0.660784
MCM8	-0.660767	0.660767
ZNF827	-0.660765	0.660765
PFDN1	-0.660418	0.660418
ANKRD52	-0.660063	0.660063
ZNF593	-0.66006	0.66006
DHRS7	0.659804	-0.659804
MAPK3	0.659787	-0.659787
PHF13	-0.659661	0.659661
UNC119	-0.659387	0.659387
SLC16A9	0.659122	-0.659122
CHST12	-0.658756	0.658756
CD83	-0.658536	0.658536
PRPF39	0.658525	-0.658525
VPS72	-0.658377	0.658377
CDC37L1	0.658258	-0.658258
GZF1	-0.658231	0.658231
SCYL3	-0.658216	0.658216
DYRK2	-0.65817	0.65817
RNF14	0.658092	-0.658092
DNAJB2	-0.658051	0.658051
RRP9	-0.658042	0.658042
ZNF587	-0.657806	0.657806
COX2	0.657706	-0.657706
CD2AP	0.657659	-0.657659
CLCN6	-0.657494	0.657494
C11orf95	-0.657335	0.657335
NFKBIZ	0.657239	-0.657239
TMED10	0.657198	-0.657198
YWHAB	-0.657142	0.657142
NCKAP5	0.65703	-0.65703
PRPF19	-0.656716	0.656716
ETV7	-0.656655	0.656655
ARID4A	0.656561	-0.656561
MCF2L-AS1	-0.656538	0.656538
PIK3CD	-0.656521	0.656521
MEA1	-0.656367	0.656367
GNB1L	-0.656189	0.656189
TRIM23	0.655411	-0.655411
NOP14	-0.655127	0.655127
PLXDC1	-0.655107	0.655107
CDC34	-0.655104	0.655104
PDGFRB	-0.654956	0.654956
MSI2	-0.654951	0.654951
CCDC92	-0.65492	0.65492
RILPL2	-0.654909	0.654909
NCAPH	-0.654589	0.654589
SIX4	-0.654559	0.654559
ERH	0.654538	-0.654538
CSTF3	-0.654462	0.654462
C1orf122	-0.654398	0.654398
MRPS21	-0.654391	0.654391
MED30	-0.65439	0.65439
TAF3	-0.654231	0.654231
RAB27A	0.654146	-0.654146
HADH	0.654083	-0.654083
CBX1	-0.653912	0.653912
UGP2	0.653725	-0.653725
URM1	-0.653376	0.653376
CIRH1A	-0.653225	0.653225
COMMD10	0.653076	-0.653076
BOLA1	-0.652862	0.652862
OCLN	0.652545	-0.652545
NOSIP	-0.65252	0.65252
SNRPD1	-0.652499	0.652499
DLD	0.652436	-0.652436
MTUS1	0.652417	-0.652417
KLHL36	-0.652351	0.652351
CRBN	0.652342	-0.652342
ZSCAN16	-0.652189	0.652189
C1orf131	-0.652146	0.652146
TUG1	0.652141	-0.652141
XPO7	0.652141	-0.652141
PPIP5K2	0.652133	-0.652133
GJA4	-0.65186	0.65186
TAP1	-0.651732	0.651732
DSC2	0.651672	-0.651672
BDH2	0.651416	-0.651416
ZNF783	-0.651234	0.651234
CTHRC1	-0.651032	0.651032
PCED1A	-0.65093	0.65093
NUDT1	-0.650916	0.650916
EFEMP2	-0.650832	0.650832
RP11-382B18.4	0.650677	-0.650677
VAMP8	0.650665	-0.650665
RP11-258C19.7	-0.650654	0.650654
MAP3K9	0.650562	-0.650562
C1orf85	-0.650496	0.650496
RBM28	-0.650449	0.650449
FAM195B	-0.650443	0.650443
ZNF805	-0.649979	0.649979
NIPBL	0.649912	-0.649912
CTPS1	-0.649814	0.649814
MAK16	-0.649691	0.649691
CDH1	0.649611	-0.649611
THEM6	-0.649602	0.649602
KLHL42	-0.649453	0.649453
CEP164	-0.64941	0.64941
RPL32P3	-0.649383	0.649383
MARVELD1	-0.649364	0.649364
CPEB4	0.649057	-0.649057
CHPF2	-0.648937	0.648937
ALDH3A1	0.648933	-0.648933
PRIMA1	0.648843	-0.648843
NCAPD3	-0.648737	0.648737
TTF1	-0.648635	0.648635
YWHAG	-0.648523	0.648523
IWS1	-0.648469	0.648469
PPP1R14B	-0.64802	0.64802
COX7C	0.647931	-0.647931
PSMB8-AS1	-0.647925	0.647925
NEK6	-0.647864	0.647864
RBBP6	-0.647407	0.647407
HAPLN1	0.647294	-0.647294
TMC6	-0.647241	0.647241
RAD54L	-0.64711	0.64711
S100A14	0.647086	-0.647086
RRNAD1	-0.647014	0.647014
CSRNP2	-0.646995	0.646995
CDC5L	0.646949	-0.646949
MAP3K5	0.646863	-0.646863
KMT2B	-0.64671	0.64671
SPSB1	-0.646652	0.646652
RELB	-0.646631	0.646631
MAN1B1	-0.646551	0.646551
IKBKE	-0.646358	0.646358
TMUB2	-0.646194	0.646194
MRE11A	-0.646156	0.646156
RUNDC1	-0.646145	0.646145
AL590762.11	-0.646005	0.646005
ZNF26	-0.645986	0.645986
TOR1B	-0.645958	0.645958
ACTL6A	-0.64585	0.64585
CTA-29F11.1	-0.645369	0.645369
TNIK	0.645303	-0.645303
MTMR1	-0.645124	0.645124
LOC100132057	0.644966	-0.644966
NUP107	-0.644923	0.644923
BLM	-0.644836	0.644836
COPS8	-0.644701	0.644701
COPG1	0.644688	-0.644688
LCLAT1	-0.644637	0.644637
CCAR1	-0.644462	0.644462
HNRNPH1	0.644282	-0.644282
SGOL1	-0.644194	0.644194
BIN1	-0.64416	0.64416
B4GALT7	-0.644063	0.644063
SAE1	0.644014	-0.644014
FTO	-0.644003	0.644003
GSKIP	0.643951	-0.643951
CHD7	-0.643773	0.643773
CACYBP	-0.643714	0.643714
PYCARD	-0.643337	0.643337
ZNFX1	-0.64303	0.64303
PPP2R5D	-0.642966	0.642966
AP1M1	-0.64282	0.64282
DPCR1	0.642762	-0.642762
RHBDD1	-0.642734	0.642734
WDR74	-0.642718	0.642718
HOXA5	-0.642703	0.642703
MUC5AC	0.642497	-0.642497
TOPORS	0.642454	-0.642454
IDI1	0.642224	-0.642224
C17orf70	-0.641932	0.641932
GPR137B	-0.641889	0.641889
IRX3	0.641784	-0.641784
SELPLG	-0.641319	0.641319
TXLNGY	0.64124	-0.64124
CDHR2	0.640966	-0.640966
TIMM9	-0.640878	0.640878
KIF1C	0.640839	-0.640839
STK25	-0.640645	0.640645
NFIL3	-0.640621	0.640621
HTRA1	-0.640193	0.640193
DAB2IP	0.640052	-0.640052
ILKAP	-0.639975	0.639975
PRMT3	-0.639904	0.639904
RPL39L	-0.639811	0.639811
FANCL	-0.63981	0.63981
C5orf34	-0.63975	0.63975
KIAA1324	0.639735	-0.639735
CSTF1	-0.639585	0.639585
ICAM1	-0.639564	0.639564
KLF4	0.639548	-0.639548
CTB-12A17.3	0.639501	-0.639501
MFAP2	-0.639487	0.639487
MYZAP	0.639483	-0.639483
RPP14	0.63946	-0.63946
HEXDC	-0.639417	0.639417
IQGAP2	0.63939	-0.63939
FMNL2	-0.639315	0.639315
CCNE1	-0.639259	0.639259
MPLKIP	-0.639254	0.639254
DIEXF	-0.639254	0.639254
COX14	-0.638934	0.638934
STX4	-0.638647	0.638647
ABL1	-0.638534	0.638534
IRS2	-0.638392	0.638392
MRTO4	-0.638331	0.638331
ETFA	0.638083	-0.638083
PDDC1	-0.638026	0.638026
KIAA1147	0.637884	-0.637884
ATHL1	-0.63779	0.63779
LOC101929787	-0.637754	0.637754
SH2B3	-0.63739	0.63739
DDX39A	-0.637033	0.637033
CTC-338M12.4	-0.636948	0.636948
NR1D2	0.636642	-0.636642
ARFGEF1	0.636628	-0.636628
ZNF500	-0.636605	0.636605
RNF113A	-0.636578	0.636578
ATP1B1	0.636547	-0.636547
TOPBP1	-0.636368	0.636368
RANGRF	-0.636285	0.636285
ATP5B	0.636193	-0.636193
ATG4D	-0.635802	0.635802
CYSTM1	0.635801	-0.635801
CSNK2A2	-0.635691	0.635691
PSMD10	0.63569	-0.63569
CEP131	-0.635506	0.635506
LOC101927811	-0.635127	0.635127
RBM33	-0.634986	0.634986
NUDT15	-0.634901	0.634901
C3orf58	0.634886	-0.634886
CCDC125	0.634789	-0.634789
NASP	-0.634692	0.634692
DAP3	-0.634629	0.634629
EVA1C	-0.634572	0.634572
NPM3	-0.634554	0.634554
RNF24	-0.634442	0.634442
AHCTF1	-0.63439	0.63439
TOMM40	-0.63435	0.63435
ADH6	0.634334	-0.634334
SWI5	-0.634304	0.634304
USP8	0.634094	-0.634094
LOC101928545	-0.633924	0.633924
CD46	0.633722	-0.633722
IGJ	0.633315	-0.633315
FTSJ2	-0.633112	0.633112
KANSL2	-0.63303	0.63303
MRPL55	-0.633029	0.633029
FEM1C	0.632711	-0.632711
MMD	-0.632709	0.632709
C16orf80	-0.632562	0.632562
PRMT5	-0.632364	0.632364
HINT1	-0.632011	0.632011
SNAPC4	-0.631859	0.631859
SGK494	-0.631737	0.631737
MYO5C	0.63172	-0.63172
NUS1	0.631635	-0.631635
MMP9	-0.631527	0.631527
ATG4B	-0.631488	0.631488
TM9SF2	0.631386	-0.631386
DHX32	0.631346	-0.631346
ARNTL	-0.631137	0.631137
EDEM1	0.631073	-0.631073
POLR2D	-0.631022	0.631022
RNF13	0.630876	-0.630876
WRN	-0.630856	0.630856
PAOX	-0.630783	0.630783
PICALM	0.630774	-0.630774
ORAI3	-0.630756	0.630756
ARHGAP5	0.630435	-0.630435
CALM1	0.630382	-0.630382
ZC3H8	-0.630339	0.630339
MCU	0.630311	-0.630311
LIMA1	0.630243	-0.630243
SCAMP2	0.63006	-0.63006
TRIM56	-0.629736	0.629736
ZNF367	-0.629713	0.629713
CST4	-0.629401	0.629401
USP16	0.629122	-0.629122
ZNF32	-0.628965	0.628965
PLEKHB1	-0.628782	0.628782
GPANK1	-0.628752	0.628752
GSTZ1	0.628739	-0.628739
AGT	-0.628639	0.628639
HOMER2	0.628613	-0.628613
CAPRIN1	0.628512	-0.628512
ARPC3	0.628481	-0.628481
CERS6	0.628192	-0.628192
LBX2-AS1	-0.628185	0.628185
SCGN	0.628113	-0.628113
C9orf78	-0.628091	0.628091
USP4	-0.628082	0.628082
IL12RB1	-0.628004	0.628004
TSPAN33	-0.627994	0.627994
NUS1P3	0.627994	-0.627994
C11orf68	-0.627948	0.627948
ADH1C	0.627944	-0.627944
ARL2BP	0.627694	-0.627694
44260	0.627665	-0.627665
TMEM201	-0.627629	0.627629
SHFM1	-0.627563	0.627563
RBCK1	-0.627503	0.627503
C1orf52	-0.627463	0.627463
PSAP	0.627382	-0.627382
FBXO2	-0.62729	0.62729
MBOAT2	0.627262	-0.627262
ITGA8	0.627255	-0.627255
DDX56	-0.627119	0.627119
NSUN2	-0.627022	0.627022
DYNLL1	0.626945	-0.626945
TM2D1	-0.626865	0.626865
SLC25A37	0.626844	-0.626844
PATZ1	-0.626825	0.626825
UBE2G2	-0.626453	0.626453
TIMELESS	-0.626326	0.626326
SLC9A3R1	0.626303	-0.626303
NKRF	-0.626008	0.626008
GABARAP	0.625557	-0.625557
ZFYVE27	-0.625435	0.625435
UBE2D3	0.625399	-0.625399
RP11-644F5.11	-0.625394	0.625394
BCAP29	0.62516	-0.62516
PTGDR2	0.625055	-0.625055
TACC3	-0.625047	0.625047
PYCRL	-0.624914	0.624914
CHCHD7	-0.624836	0.624836
FDX1L	-0.624835	0.624835
ITCH	0.624761	-0.624761
LRRC45	-0.624679	0.624679
SLC3A2	-0.624562	0.624562
SULT1A1	0.62448	-0.62448
CD36	0.624309	-0.624309
HMBS	-0.624188	0.624188
OS9	0.624004	-0.624004
FAM168A	-0.623982	0.623982
SLC35D1	0.623982	-0.623982
SPATA32	0.623835	-0.623835
NOL6	-0.623666	0.623666
HIRIP3	-0.623386	0.623386
PELP1	-0.623328	0.623328
NEK8	-0.623201	0.623201
QSOX2	-0.623171	0.623171
LOC729680	-0.623106	0.623106
KCNAB2	-0.623077	0.623077
DPH2	-0.622919	0.622919
TMEM69	-0.622812	0.622812
RP5-1085F17.3	-0.622779	0.622779
DHX29	0.622661	-0.622661
MRPL14	-0.622587	0.622587
SHKBP1	-0.622318	0.622318
HADHA	0.6222	-0.6222
COL5A1	-0.622109	0.622109
BTNL8	0.622032	-0.622032
WDR90	-0.622027	0.622027
NPTN	0.622012	-0.622012
VEGFB	-0.621948	0.621948
DUS1L	-0.621947	0.621947
DNAJA2	0.621931	-0.621931
ADD1	-0.62177	0.62177
NUF2	-0.621724	0.621724
FAM219A	-0.621687	0.621687
VLDLR	0.621651	-0.621651
ZZZ3	-0.621609	0.621609
ZNF319	-0.621177	0.621177
CDKN2A	-0.621168	0.621168
SMARCD2	-0.62114	0.62114
GTF3A	-0.6211	0.6211
OTULIN	-0.620918	0.620918
EIF3G	-0.620914	0.620914
SLCO3A1	-0.620782	0.620782
GTPBP6	-0.620768	0.620768
BLOC1S6	0.620651	-0.620651
DCTPP1	-0.620637	0.620637
ANKS1A	-0.620382	0.620382
RHEBL1	-0.620332	0.620332
RCC2	-0.620308	0.620308
GLOD4	0.620308	-0.620308
ZNF251	-0.619897	0.619897
TMEM177	-0.61966	0.61966
BRD9	-0.619656	0.619656
PRDM15	-0.619623	0.619623
NOL7	-0.619569	0.619569
NAT14	-0.619476	0.619476
MRPL57	-0.619446	0.619446
RILPL1	-0.619412	0.619412
RAB8A	0.619332	-0.619332
CEP89	-0.619295	0.619295
PARS2	-0.619086	0.619086
VMA21	-0.619053	0.619053
ZNF320	-0.619036	0.619036
SECISBP2L	0.618867	-0.618867
DPT	0.618811	-0.618811
ZBTB48	-0.618609	0.618609
NDUFB5	0.61856	-0.61856
ZNF165	-0.618438	0.618438
RP11-226L15.5	-0.618369	0.618369
TMX1	0.618359	-0.618359
PLAC8	0.618327	-0.618327
ST20	-0.618316	0.618316
CPEB3	0.618306	-0.618306
EPHB4	-0.61819	0.61819
MAST2	-0.618133	0.618133
NEURL3	-0.617783	0.617783
P2RY14	0.617763	-0.617763
PTMA	0.617584	-0.617584
BID	-0.617577	0.617577
SLC5A6	-0.61755	0.61755
ARL6IP5	0.617465	-0.617465
RBM38	-0.617379	0.617379
ADIPOR1	0.61718	-0.61718
ENOX2	-0.616997	0.616997
ADH7	0.616969	-0.616969
SUV420H1	0.616854	-0.616854
PPIE	-0.616822	0.616822
IQGAP1	0.616793	-0.616793
PARD6A	-0.616755	0.616755
ADTRP	0.616374	-0.616374
IFITM2	-0.616223	0.616223
RP11-1094M14.11	-0.616168	0.616168
DDX19B	-0.616003	0.616003
YWHAZ	0.61599	-0.61599
DUS3L	-0.615824	0.615824
WFDC1	0.6158	-0.6158
DLAT	0.615758	-0.615758
PLP1	0.615752	-0.615752
JAK2	0.615737	-0.615737
REXO4	-0.615577	0.615577
PFN1	0.615469	-0.615469
NANP	-0.615398	0.615398
KIF18B	-0.615359	0.615359
FHL3	-0.615166	0.615166
C1orf198	-0.615163	0.615163
TMC8	-0.615033	0.615033
ZNF513	-0.61492	0.61492
SH3BGRL3	0.614866	-0.614866
FAM86A	-0.614731	0.614731
ME1	0.614719	-0.614719
ARL6IP4	-0.61468	0.61468
SPHK1	-0.614613	0.614613
FAM122B	-0.614513	0.614513
GRB10	-0.614474	0.614474
GNAI3	0.614315	-0.614315
PCYOX1	0.614251	-0.614251
EIF2S3	0.614232	-0.614232
SLC25A20	0.614091	-0.614091
TGS1	-0.613894	0.613894
LOC286437	-0.613798	0.613798
TNS3	-0.613745	0.613745
MYBBP1A	-0.613562	0.613562
AHCYL2	0.613522	-0.613522
RAPH1	0.613514	-0.613514
HIC2	-0.613464	0.613464
WSB1	0.61342	-0.61342
TMCO3	0.613402	-0.613402
PAWR	0.613315	-0.613315
FAM173A	-0.613177	0.613177
SP1	0.613172	-0.613172
PRPF4	-0.613169	0.613169
RNASEH2C	-0.613136	0.613136
ZNF526	-0.613122	0.613122
TC2N	0.613059	-0.613059
DHRS13	-0.613033	0.613033
SP110	-0.613017	0.613017
EIF6	-0.612943	0.612943
JAK1	0.612912	-0.612912
ERCC3	-0.612754	0.612754
SLCO2A1	0.612674	-0.612674
PUSL1	-0.612643	0.612643
CXCL8	-0.61262	0.61262
CHIC2	0.612614	-0.612614
ZNF764	-0.612569	0.612569
TMEM185B	-0.612539	0.612539
SCFD1	0.612513	-0.612513
ZNF579	-0.612416	0.612416
PANK3	0.61234	-0.61234
ZSCAN21	-0.612281	0.612281
ANGPT2	-0.612161	0.612161
PPIB	0.611904	-0.611904
PRRT3-AS1	-0.611876	0.611876
ZEB2	0.611848	-0.611848
TOMM34	-0.611791	0.611791
NCAPD2	-0.611644	0.611644
CPSF4	-0.611275	0.611275
TXN	0.611162	-0.611162
SRSF6	0.611147	-0.611147
ANXA10	0.610901	-0.610901
TMEM132A	-0.610887	0.610887
NAT9	-0.610771	0.610771
SFMBT1	-0.610697	0.610697
DIS3L2	-0.610674	0.610674
IRX5	0.610613	-0.610613
CCDC68	0.610603	-0.610603
RGL2	-0.610549	0.610549
SNX10	-0.610518	0.610518
TSPAN31	0.610436	-0.610436
KATNB1	-0.610328	0.610328
LOC100130987	-0.610225	0.610225
MRPS9	-0.610224	0.610224
ZNF384	-0.61019	0.61019
GEMIN6	-0.610186	0.610186
FANCF	-0.610101	0.610101
STK3	-0.609855	0.609855
NUP188	-0.60981	0.60981
GADD45B	-0.609605	0.609605
IQCB1	-0.609208	0.609208
GPX3	0.609134	-0.609134
ADO	-0.609122	0.609122
ZNF469	-0.609097	0.609097
ASB8	0.609046	-0.609046
SALL4	-0.609022	0.609022
LOC642236	0.608988	-0.608988
C14orf132	0.608705	-0.608705
SH3RF2	0.608668	-0.608668
PRKACB	0.608601	-0.608601
DDIT3	-0.608425	0.608425
ITM2A	0.6083	-0.6083
HRH1	-0.608253	0.608253
ZNF232	-0.608143	0.608143
ALDH2	0.608115	-0.608115
IFT57	-0.607974	0.607974
RASGEF1A	-0.607973	0.607973
KIAA1551	-0.607962	0.607962
HAUS5	-0.607715	0.607715
PGRMC2	0.607548	-0.607548
ATP5F1	0.607454	-0.607454
NTHL1	-0.607241	0.607241
TFCP2L1	0.606983	-0.606983
RP11-395B7.7	-0.606944	0.606944
LOC102723542	-0.606936	0.606936
INO80E	-0.606907	0.606907
CREBBP	-0.606612	0.606612
ZNF776	-0.606221	0.606221
FKBPL	-0.606124	0.606124
GFM2	0.606093	-0.606093
IL17RD	-0.606022	0.606022
ACTB	0.606018	-0.606018
CHSY1	-0.60586	0.60586
SPAG5	-0.60581	0.60581
ESYT1	-0.605716	0.605716
GINS1	-0.605636	0.605636
COQ10A	-0.605609	0.605609
LOC339988	-0.605342	0.605342
DNTTIP2	-0.605065	0.605065
KLK12	0.604923	-0.604923
SST	0.604901	-0.604901
RNA45S5	-0.604789	0.604789
TPST1	-0.604701	0.604701
DCTN4	0.604666	-0.604666
PTP4A1	0.604613	-0.604613
ST13	-0.604596	0.604596
SNX11	-0.60444	0.60444
METTL7A	0.604372	-0.604372
YTHDF1	-0.60436	0.60436
RHBDL2	0.604281	-0.604281
APPL2	0.604196	-0.604196
WDR46	-0.60411	0.60411
GET4	-0.60408	0.60408
MT1X	0.604069	-0.604069
LOC100289230	-0.603753	0.603753
EPB41L4B	0.603646	-0.603646
ATAD3A	-0.603574	0.603574
TCEAL8	0.603542	-0.603542
OPHN1	0.603465	-0.603465
INPPL1	-0.603368	0.603368
HSF1	-0.603327	0.603327
MESDC1	0.603261	-0.603261
ARMC1	0.603037	-0.603037
GAD1	-0.603002	0.603002
RFX5	-0.602997	0.602997
ING1	-0.602917	0.602917
PAICS	-0.602876	0.602876
ISG15	-0.60287	0.60287
RFX6	0.602522	-0.602522
SERINC1	0.602505	-0.602505
JARID2	-0.602458	0.602458
FOXO3	-0.602394	0.602394
WDR53	-0.602327	0.602327
CMC2	-0.602142	0.602142
ZNF121	-0.602051	0.602051
DIDO1	-0.601732	0.601732
CUEDC2	-0.601664	0.601664
ICE1	-0.60161	0.60161
LRP8	-0.601518	0.601518
FAM162A	0.601086	-0.601086
GPT	0.601016	-0.601016
WNT2	-0.60098	0.60098
TGOLN2	-0.600911	0.600911
PFAS	-0.600862	0.600862
NLRC5	-0.600715	0.600715
TNRC6B	0.600629	-0.600629
RP11-297L17.2	0.600583	-0.600583
LOC81691	-0.600545	0.600545
TIGD5	-0.600516	0.600516
SLC39A13	-0.60047	0.60047
BCORL1	-0.600297	0.600297
KDM2B	-0.600139	0.600139
DFFB	-0.600069	0.600069
TCF7L2	-0.600029	0.600029
LMOD1	0.599983	-0.599983
CAPZB	0.599797	-0.599797
COL4A1	-0.59973	0.59973
PPP1R15A	-0.599724	0.599724
TMEM167A	0.59961	-0.59961
TRA2A	0.599599	-0.599599
SART1	-0.599469	0.599469
UBE2D4	-0.599314	0.599314
CHN1	-0.59928	0.59928
PLAUR	-0.599173	0.599173
SLC25A19	-0.599033	0.599033
SLC35F2	-0.599	0.599
ADH1A	0.598966	-0.598966
BNIP2	-0.598928	0.598928
MAPRE2	0.598898	-0.598898
LOC101928963	-0.598772	0.598772
OGFOD2	-0.598586	0.598586
WDR4	-0.59832	0.59832
NCL	-0.598219	0.598219
ESRP1	0.59794	-0.59794
CD300A	-0.597894	0.597894
SUPT3H	-0.597788	0.597788
FBP2	0.597723	-0.597723
TMEM230	0.597502	-0.597502
TMEM39B	-0.597498	0.597498
YTHDF3	0.597491	-0.597491
RGL1	-0.597462	0.597462
NID2	-0.597346	0.597346
STMN2	0.597235	-0.597235
KCNE3	0.597212	-0.597212
ZNF124	0.597036	-0.597036
SLC10A3	-0.597005	0.597005
TPP1	-0.596879	0.596879
ZNF280C	-0.596744	0.596744
DDX49	-0.596657	0.596657
MANBAL	-0.596633	0.596633
UBR5	-0.596615	0.596615
RABGEF1	-0.596181	0.596181
FANCI	-0.596057	0.596057
GALNT12	0.595891	-0.595891
C1orf216	-0.59582	0.59582
MYLIP	-0.595796	0.595796
APH1A	0.595638	-0.595638
TBP	-0.595605	0.595605
TTYH2	-0.595605	0.595605
BRD8	-0.59544	0.59544
ZNF282	-0.595337	0.595337
ZDHHC9	-0.595313	0.595313
RP11-29H23.4	-0.59509	0.59509
LOC401068	-0.595011	0.595011
HNRNPUL1	-0.594839	0.594839
CEP120	0.594725	-0.594725
METTL23	-0.594686	0.594686
SLC7A6	-0.594638	0.594638
LCOR	0.594633	-0.594633
PLCG1	-0.594608	0.594608
SMYD4	-0.594502	0.594502
DIABLO	-0.594414	0.594414
SLC25A1	0.594215	-0.594215
PAPOLA	-0.594164	0.594164
SLC35B3	0.594135	-0.594135
PLIN2	-0.594135	0.594135
POR	-0.593818	0.593818
ERO1L	0.593753	-0.593753
ARL2	-0.593643	0.593643
FKBP11	-0.593597	0.593597
F8	-0.593531	0.593531
MIEN1	-0.593487	0.593487
PTPLB	0.593395	-0.593395
RP11-465B22.8	-0.593347	0.593347
NTMT1	-0.593307	0.593307
RP11-1275H24.2	-0.593288	0.593288
THAP3	-0.593237	0.593237
CALD1	-0.593226	0.593226
CLCN3	0.593124	-0.593124
MTFR2	-0.593101	0.593101
BCL2L12	-0.593084	0.593084
BTF3	0.593024	-0.593024
IPO4	-0.592973	0.592973
LOC100505915	0.592927	-0.592927
ECE1	-0.592838	0.592838
BLNK	0.592769	-0.592769
IL2RB	-0.592703	0.592703
XPO1	-0.592623	0.592623
ANKS3	-0.592524	0.592524
LSG1	-0.592373	0.592373
SEC61B	-0.592335	0.592335
SCARNA17	-0.59232	0.59232
NSUN5	-0.592269	0.592269
DOLK	-0.592075	0.592075
CLUH	-0.591966	0.591966
TMEM185A	-0.591964	0.591964
TNFAIP1	-0.591854	0.591854
B4GALT3	-0.591811	0.591811
44441	0.591618	-0.591618
ATP6V0C	0.591509	-0.591509
ZNF670	-0.591326	0.591326
C9orf72	-0.591293	0.591293
SEL1L	0.59128	-0.59128
SOSTDC1	0.591198	-0.591198
SETDB1	-0.59107	0.59107
TYW1	-0.591039	0.591039
NPEPL1	-0.590837	0.590837
USP21	-0.590773	0.590773
SEL1L3	0.590695	-0.590695
MYBL1	-0.590687	0.590687
TEAD4	-0.590398	0.590398
NDUFA4	0.59035	-0.59035
LOC101060264	-0.590266	0.590266
RNF11	0.590147	-0.590147
C15orf48	0.589917	-0.589917
COASY	-0.589636	0.589636
HOMER1	-0.589634	0.589634
UCK1	-0.589543	0.589543
IGFBP7	-0.589332	0.589332
SLC39A10	-0.589287	0.589287
MTURN	0.588941	-0.588941
COA5	-0.588827	0.588827
SLC9A2	0.588728	-0.588728
GOLPH3	0.588708	-0.588708
UTP23	-0.588707	0.588707
ZNF544	-0.588643	0.588643
PXDN	-0.588625	0.588625
B4GALT2	-0.588617	0.588617
SFR1	-0.588567	0.588567
RAB5A	0.588553	-0.588553
RP11-127B20.2	-0.588543	0.588543
OR7E37P	-0.588352	0.588352
GLTP	0.588272	-0.588272
C19orf12	-0.588189	0.588189
CFL1	0.588091	-0.588091
TSPYL2	-0.587845	0.587845
NCK2	-0.587826	0.587826
NDUFS6	-0.587821	0.587821
XDH	0.587777	-0.587777
HGS	-0.587719	0.587719
RP6-201G10.2	-0.587681	0.587681
SETD6	-0.587638	0.587638
THOC5	-0.587512	0.587512
ABCA11P	-0.587375	0.587375
DNAAF2	0.587307	-0.587307
STT3B	0.587217	-0.587217
RAB5B	0.587069	-0.587069
THUMPD2	-0.587062	0.587062
KDELR2	0.587036	-0.587036
MTAP	-0.586966	0.586966
TNFSF11	-0.58683	0.58683
AURKB	-0.586743	0.586743
CCDC113	-0.586656	0.586656
SYNE4	-0.586565	0.586565
GPKOW	-0.586528	0.586528
RTEL1	-0.586416	0.586416
RAB13	-0.586405	0.586405
RCAN1	0.586352	-0.586352
SCAMP5	-0.586297	0.586297
PCED1B	-0.586104	0.586104
SP100	-0.586095	0.586095
FAM83G	-0.585988	0.585988
F13A1	0.585979	-0.585979
TTC27	-0.585975	0.585975
PJA1	-0.58587	0.58587
RCN1	-0.585213	0.585213
SLC15A3	-0.58518	0.58518
FAM114A1	0.585126	-0.585126
CXCL1	-0.585031	0.585031
GDE1	0.584909	-0.584909
PCOLCE	-0.584888	0.584888
VSIG2	0.584861	-0.584861
PPP1R7	-0.584754	0.584754
ZBTB45	-0.584721	0.584721
ZNF137P	-0.584588	0.584588
RRP7A	-0.584573	0.584573
RALGPS2	0.584564	-0.584564
CPNE3	0.584539	-0.584539
LOC148413	-0.5845	0.5845
GRAMD1A	-0.584389	0.584389
ZNF432	-0.584257	0.584257
MEST	-0.58423	0.58423
C14orf28	0.584011	-0.584011
RP4-635E18.8	-0.584005	0.584005
RP11-348P10.2	-0.583945	0.583945
NKAP	-0.583807	0.583807
IFITM3	-0.583698	0.583698
SCARB1	-0.583662	0.583662
SEMA4D	-0.583604	0.583604
RAB15	-0.583574	0.583574
RP11-135A1.2	-0.583346	0.583346
TICRR	-0.583304	0.583304
KLK11	0.583304	-0.583304
C5orf24	0.583213	-0.583213
TM9SF1	-0.583127	0.583127
GGPS1	-0.582966	0.582966
CXorf56	-0.582906	0.582906
SREK1IP1	-0.582786	0.582786
HJURP	-0.582729	0.582729
B3GNTL1	-0.582305	0.582305
MCM7	-0.58224	0.58224
MORC4	-0.582216	0.582216
OSTC	0.582111	-0.582111
ZNF48	-0.581558	0.581558
PVRL2	-0.581495	0.581495
TSSC1	-0.58136	0.58136
CYB5R3	0.581283	-0.581283
GUSB	-0.581265	0.581265
MRPS5	-0.581057	0.581057
CCDC51	-0.580852	0.580852
CWH43	0.580827	-0.580827
IL17RB	-0.580805	0.580805
CCDC130	-0.580797	0.580797
C2orf42	-0.58073	0.58073
ZFAND2B	-0.580651	0.580651
BIRC6	0.580646	-0.580646
RTKN	-0.580617	0.580617
MIF4GD	-0.580614	0.580614
DHX8	-0.580581	0.580581
RPL22	-0.580568	0.580568
BC047484	-0.58043	0.58043
PHYKPL	0.580317	-0.580317
HSD3B7	-0.580251	0.580251
COMTD1	-0.580193	0.580193
ETV3	0.580126	-0.580126
SH3BP4	-0.580058	0.580058
FAM188A	0.580038	-0.580038
FOXK2	-0.58002	0.58002
MZT2B	-0.580012	0.580012
TFCP2	0.579975	-0.579975
TXNL4B	-0.579946	0.579946
GNPDA1	-0.579841	0.579841
YTHDC2	0.579577	-0.579577
SMG5	-0.579477	0.579477
ELOVL7	-0.579431	0.579431
C12orf66	-0.579426	0.579426
USP11	-0.579385	0.579385
CTSH	-0.579334	0.579334
ZKSCAN1	0.57933	-0.57933
NUBP2	-0.579213	0.579213
HMGB3	-0.578879	0.578879
ZNF37BP	-0.578871	0.578871
CITED2	0.578855	-0.578855
SLC25A3	0.578841	-0.578841
SLC39A6	0.578807	-0.578807
ANP32B	-0.578615	0.578615
RNF169	-0.578525	0.578525
EIF4B	0.578501	-0.578501
NUPL2	-0.57829	0.57829
LAS1L	-0.578288	0.578288
NIPSNAP1	0.578274	-0.578274
EGR2	-0.578188	0.578188
TFF1	0.57791	-0.57791
THEMIS2	-0.577783	0.577783
ARL15	0.57768	-0.57768
UBE2F	-0.577663	0.577663
ECI2	0.577606	-0.577606
PDHA1	-0.577575	0.577575
GLUL	0.577564	-0.577564
JADE1	-0.577562	0.577562
POLR2I	-0.577546	0.577546
ARPC1A	0.577516	-0.577516
KCP	-0.577493	0.577493
LAMC1	-0.577431	0.577431
NDUFA1	0.577249	-0.577249
DNAJC30	-0.577237	0.577237
CEP76	-0.577169	0.577169
ARAP3	-0.576825	0.576825
PLA2G7	-0.576728	0.576728
DMAP1	-0.576673	0.576673
LOC101927166	-0.57656	0.57656
COPS3	0.576537	-0.576537
PON3	-0.576507	0.576507
RP11-112J3.16	-0.576489	0.576489
C8orf76	-0.576299	0.576299
IL6ST	0.576297	-0.576297
CDC20	-0.57624	0.57624
LYPLA1	0.57617	-0.57617
NELFB	-0.576108	0.576108
HELQ	0.576069	-0.576069
SF3A2	-0.575999	0.575999
COG4	-0.57599	0.57599
PBRM1	0.57597	-0.57597
LOC100506302	-0.575794	0.575794
RP11-196G18.23	-0.575732	0.575732
TMEM203	-0.575701	0.575701
MED4	-0.575693	0.575693
STX6	-0.575477	0.575477
STAT1	-0.575342	0.575342
HHLA2	0.575316	-0.575316
GLB1L	-0.575251	0.575251
RBX1	0.575236	-0.575236
RASEF	-0.57519	0.57519
TMBIM6	0.574966	-0.574966
CKAP2L	-0.57495	0.57495
CDKN2AIP	0.574922	-0.574922
CSNK1G3	0.574846	-0.574846
LOC102724967	-0.574844	0.574844
MLH3	-0.574773	0.574773
BRAT1	-0.574736	0.574736
NUFIP1	-0.574667	0.574667
VPS54	-0.574643	0.574643
PRKCDBP	-0.574421	0.574421
SNX21	-0.574367	0.574367
MAT2B	0.574348	-0.574348
LRRFIP1	-0.574198	0.574198
LAMTOR3	0.574136	-0.574136
PRKAG1	0.574005	-0.574005
DNAJC8	-0.573961	0.573961
EXOSC5	-0.573637	0.573637
STRIP1	-0.573637	0.573637
INVS	-0.573403	0.573403
TIGD7	-0.573349	0.573349
UQCRQ	0.573284	-0.573284
PELI3	-0.573242	0.573242
GPR107	-0.573181	0.573181
CHP1	0.573091	-0.573091
HARS2	0.572938	-0.572938
HNRNPU-AS1	-0.572852	0.572852
CKS1B	-0.572851	0.572851
PUS7L	0.572782	-0.572782
LOC100130428	-0.572755	0.572755
FLVCR1	-0.572659	0.572659
BBS1	-0.572585	0.572585
EFNA4	-0.572436	0.572436
ENAH	-0.572432	0.572432
TTLL12	0.572362	-0.572362
SNRPA1	-0.572353	0.572353
NIPSNAP3A	0.572338	-0.572338
IL4R	-0.57231	0.57231
WDR78	-0.572151	0.572151
PAX8-AS1	-0.572082	0.572082
PUF60	-0.571919	0.571919
PTBP3	0.571918	-0.571918
THAP11	-0.571881	0.571881
FTL	-0.571834	0.571834
RNF219	-0.571786	0.571786
STAT5A	-0.571749	0.571749
MYPOP	-0.571682	0.571682
CCDC6	0.57163	-0.57163
CD59	0.571559	-0.571559
IL17D	-0.571418	0.571418
FBXL6	-0.571385	0.571385
SLC1A5	-0.571381	0.571381
NUP133	-0.571354	0.571354
KIF4A	-0.571354	0.571354
TXNDC17	0.57111	-0.57111
PRKAB2	0.570998	-0.570998
WDR47	0.570989	-0.570989
NGRN	-0.57096	0.57096
CXXC4	-0.570859	0.570859
PIK3R4	-0.570855	0.570855
RHPN2	-0.570825	0.570825
FPGT	0.570797	-0.570797
MAPKAPK5	-0.570392	0.570392
KIAA0355	-0.570345	0.570345
RP11-452L6.1	-0.570343	0.570343
ZNF446	-0.570267	0.570267
SLC39A1	-0.570261	0.570261
CEP44	-0.570201	0.570201
GOT1	0.570036	-0.570036
C4orf3	0.569901	-0.569901
TMEM8B	-0.569815	0.569815
SNRPG	-0.569803	0.569803
NRBP1	0.569767	-0.569767
C17orf96	-0.569725	0.569725
TMCO1	-0.569682	0.569682
VCPKMT	-0.569594	0.569594
TM7SF3	-0.569503	0.569503
GNL1	-0.569496	0.569496
TAGLN	0.569443	-0.569443
ARID5A	-0.569432	0.569432
PLCH1	0.569235	-0.569235
SREBF2	0.569192	-0.569192
ACTL10	-0.569165	0.569165
POGZ	-0.569081	0.569081
COQ9	0.569042	-0.569042
FZD7	-0.568997	0.568997
TMEM131	0.568906	-0.568906
EXOSC8	-0.568902	0.568902
SYTL2	0.56882	-0.56882
TNFRSF21	0.568695	-0.568695
ACPP	0.568635	-0.568635
PAPSS2	0.568182	-0.568182
CYP2S1	0.568145	-0.568145
ZBED6CL	-0.568085	0.568085
UBXN8	0.56808	-0.56808
HOXB3	0.567743	-0.567743
HIST3H2A	-0.56763	0.56763
HNRNPK	0.567544	-0.567544
CCNDBP1	0.567479	-0.567479
TRRAP	-0.567463	0.567463
LBR	-0.567316	0.567316
TMEM159	0.56729	-0.56729
PPIH	-0.567258	0.567258
TMEM41A	-0.567098	0.567098
TMEM147	-0.566977	0.566977
ASPA	0.566965	-0.566965
ACSS1	-0.566944	0.566944
CENPM	-0.566884	0.566884
TXNIP	0.566774	-0.566774
LYRM7	0.566747	-0.566747
CDC7	-0.566727	0.566727
SCGB2A1	0.566705	-0.566705
LOC101927929	-0.566583	0.566583
KLF3	0.566527	-0.566527
CYP3A5	0.566508	-0.566508
ARHGEF37	0.56641	-0.56641
GSTA1	0.566323	-0.566323
HMGCS2	0.566303	-0.566303
DDHD1	0.566246	-0.566246
TCFL5	-0.566238	0.566238
VDAC2	0.566148	-0.566148
CPE	0.566116	-0.566116
TOMM5	-0.565467	0.565467
TRIM62	-0.565409	0.565409
ZNF580	-0.565369	0.565369
E2F8	-0.565345	0.565345
GNG5	-0.565115	0.565115
C10orf35	-0.564944	0.564944
POLR2H	-0.564903	0.564903
PBLD	0.564823	-0.564823
TDP2	0.564782	-0.564782
SMAD6	-0.564738	0.564738
NXF1	-0.564523	0.564523
SSBP1	0.564508	-0.564508
PEF1	-0.564459	0.564459
SMNDC1	-0.564411	0.564411
MCEE	0.564402	-0.564402
ORAI2	-0.564317	0.564317
TSTD1	-0.564249	0.564249
CDK10	-0.564192	0.564192
SPATA2	-0.564017	0.564017
RBM7	0.563934	-0.563934
JAM2	0.56391	-0.56391
MBNL1	0.563827	-0.563827
C6orf226	-0.563791	0.563791
CELSR3	-0.563594	0.563594
STX7	0.563524	-0.563524
NAA60	-0.563484	0.563484
SUMO4	0.563401	-0.563401
ACADS	0.563343	-0.563343
CLPTM1	0.563308	-0.563308
ZNF512	0.563184	-0.563184
REEP1	0.563164	-0.563164
ZNF623	-0.563019	0.563019
ZSCAN31	0.563017	-0.563017
BRI3	-0.562863	0.562863
FSTL1	-0.562844	0.562844
KEAP1	-0.562611	0.562611
SNX9	0.562244	-0.562244
CCL11	0.562197	-0.562197
ZNF195	-0.562044	0.562044
LGALS8	-0.562027	0.562027
NFKB2	0.562017	-0.562017
C1R	-0.561985	0.561985
TBC1D23	0.561845	-0.561845
ARRDC4	0.561807	-0.561807
ENY2	-0.561805	0.561805
EDEM3	0.561788	-0.561788
PLGRKT	0.5617	-0.5617
MICA	-0.561611	0.561611
IER2	-0.561555	0.561555
AC006026.13	-0.56123	0.56123
RNF149	0.561222	-0.561222
PHF11	-0.561218	0.561218
LZTS2	-0.561164	0.561164
FAM172A	0.561139	-0.561139
SLC25A44	-0.561095	0.561095
MXRA5	-0.561081	0.561081
SSNA1	-0.561056	0.561056
ERCC1	-0.560899	0.560899
FLJ45513	-0.560878	0.560878
DBT	0.560866	-0.560866
CDCA4	-0.560826	0.560826
CWC27	-0.560779	0.560779
PTPDC1	-0.560761	0.560761
DPM1	-0.560681	0.560681
ATP11A	-0.560646	0.560646
FBXO21	0.5606	-0.5606
FZD5	-0.560386	0.560386
IKBKG	-0.560301	0.560301
RASAL3	-0.560259	0.560259
SCAND1	-0.560225	0.560225
HIPK2	0.559992	-0.559992
NOL11	-0.559912	0.559912
TMEM209	0.559861	-0.559861
ODAM	0.559845	-0.559845
PI4KB	-0.559838	0.559838
CAPN6	0.559776	-0.559776
NAB1	0.559512	-0.559512
SEMA4C	-0.55929	0.55929
ZMYM1	-0.559281	0.559281
GKN2	0.559155	-0.559155
NCK1-AS1	-0.559148	0.559148
CRISPLD1	-0.559048	0.559048
PIAS1	0.559017	-0.559017
USB1	-0.559006	0.559006
KIAA1462	-0.558897	0.558897
RRP15	-0.558859	0.558859
MT1HL1	0.558717	-0.558717
UBA5	0.558714	-0.558714
PGM2	0.558606	-0.558606
CHRAC1	-0.558564	0.558564
MRPL48	-0.558405	0.558405
SLC45A3	0.558398	-0.558398
C16orf72	0.558067	-0.558067
RP11-61L19.3	-0.557987	0.557987
COA6	-0.557787	0.557787
ABCA7	-0.557757	0.557757
ACSL1	0.557455	-0.557455
SGTA	-0.55737	0.55737
SNX24	0.557236	-0.557236
SUV39H2	-0.55713	0.55713
LRRC31	0.556949	-0.556949
RAD54B	-0.556847	0.556847
WDR18	-0.556761	0.556761
PMF1	-0.55659	0.55659
NEFM	0.556507	-0.556507
SLFN11	-0.556502	0.556502
TMEM127	-0.556385	0.556385
C22orf39	0.556299	-0.556299
TRIB1	-0.556292	0.556292
NUDT16P1	-0.556245	0.556245
JAG2	-0.556119	0.556119
TRNT1	0.556114	-0.556114
NNT	0.556069	-0.556069
C8orf33	-0.55584	0.55584
STARD10	0.555835	-0.555835
PIP5K1C	-0.555822	0.555822
XIAP	0.55581	-0.55581
OSER1	-0.555656	0.555656
STK40	-0.555626	0.555626
SDR16C5	0.555606	-0.555606
GANC	0.555592	-0.555592
D2HGDH	-0.555578	0.555578
CHCHD10	0.555539	-0.555539
CLECL1	0.555472	-0.555472
SFRP4	-0.555316	0.555316
NCOA4	0.555284	-0.555284
AK9	0.555274	-0.555274
GAR1	-0.555214	0.555214
CPSF3L	-0.555213	0.555213
FAM199X	-0.555152	0.555152
NSMCE2	-0.555138	0.555138
AJUBA	-0.555053	0.555053
RREB1	0.555035	-0.555035
FAM126B	0.554978	-0.554978
PLS1	0.55493	-0.55493
TAF10	-0.554921	0.554921
RAD51C	-0.554904	0.554904
U2SURP	-0.554901	0.554901
NDUFAB1	0.554833	-0.554833
SLC25A45	-0.554804	0.554804
TRMT1	-0.55466	0.55466
REG4	0.554649	-0.554649
RAP2B	0.554508	-0.554508
AKR7A3	0.5545	-0.5545
RAB11FIP1	0.554466	-0.554466
WDR83OS	-0.554417	0.554417
CCDC178	0.554394	-0.554394
LOC101929709	-0.554302	0.554302
ARPC4	0.554285	-0.554285
LOC100506325	-0.554073	0.554073
VSIG10L	0.55407	-0.55407
LIG3	-0.554027	0.554027
RP11-672L10.6	-0.55398	0.55398
STXBP1	-0.553971	0.553971
MIPEPP3	-0.553853	0.553853
ADAT1	-0.553825	0.553825
CTC-471F3.6	0.553743	-0.553743
UBE2H	0.553605	-0.553605
DTWD2	0.553561	-0.553561
LRRC37A2	0.55348	-0.55348
TPM2	-0.553372	0.553372
DHX58	-0.553284	0.553284
WDR83	-0.553272	0.553272
NEU1	-0.553111	0.553111
LIG1	-0.553063	0.553063
GPAM	0.553017	-0.553017
MRAP2	0.552956	-0.552956
DBF4	-0.552691	0.552691
SLC38A11	0.552482	-0.552482
DKFZP586I1420	-0.552459	0.552459
TNRC6C-AS1	-0.552396	0.552396
C1orf54	-0.552324	0.552324
GADD45A	0.552125	-0.552125
PTPRZ1	0.552018	-0.552018
RAB36	-0.551783	0.551783
SH3BGRL2	0.551778	-0.551778
ANKRD11	-0.551765	0.551765
LOC100129361	-0.551747	0.551747
FOSL1	-0.551712	0.551712
SNRNP70	-0.551362	0.551362
ENTPD4	0.551286	-0.551286
COL12A1	-0.551194	0.551194
SUGT1	-0.551176	0.551176
STAM2	0.551126	-0.551126
SRSF3	0.551095	-0.551095
METTL4	-0.551021	0.551021
LOC101927609	-0.550913	0.550913
HARBI1	-0.550906	0.550906
RAB40B	-0.550903	0.550903
ANAPC7	-0.550704	0.550704
SQRDL	0.550661	-0.550661
[truncated: 19,653 more rows]
